# Supplementary material for: Gene selection and classification of microarray data using random forest
Source: PubMed Central journal article supplement (PMC1363357; doi:10.1186/1471-2105-7-3), 2006-01-06

## OOB error rate vs. mtry

x-axis: factor that multiplies default mtry [ $\sqrt{\text{number variables}}$ ]

Mtry factors used: {0, 0.05, 0.1, 0.17, 0.25, 0.33, 0.5, 0.75, 0.8, 1, 1.15, 1.33, 1.5, 2, 3, 4, 5, 6, 8, 10, 13}

(mtry factors of 0 means mtry = 1)

I: Simulated data sets:

signal + 4000 noise random variables

(shown first with nodesize = 1, then nodesize = 5)

2 classes; 1 dimensions; 5 genes/dimen.; nodesize = 1

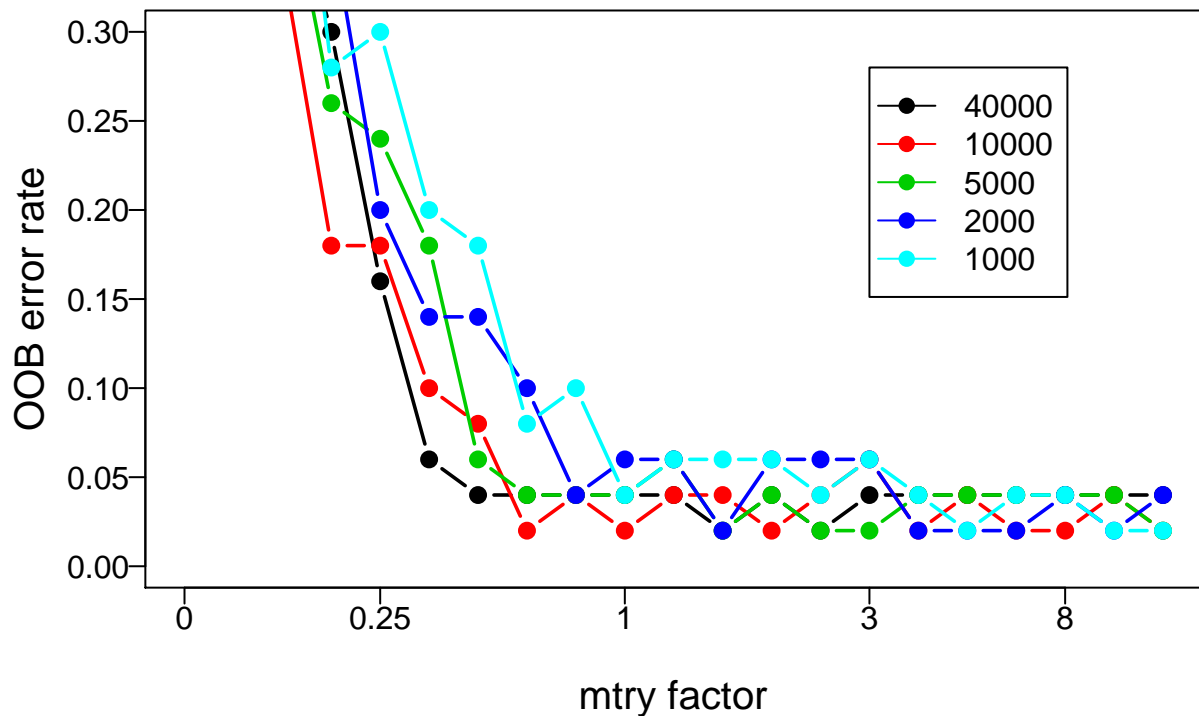

2 classes; 1 dimensions; 5 genes/dimen.; nodesize = 1

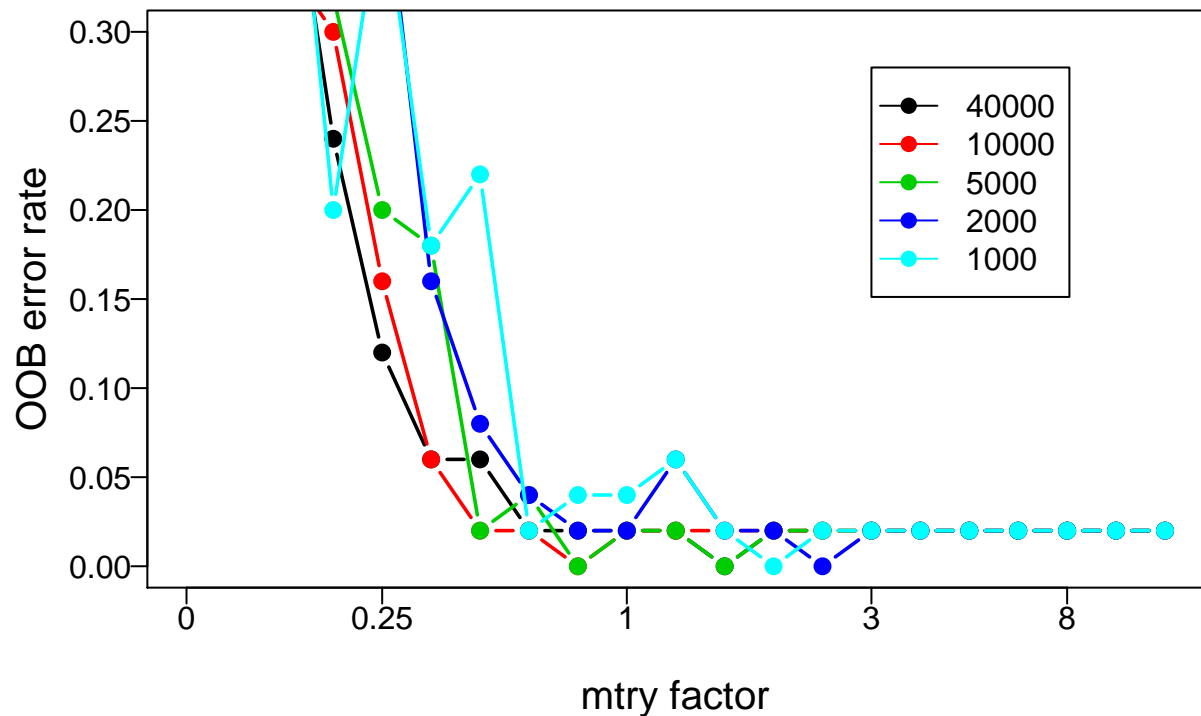

2 classes; 1 dimensions; 5 genes/dimen.; nodesize = 1

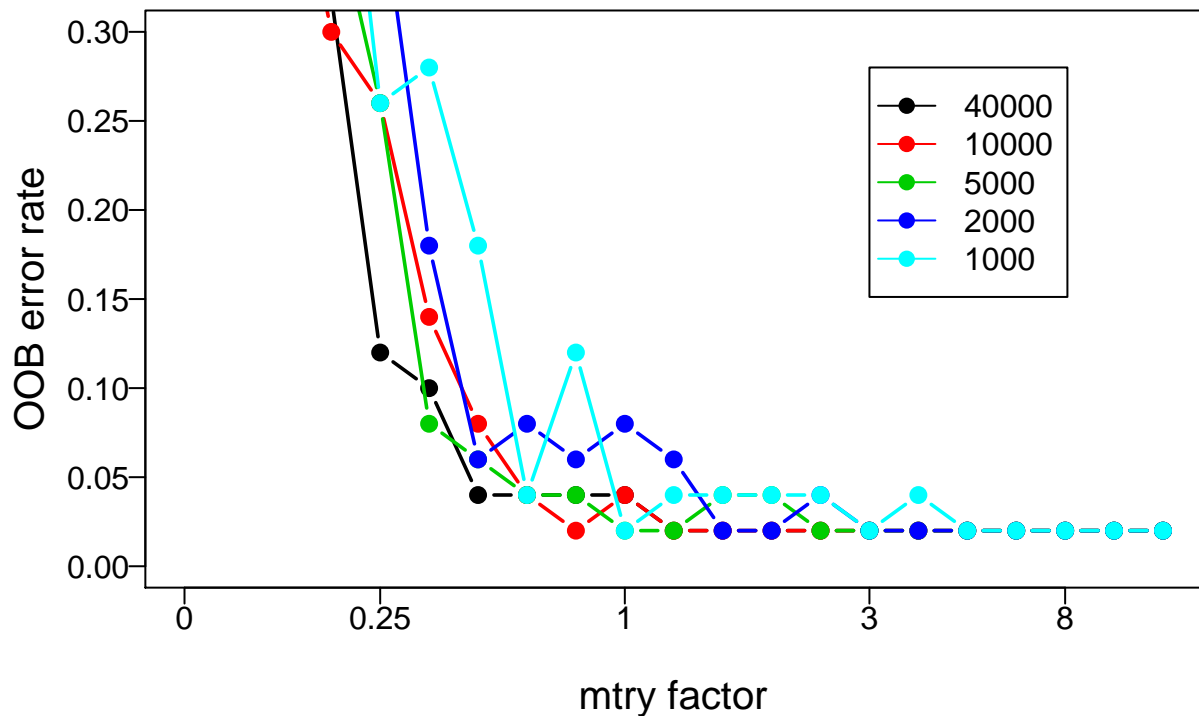

2 classes; 1 dimensions; 5 genes/dimen.; nodesize = 1

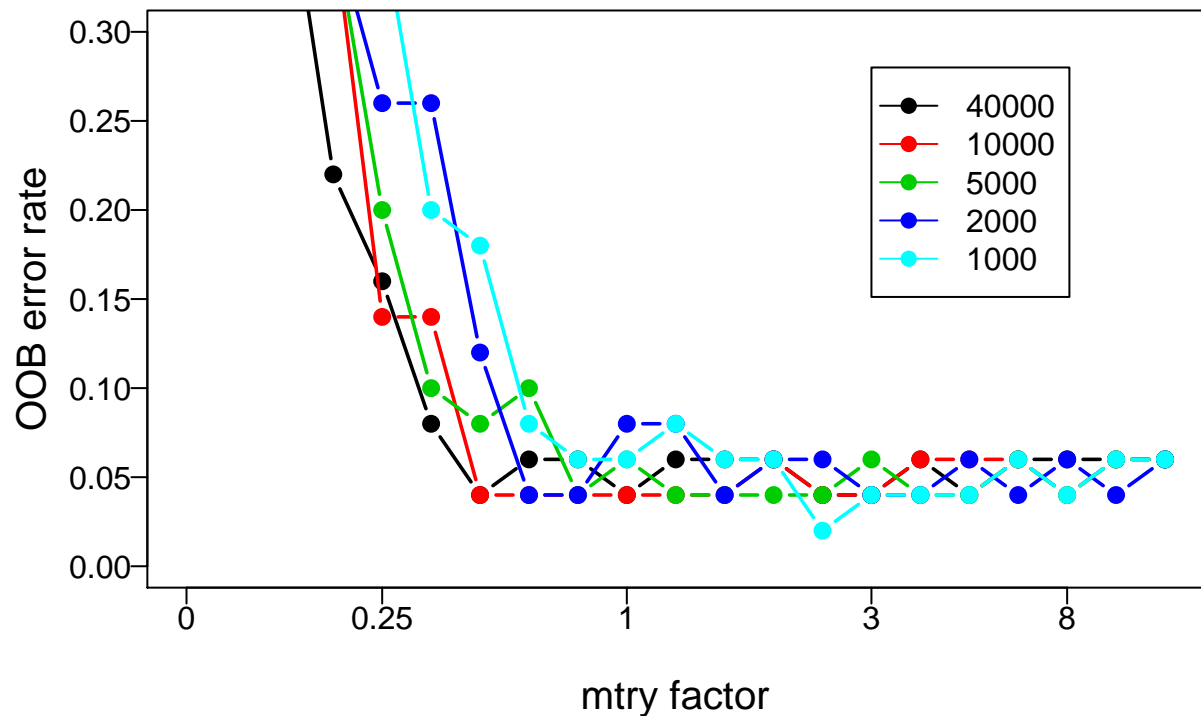

2 classes; 1 dimensions; 20 genes/dimen.; nodesize = 1

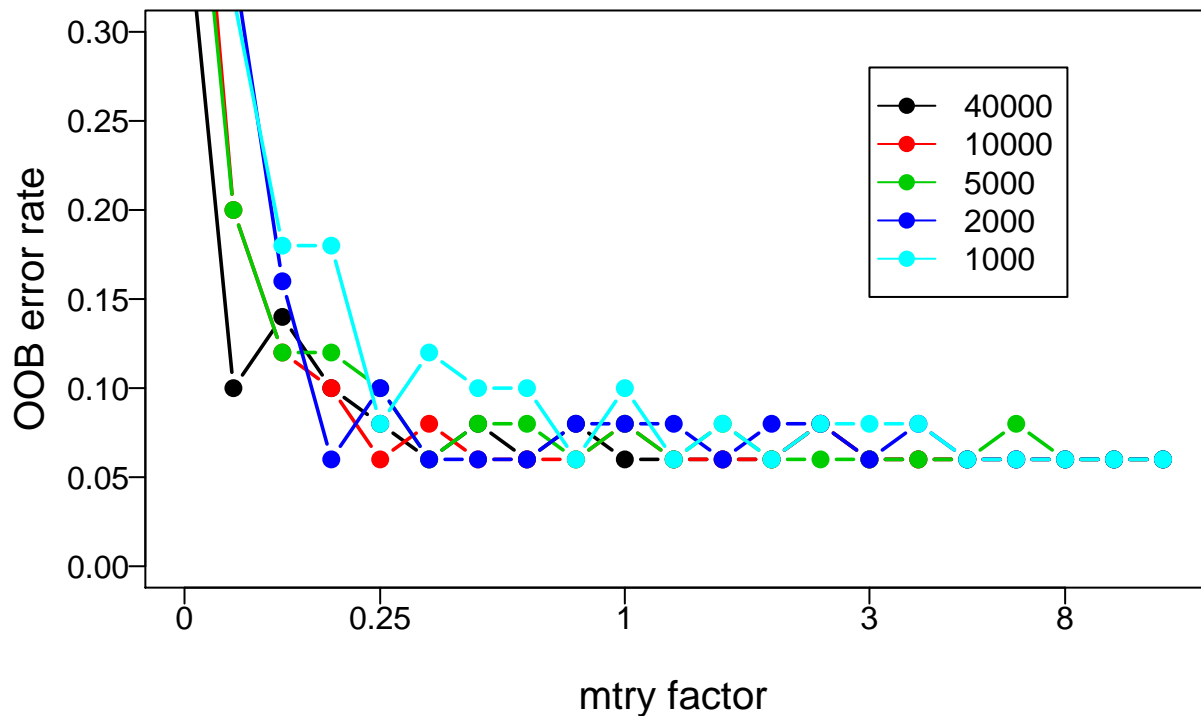

2 classes; 1 dimensions; 20 genes/dimen.; nodesize = 1

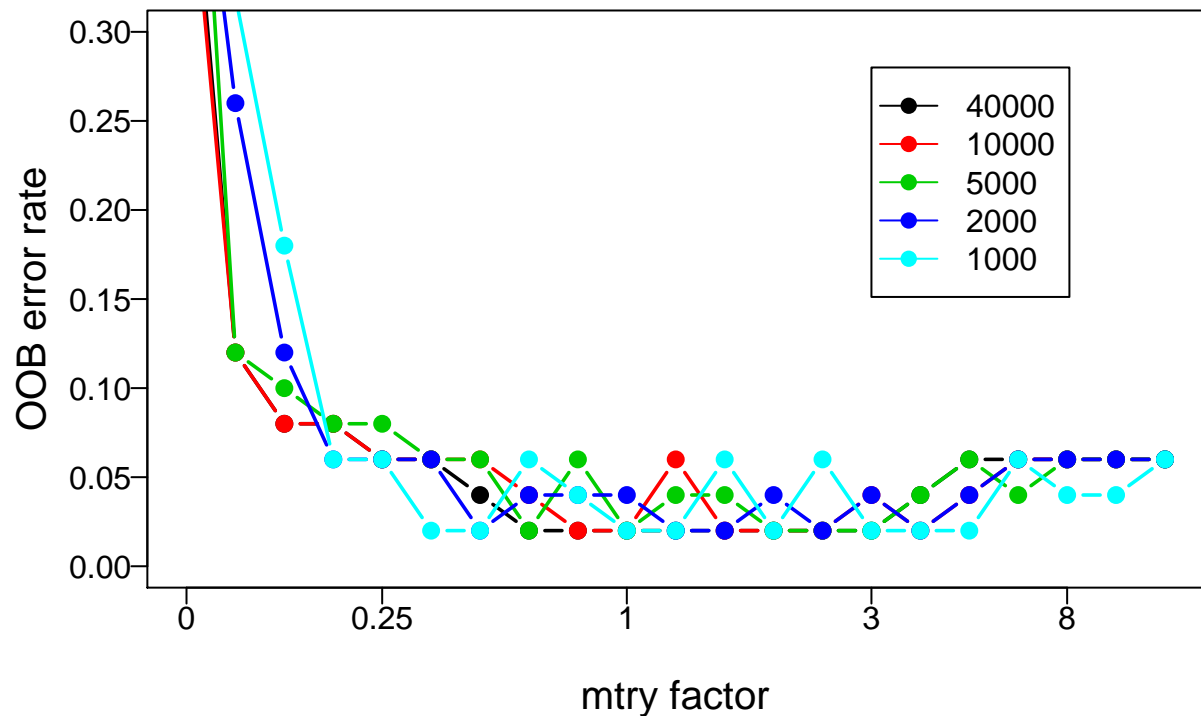

2 classes; 1 dimensions; 20 genes/dimen.; nodesize = 1

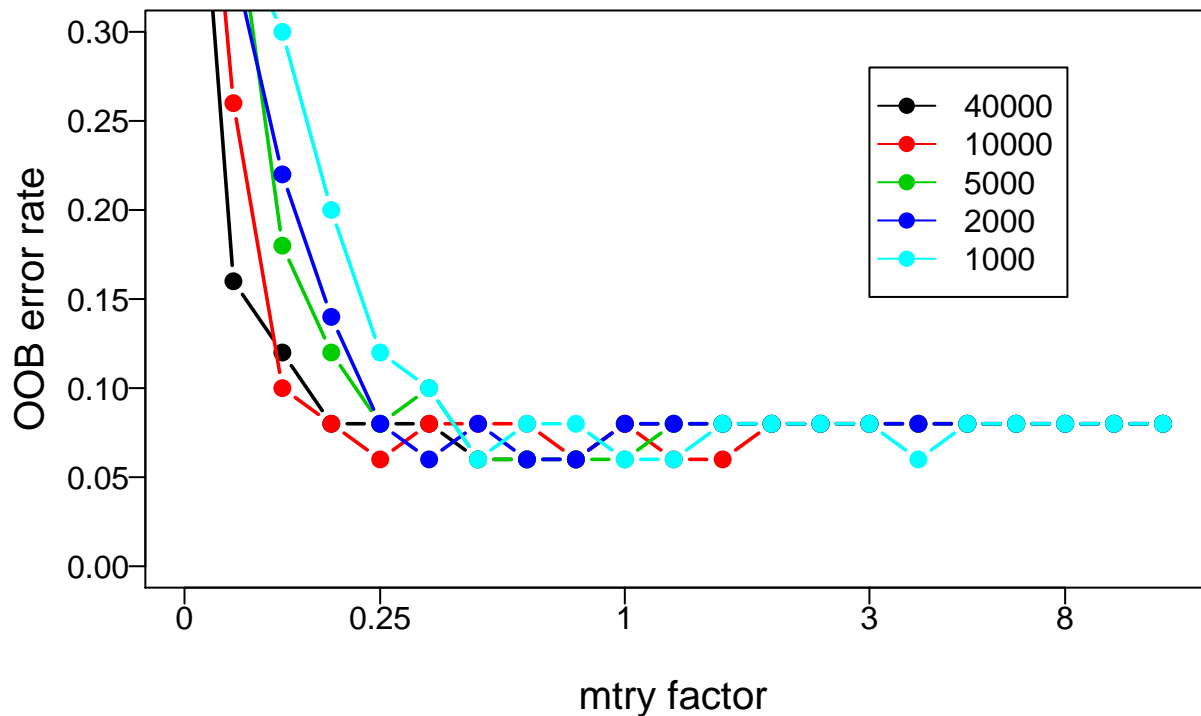

2 classes; 1 dimensions; 20 genes/dimen.; nodesize = 1

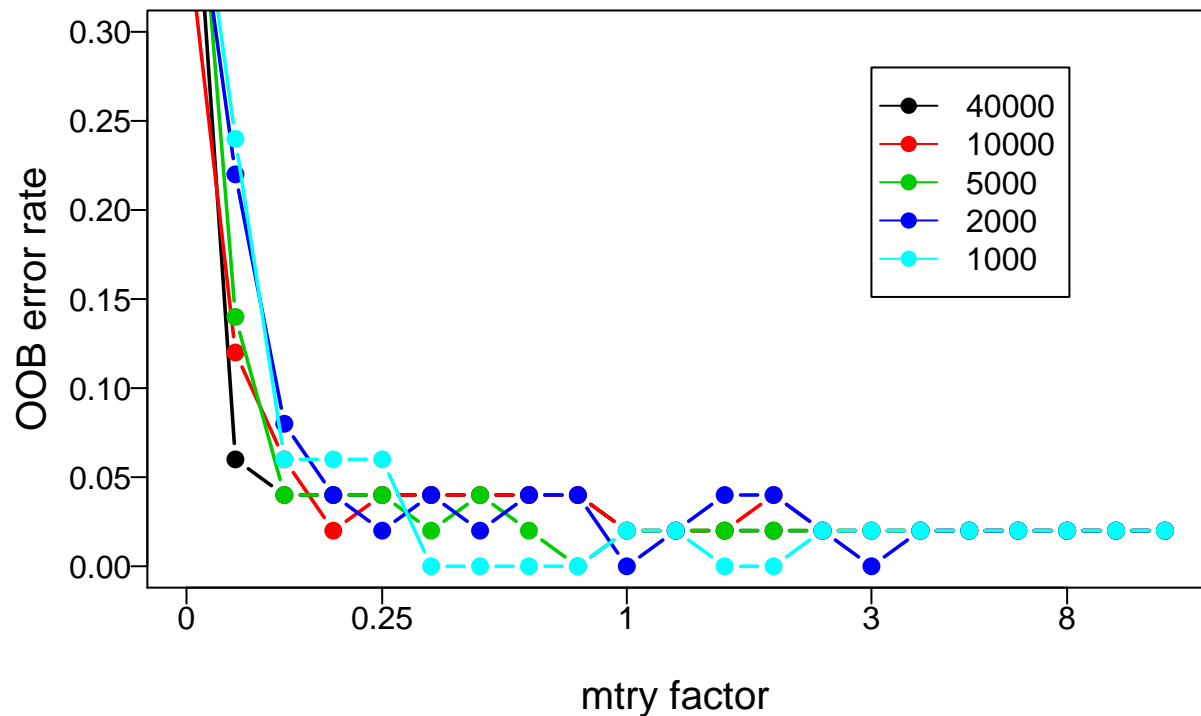

2 classes; 1 dimensions; 100 genes/dimen.; nodesize = 1

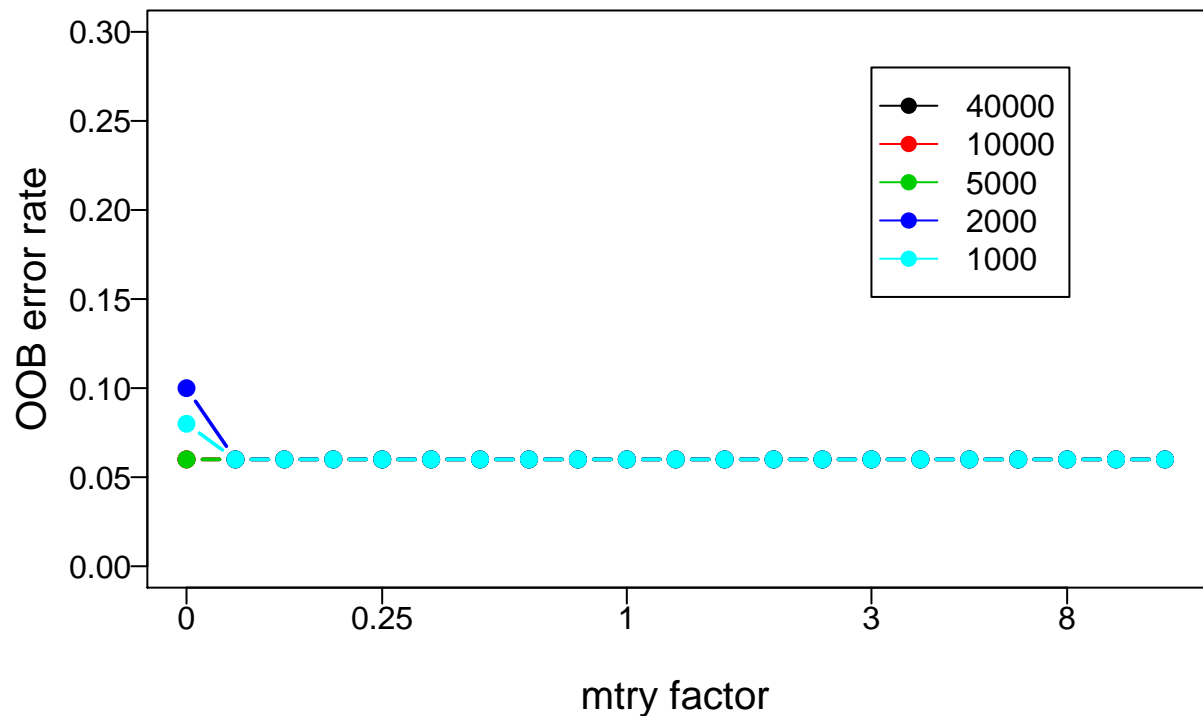

2 classes; 1 dimensions; 100 genes/dimen.; nodesize = 1

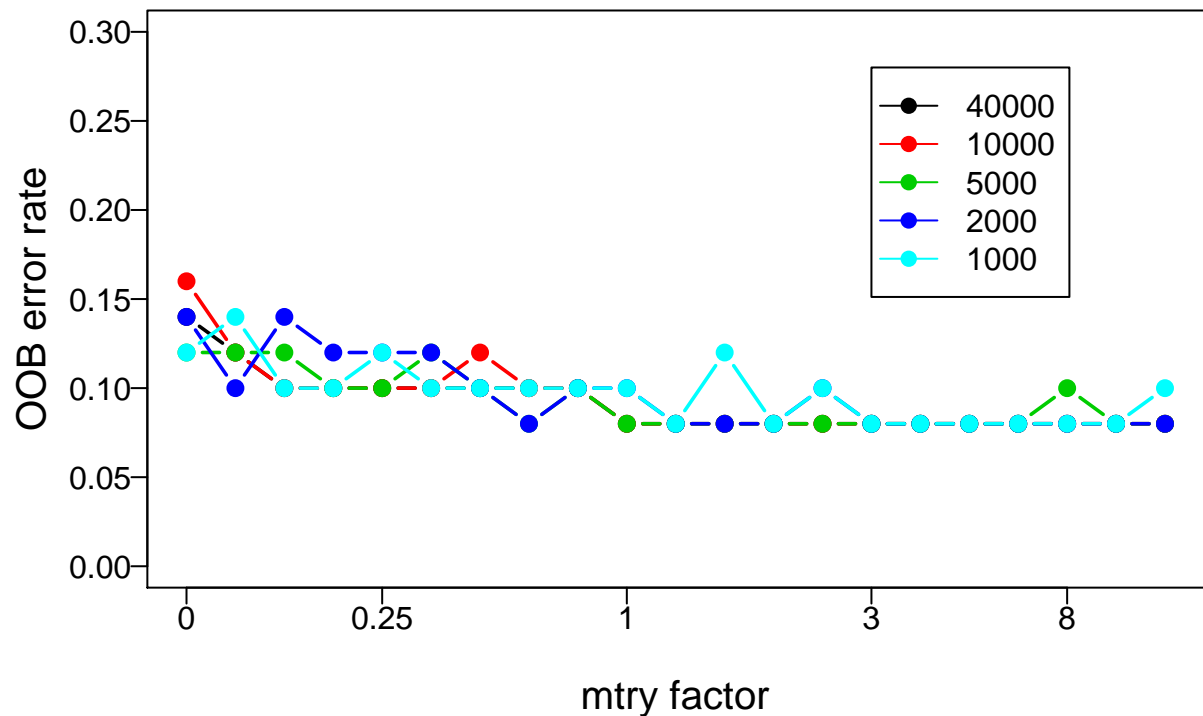

2 classes; 1 dimensions; 100 genes/dimen.; nodesize = 1

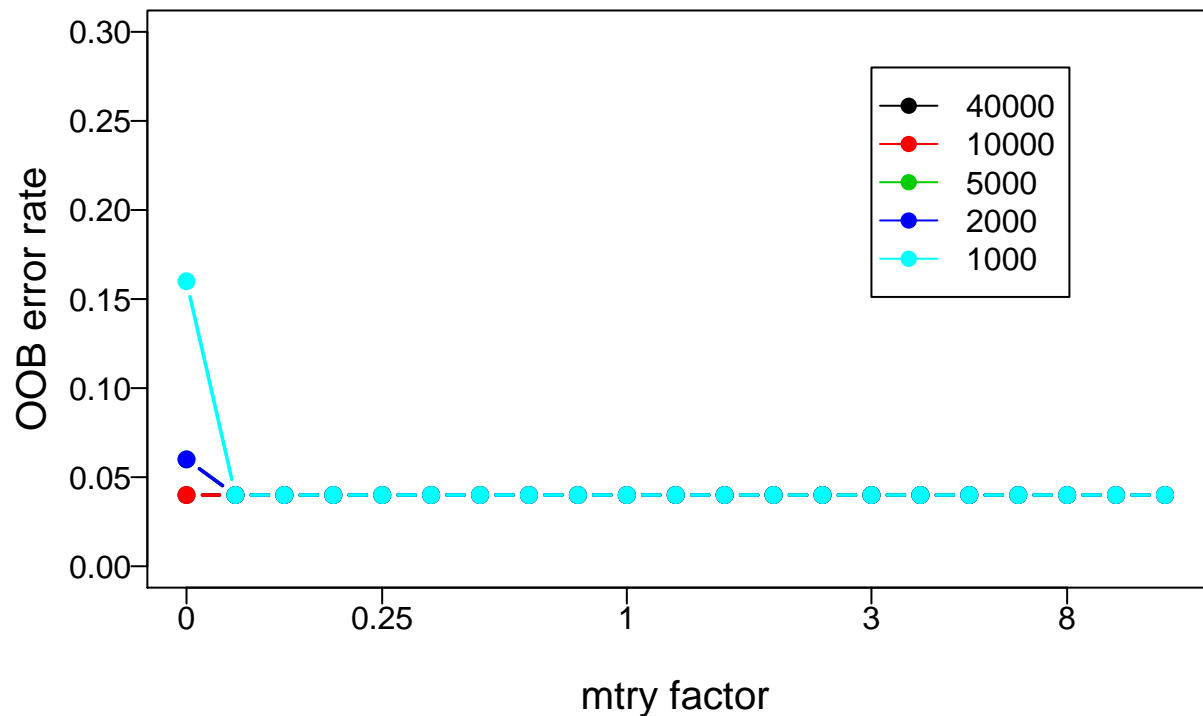

2 classes; 1 dimensions; 100 genes/dimen.; nodesize = 1

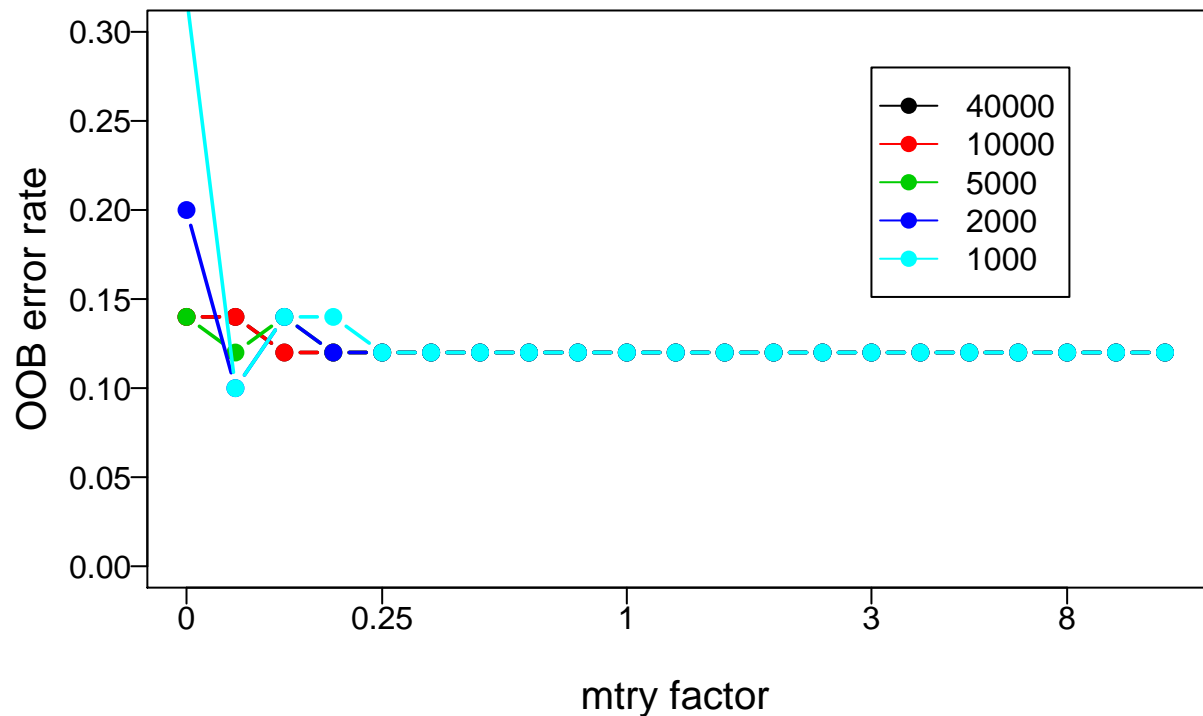

2 classes; 2 dimensions; 5 genes/dimen.; nodesize = 1

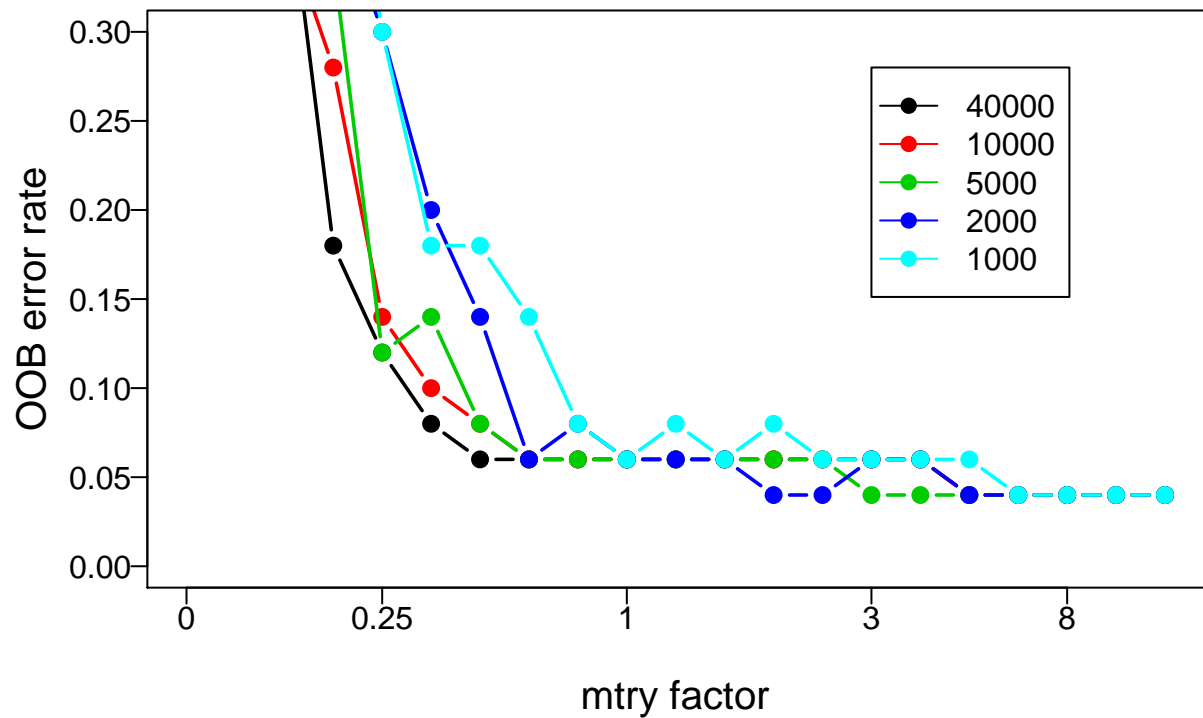

2 classes; 2 dimensions; 5 genes/dimen.; nodesize = 1

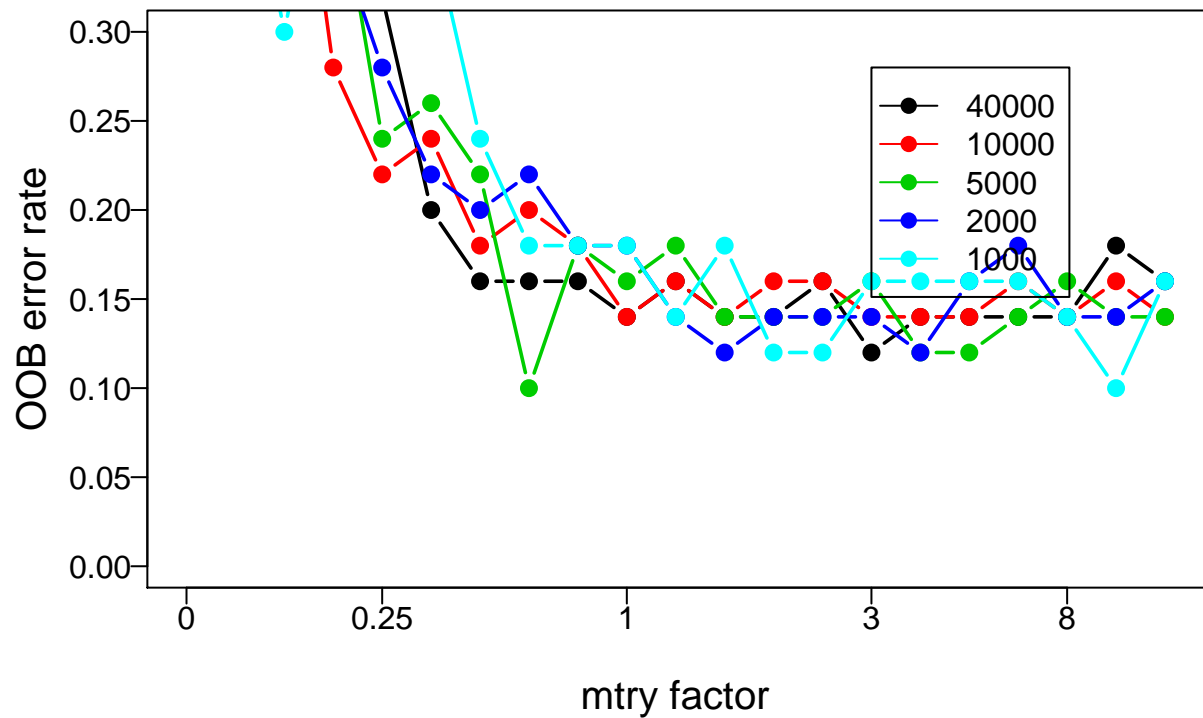

2 classes; 2 dimensions; 5 genes/dimen.; nodesize = 1

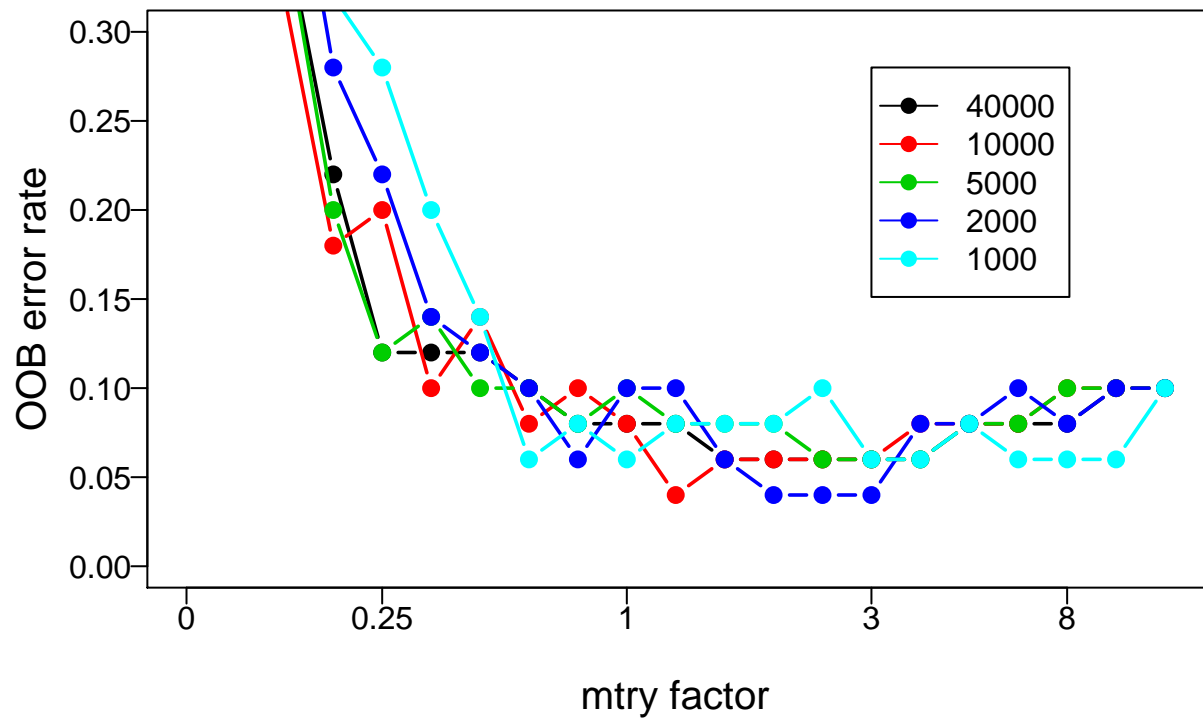

2 classes; 2 dimensions; 5 genes/dimen.; nodesize = 1

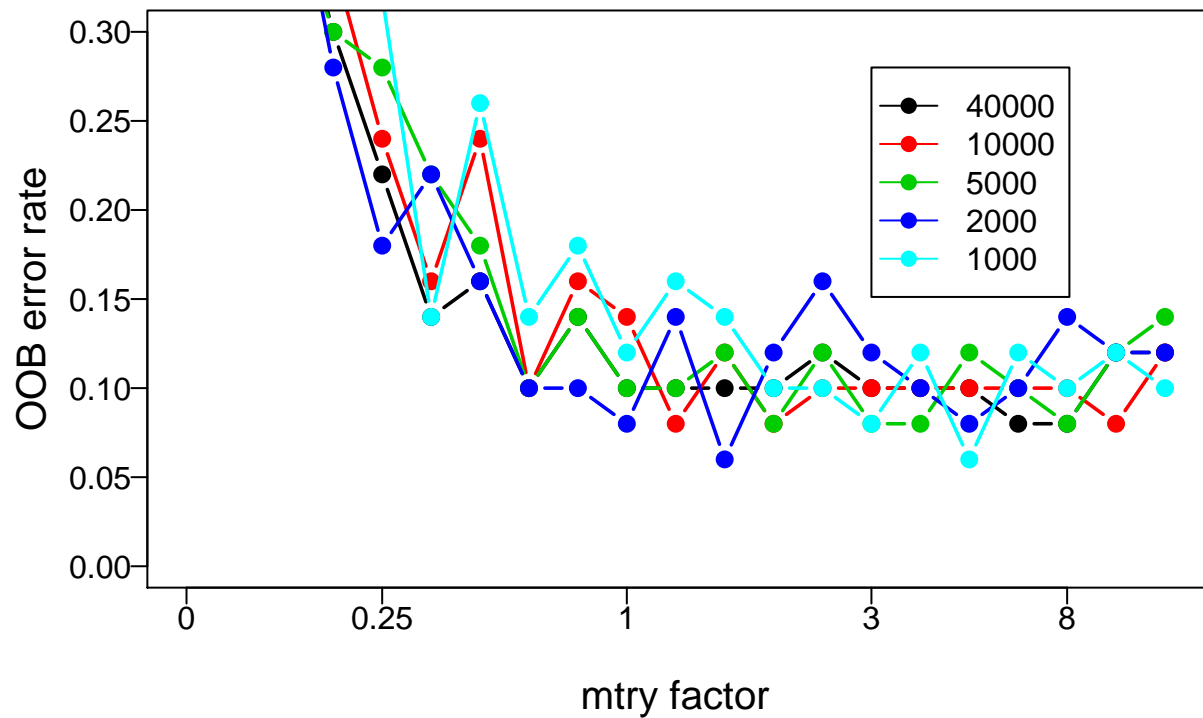

2 classes; 2 dimensions; 20 genes/dimen.; nodesize = 1

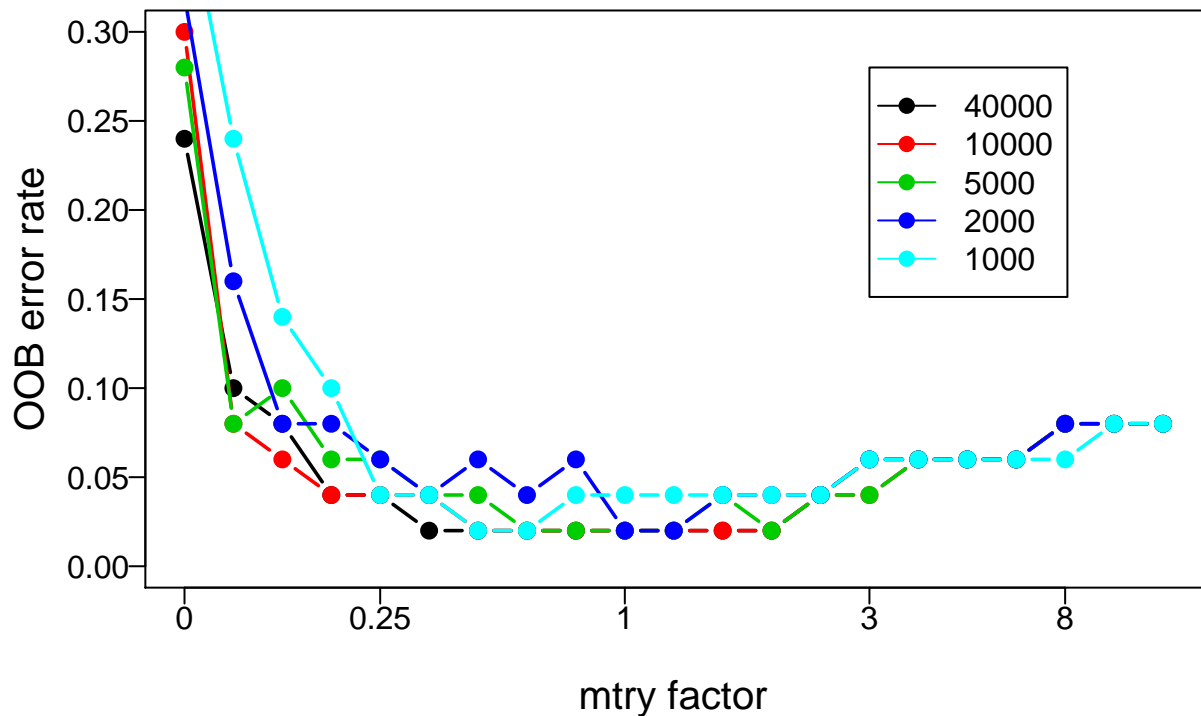

2 classes; 2 dimensions; 20 genes/dimen.; nodesize = 1

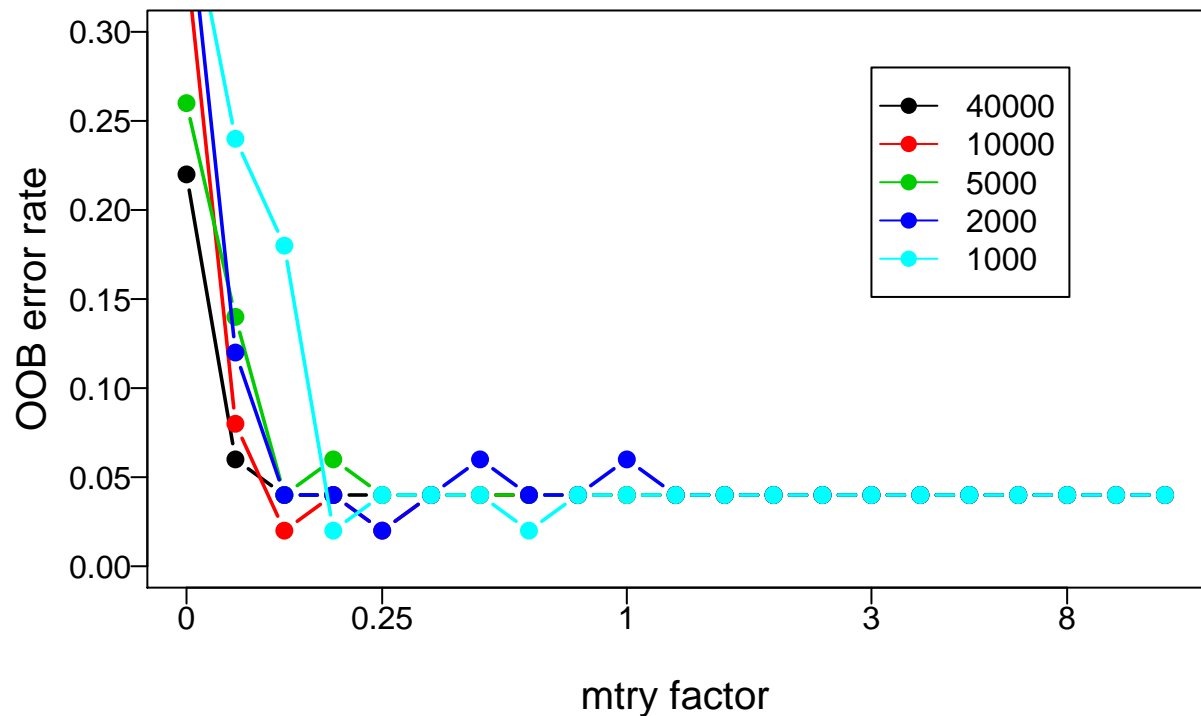

2 classes; 2 dimensions; 20 genes/dimen.; nodesize = 1

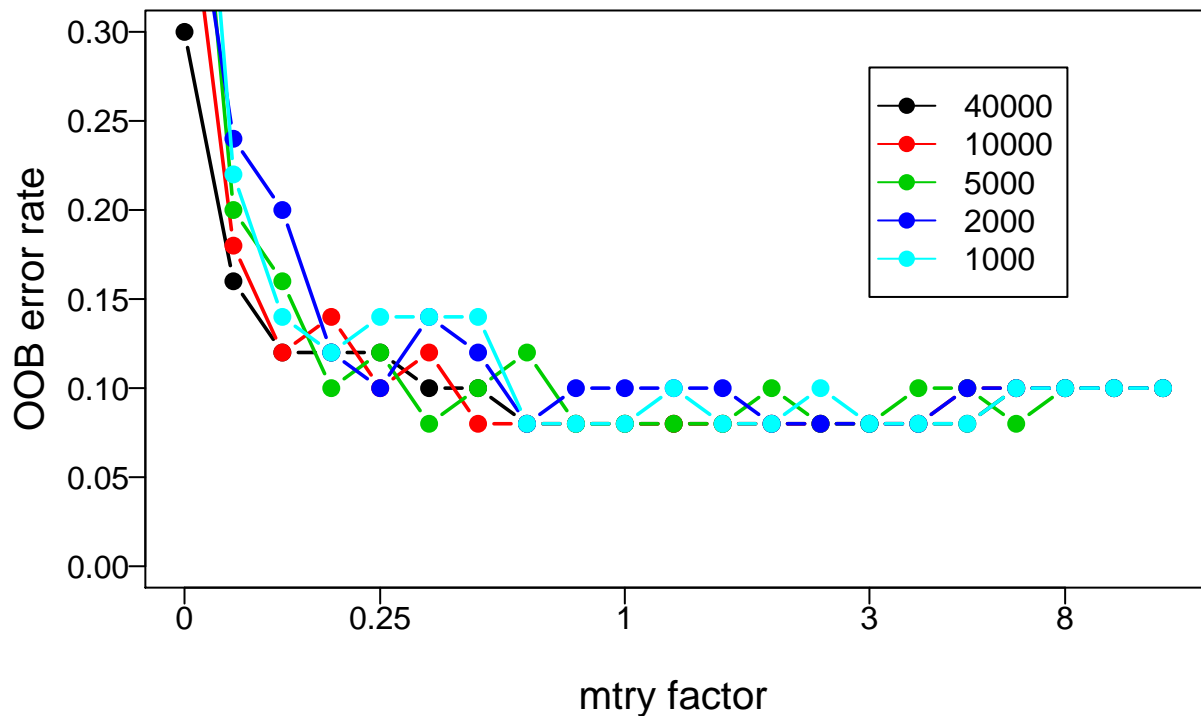

2 classes; 2 dimensions; 20 genes/dimen.; nodesize = 1

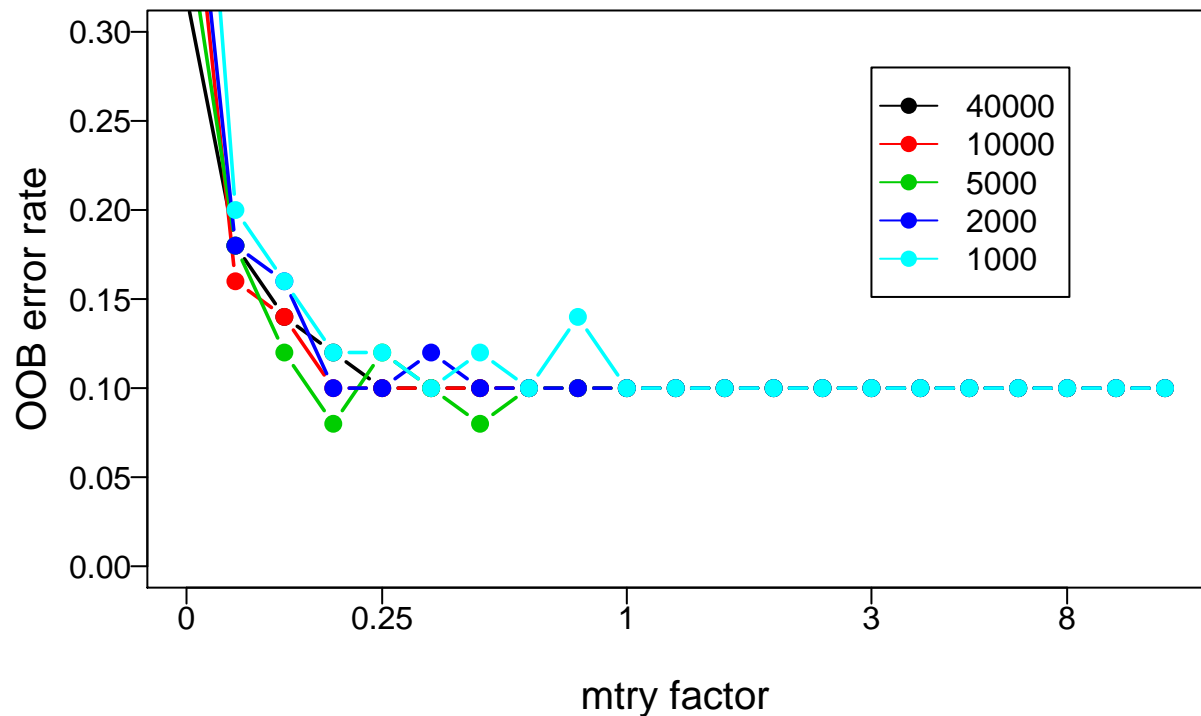

2 classes; 2 dimensions; 100 genes/dimen.; nodesize = 1

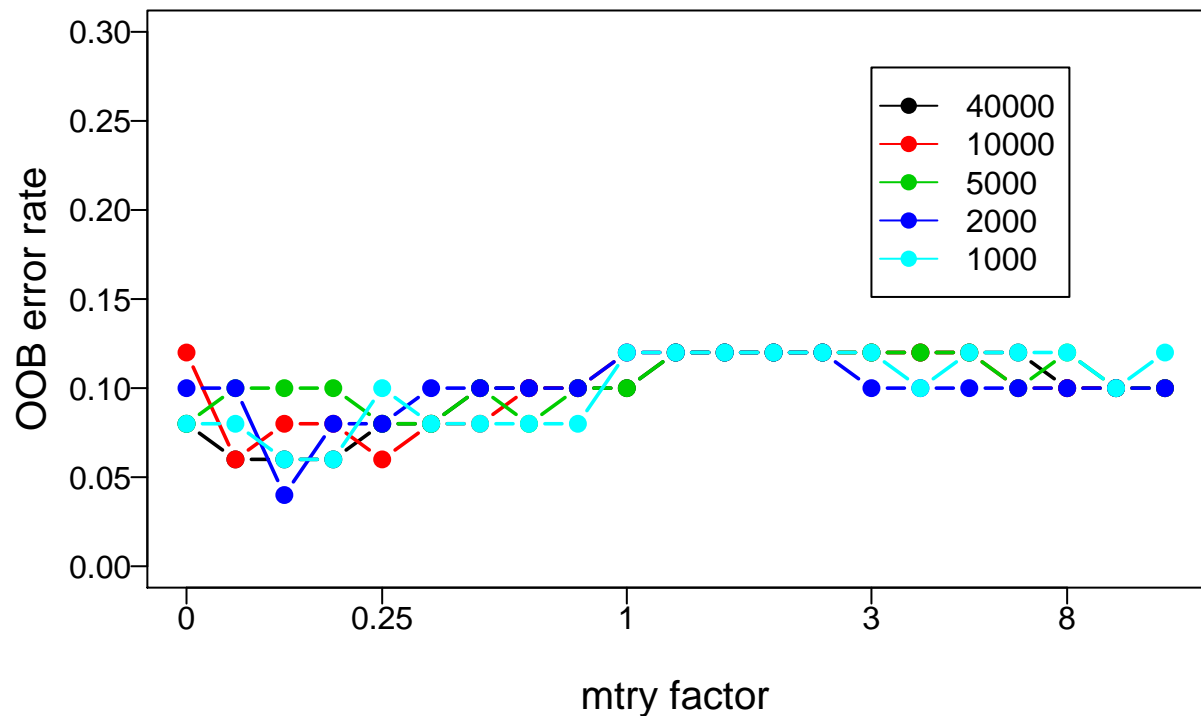

2 classes; 2 dimensions; 100 genes/dimen.; nodesize = 1

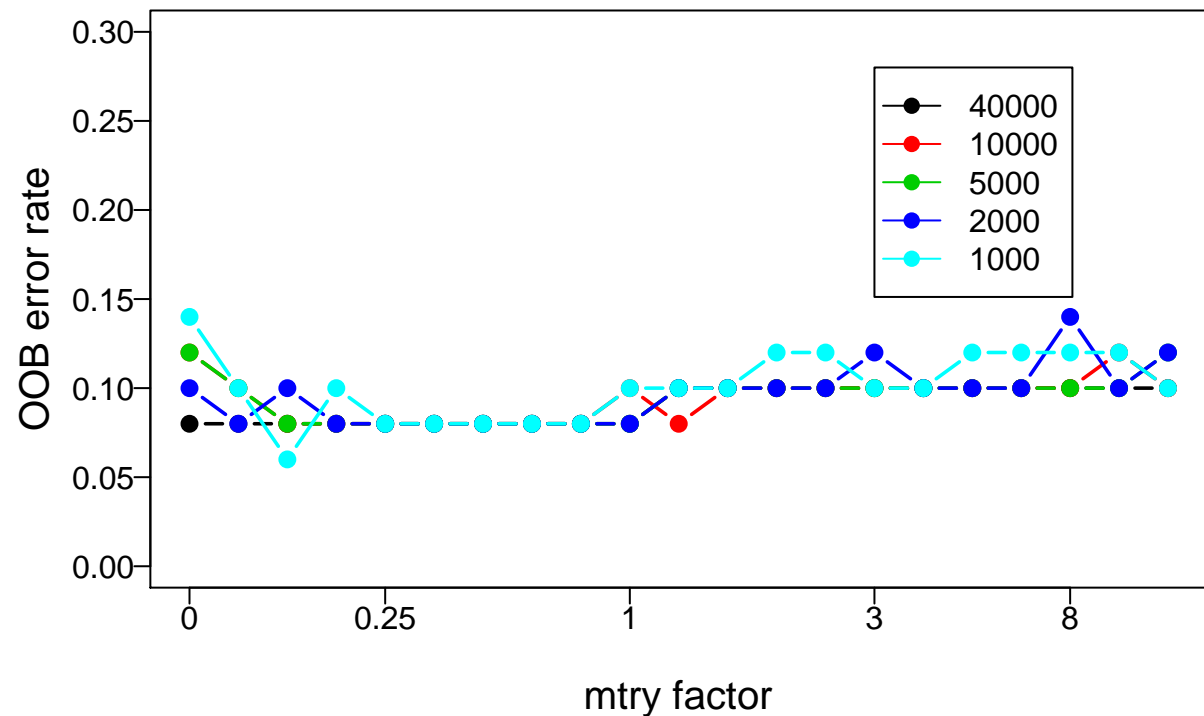

2 classes; 2 dimensions; 100 genes/dimen.; nodesize = 1

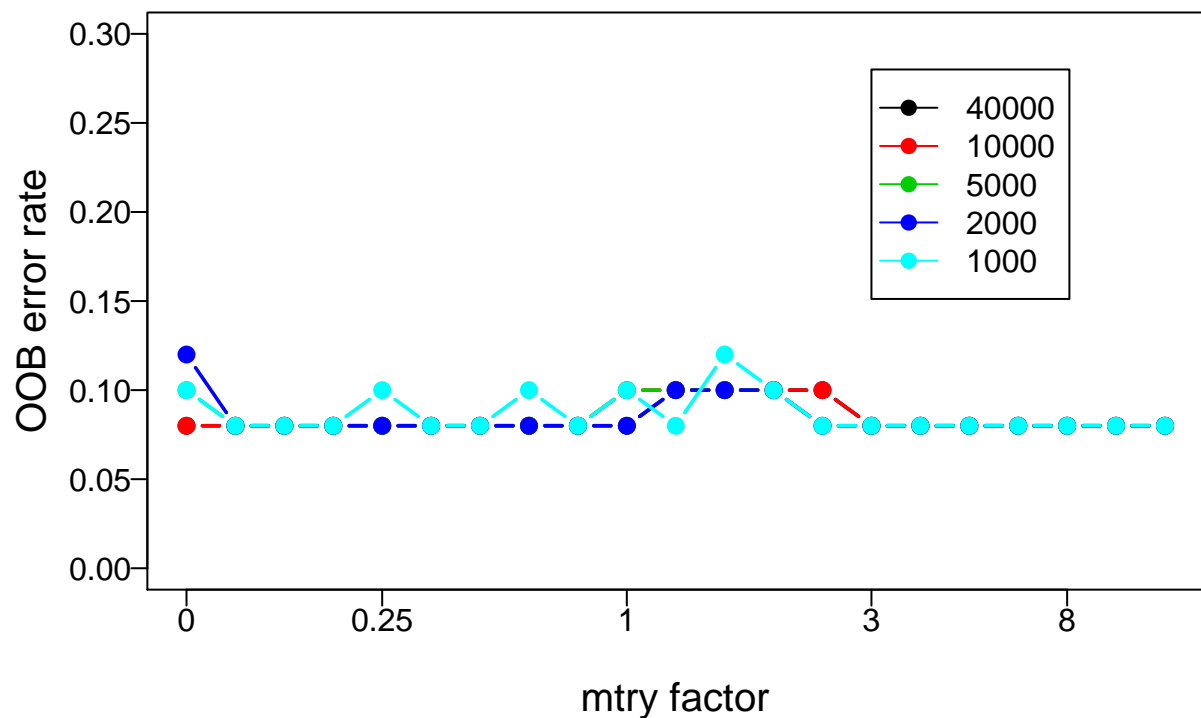

2 classes; 2 dimensions; 100 genes/dimen.; nodesize = 1

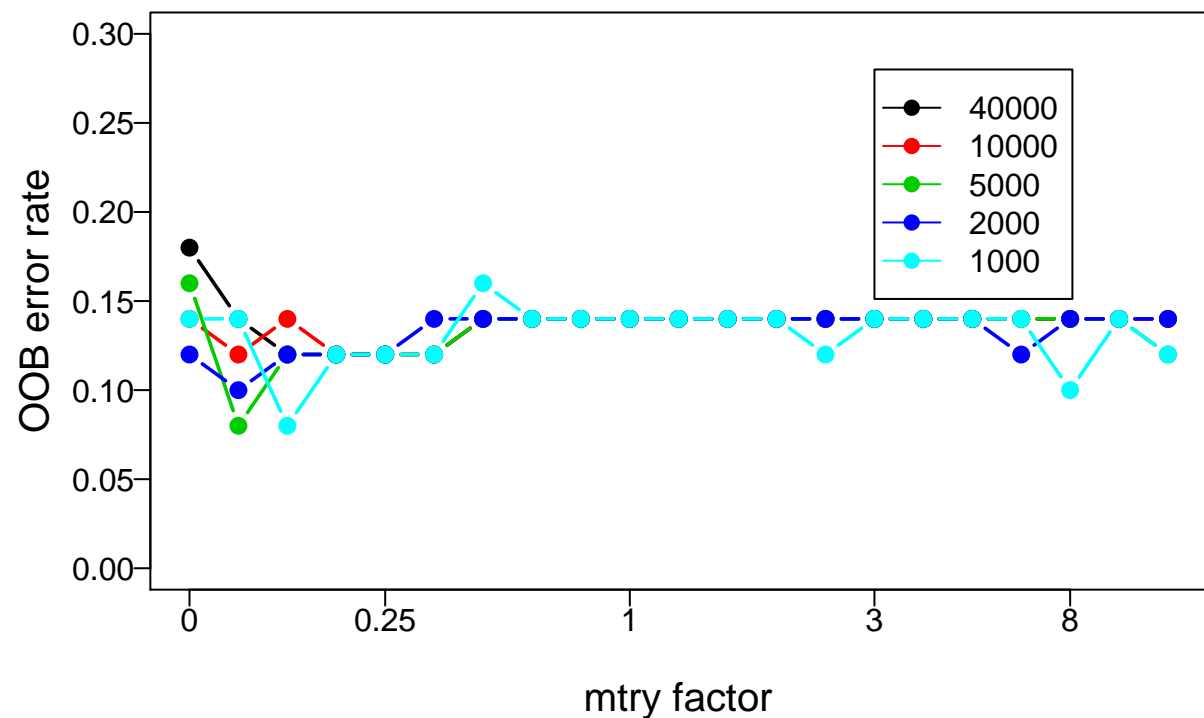

2 classes; 3 dimensions; 5 genes/dimen.; nodesize = 1

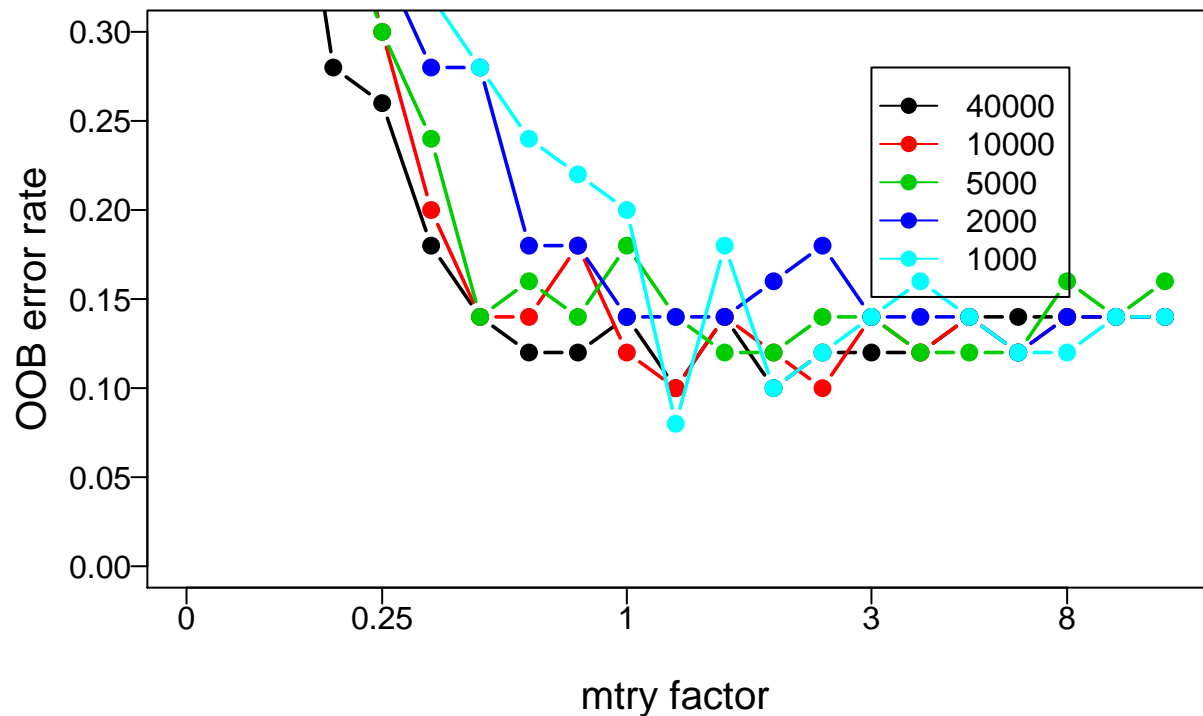

2 classes; 3 dimensions; 5 genes/dimen.; nodesize = 1

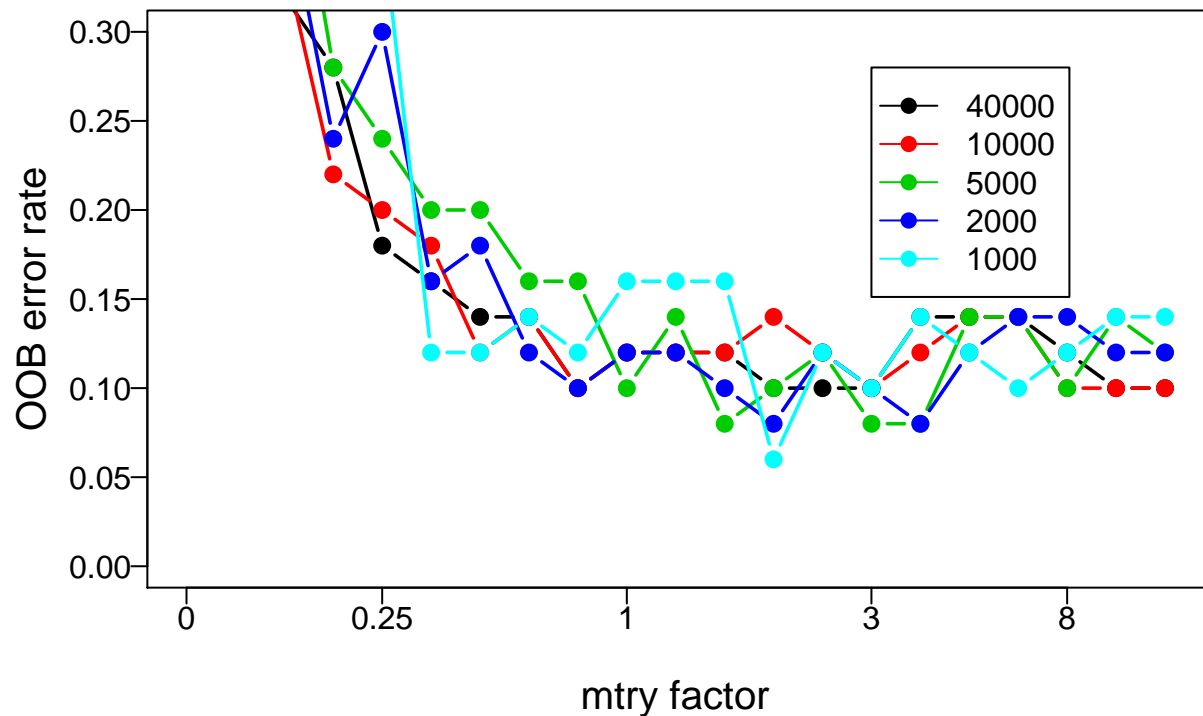

2 classes; 3 dimensions; 5 genes/dimen.; nodesize = 1

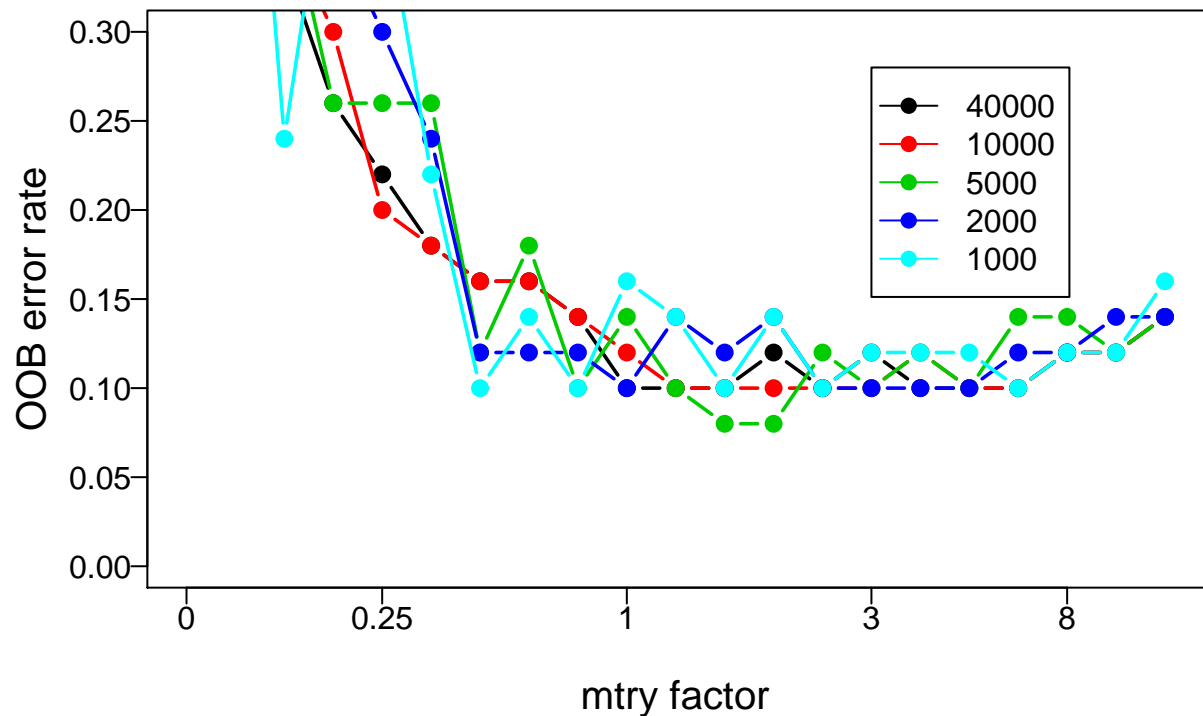

2 classes; 3 dimensions; 5 genes/dimen.; nodesize = 1

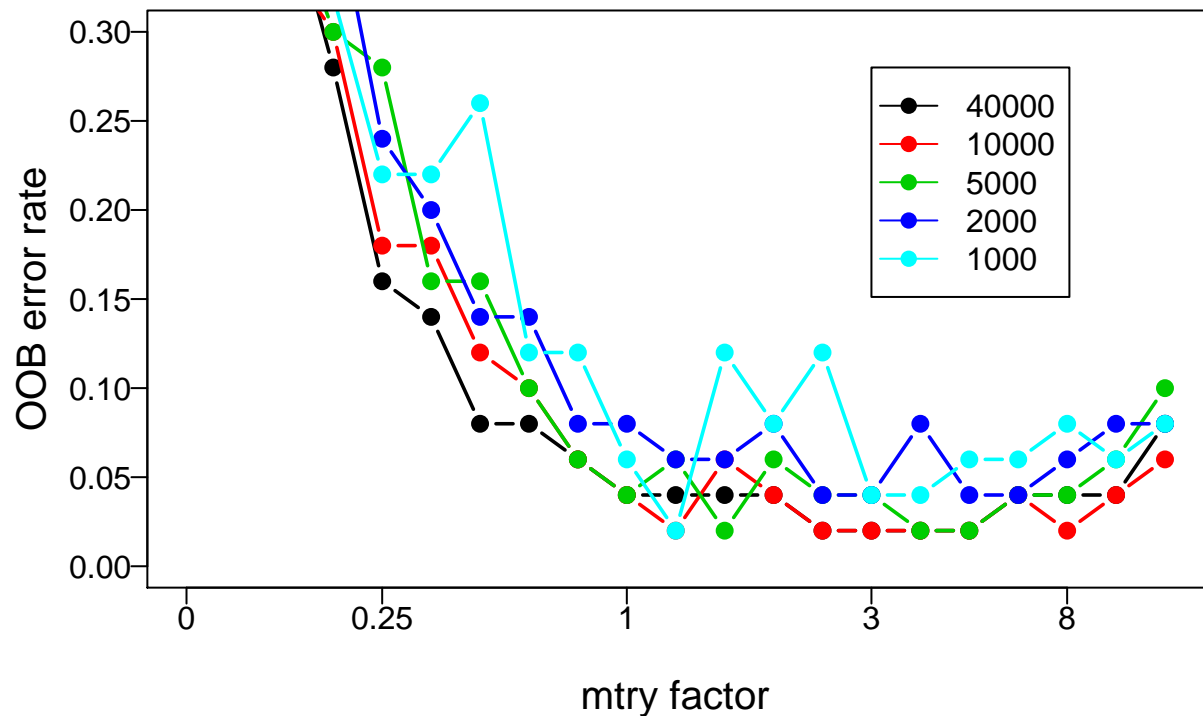



2 classes; 3 dimensions; 20 genes/dimen.; nodesize = 1

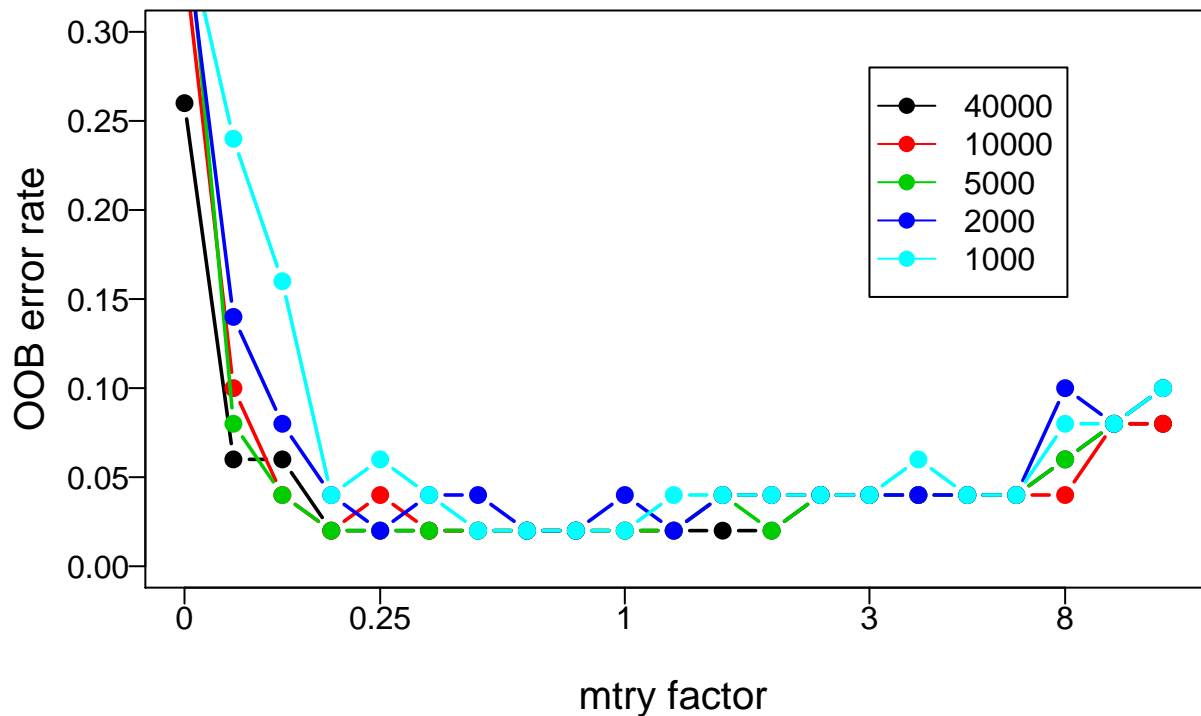

2 classes; 3 dimensions; 20 genes/dimen.; nodesize = 1

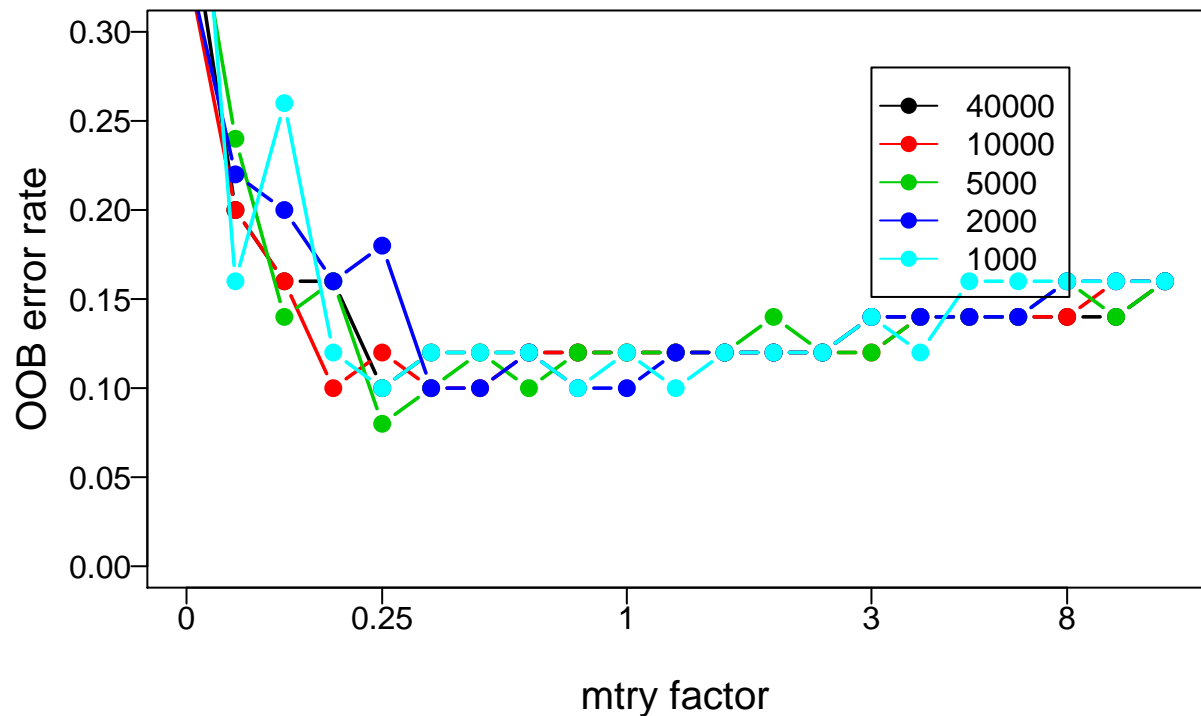

2 classes; 3 dimensions; 20 genes/dimen.; nodesize = 1

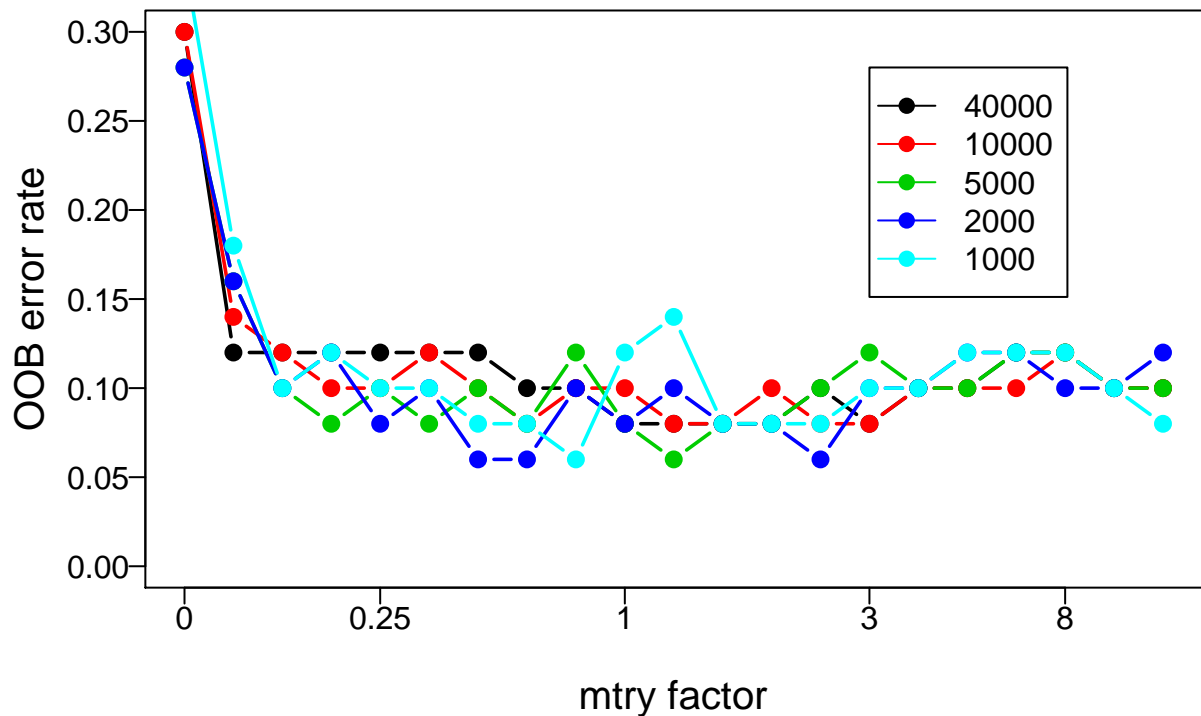

2 classes; 3 dimensions; 20 genes/dimen.; nodesize = 1

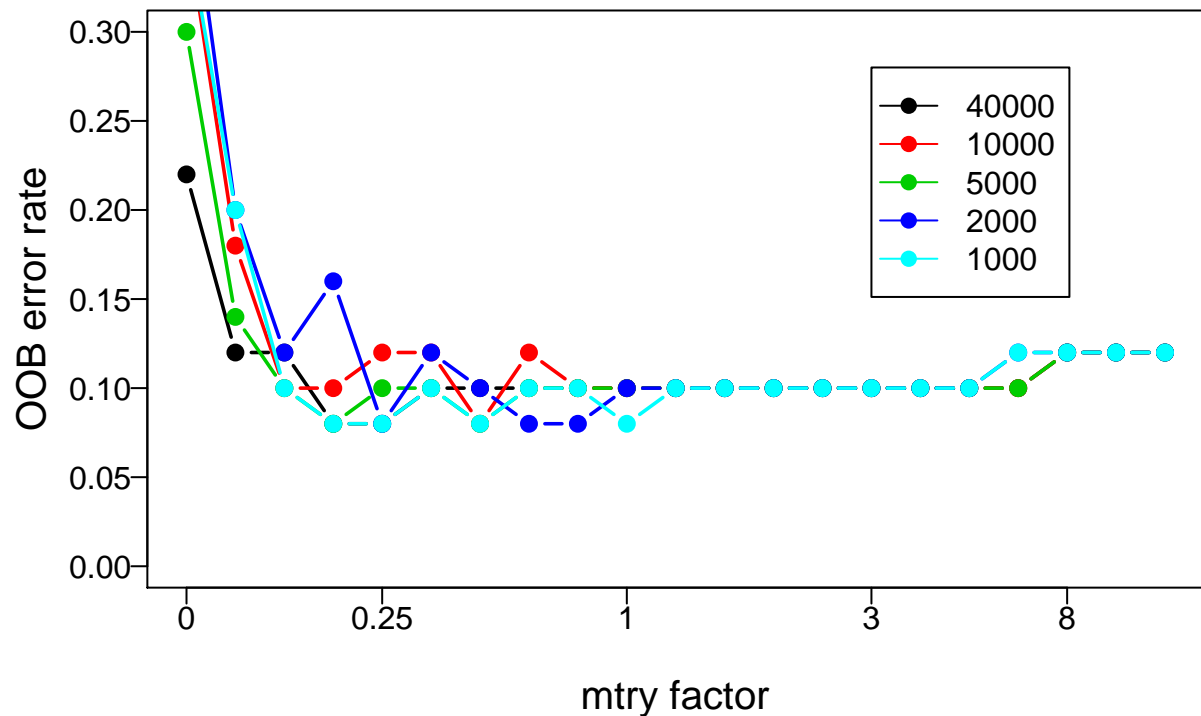

2 classes; 3 dimensions; 100 genes/dimen.; nodesize = 1

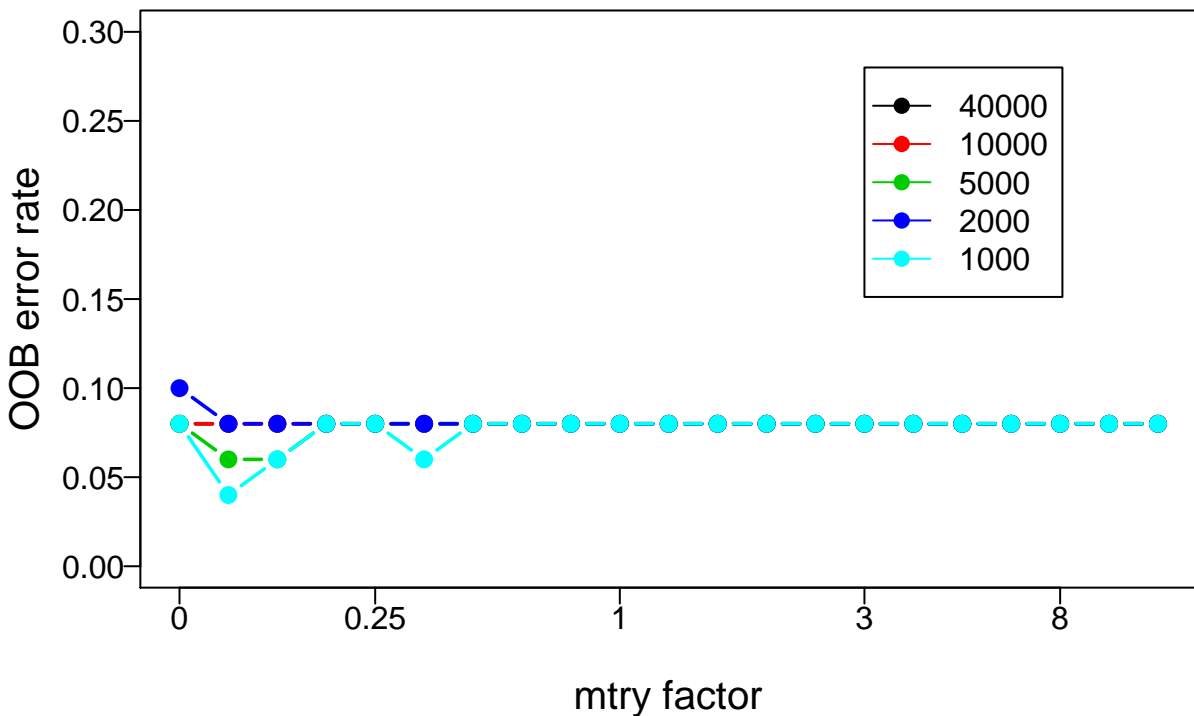

2 classes; 3 dimensions; 100 genes/dimen.; nodesize = 1

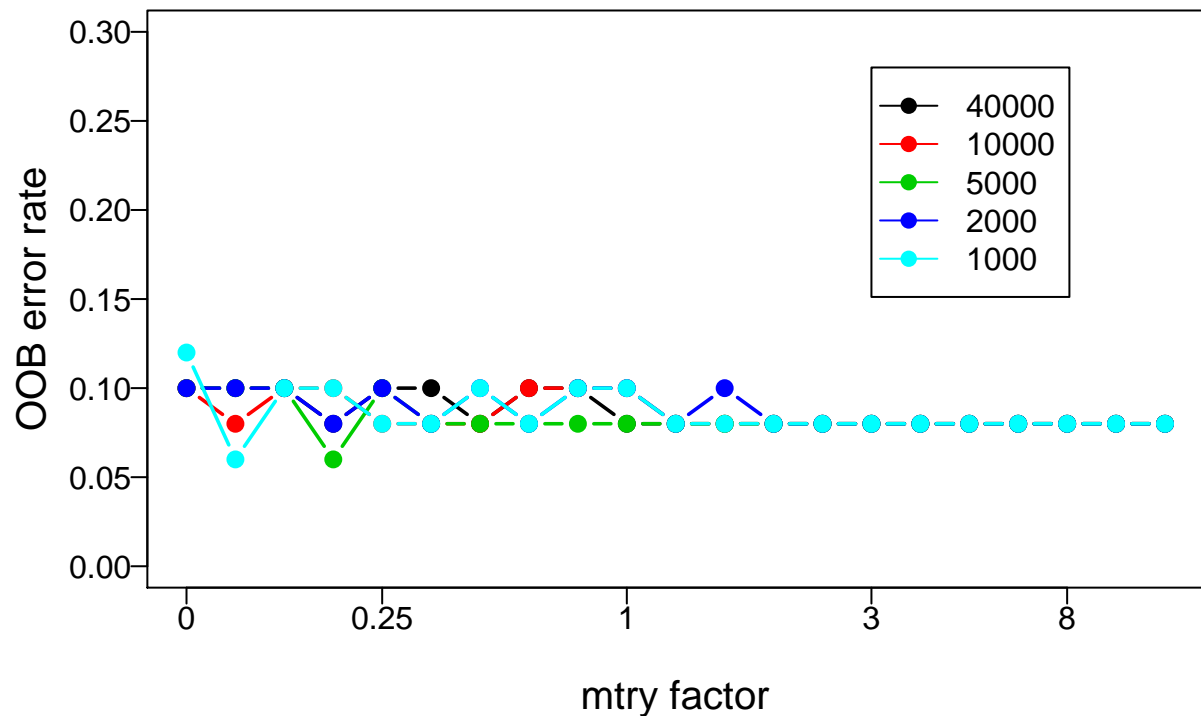

2 classes; 3 dimensions; 100 genes/dimen.; nodesize = 1

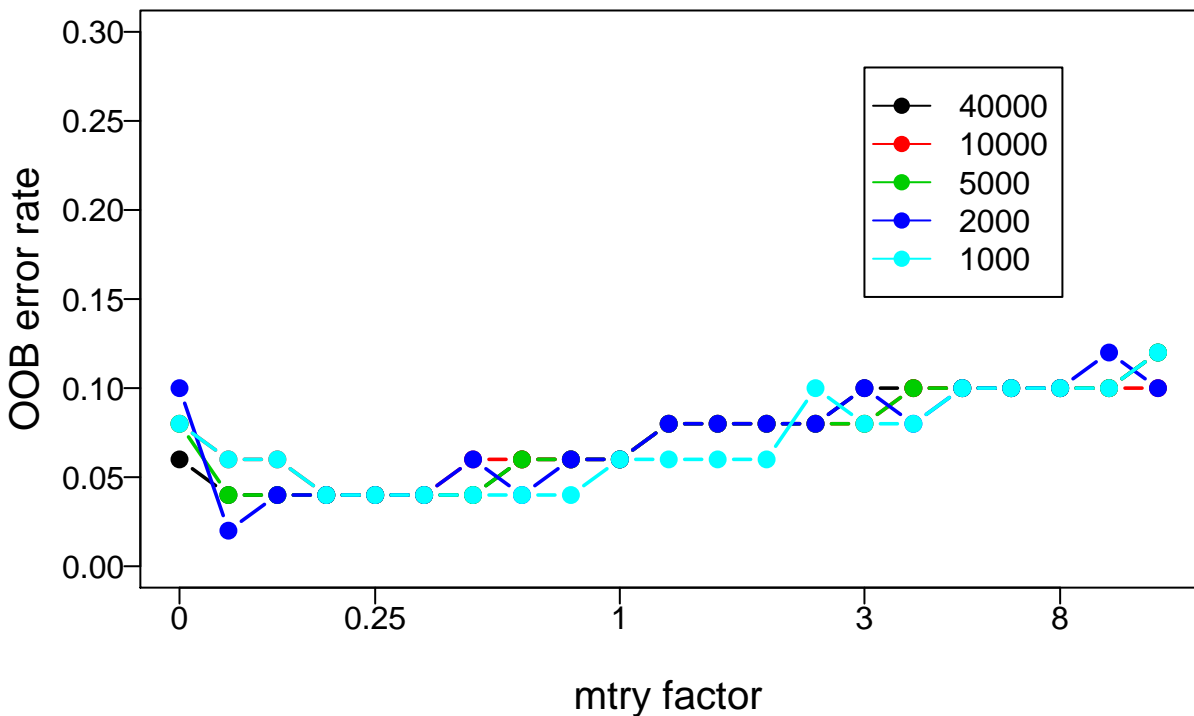

2 classes; 3 dimensions; 100 genes/dimen.; nodesize = 1

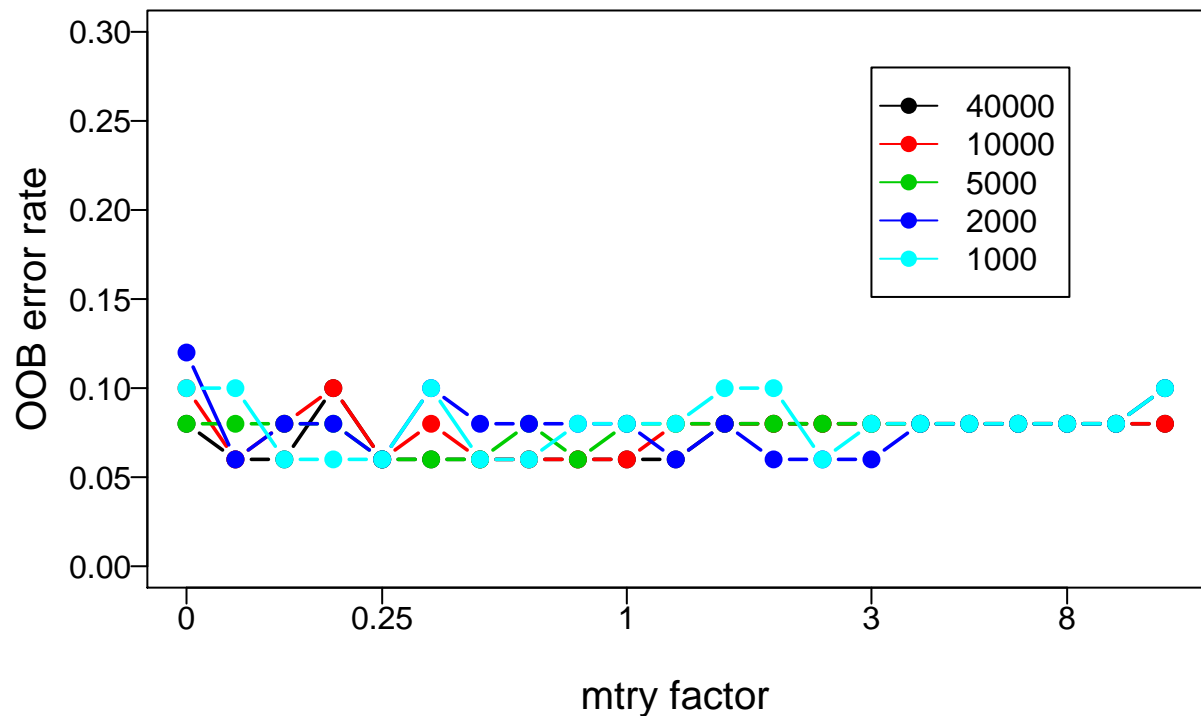

3 classes; 1 dimensions; 5 genes/dimen.; nodesize = 1

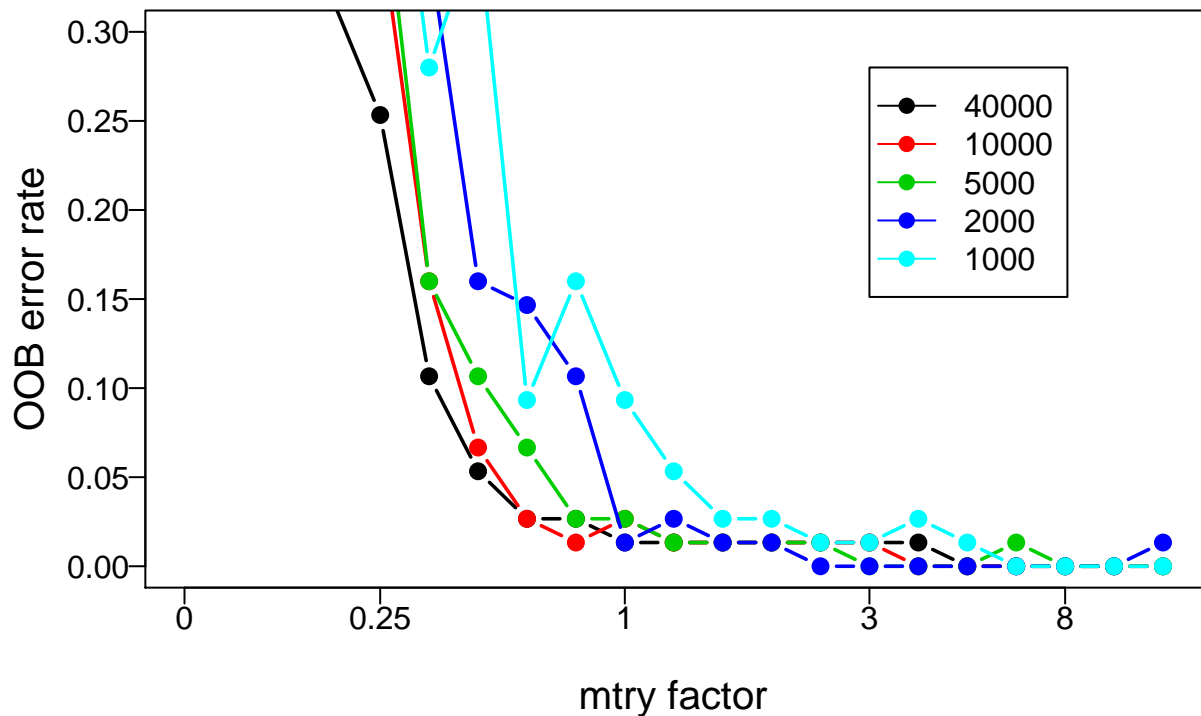

3 classes; 1 dimensions; 5 genes/dimen.; nodesize = 1

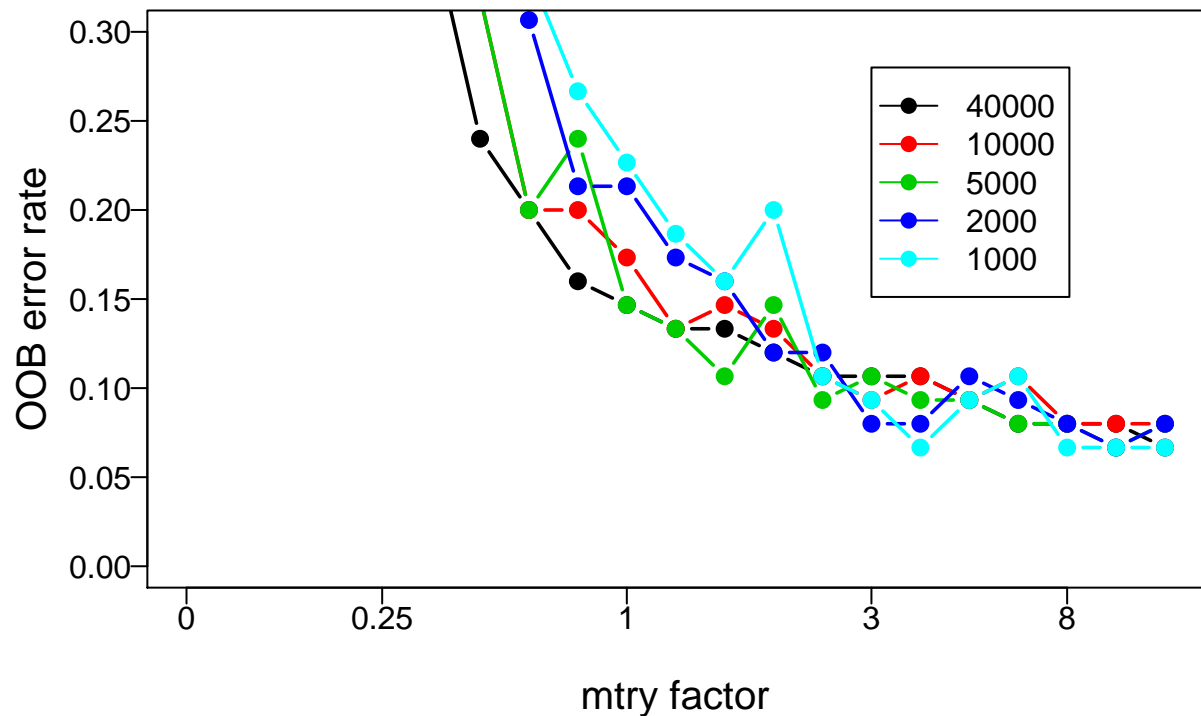

3 classes; 1 dimensions; 5 genes/dimen.; nodesize = 1

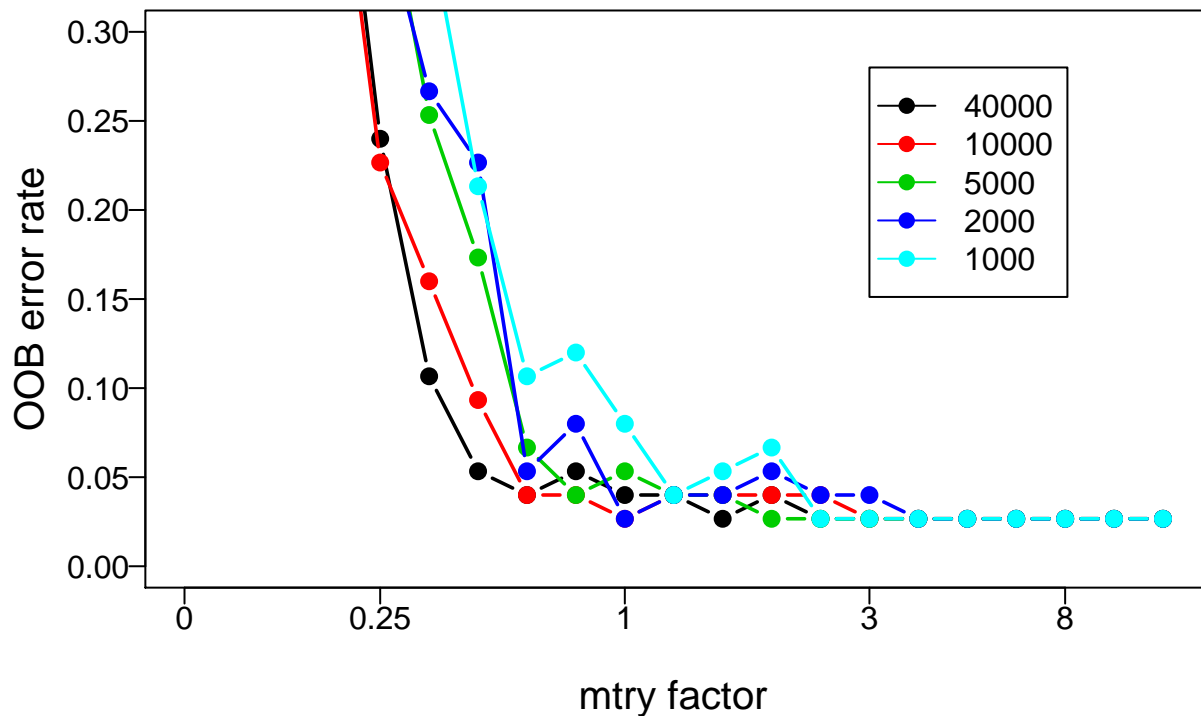

3 classes; 1 dimensions; 5 genes/dimen.; nodesize = 1

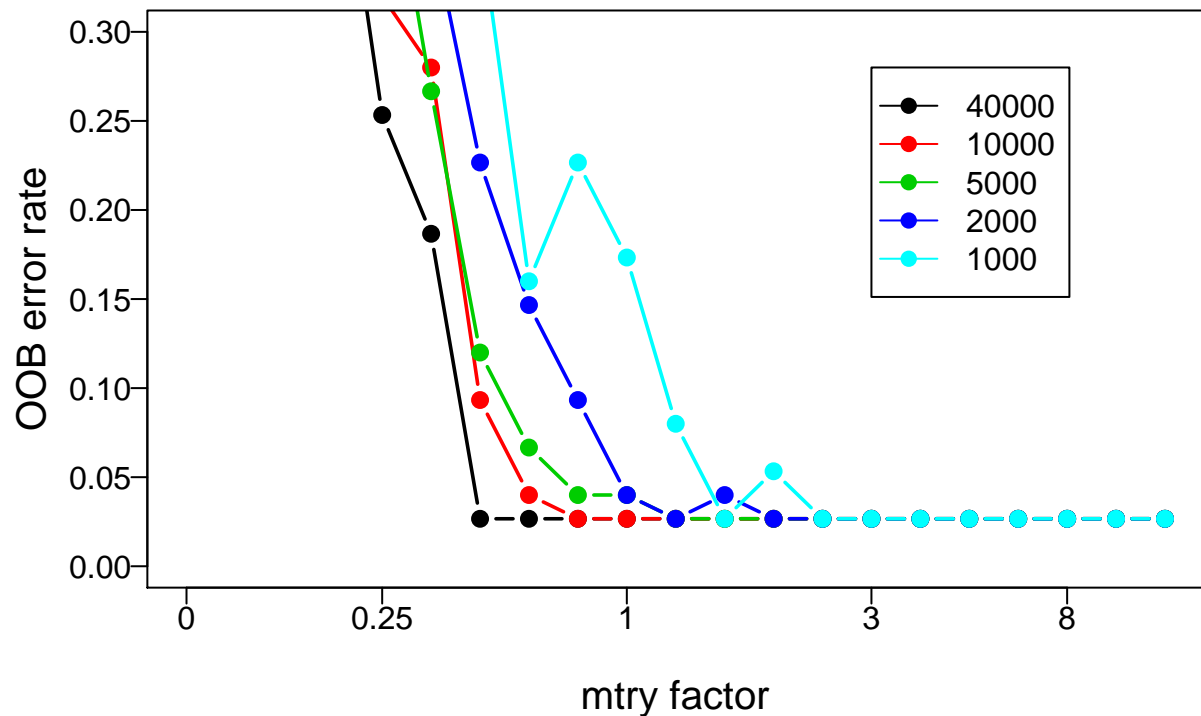

3 classes; 1 dimensions; 20 genes/dimen.; nodesize = 1

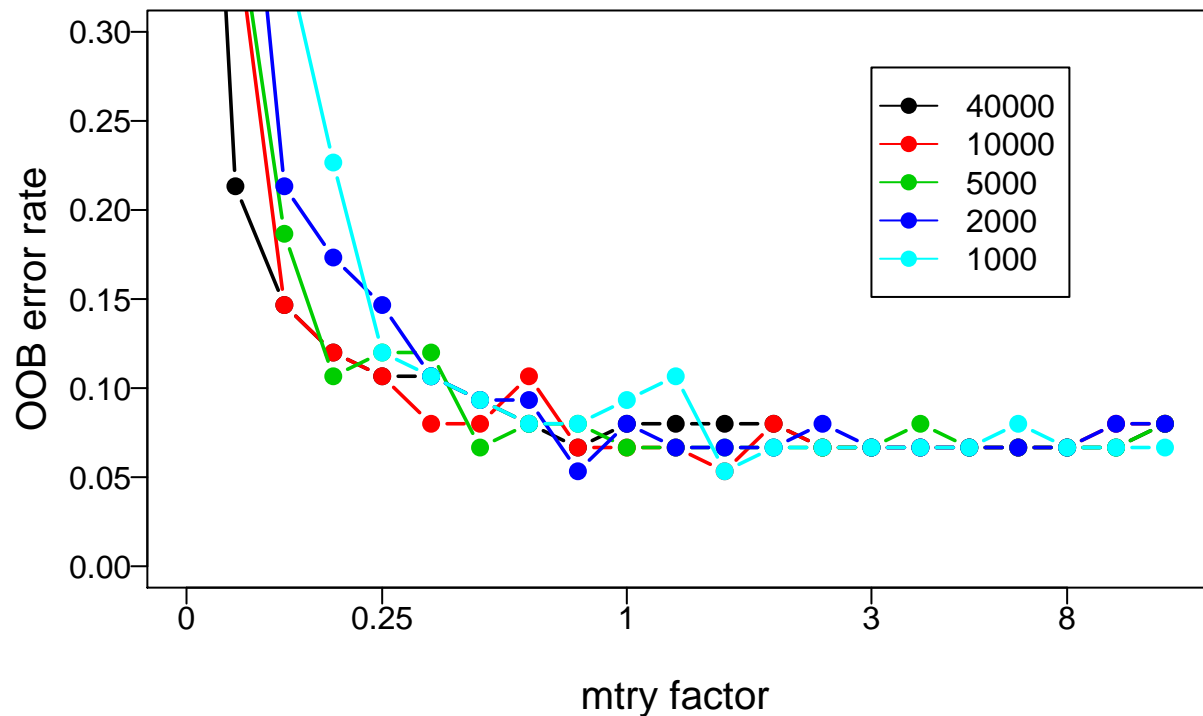

3 classes; 1 dimensions; 20 genes/dimen.; nodesize = 1

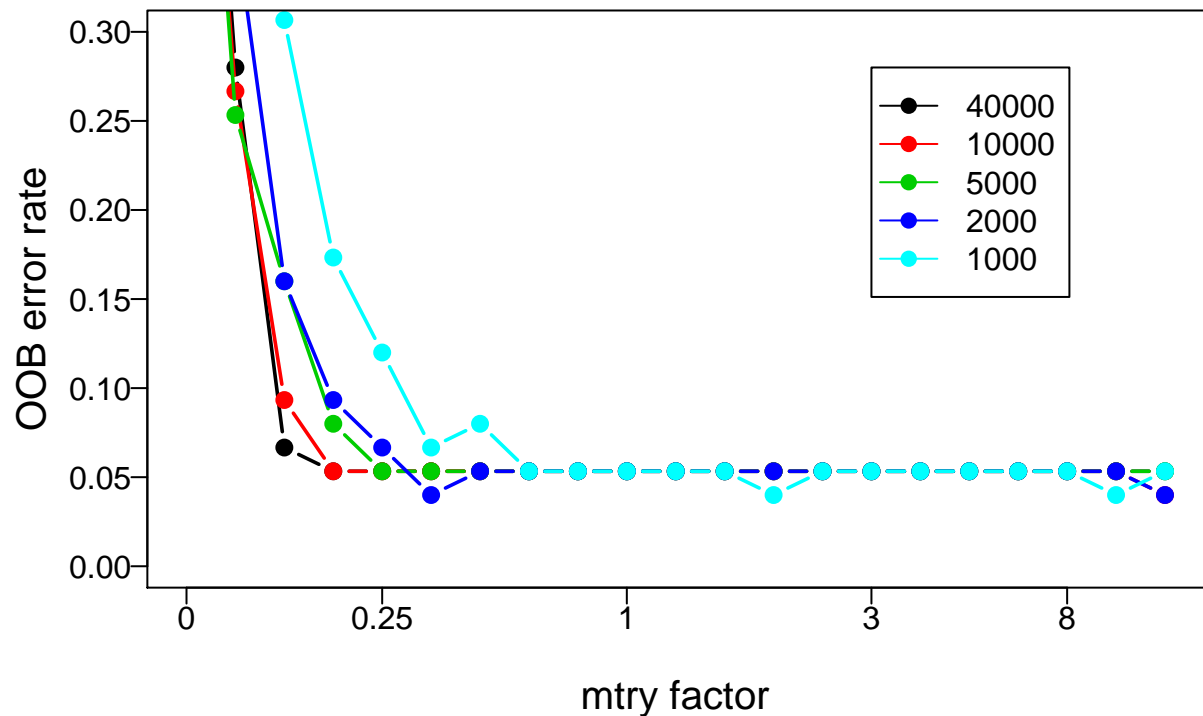

3 classes; 1 dimensions; 20 genes/dimen.; nodesize = 1

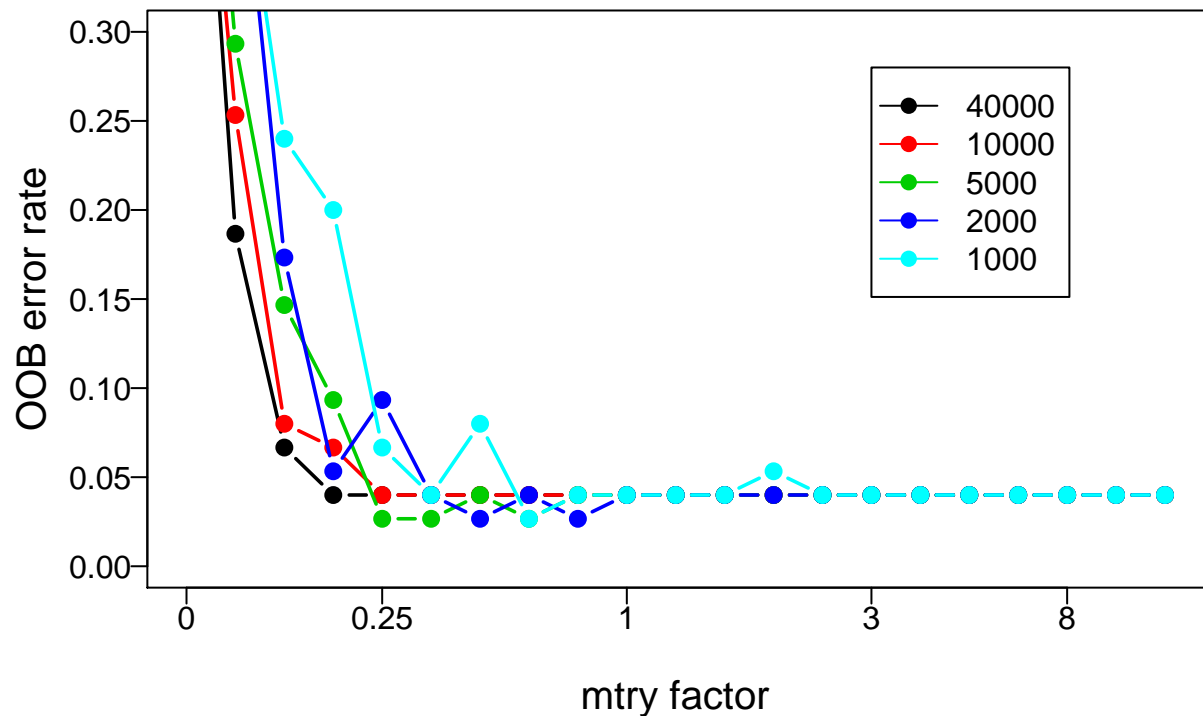

3 classes; 1 dimensions; 20 genes/dimen.; nodesize = 1

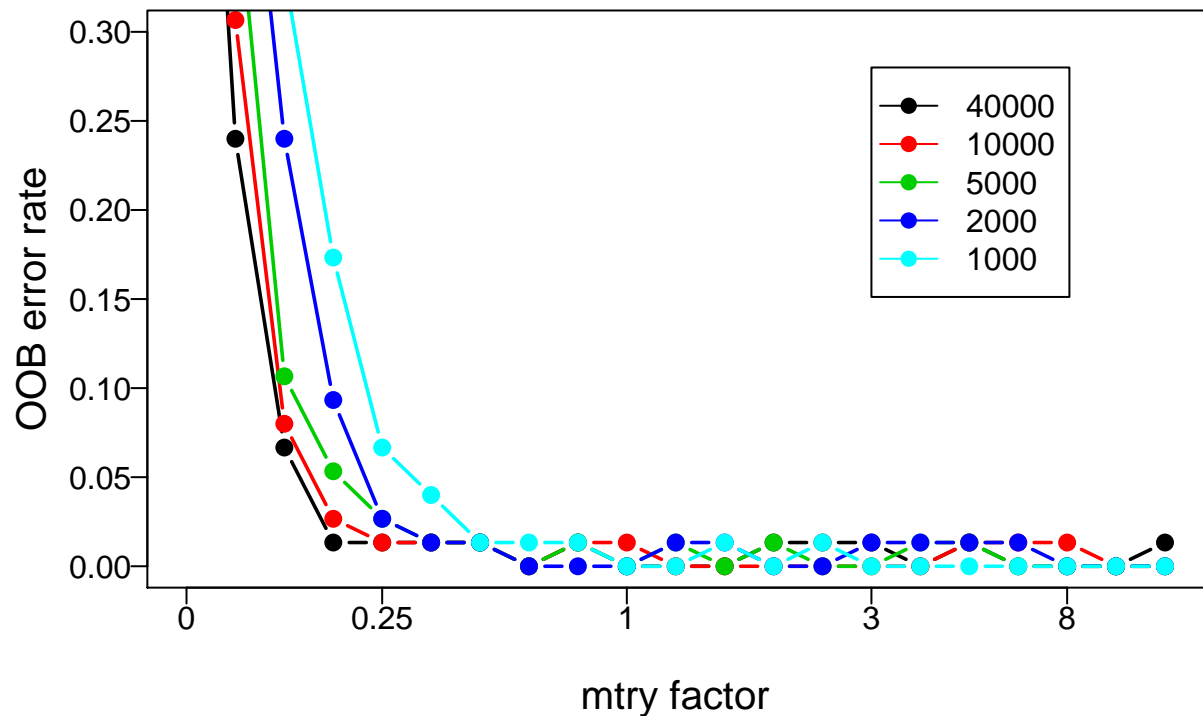

3 classes; 1 dimensions; 100 genes/dimen.; nodesize = 1

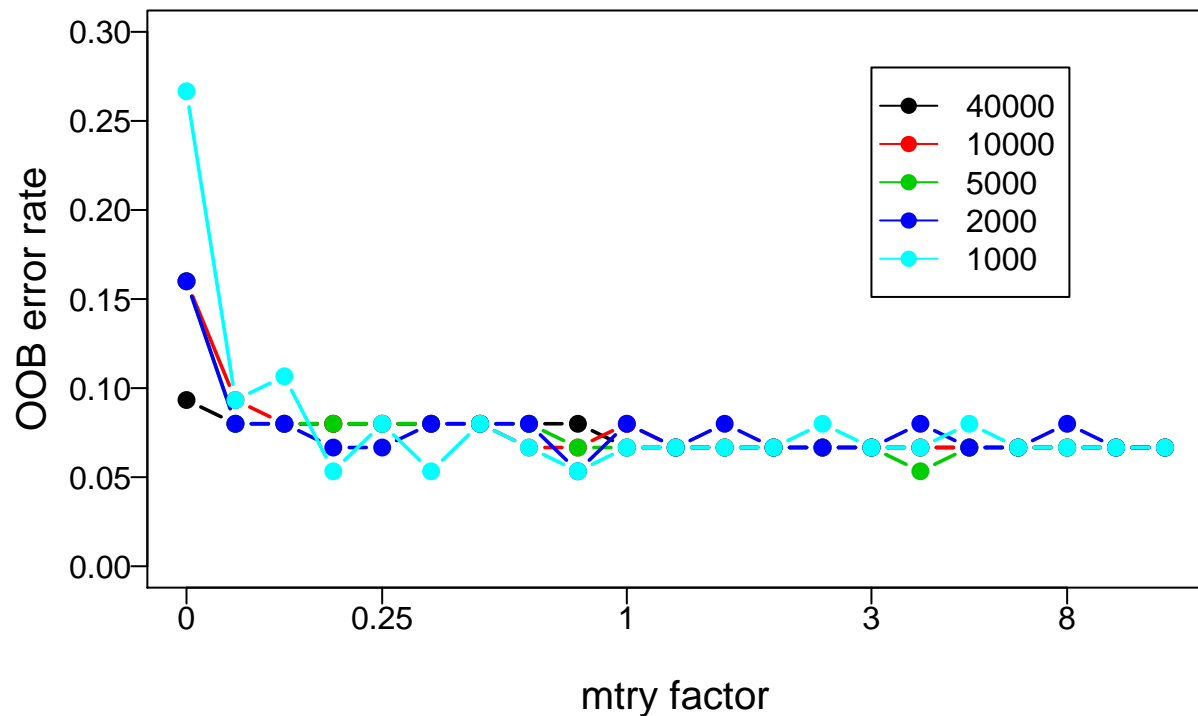

3 classes; 1 dimensions; 100 genes/dimen.; nodesize = 1

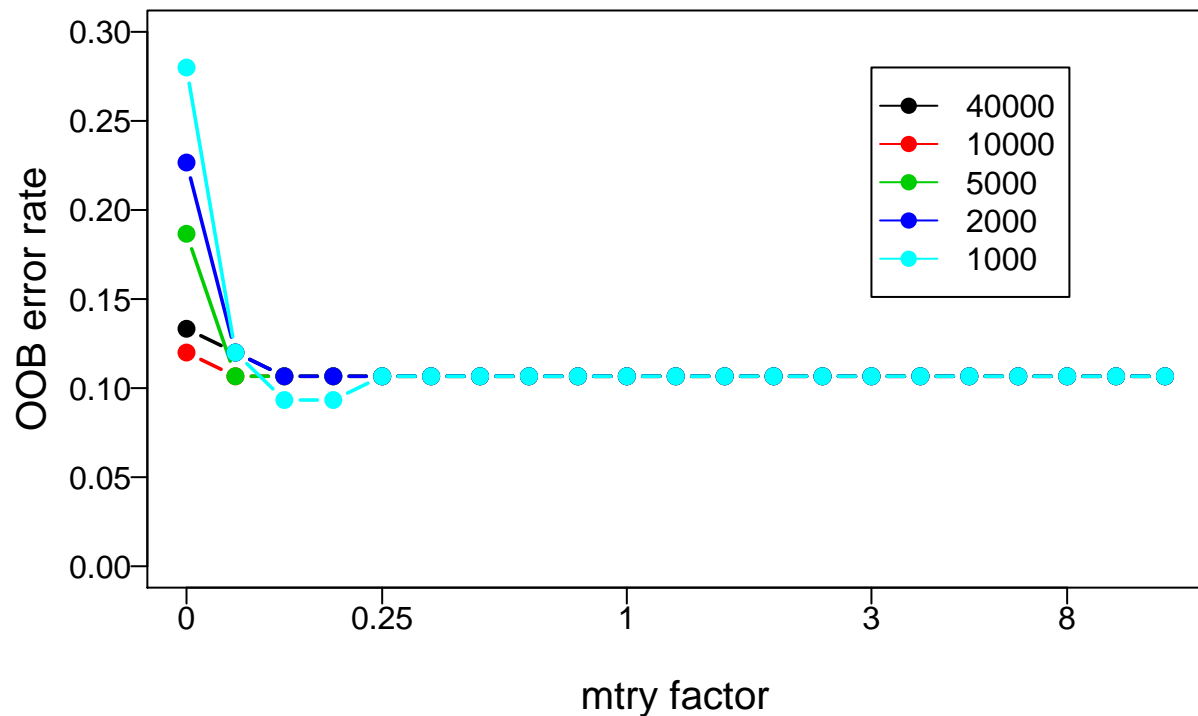

3 classes; 1 dimensions; 100 genes/dimen.; nodesize = 1

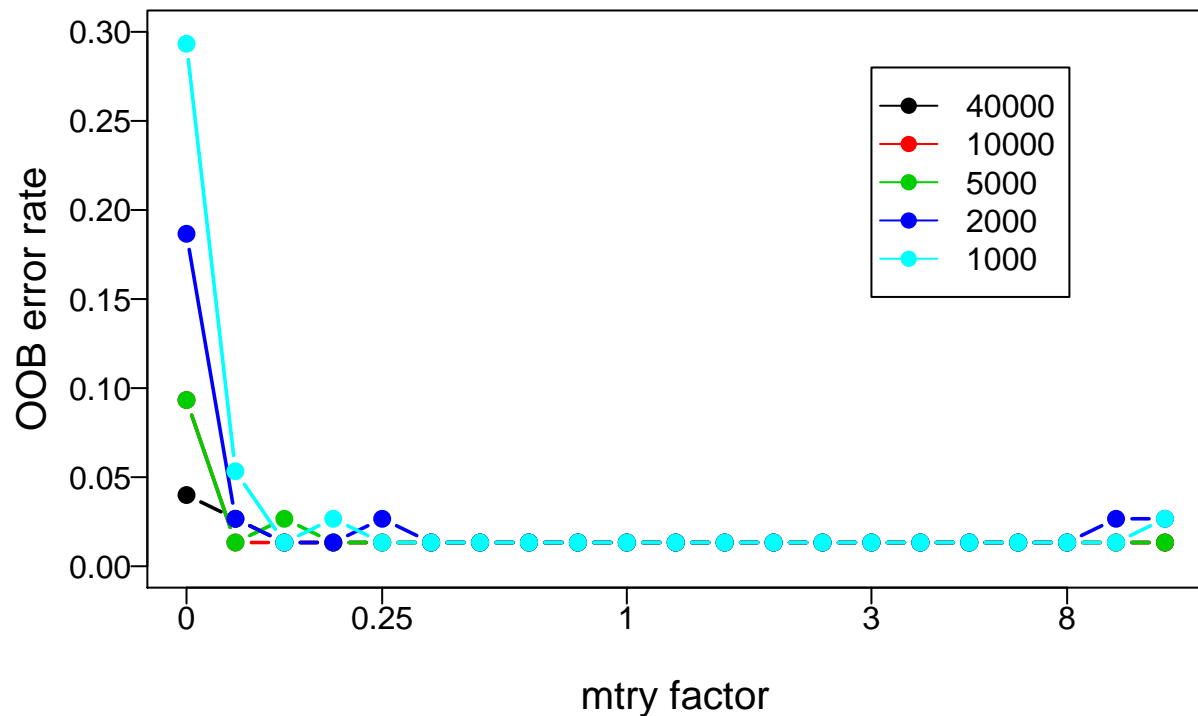

3 classes; 1 dimensions; 100 genes/dimen.; nodesize = 1

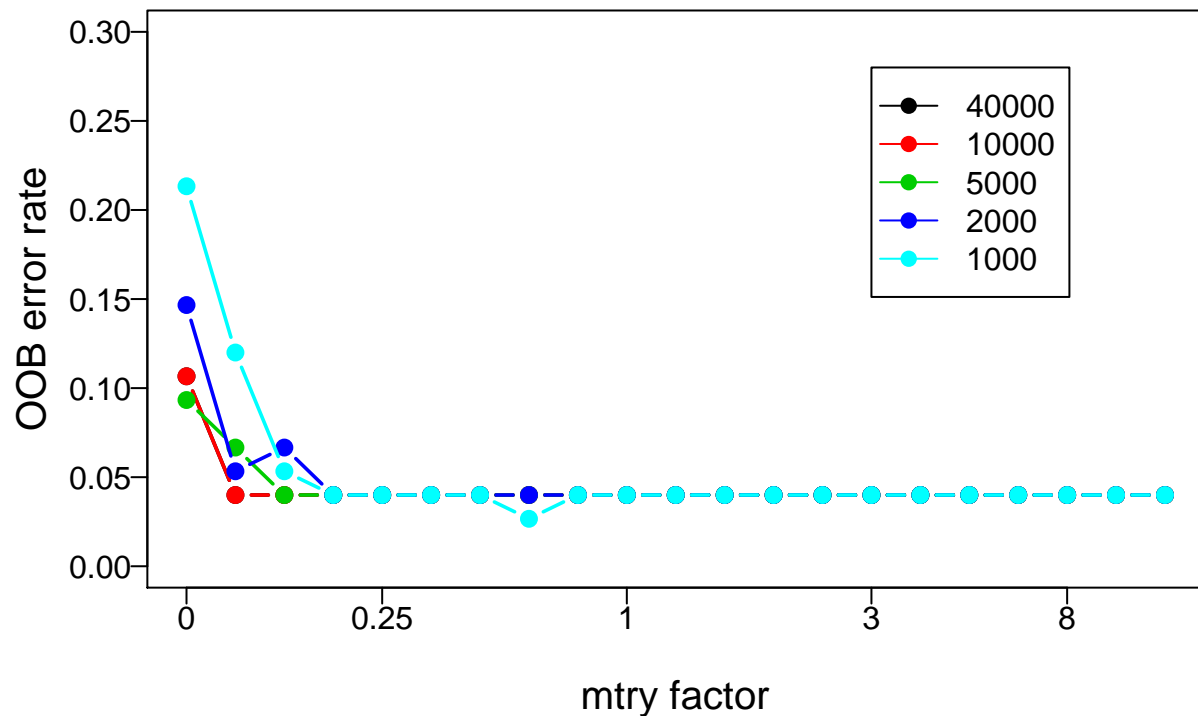

3 classes; 2 dimensions; 5 genes/dimen.; nodesize = 1

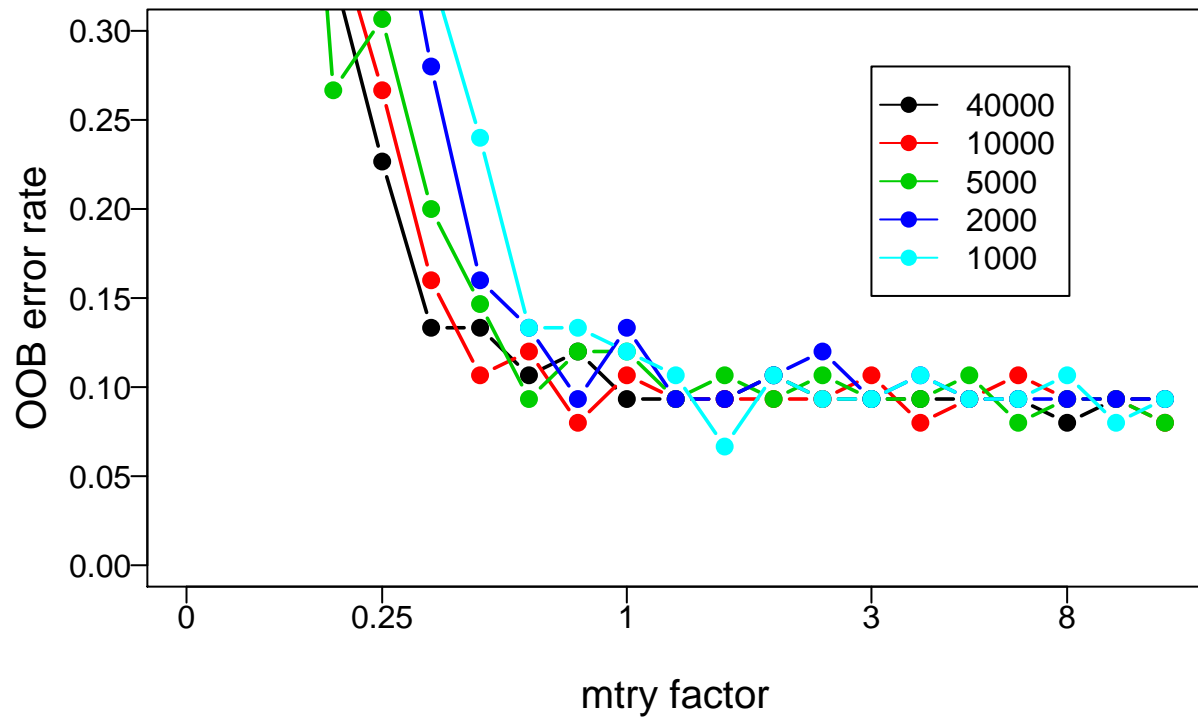

3 classes; 2 dimensions; 5 genes/dimen.; nodesize = 1

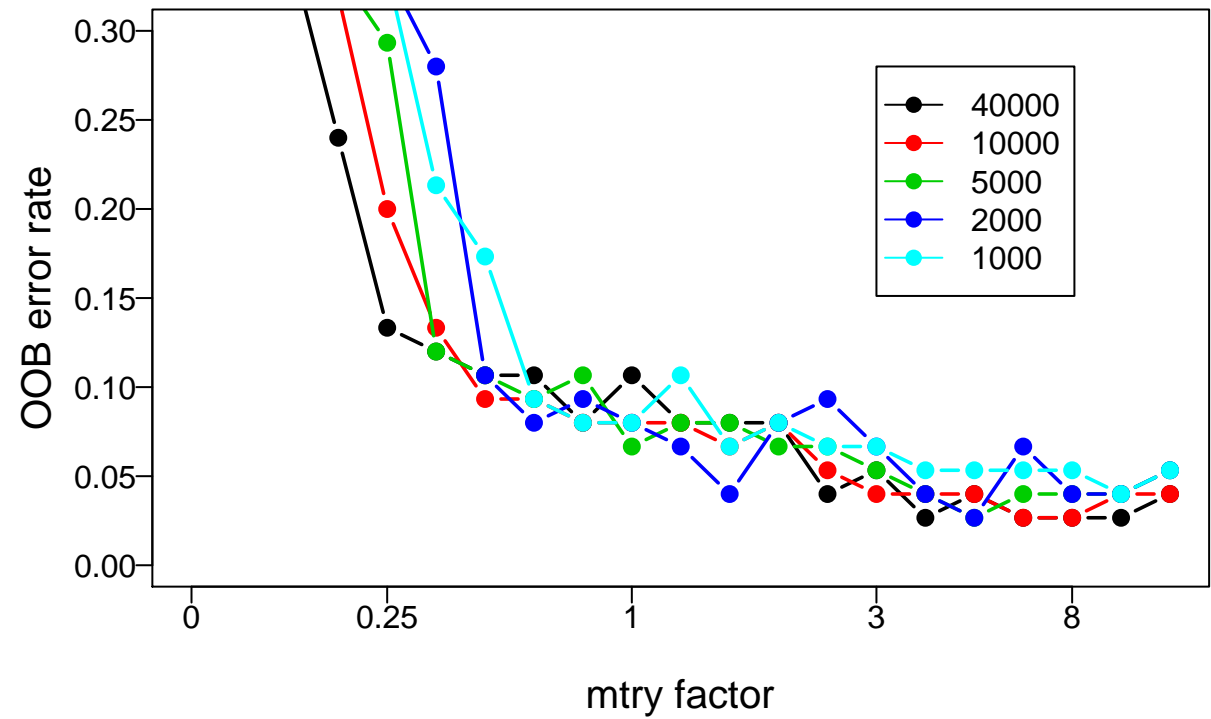

3 classes; 2 dimensions; 5 genes/dimen.; nodesize = 1

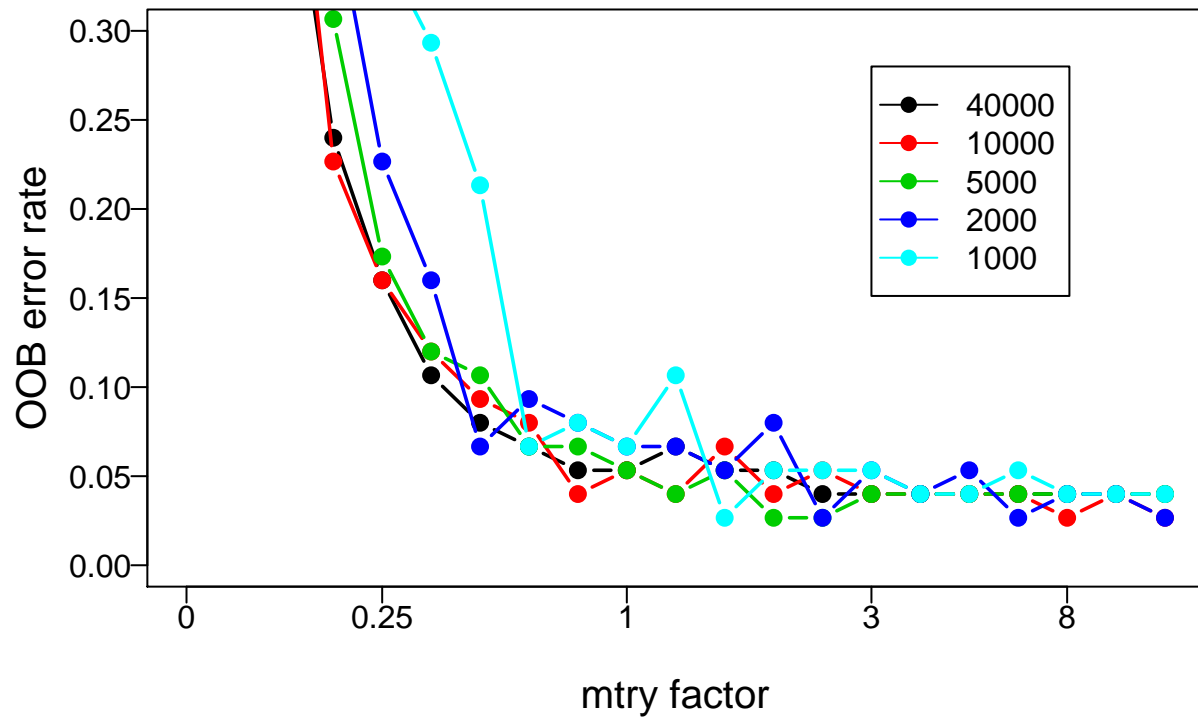

3 classes; 2 dimensions; 5 genes/dimen.; nodesize = 1

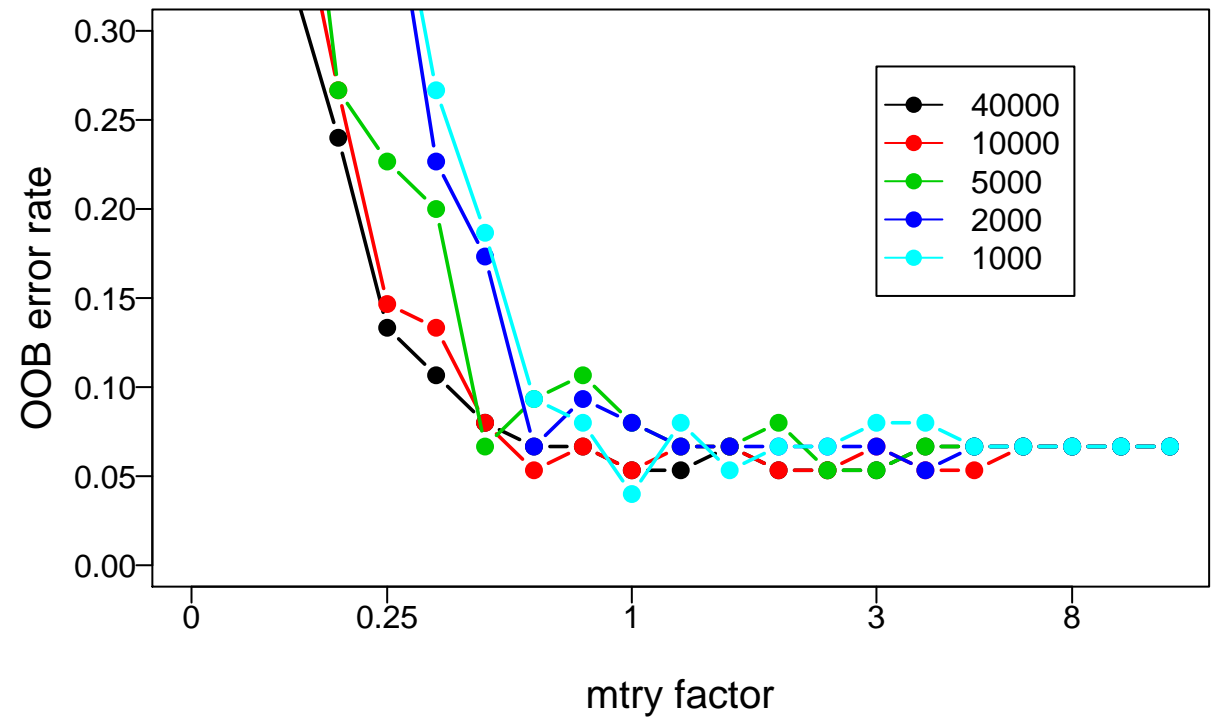

3 classes; 2 dimensions; 20 genes/dimen.; nodesize = 1

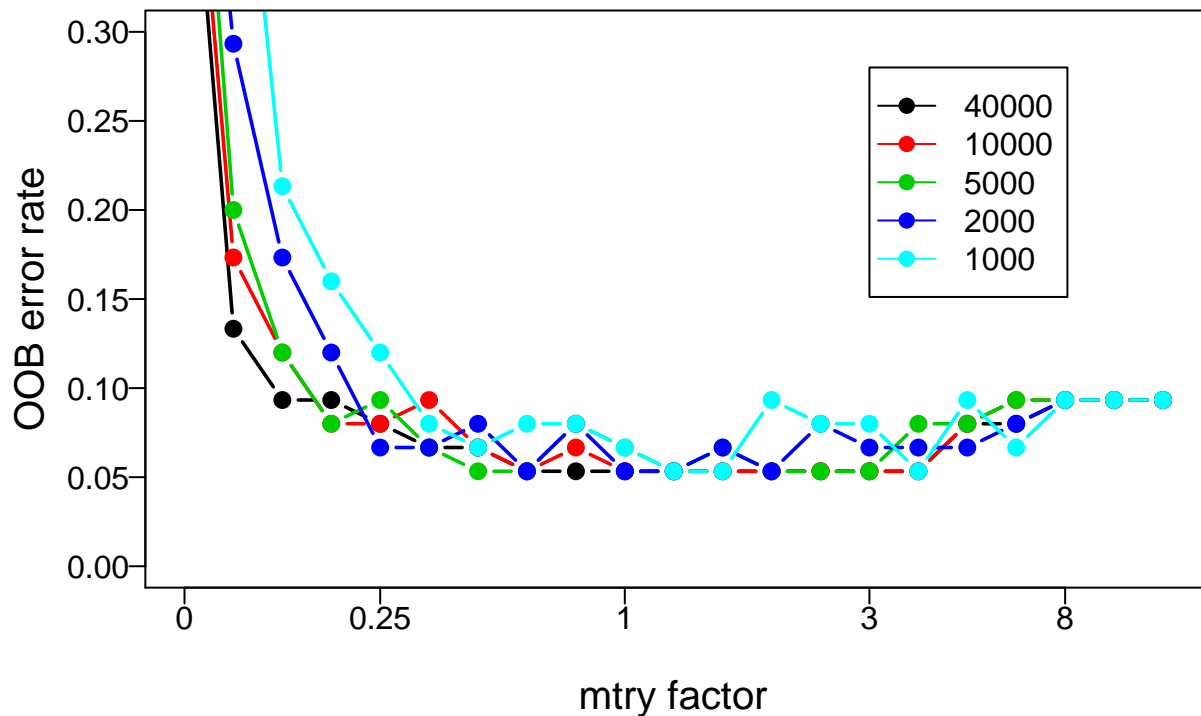

3 classes; 2 dimensions; 20 genes/dimen.; nodesize = 1

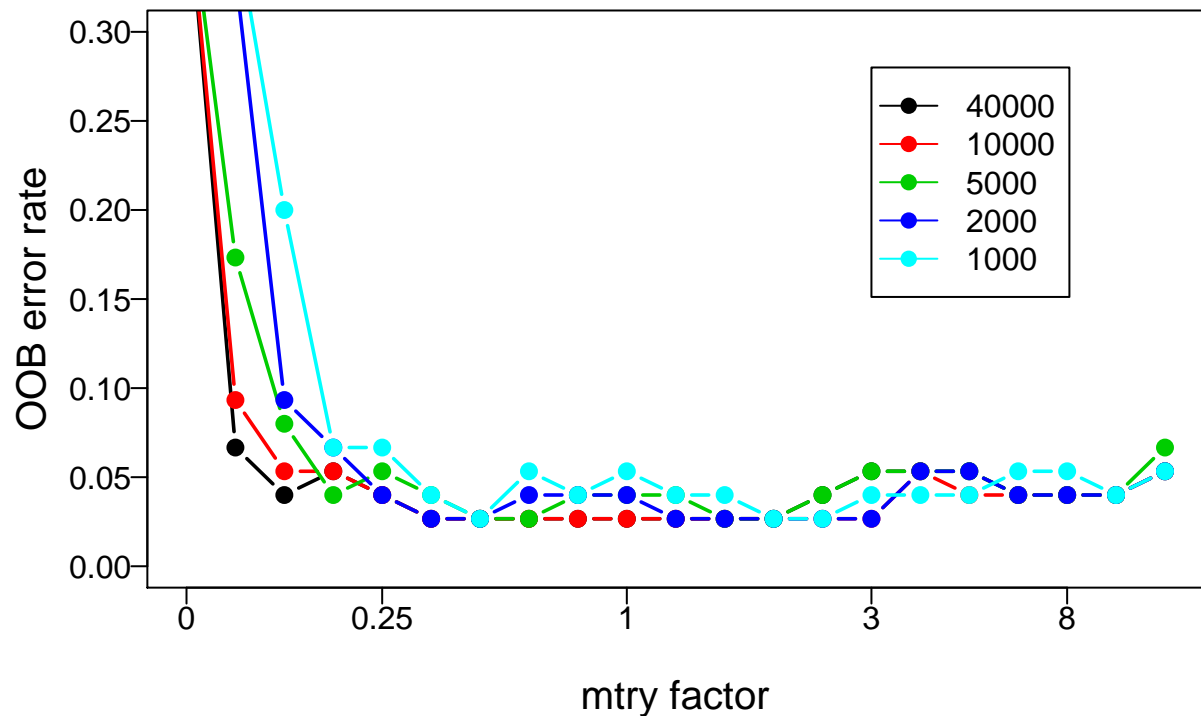

3 classes; 2 dimensions; 20 genes/dimen.; nodesize = 1

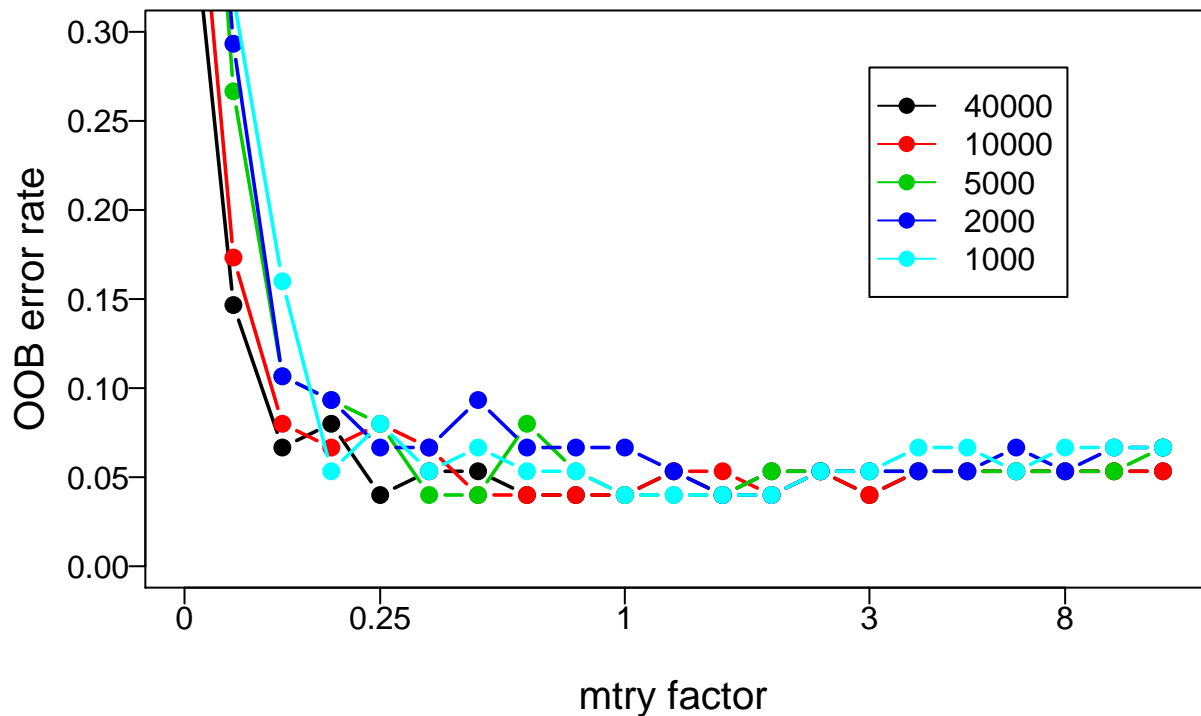

3 classes; 2 dimensions; 20 genes/dimen.; nodesize = 1

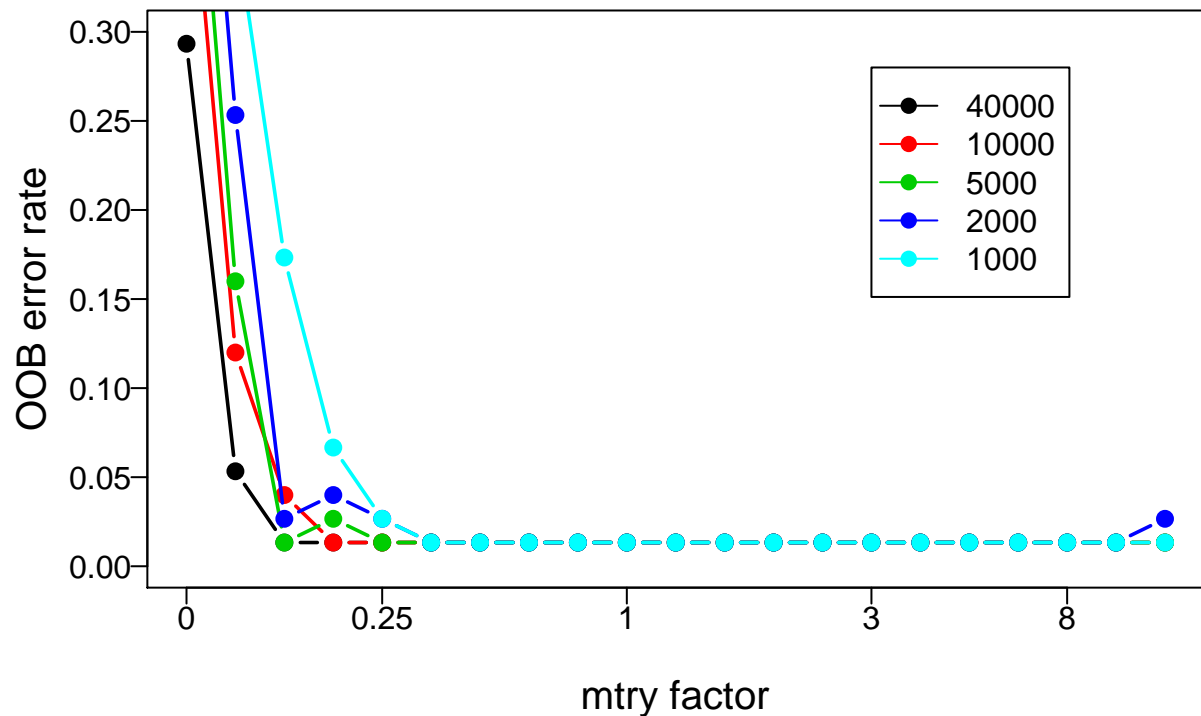

3 classes; 2 dimensions; 100 genes/dimen.; nodesize = 1

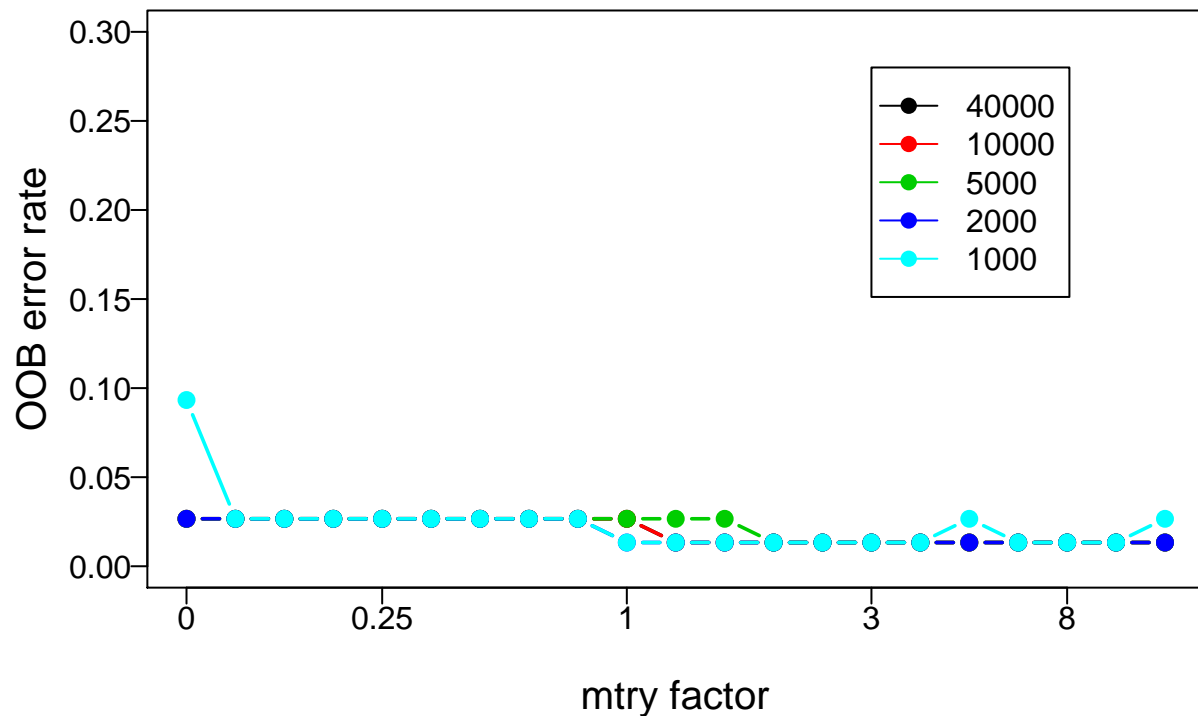

3 classes; 2 dimensions; 100 genes/dimen.; nodesize = 1

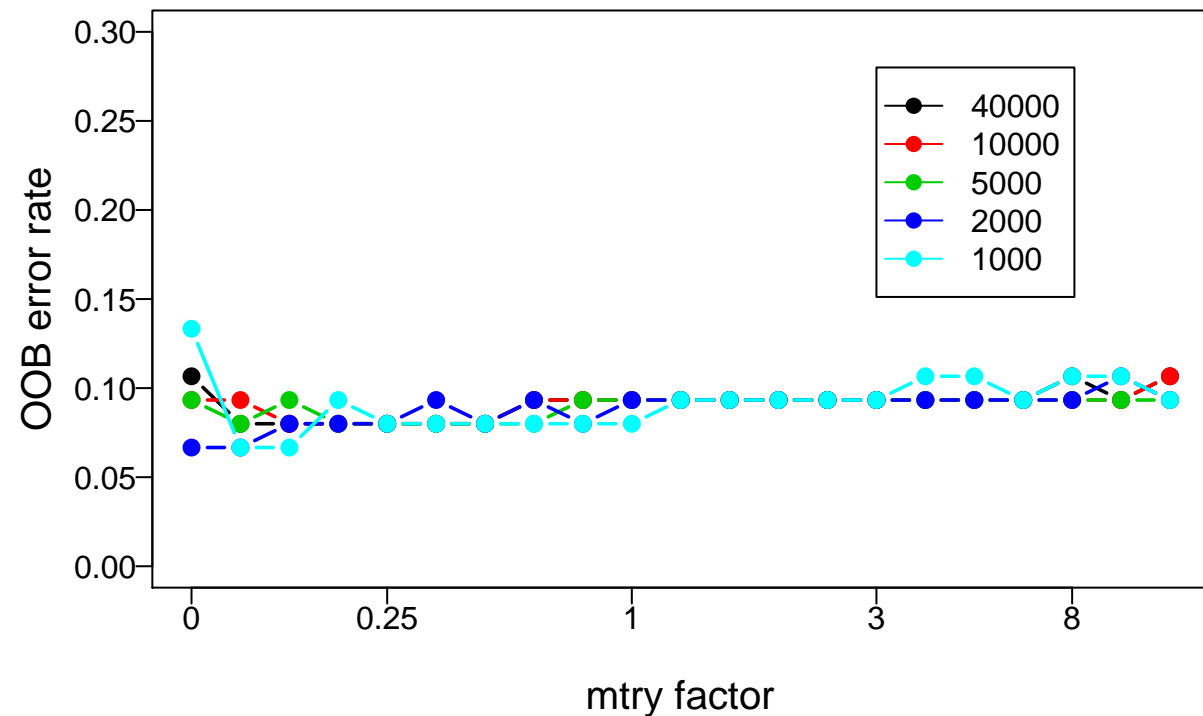

3 classes; 2 dimensions; 100 genes/dimen.; nodesize = 1

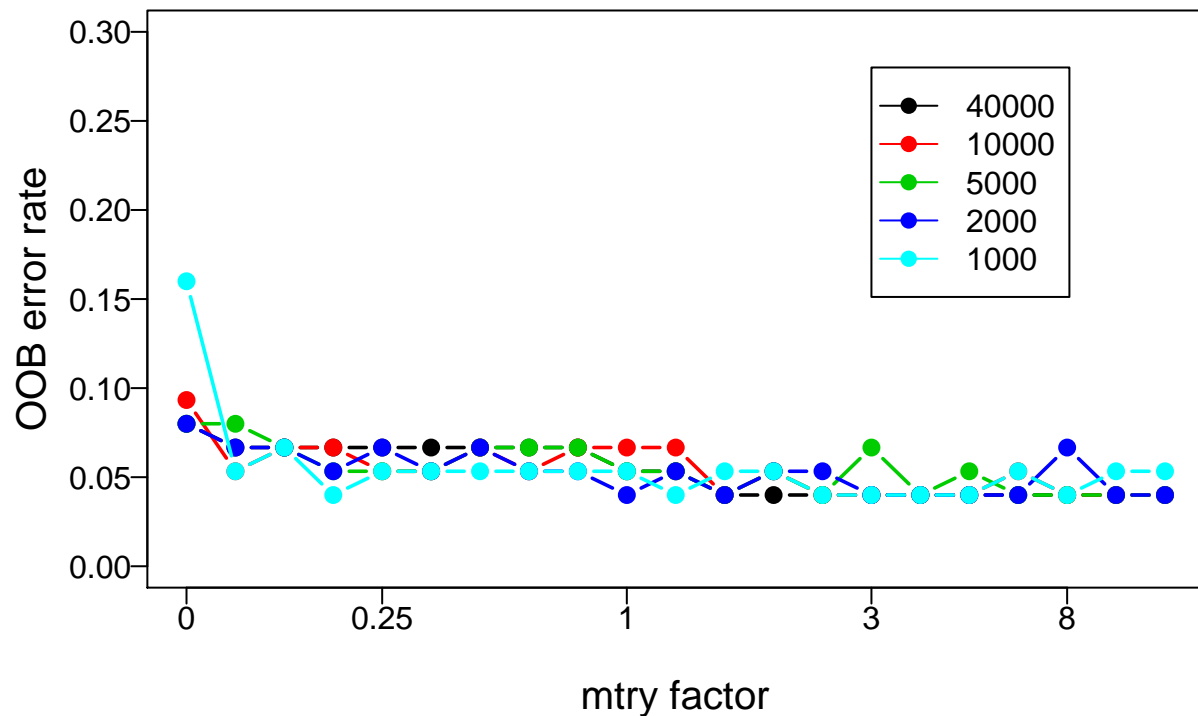

3 classes; 2 dimensions; 100 genes/dimen.; nodesize = 1

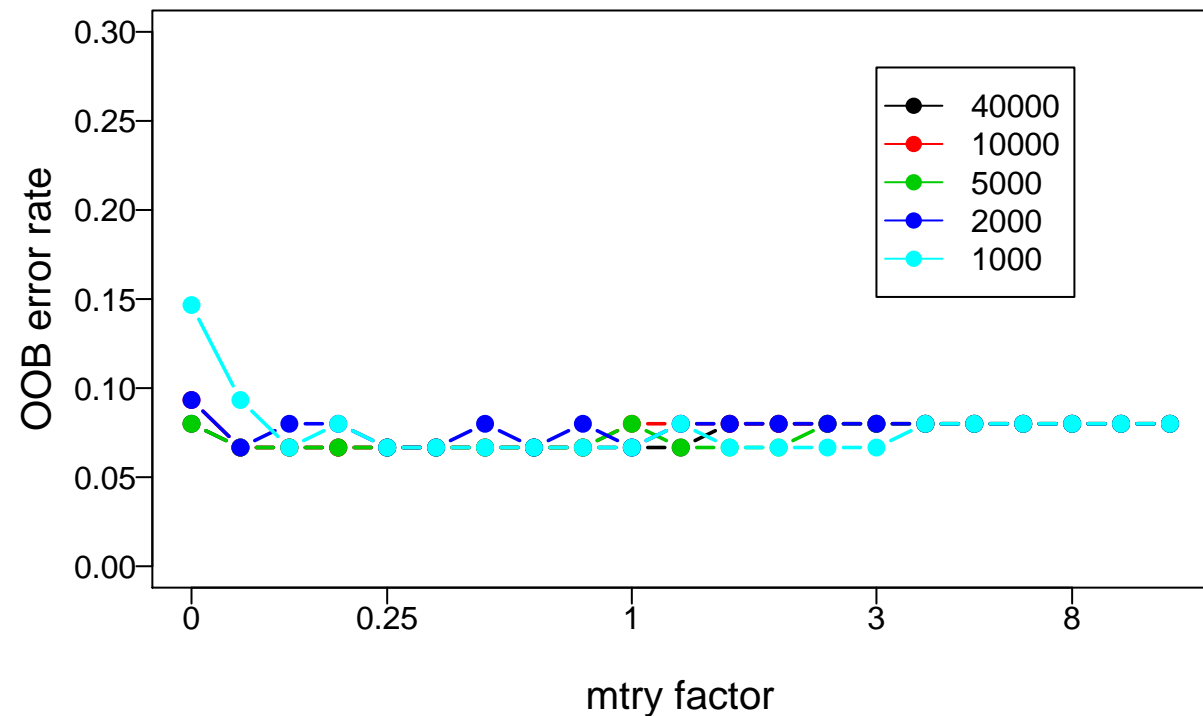



3 classes; 3 dimensions; 5 genes/dimen.; nodesize = 1

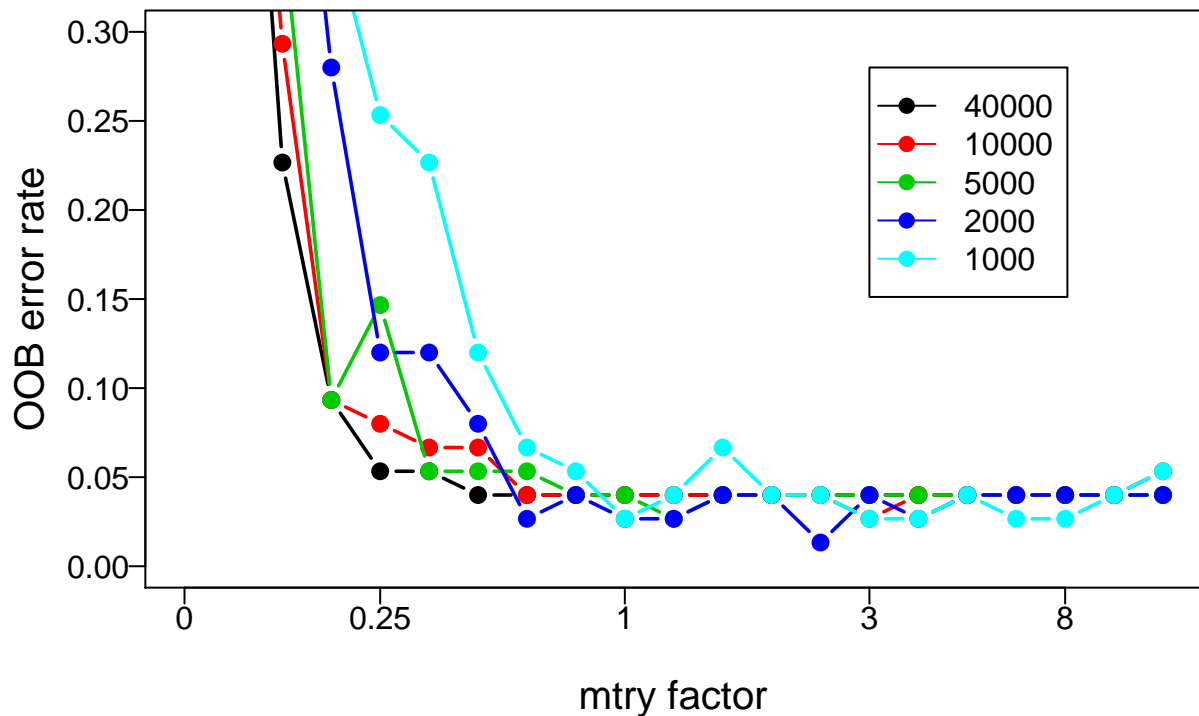

3 classes; 3 dimensions; 5 genes/dimen.; nodesize = 1

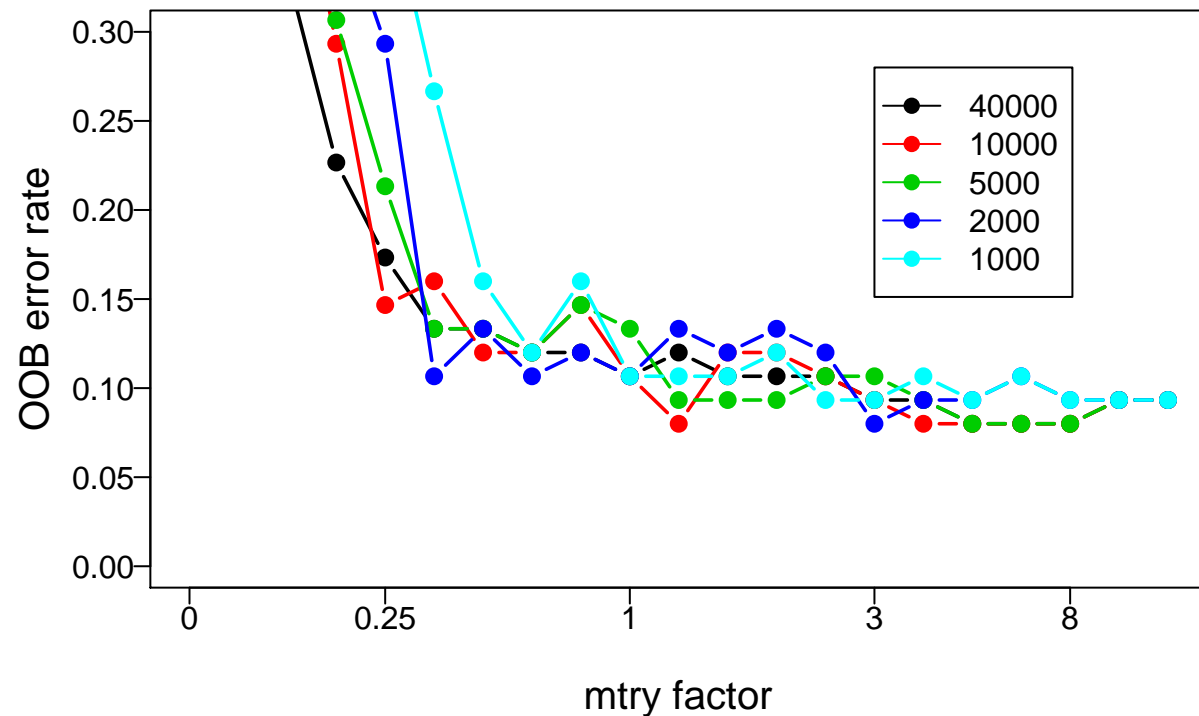

3 classes; 3 dimensions; 5 genes/dimen.; nodesize = 1

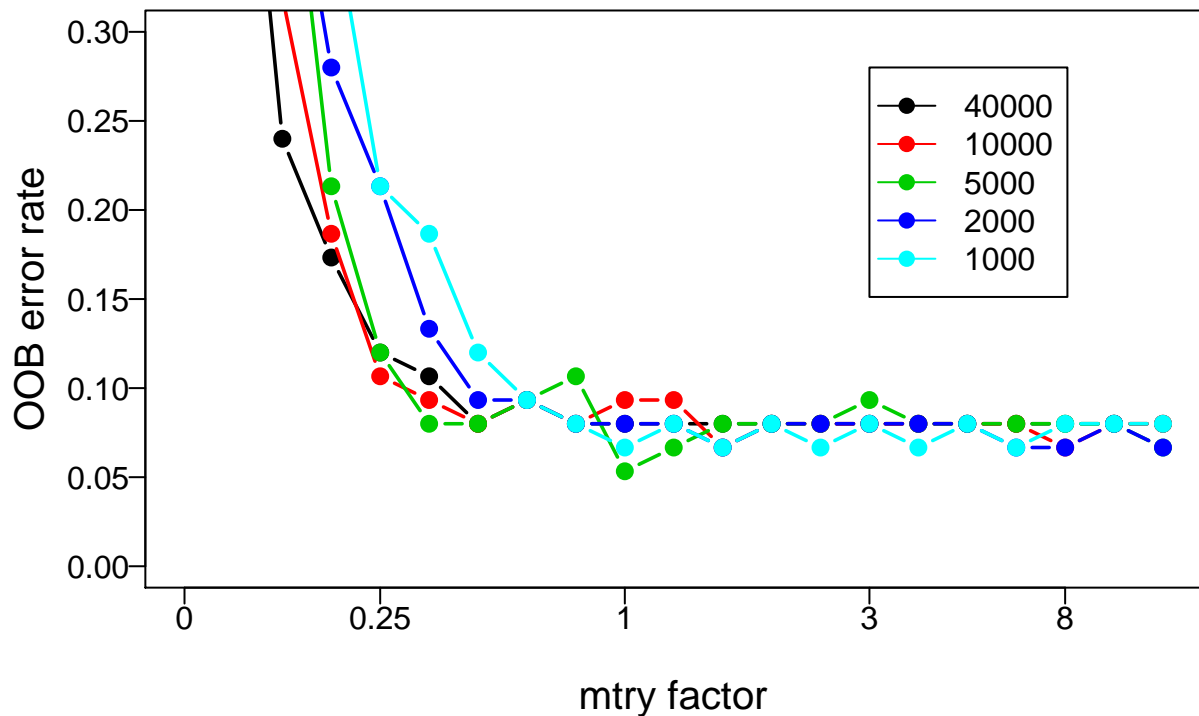

3 classes; 3 dimensions; 5 genes/dimen.; nodesize = 1

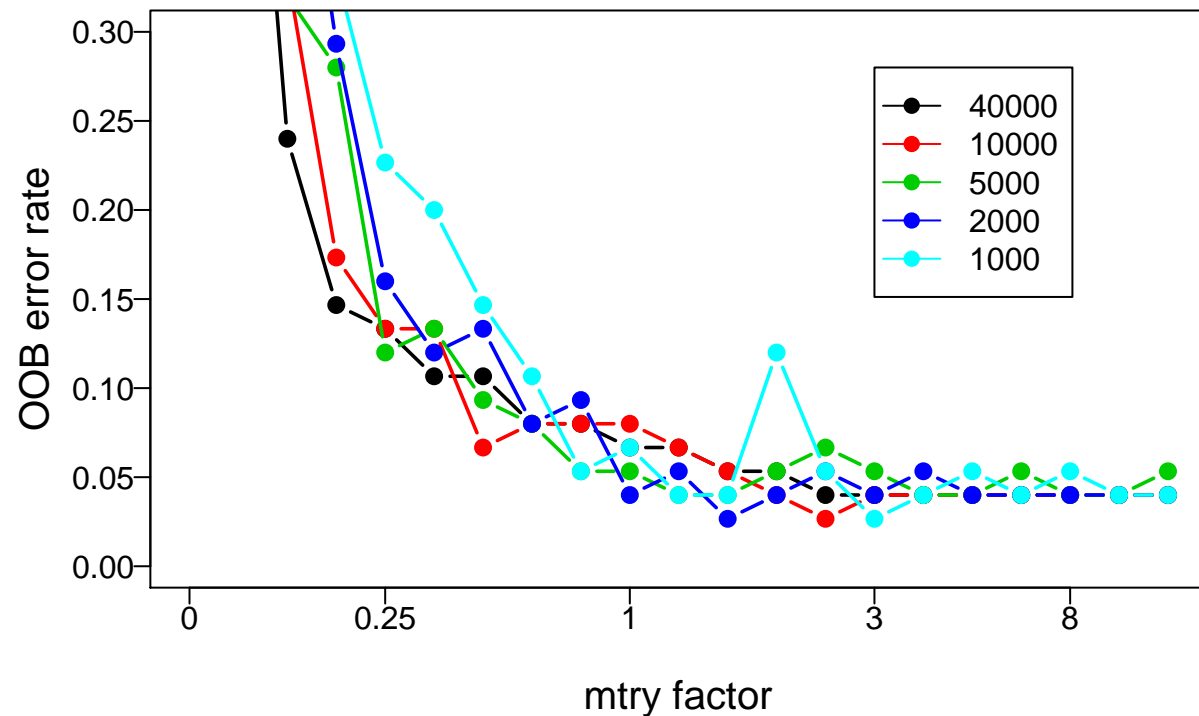

3 classes; 3 dimensions; 20 genes/dimen.; nodesize = 1

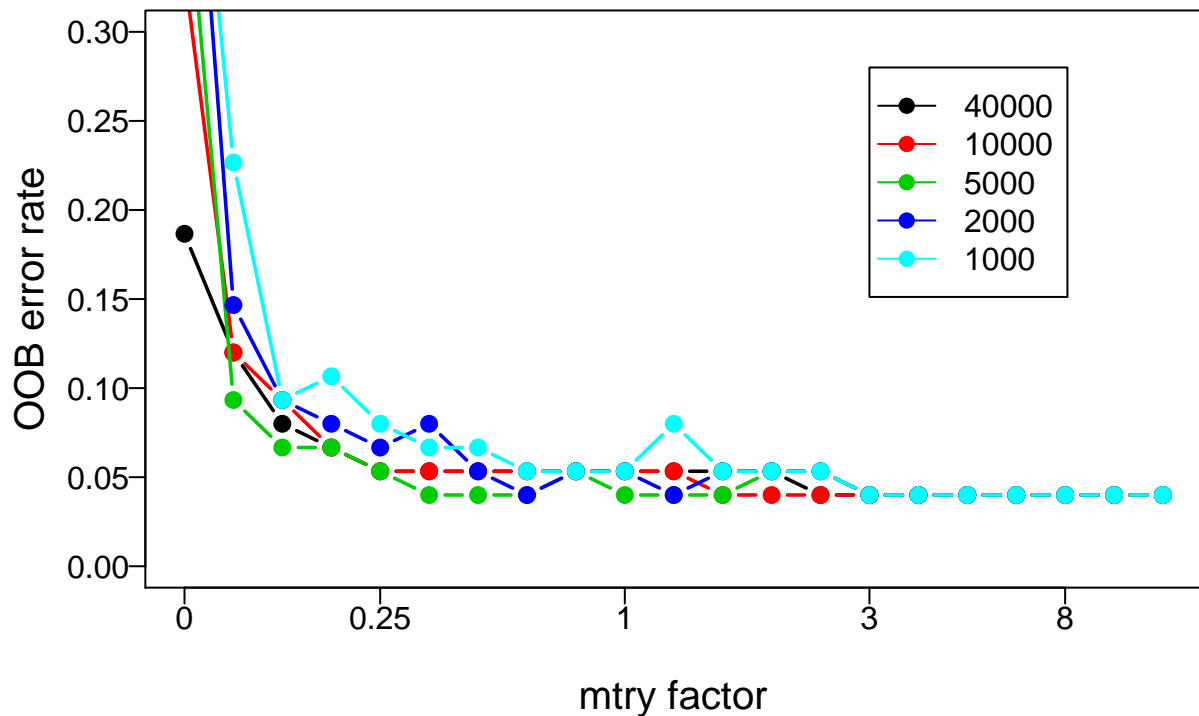

3 classes; 3 dimensions; 20 genes/dimen.; nodesize = 1

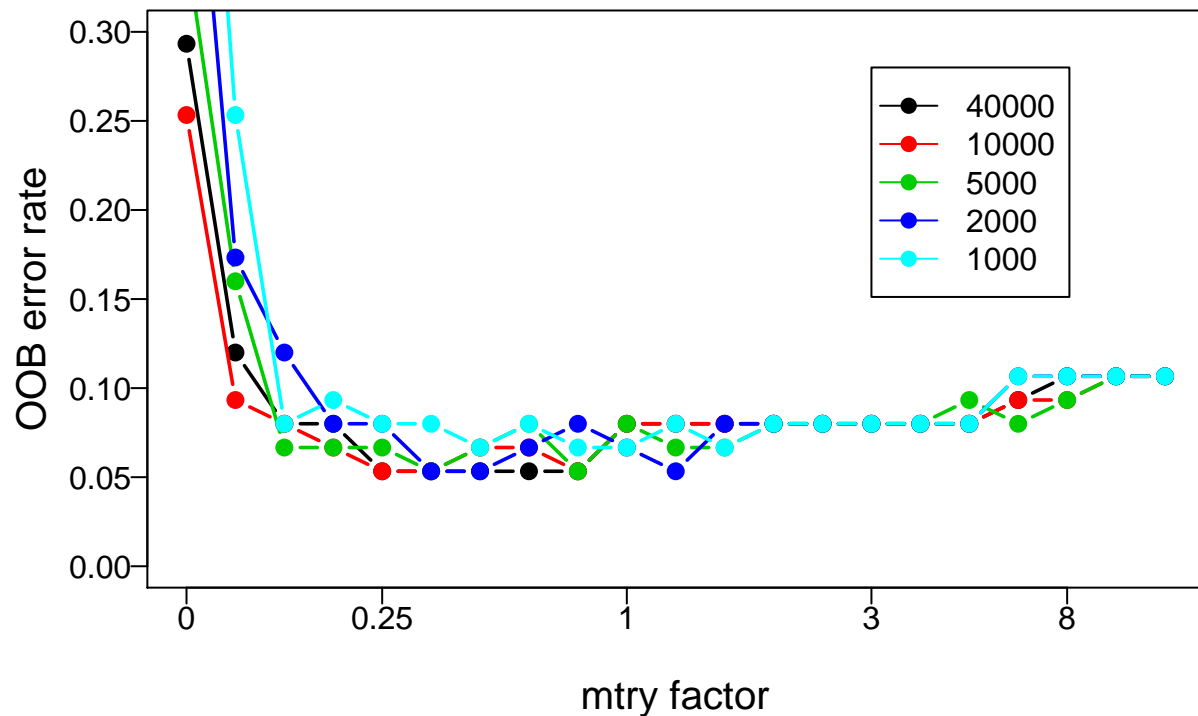

3 classes; 3 dimensions; 20 genes/dimen.; nodesize = 1

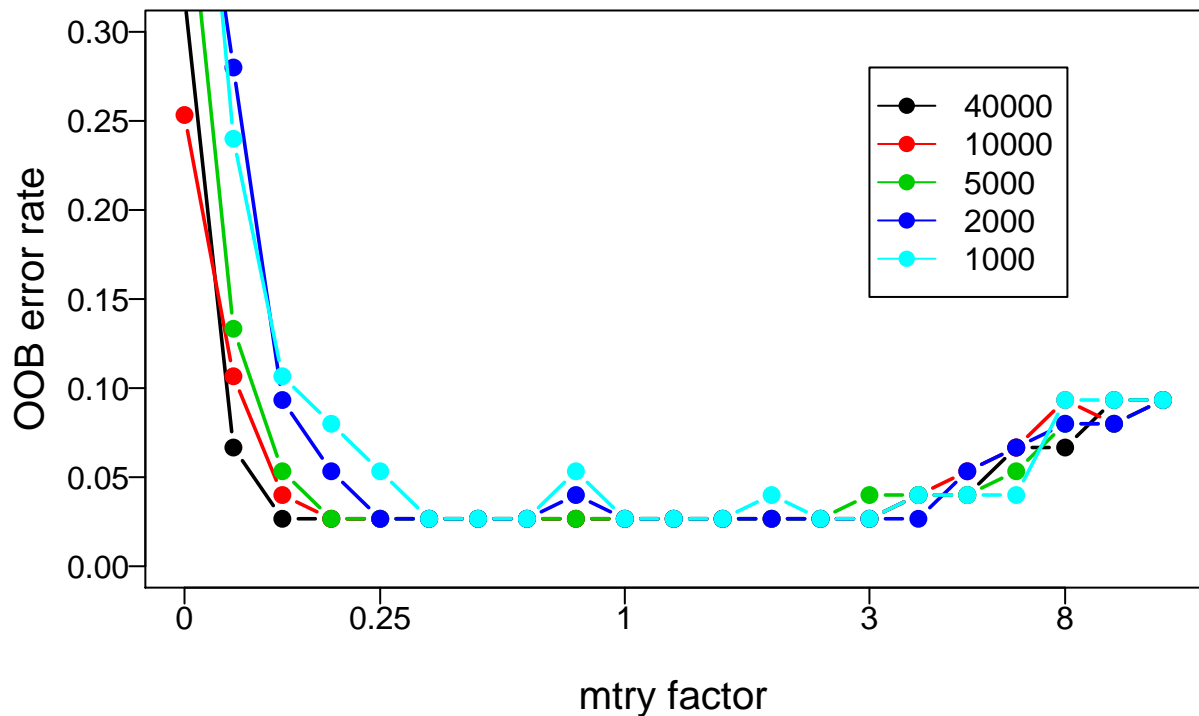

3 classes; 3 dimensions; 20 genes/dimen.; nodesize = 1

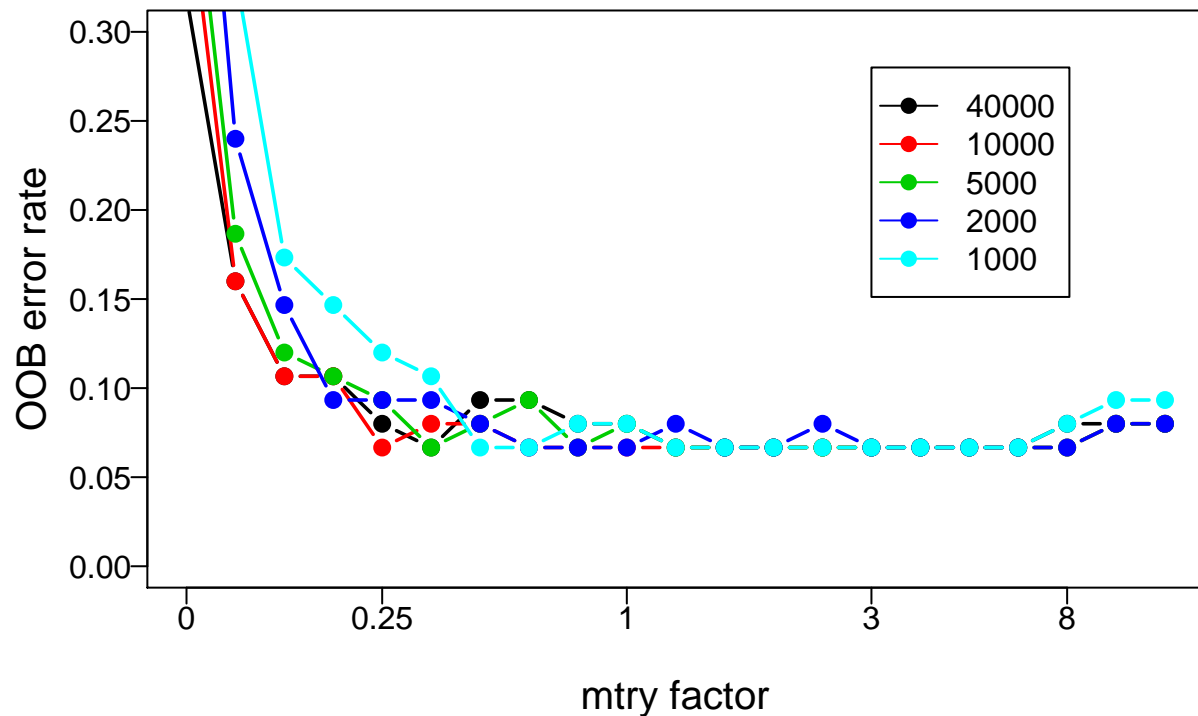

3 classes; 3 dimensions; 100 genes/dimen.; nodesize = 1

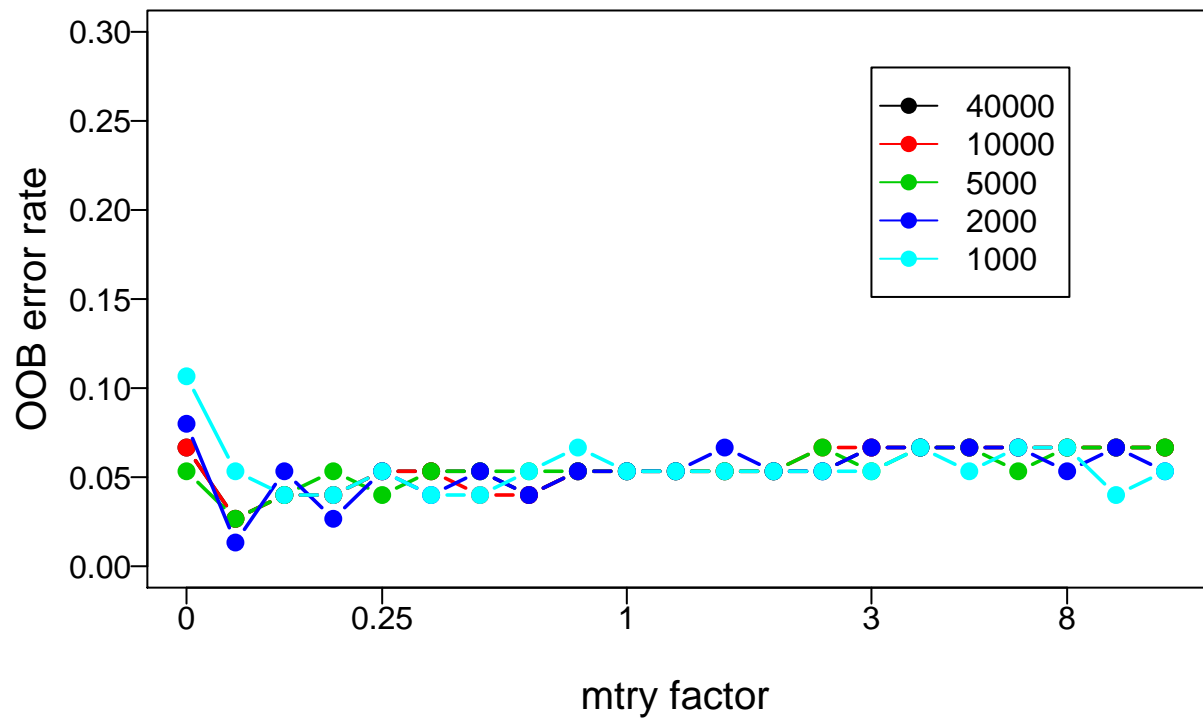

3 classes; 3 dimensions; 100 genes/dimen.; nodesize = 1

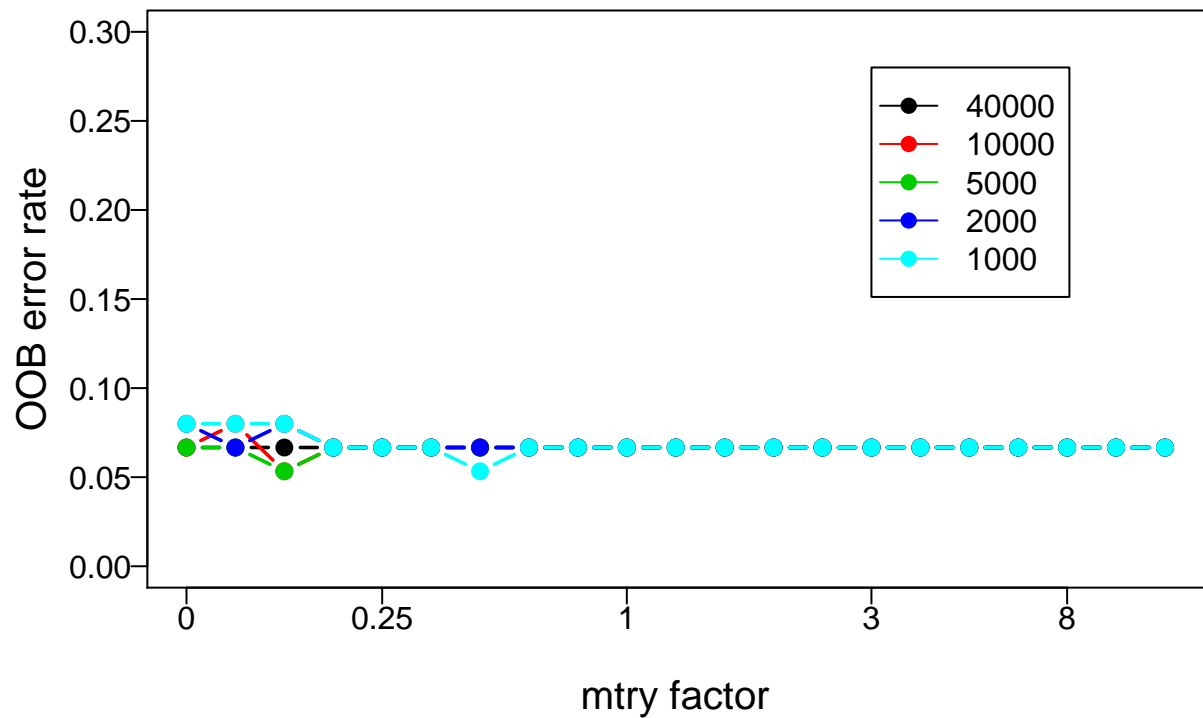

3 classes; 3 dimensions; 100 genes/dimen.; nodesize = 1

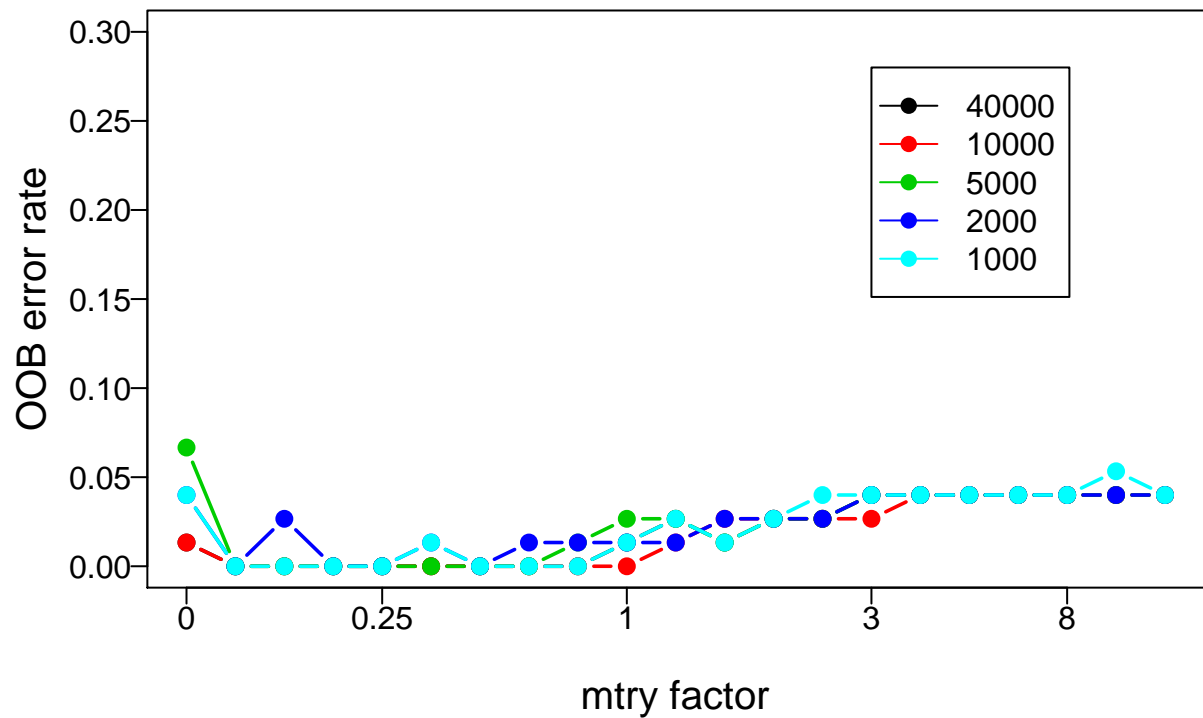

3 classes; 3 dimensions; 100 genes/dimen.; nodesize = 1

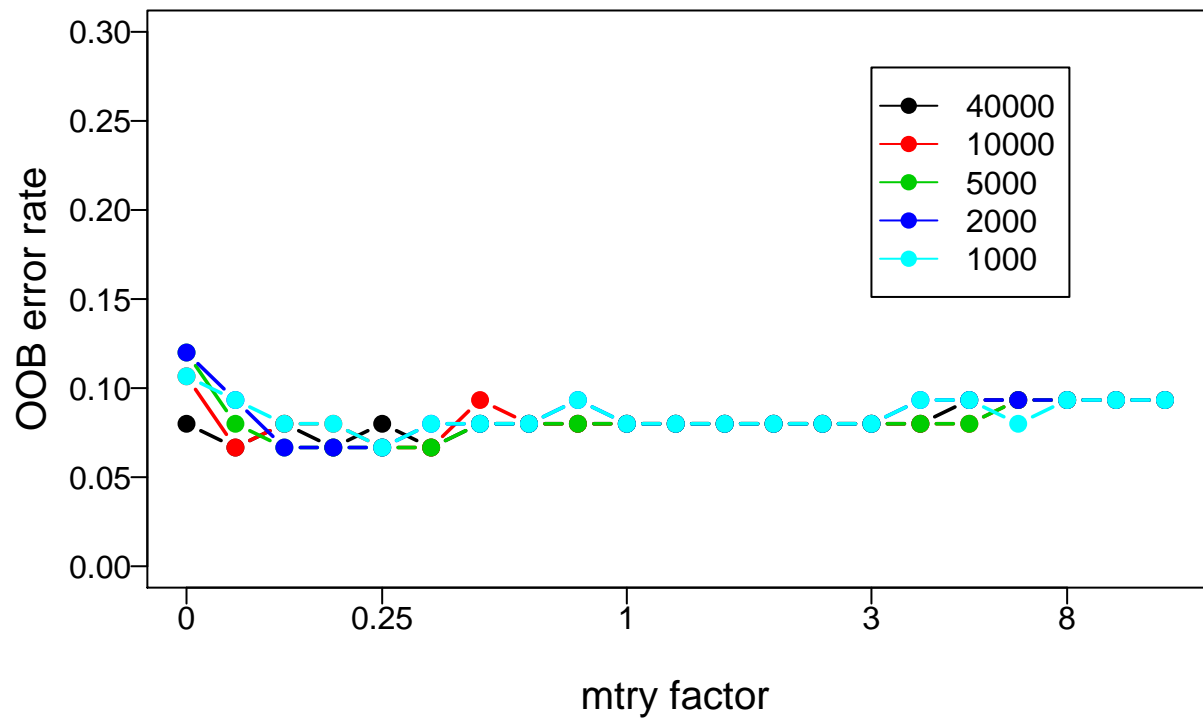

4 classes; 1 dimensions; 5 genes/dimen.; nodesize = 1

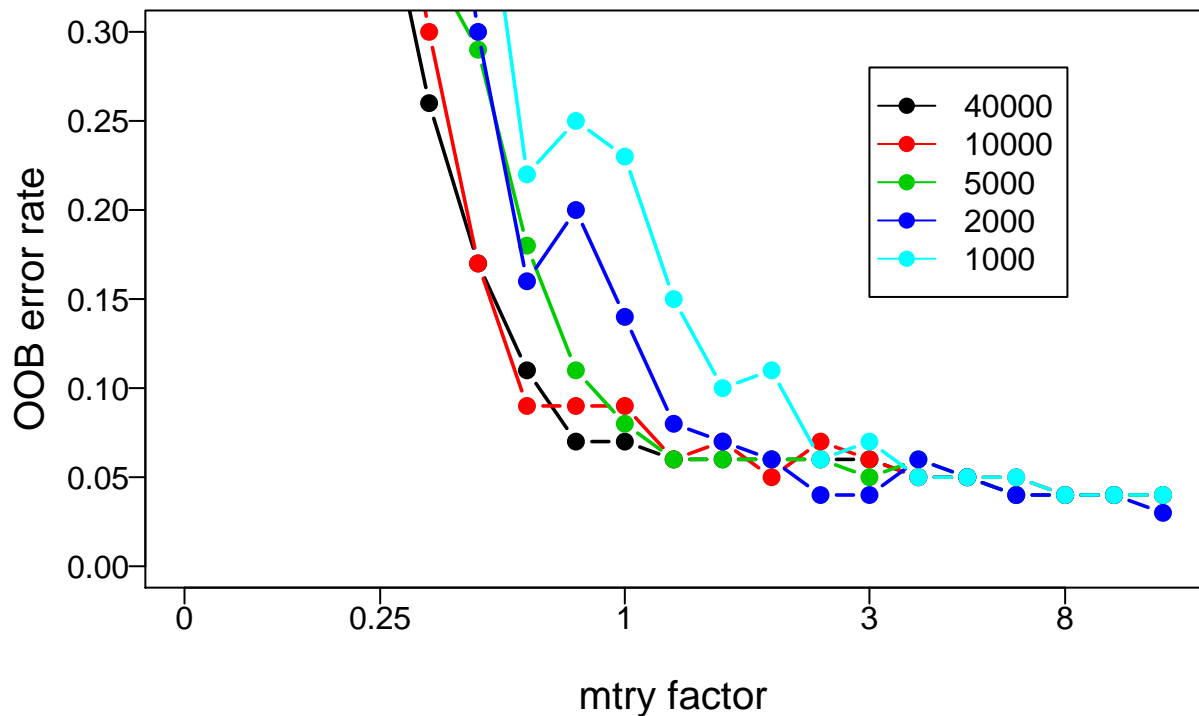

4 classes; 1 dimensions; 5 genes/dimen.; nodesize = 1

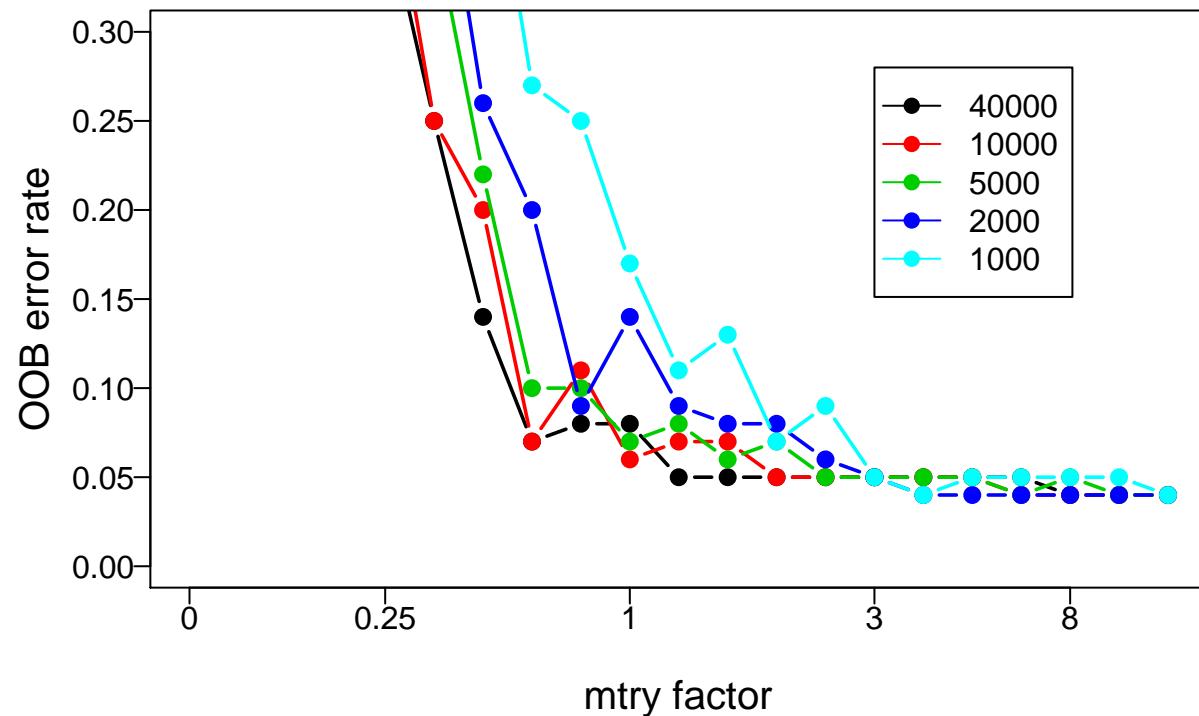

4 classes; 1 dimensions; 5 genes/dimen.; nodesize = 1

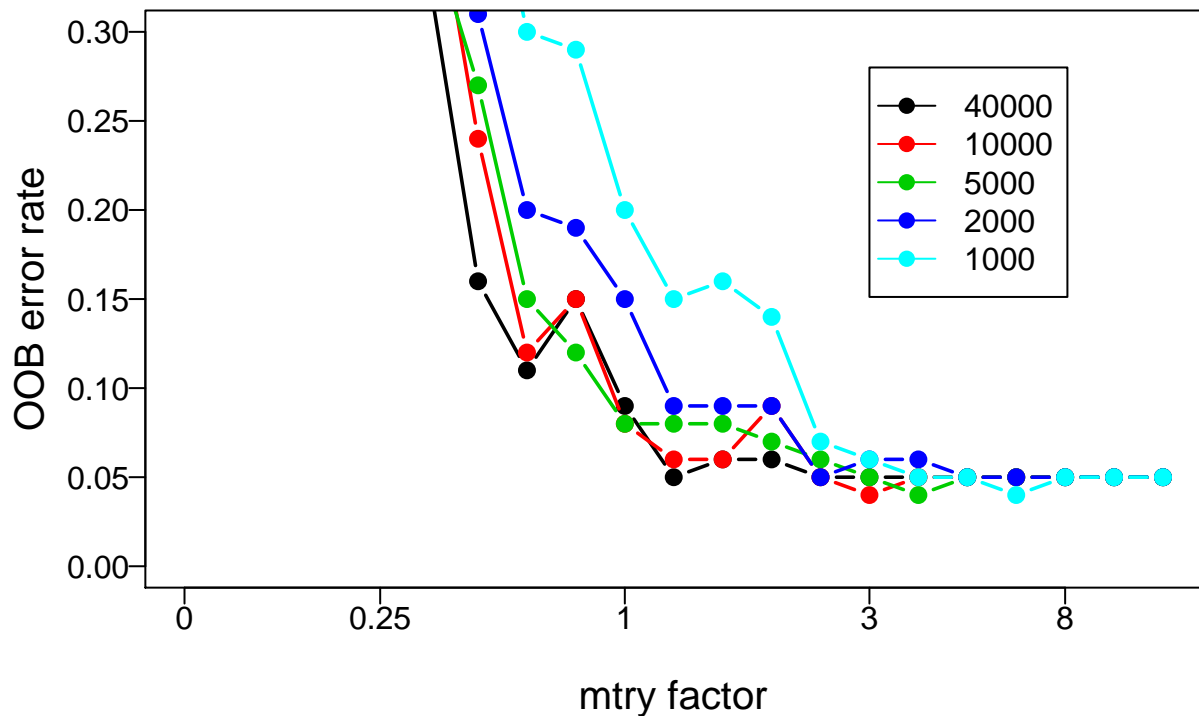

4 classes; 1 dimensions; 5 genes/dimen.; nodesize = 1

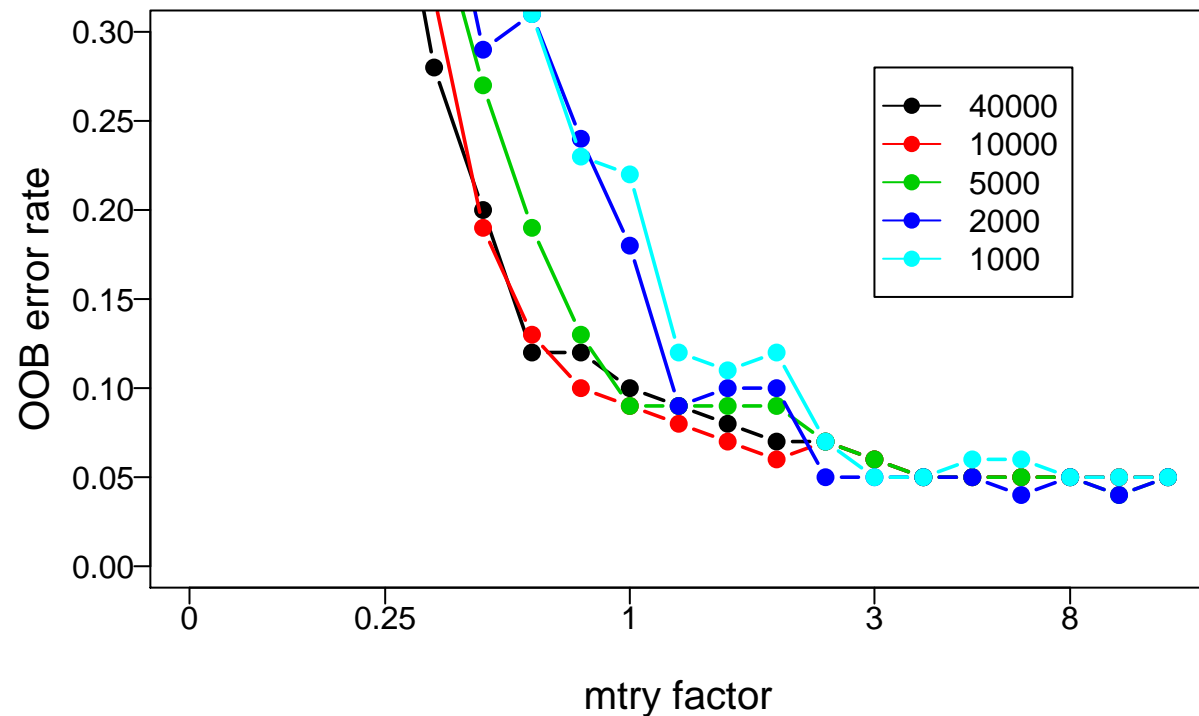

4 classes; 1 dimensions; 20 genes/dimen.; nodesize = 1

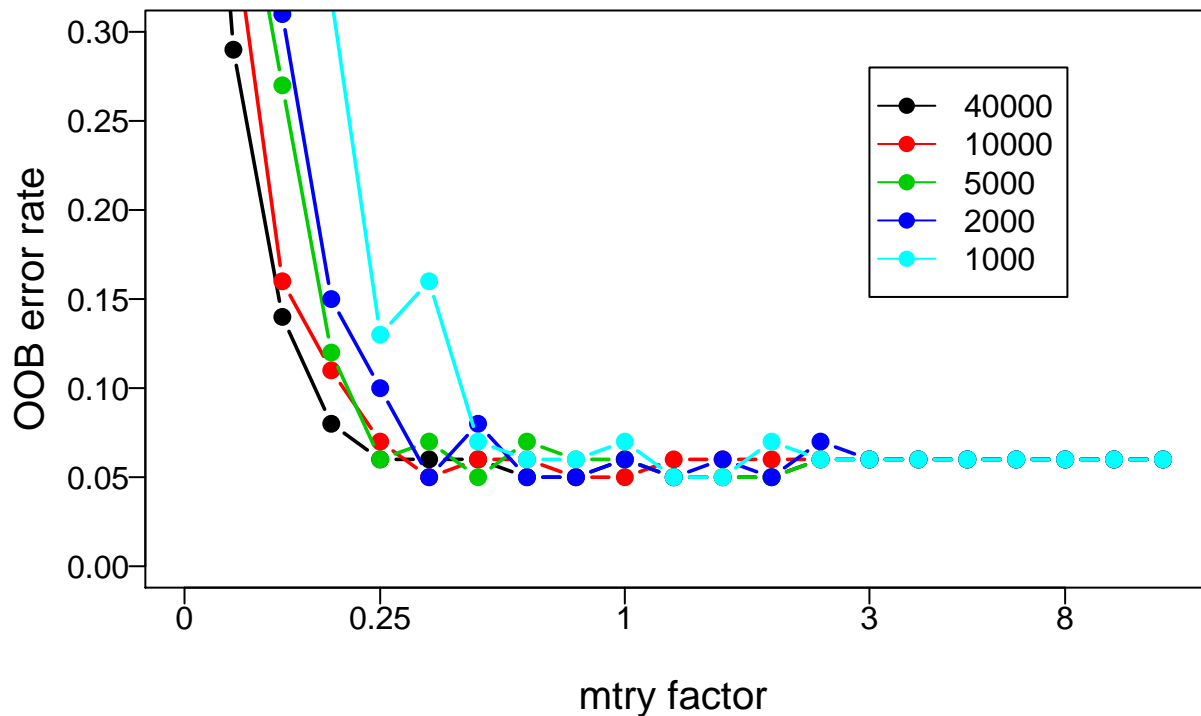

4 classes; 1 dimensions; 20 genes/dimen.; nodesize = 1

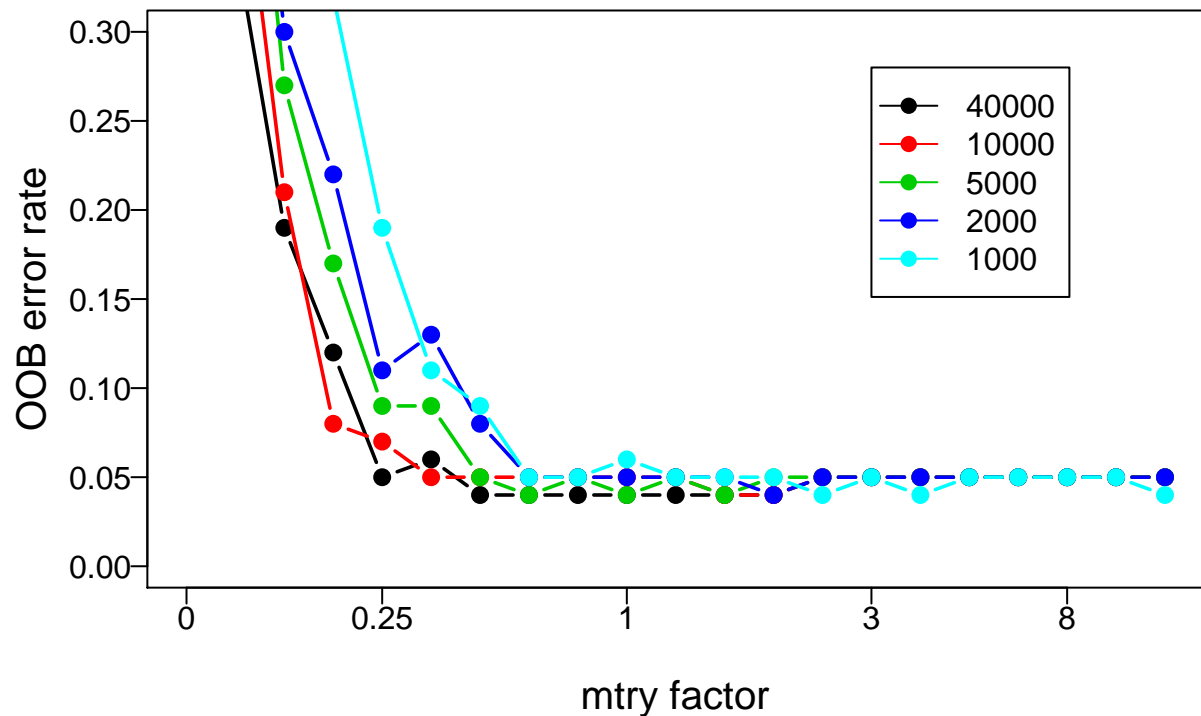

4 classes; 1 dimensions; 20 genes/dimen.; nodesize = 1

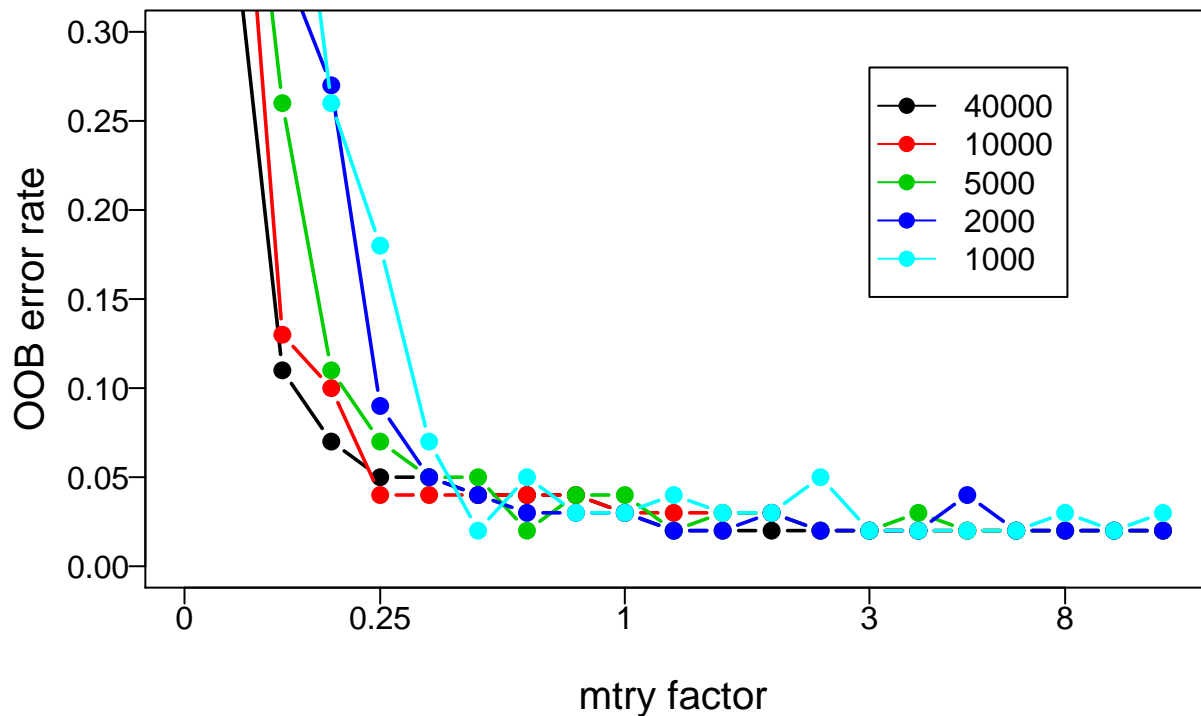

4 classes; 1 dimensions; 20 genes/dimen.; nodesize = 1

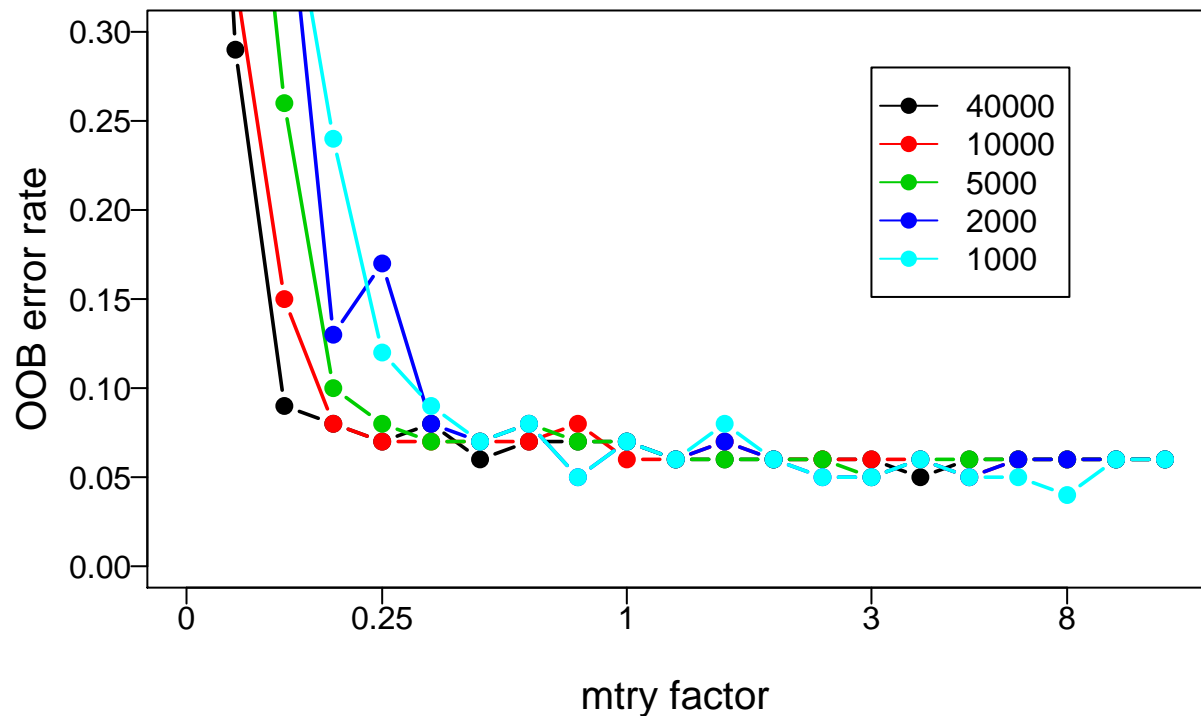

4 classes; 1 dimensions; 100 genes/dimen.; nodesize = 1

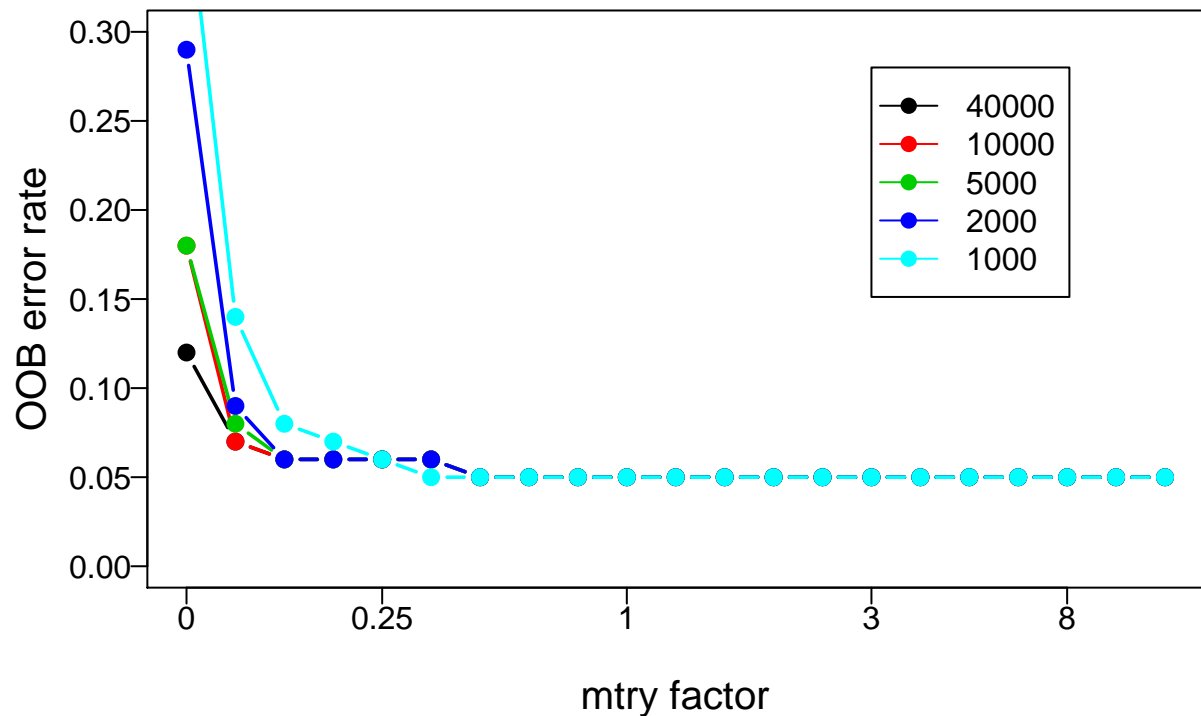

4 classes; 1 dimensions; 100 genes/dimen.; nodesize = 1

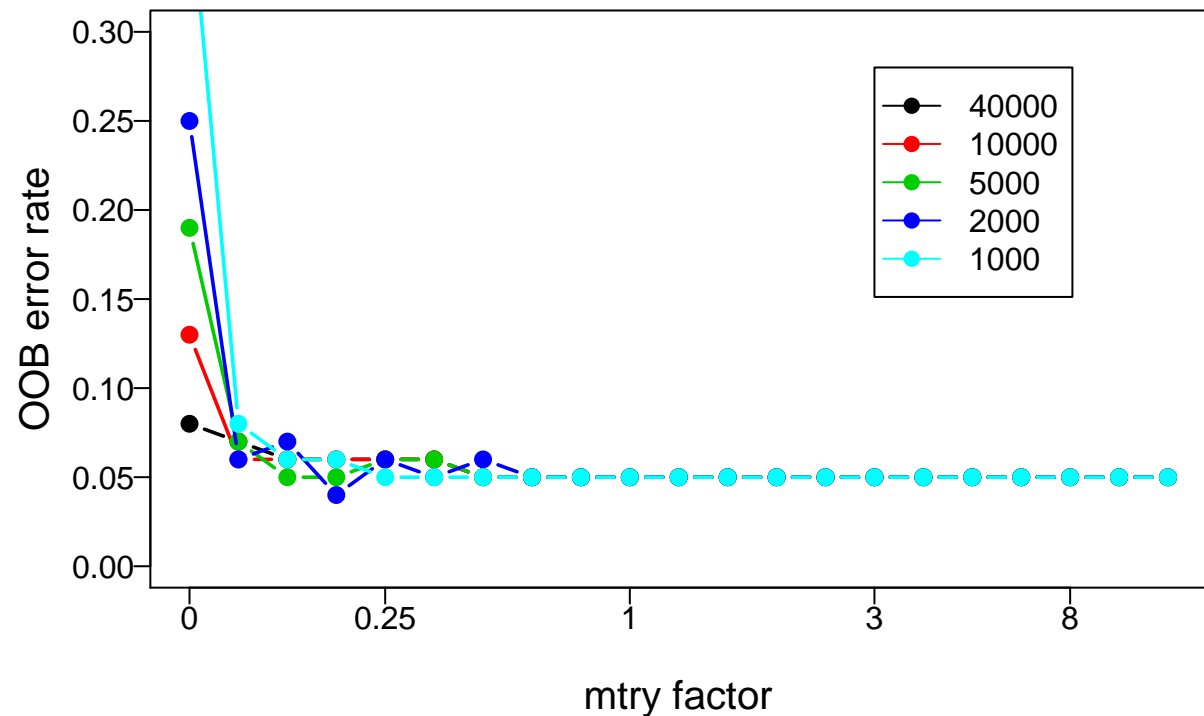

4 classes; 1 dimensions; 100 genes/dimen.; nodesize = 1

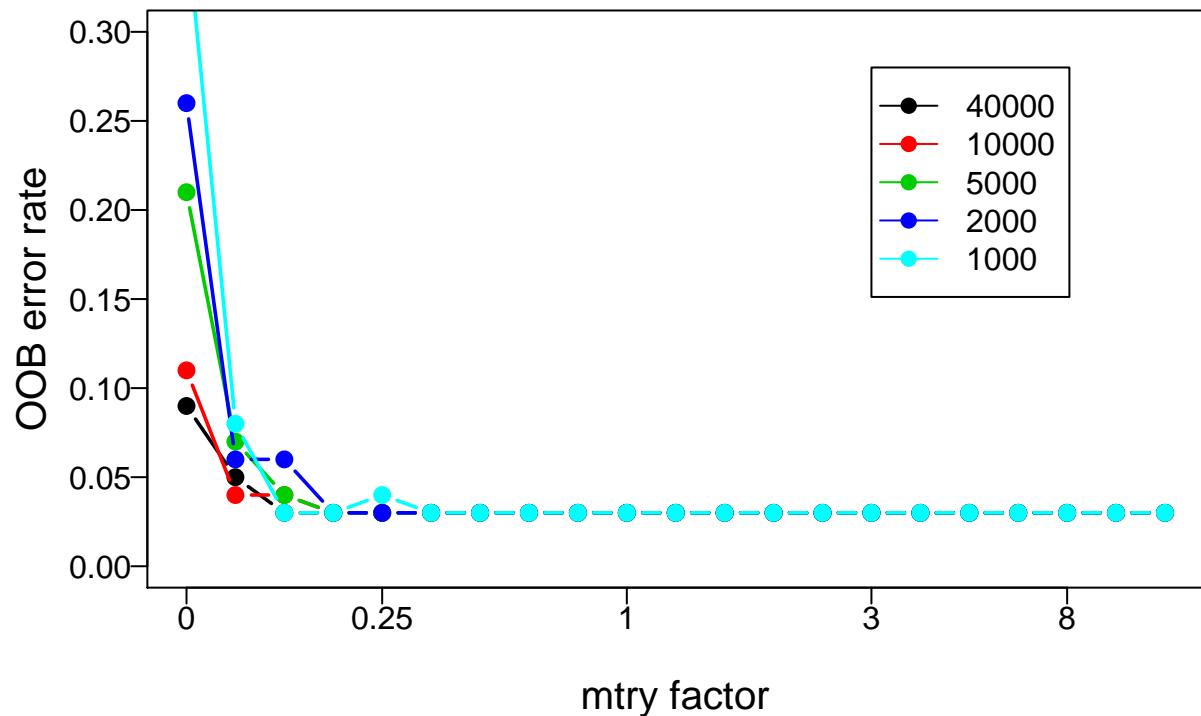

4 classes; 1 dimensions; 100 genes/dimen.; nodesize = 1

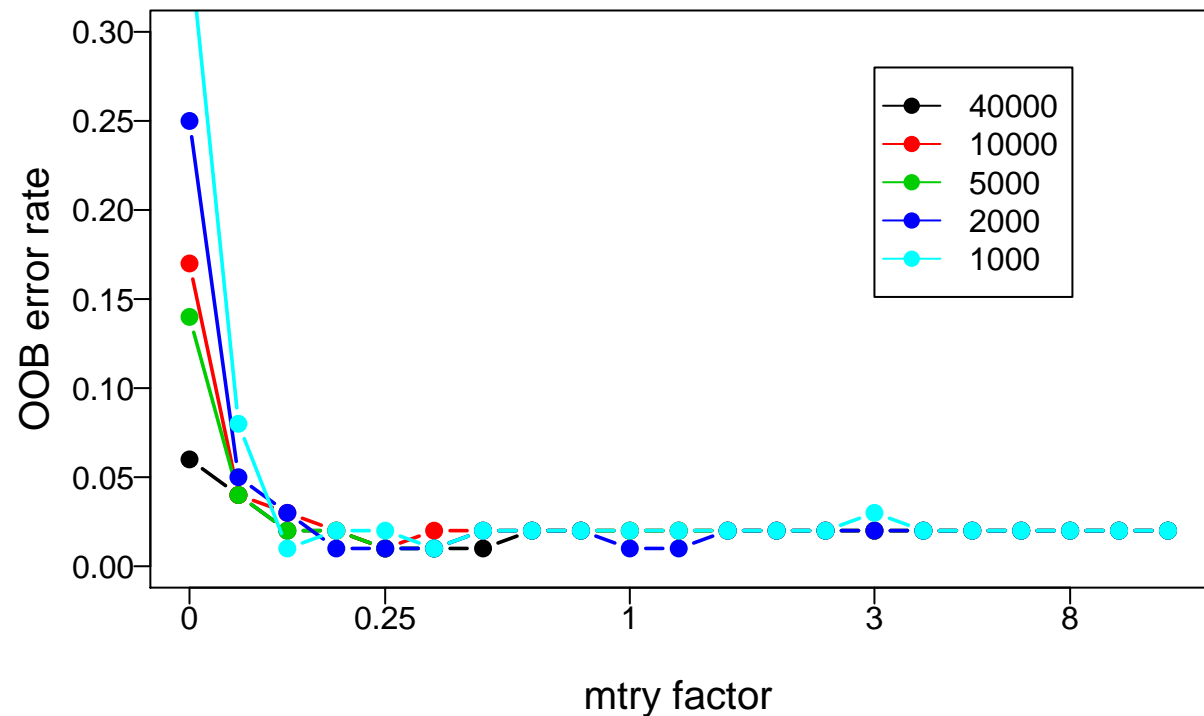

4 classes; 2 dimensions; 5 genes/dimen.; nodesize = 1

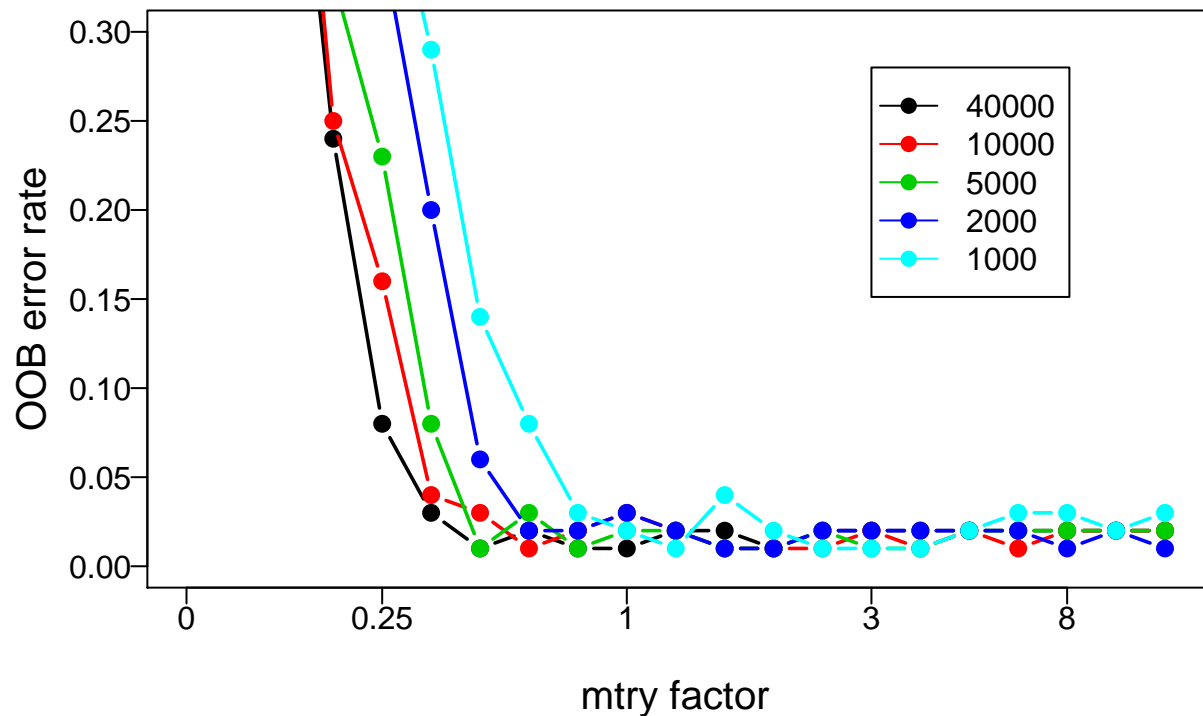

4 classes; 2 dimensions; 5 genes/dimen.; nodesize = 1

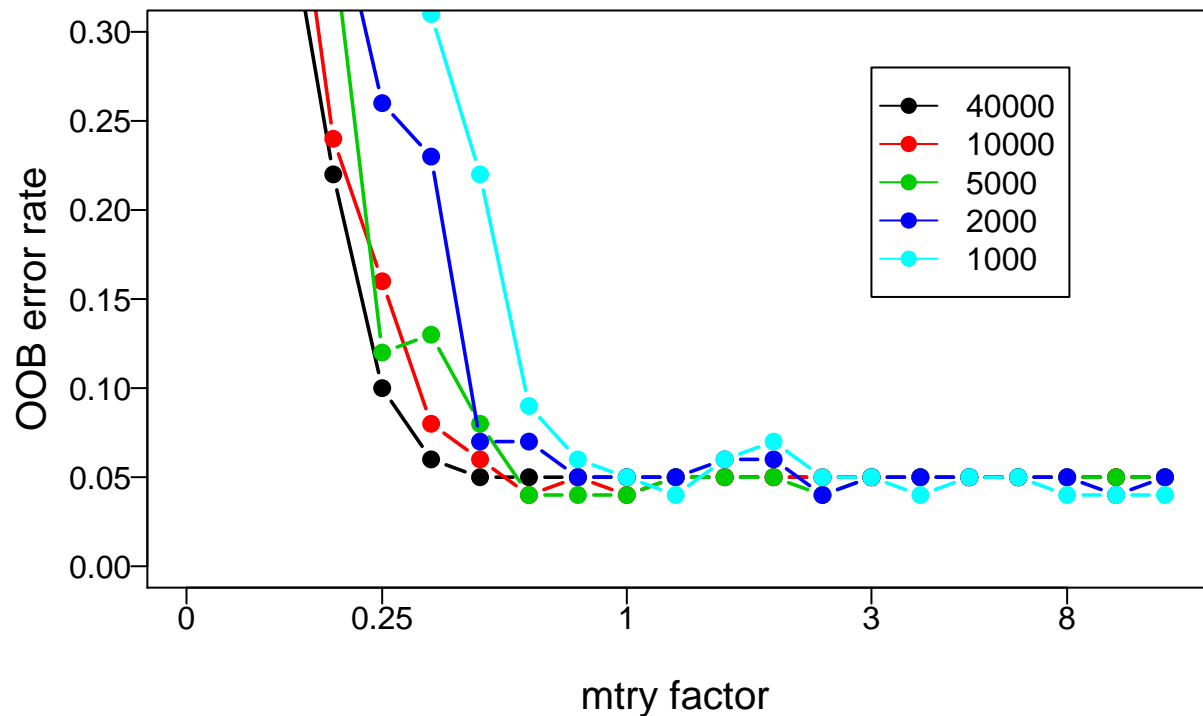

4 classes; 2 dimensions; 5 genes/dimen.; nodesize = 1

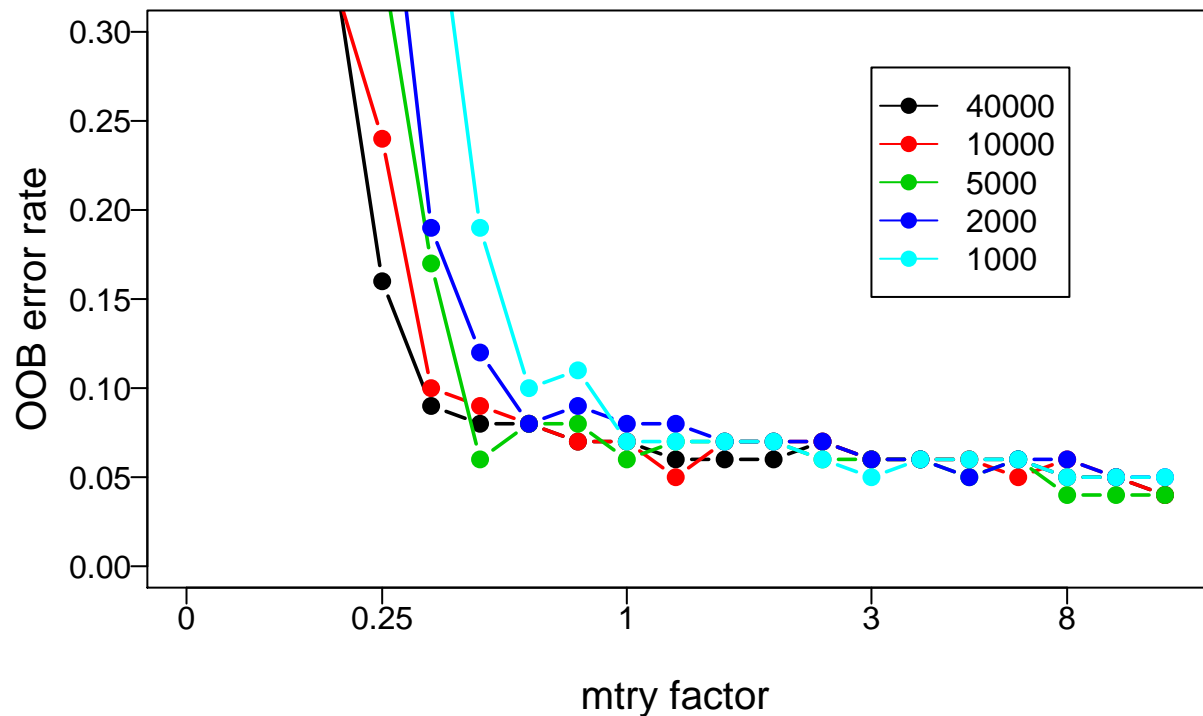

4 classes; 2 dimensions; 5 genes/dimen.; nodesize = 1

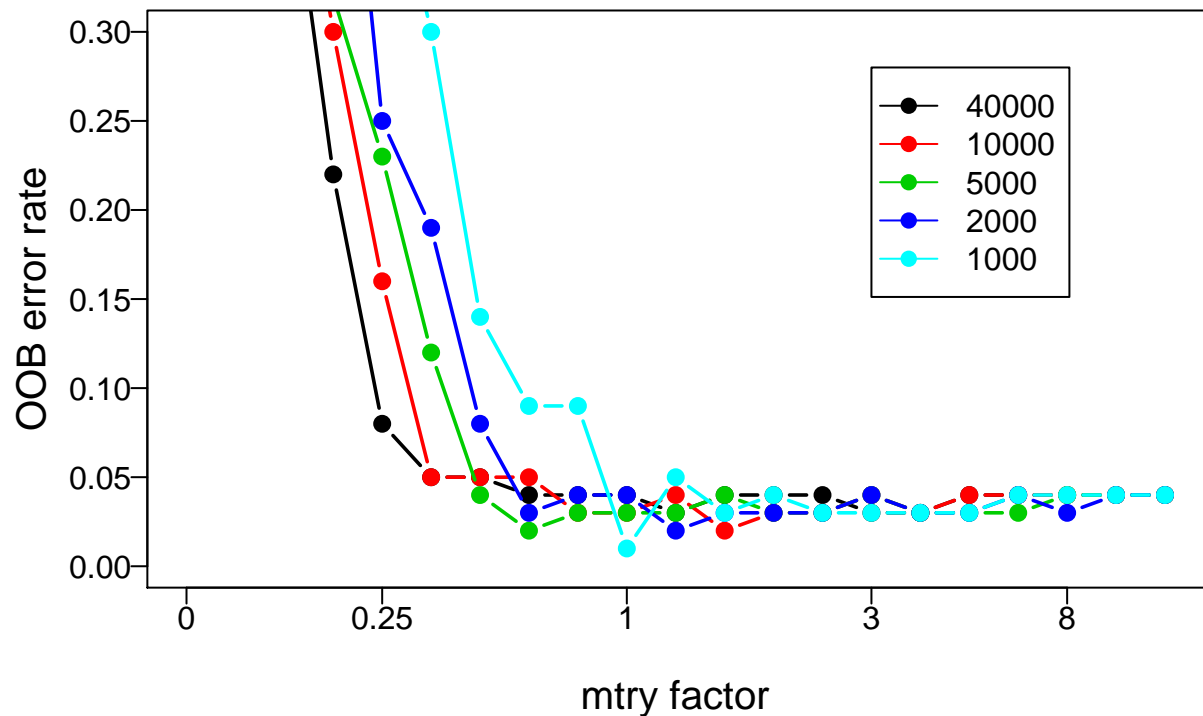

4 classes; 2 dimensions; 20 genes/dimen.; nodesize = 1

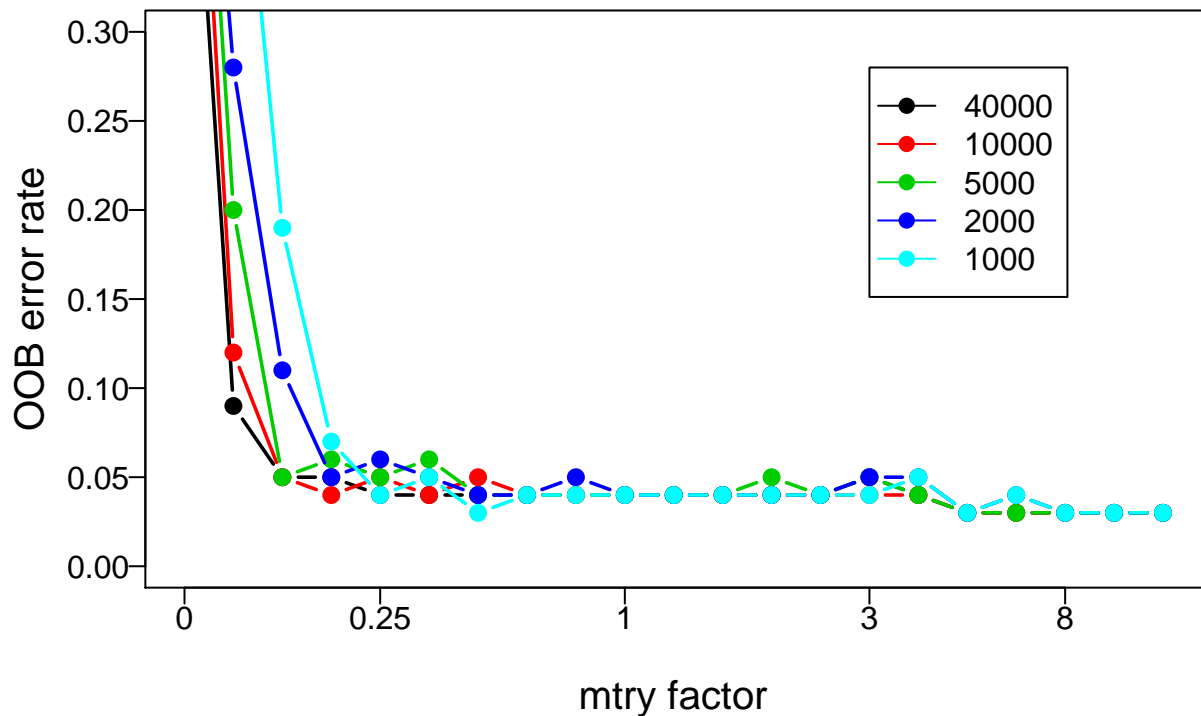

4 classes; 2 dimensions; 20 genes/dimen.; nodesize = 1

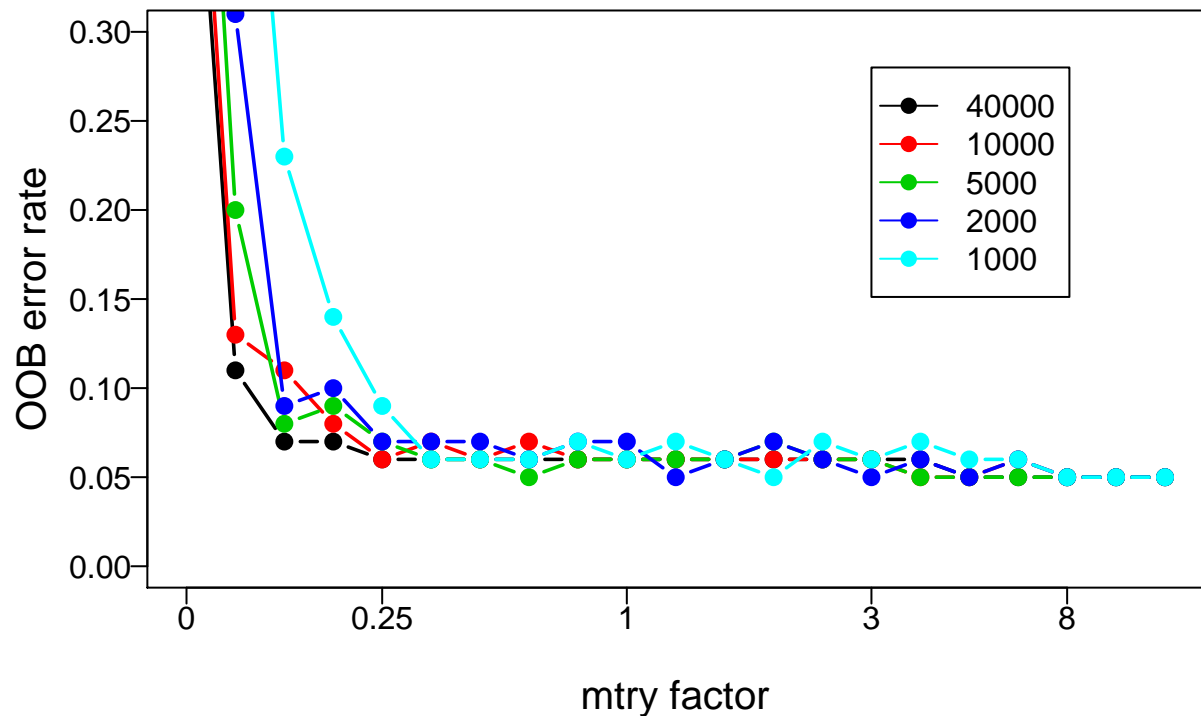

4 classes; 2 dimensions; 20 genes/dimen.; nodesize = 1

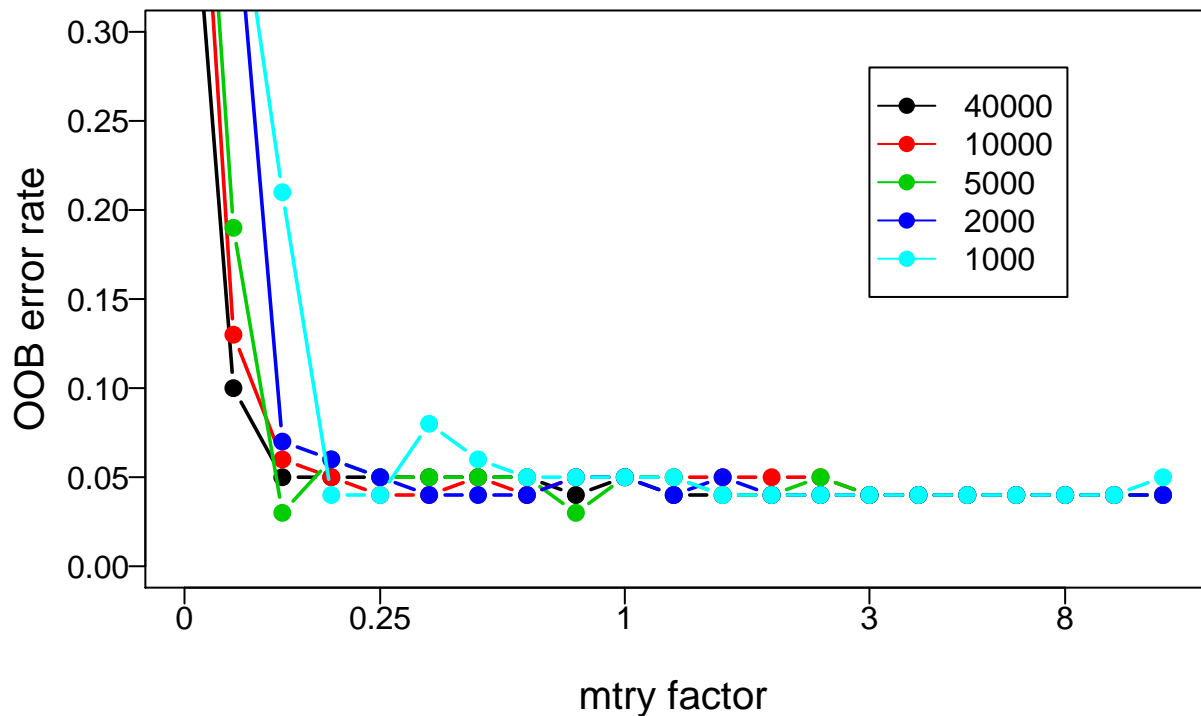

4 classes; 2 dimensions; 20 genes/dimen.; nodesize = 1

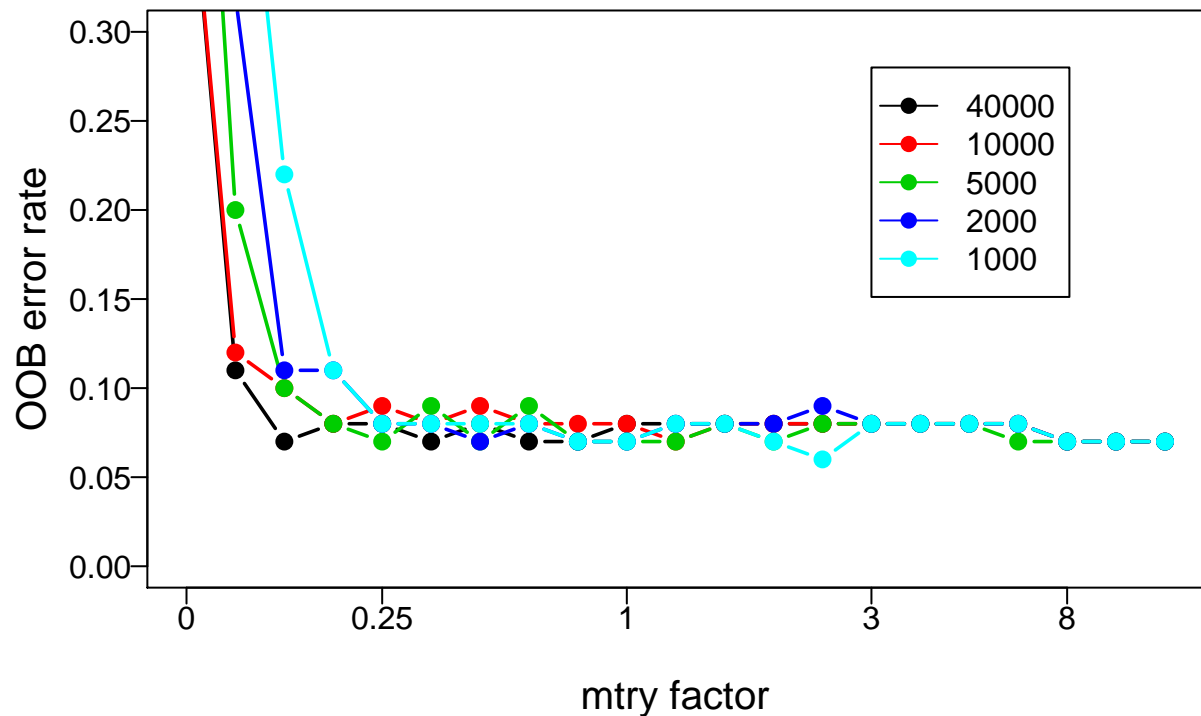



4 classes; 2 dimensions; 100 genes/dimen.; nodesize = 1

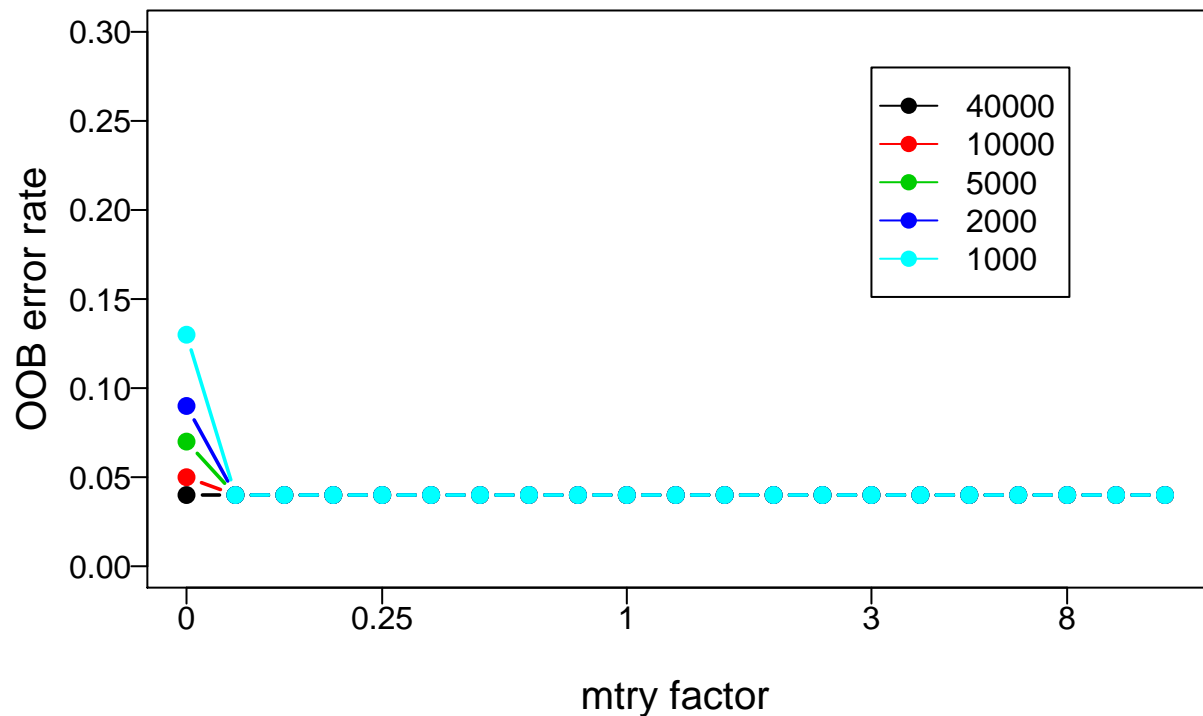

4 classes; 2 dimensions; 100 genes/dimen.; nodesize = 1

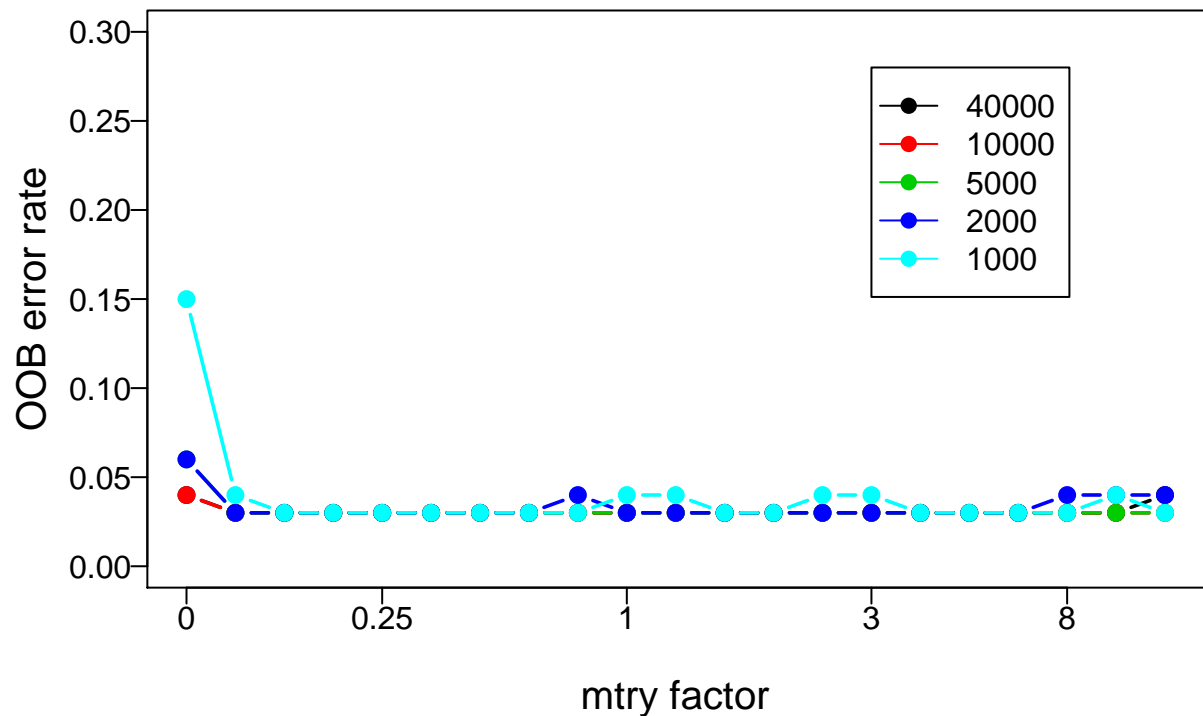

4 classes; 2 dimensions; 100 genes/dimen.; nodesize = 1

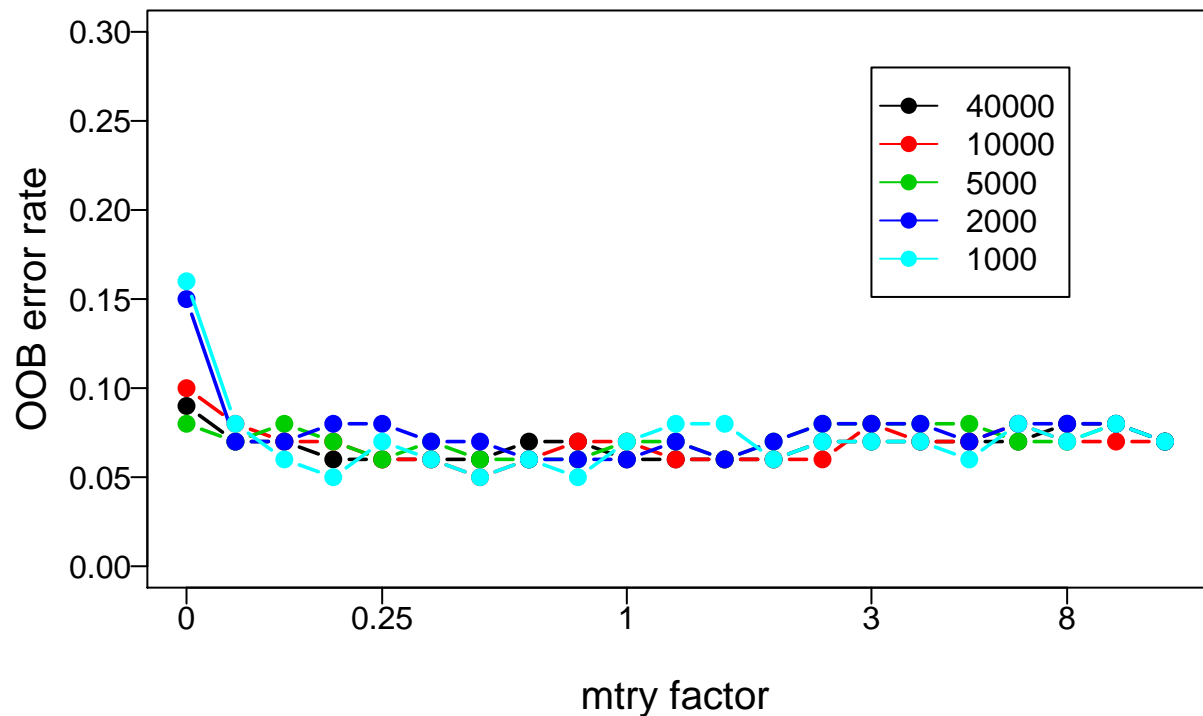

4 classes; 2 dimensions; 100 genes/dimen.; nodesize = 1

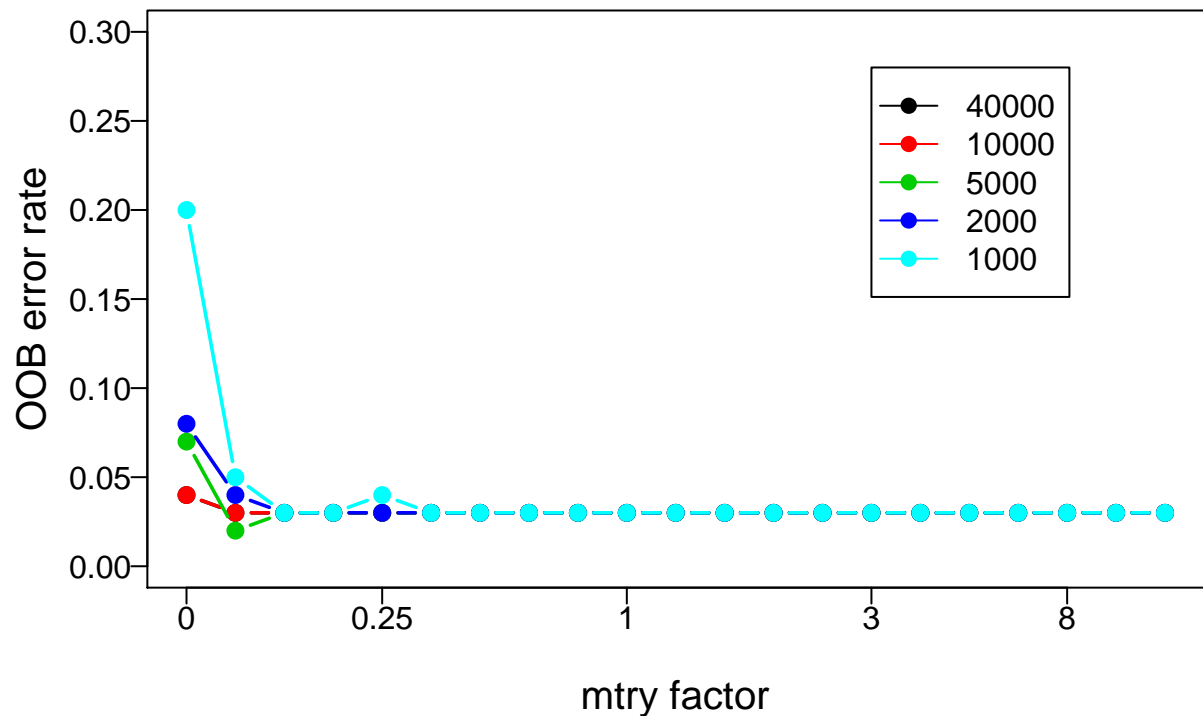

4 classes; 3 dimensions; 5 genes/dimen.; nodesize = 1

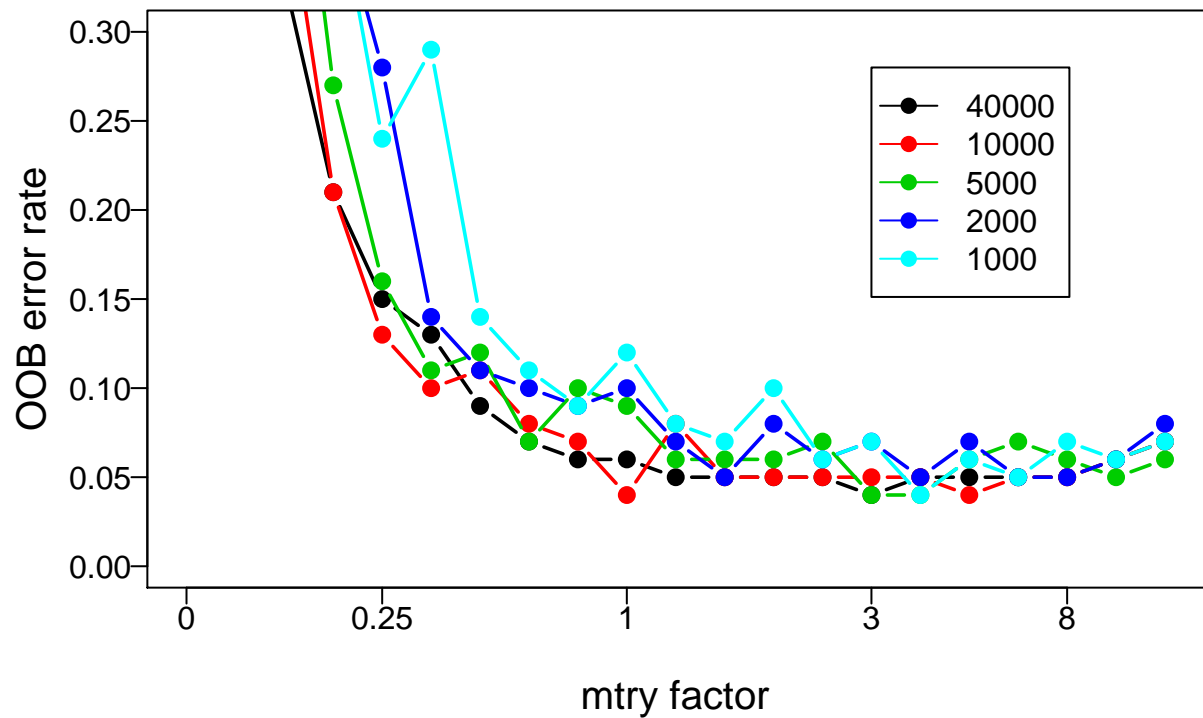

4 classes; 3 dimensions; 5 genes/dimen.; nodesize = 1

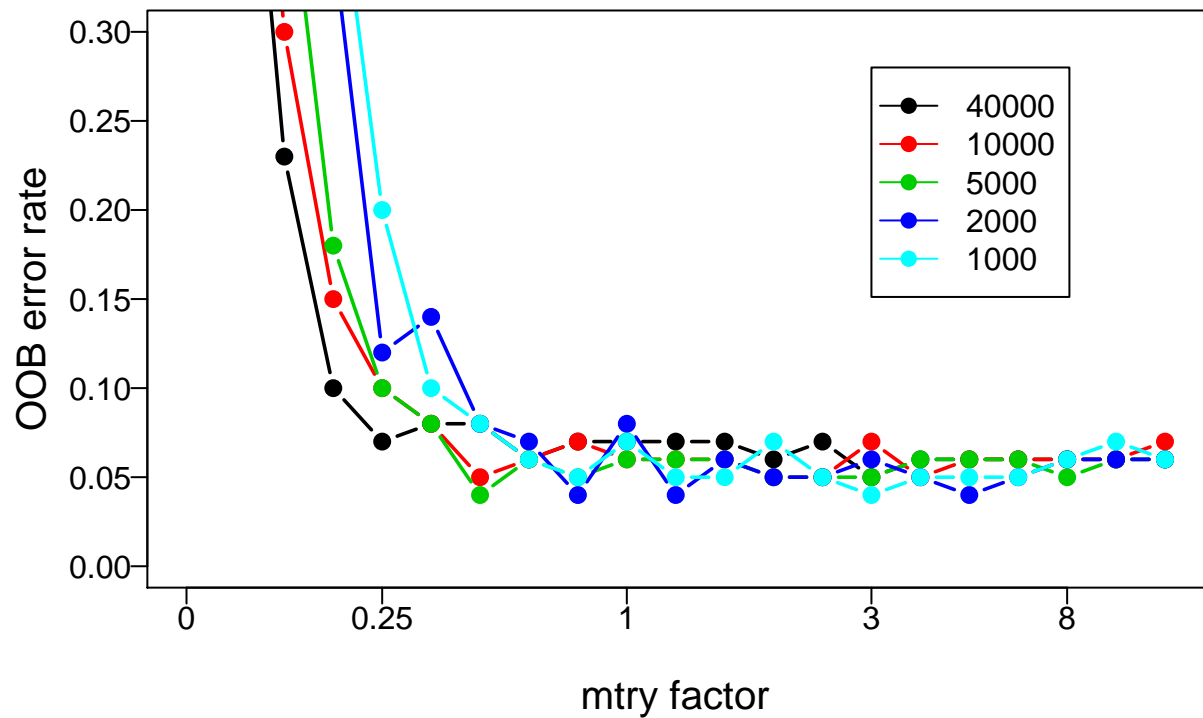

4 classes; 3 dimensions; 5 genes/dimen.; nodesize = 1

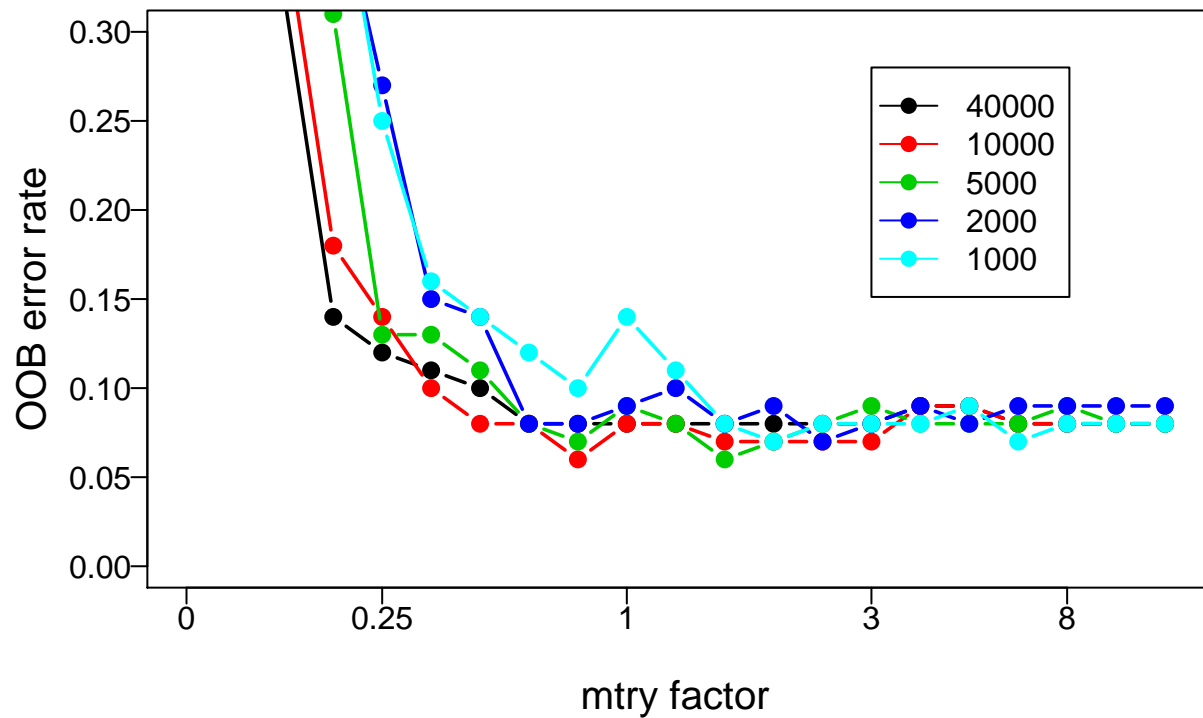

4 classes; 3 dimensions; 5 genes/dimen.; nodesize = 1

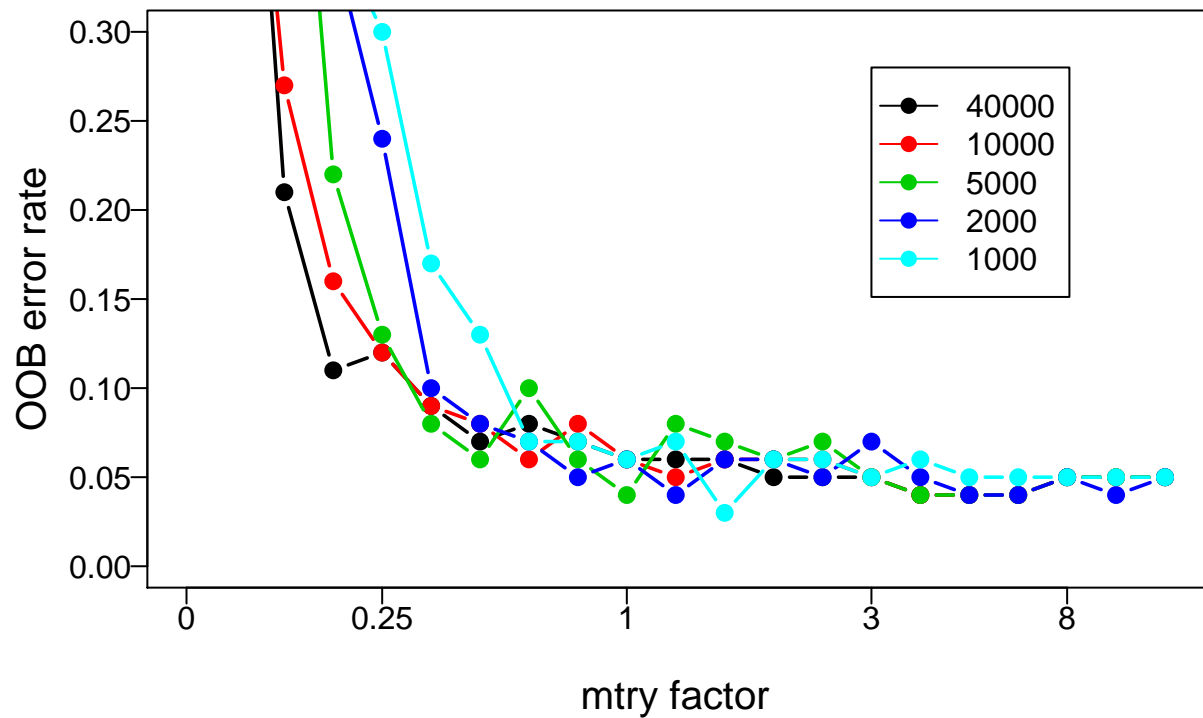

4 classes; 3 dimensions; 20 genes/dimen.; nodesize = 1

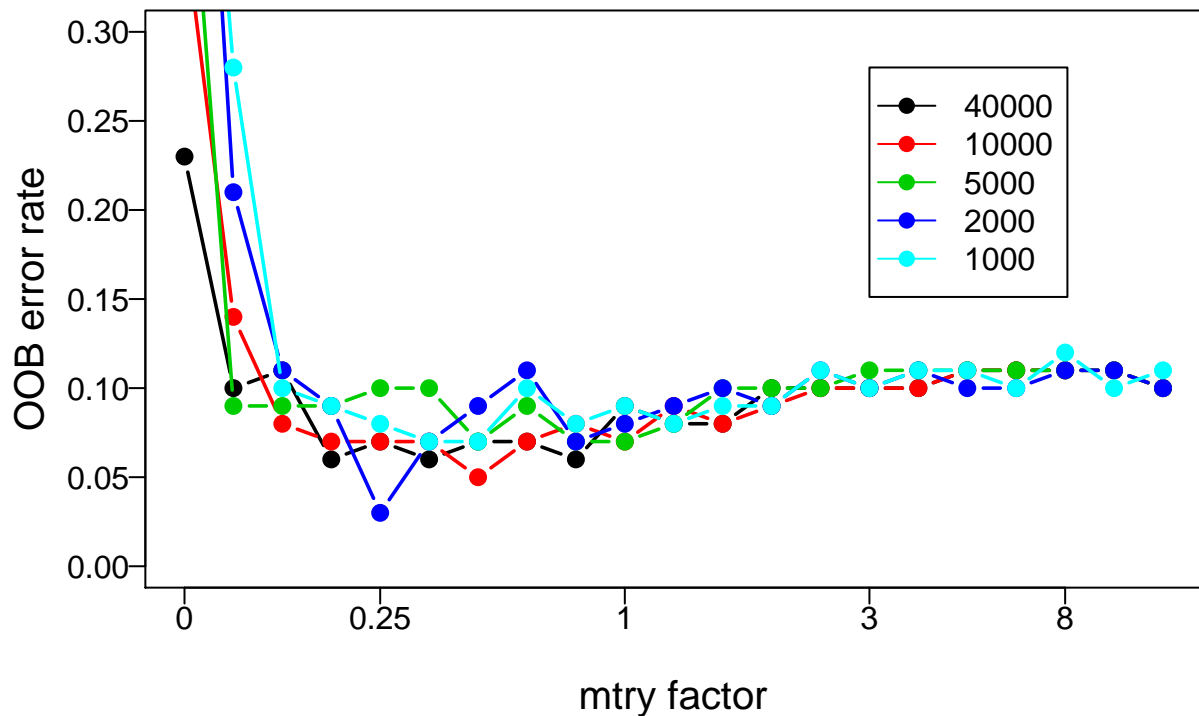

4 classes; 3 dimensions; 20 genes/dimen.; nodesize = 1

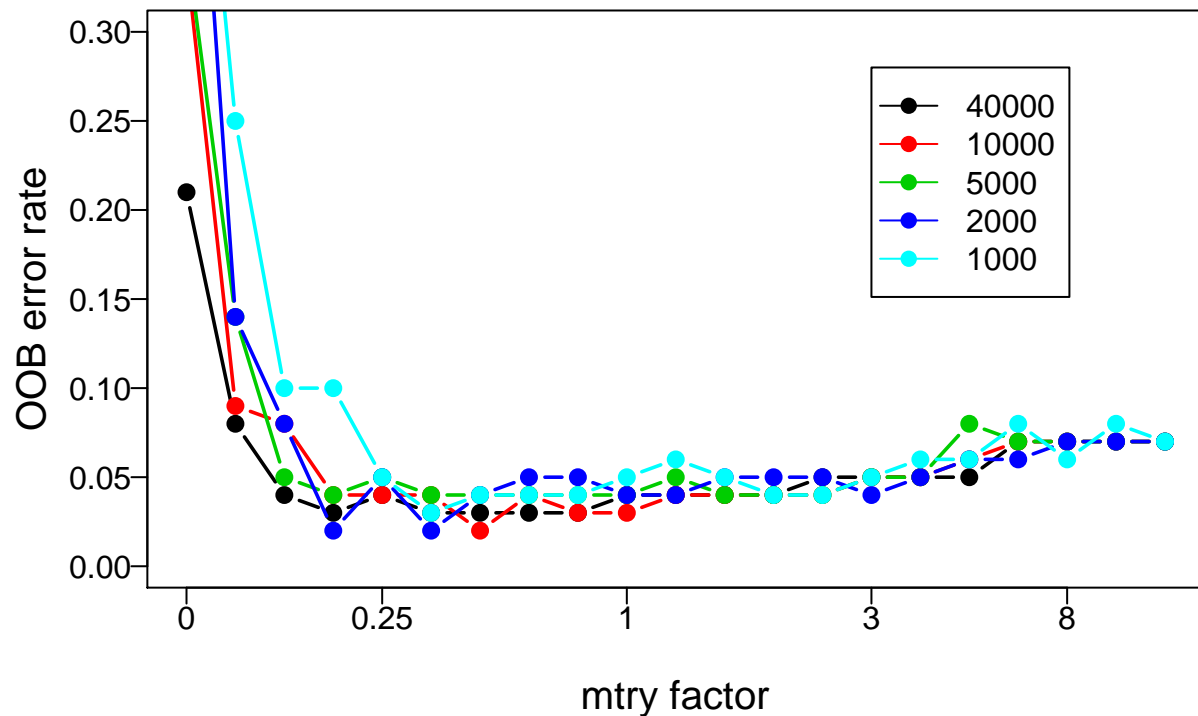

4 classes; 3 dimensions; 20 genes/dimen.; nodesize = 1

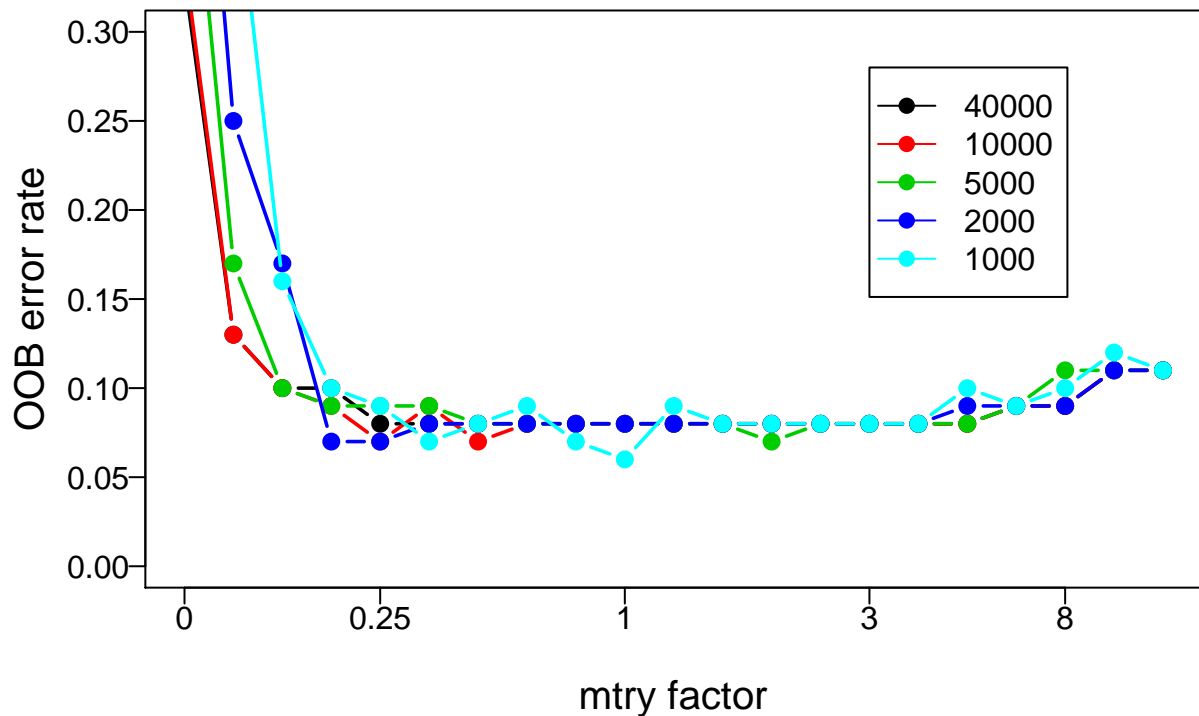

4 classes; 3 dimensions; 20 genes/dimen.; nodesize = 1

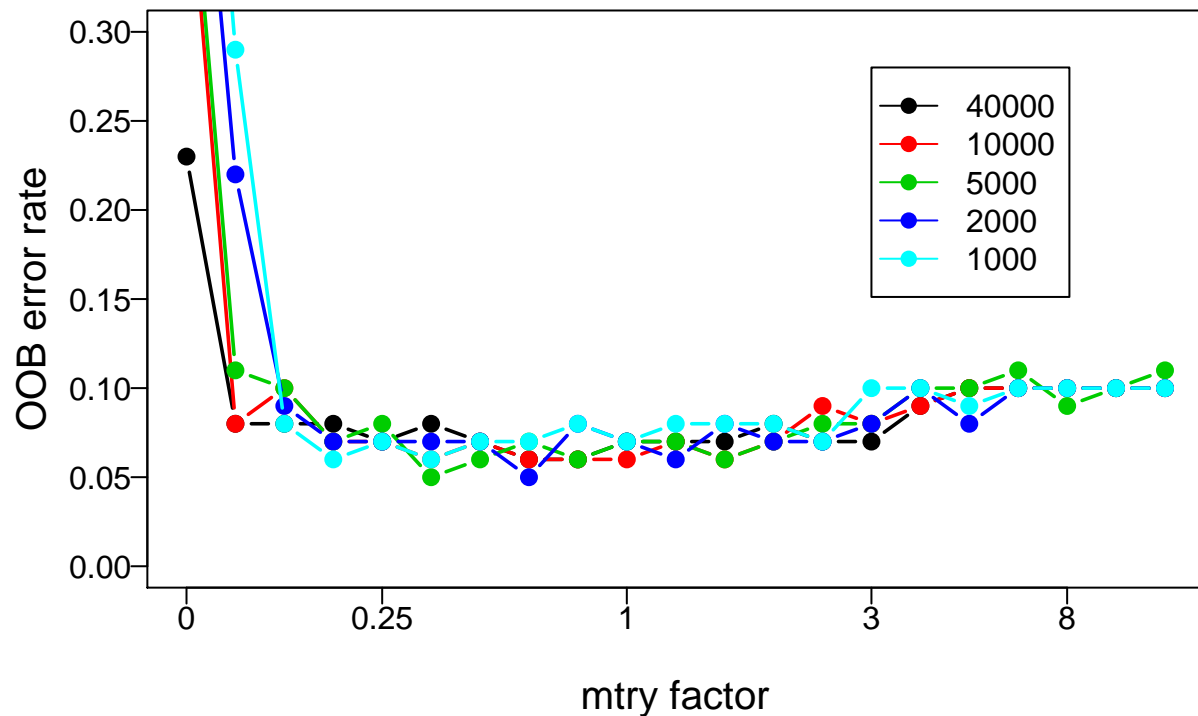

4 classes; 3 dimensions; 100 genes/dimen.; nodesize = 1

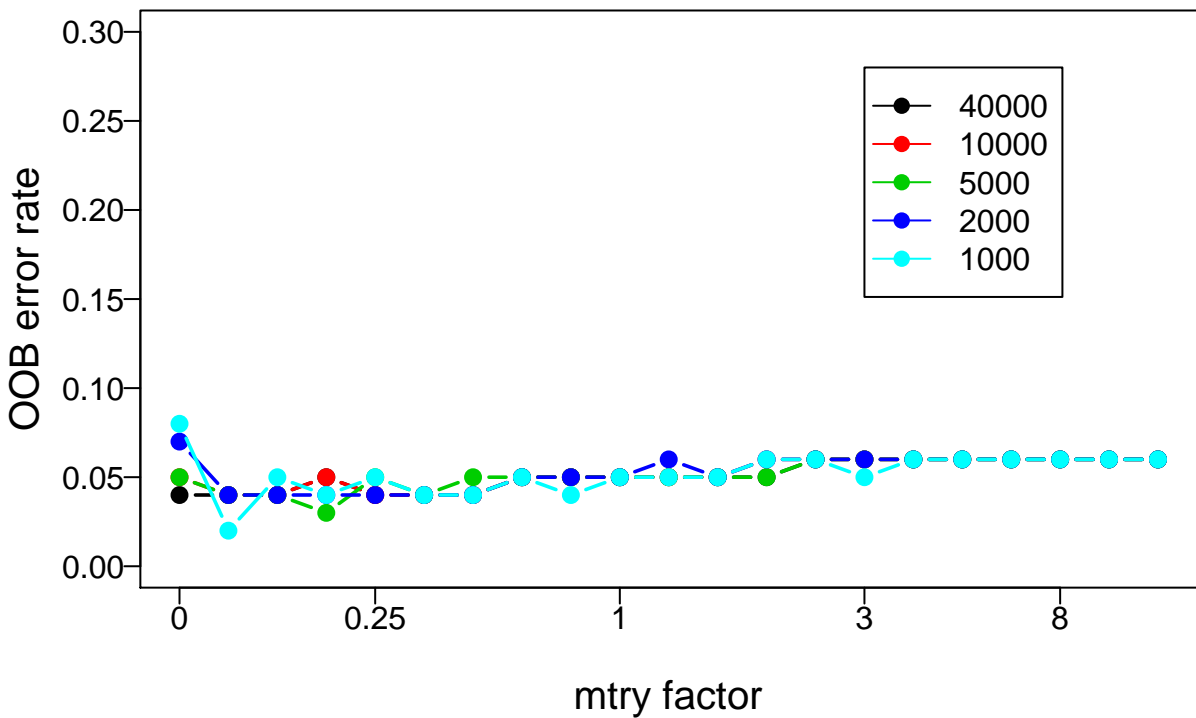

4 classes; 3 dimensions; 100 genes/dimen.; nodesize = 1

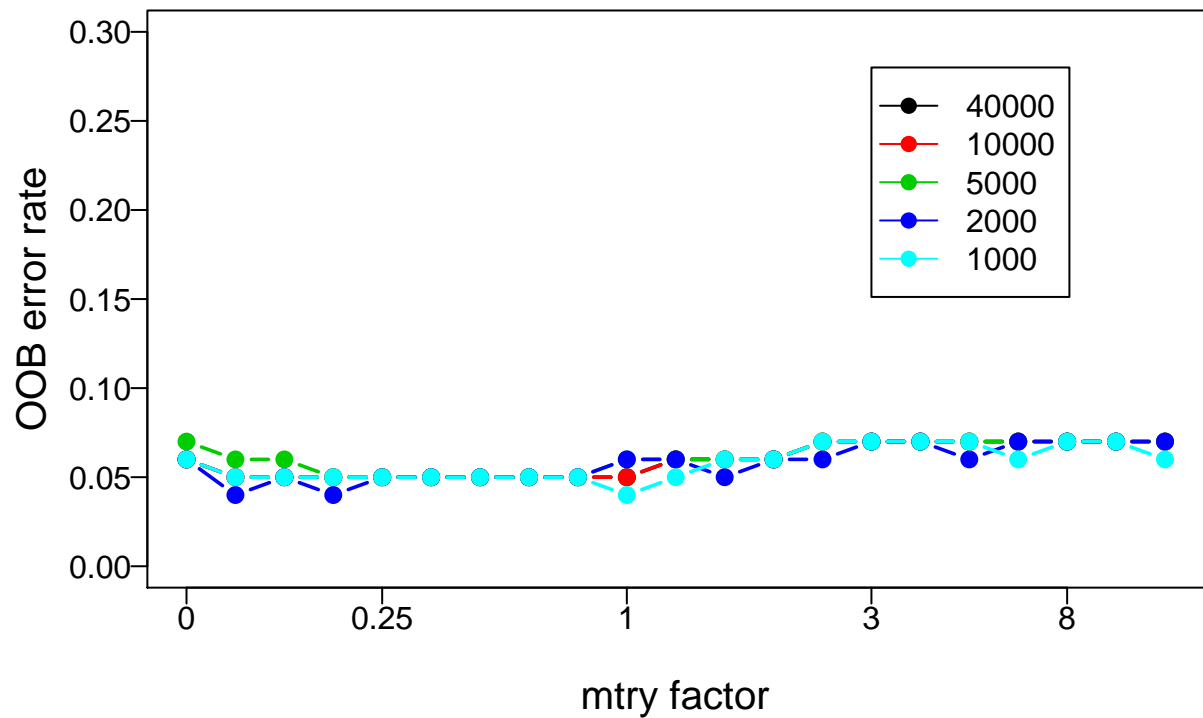

4 classes; 3 dimensions; 100 genes/dimen.; nodesize = 1

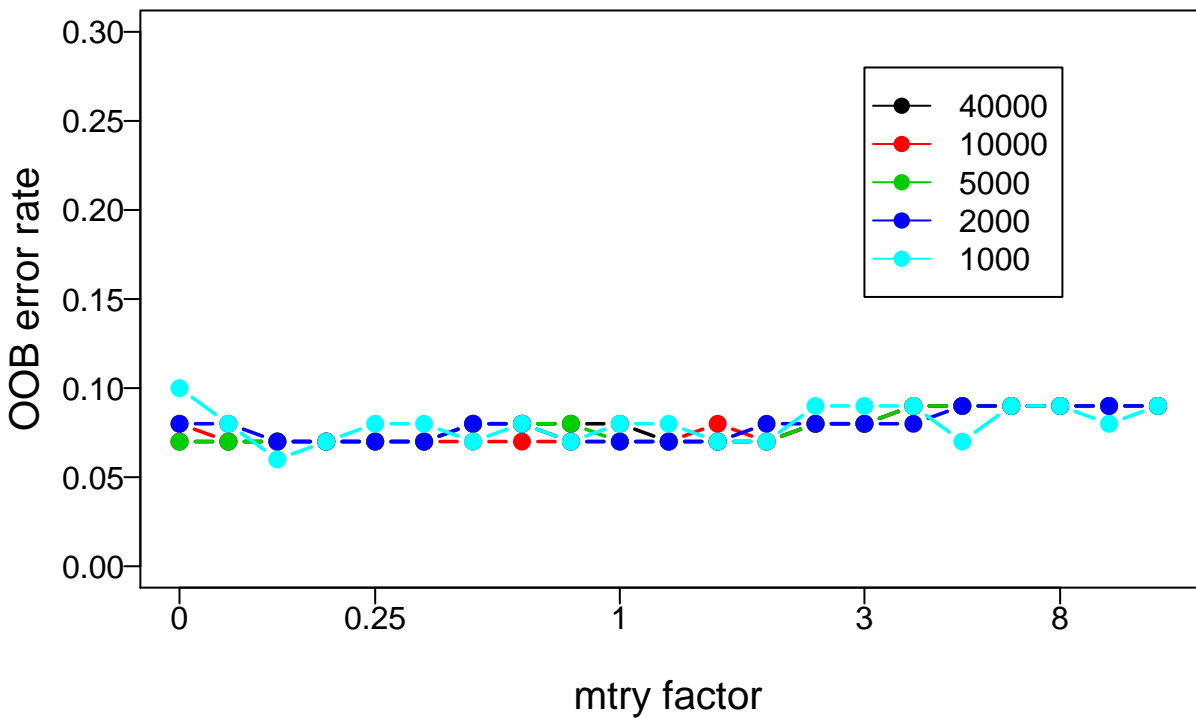

4 classes; 3 dimensions; 100 genes/dimen.; nodesize = 1

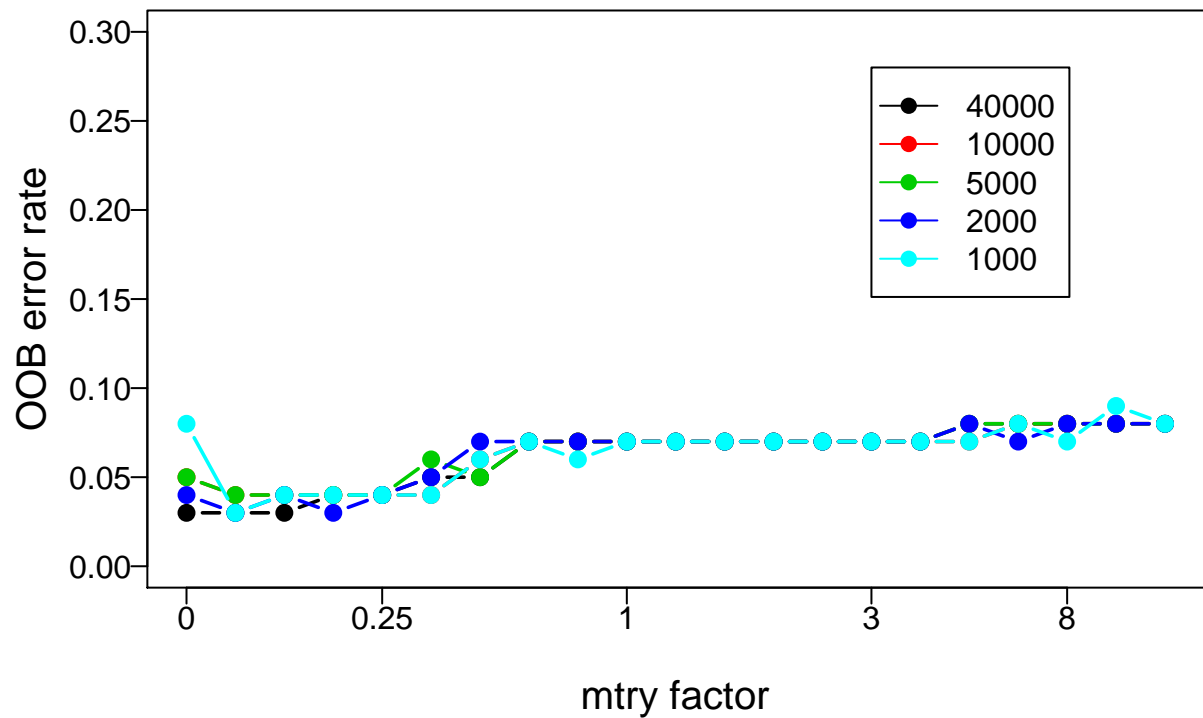

2 classes; 1 dimensions; 5 genes/dimen.; nodesize = 5

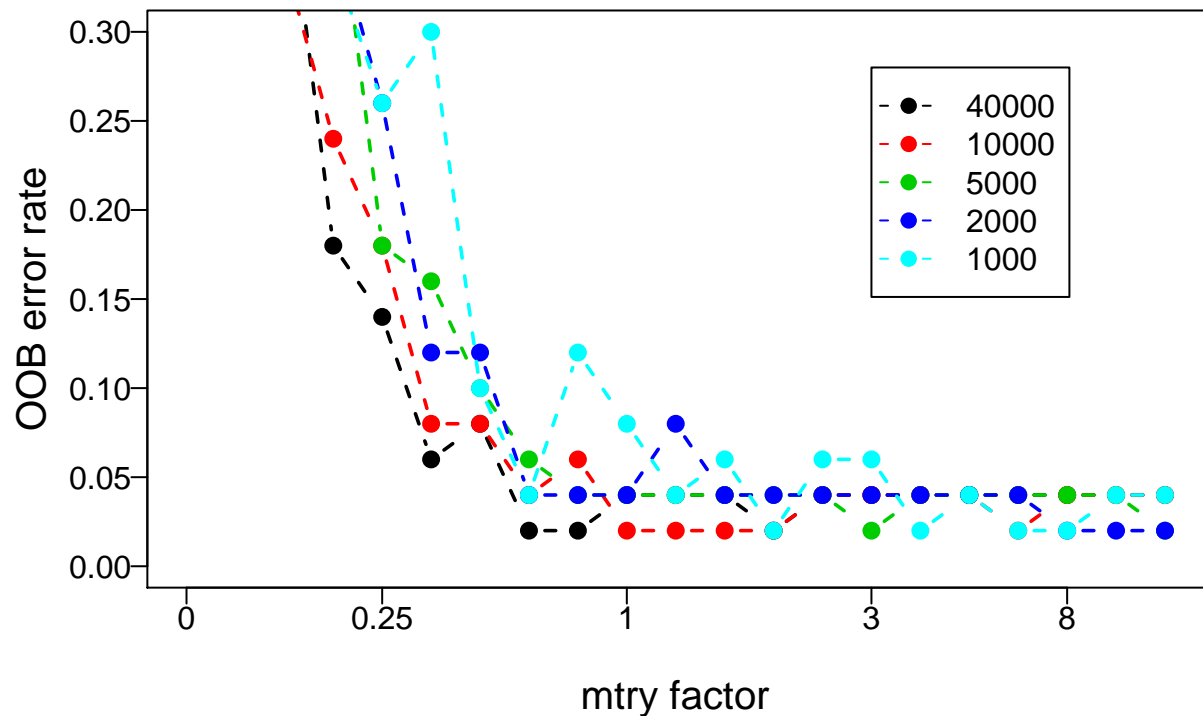

2 classes; 1 dimensions; 5 genes/dimen.; nodesize = 5

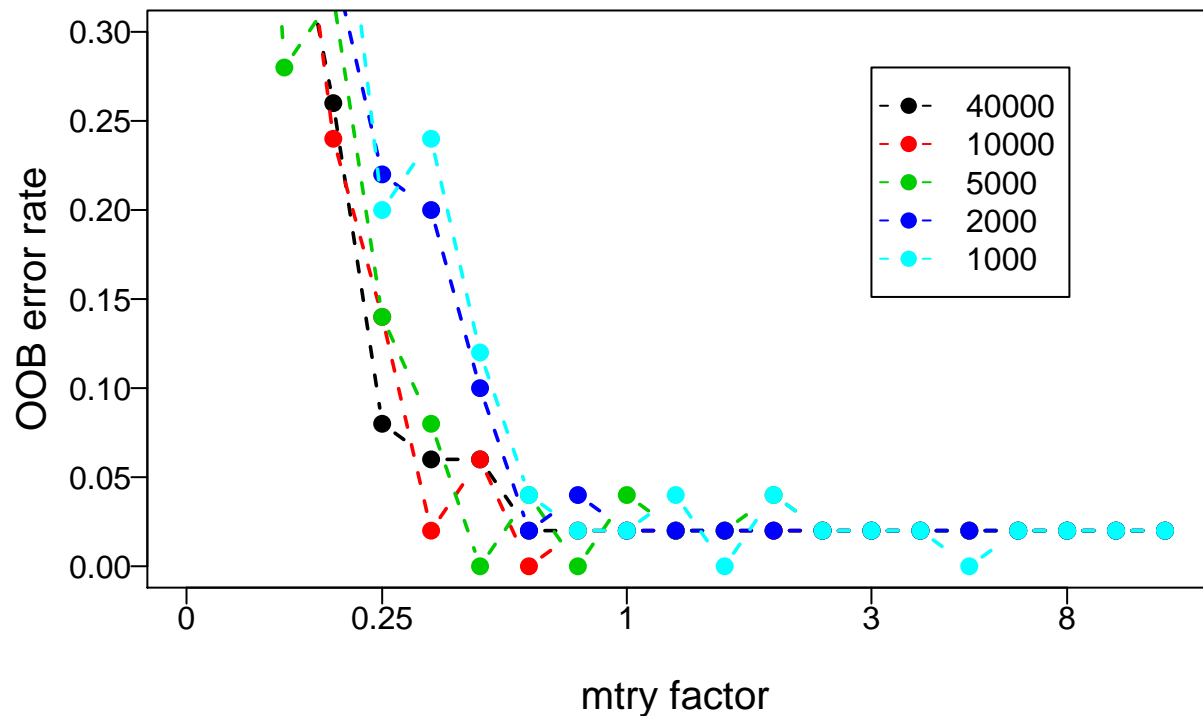

2 classes; 1 dimensions; 5 genes/dimen.; nodesize = 5

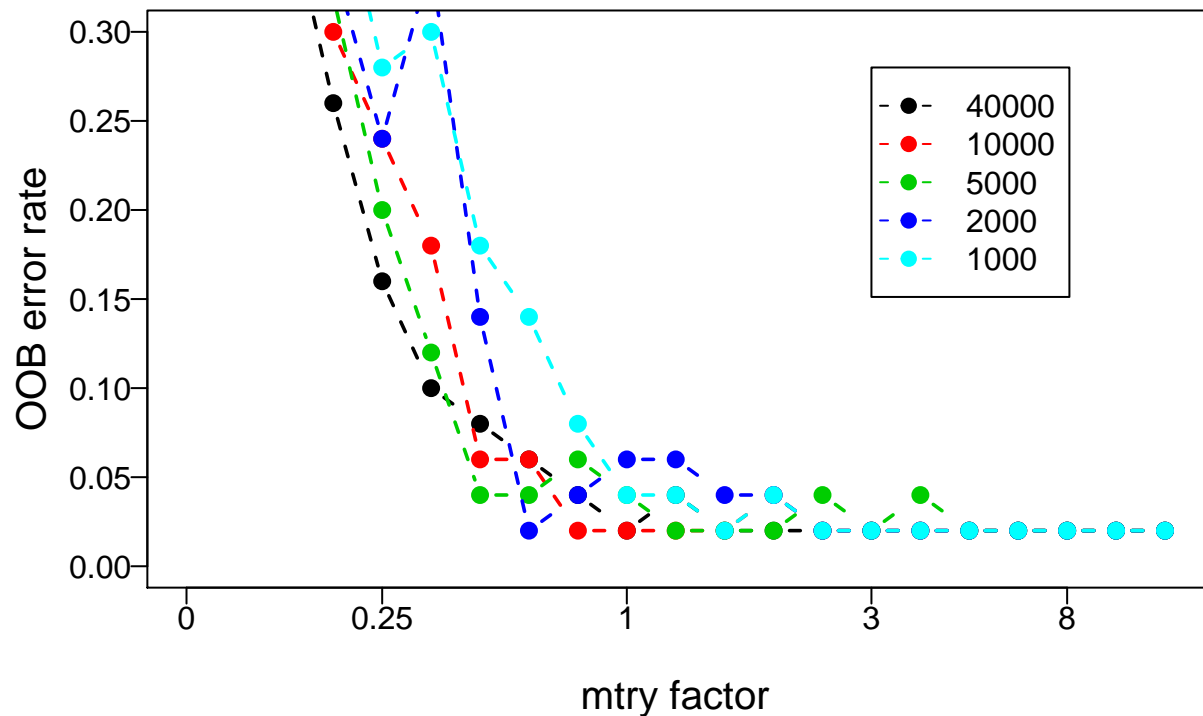

2 classes; 1 dimensions; 5 genes/dimen.; nodesize = 5

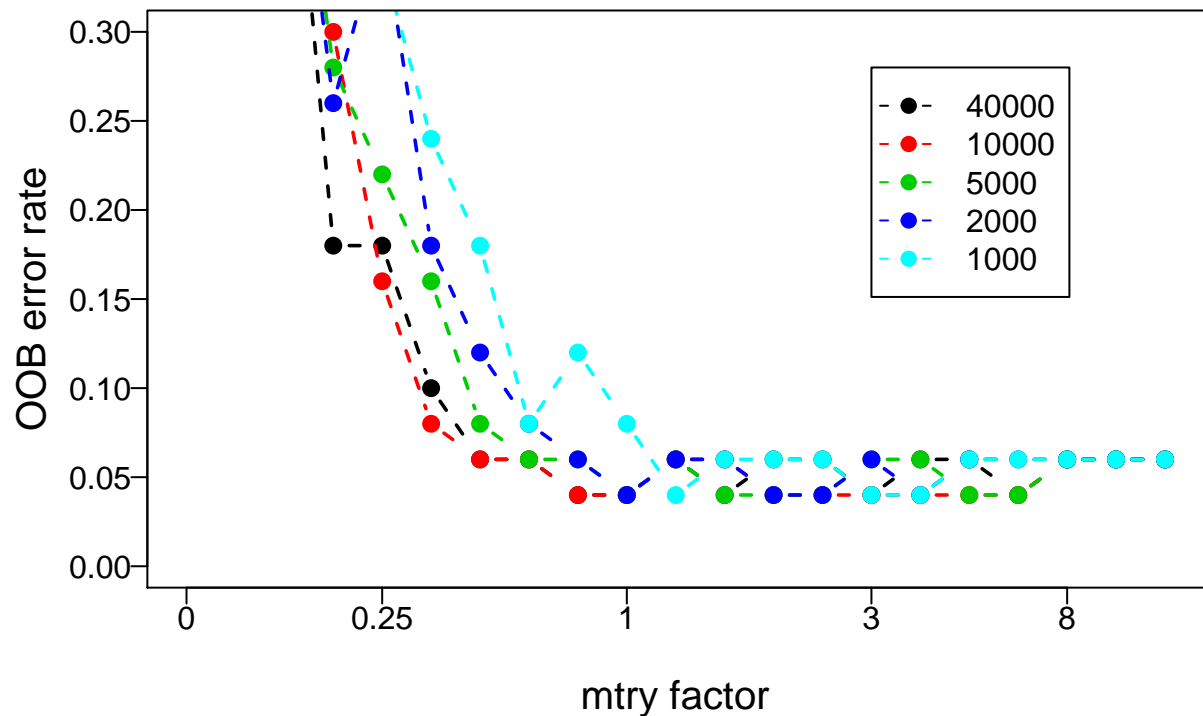

2 classes; 1 dimensions; 20 genes/dimen.; nodesize = 5

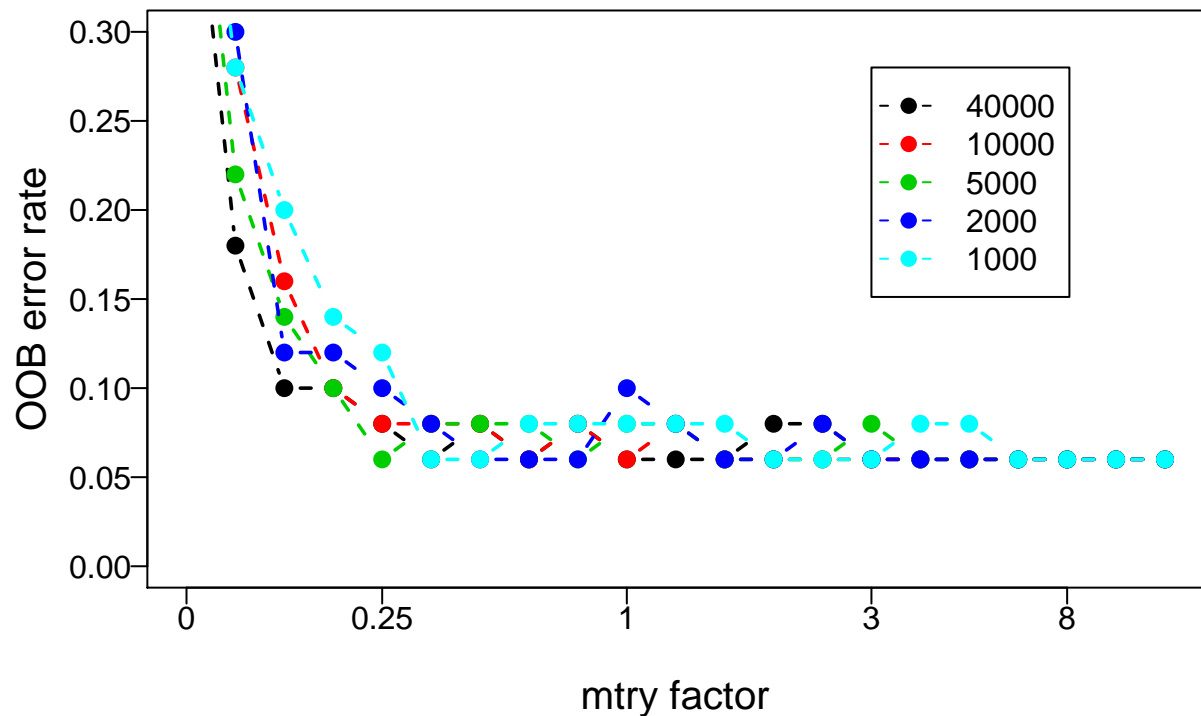

2 classes; 1 dimensions; 20 genes/dimen.; nodesize = 5

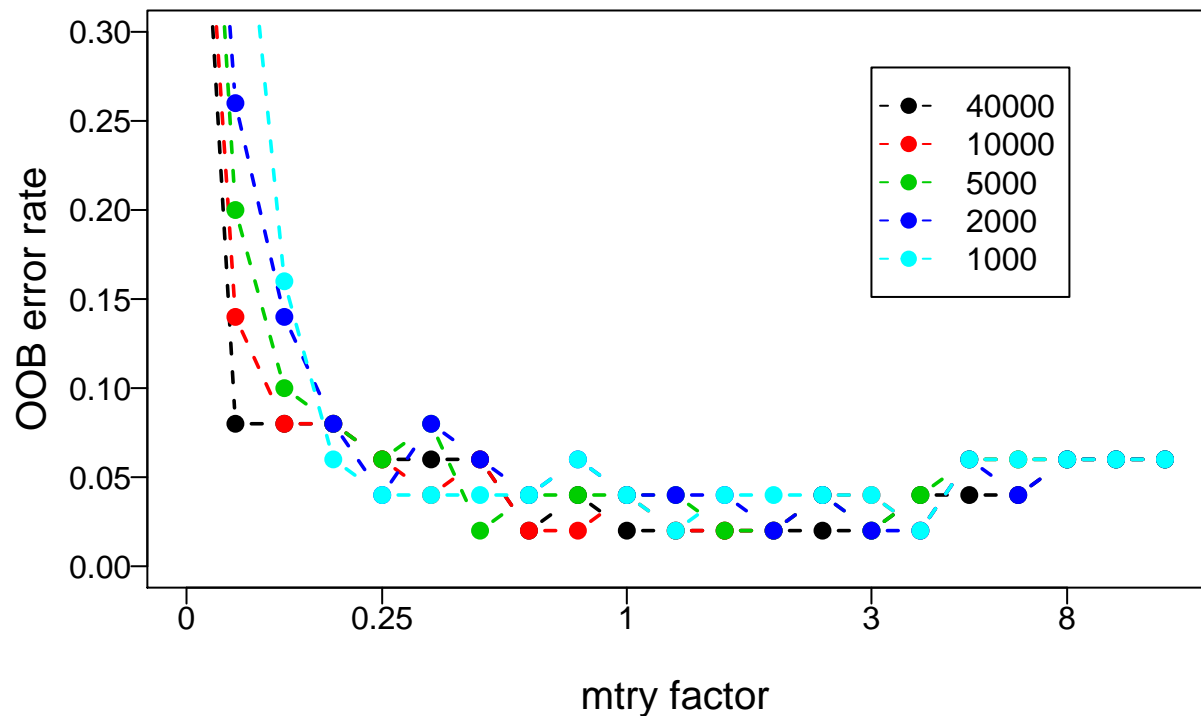

2 classes; 1 dimensions; 20 genes/dimen.; nodesize = 5

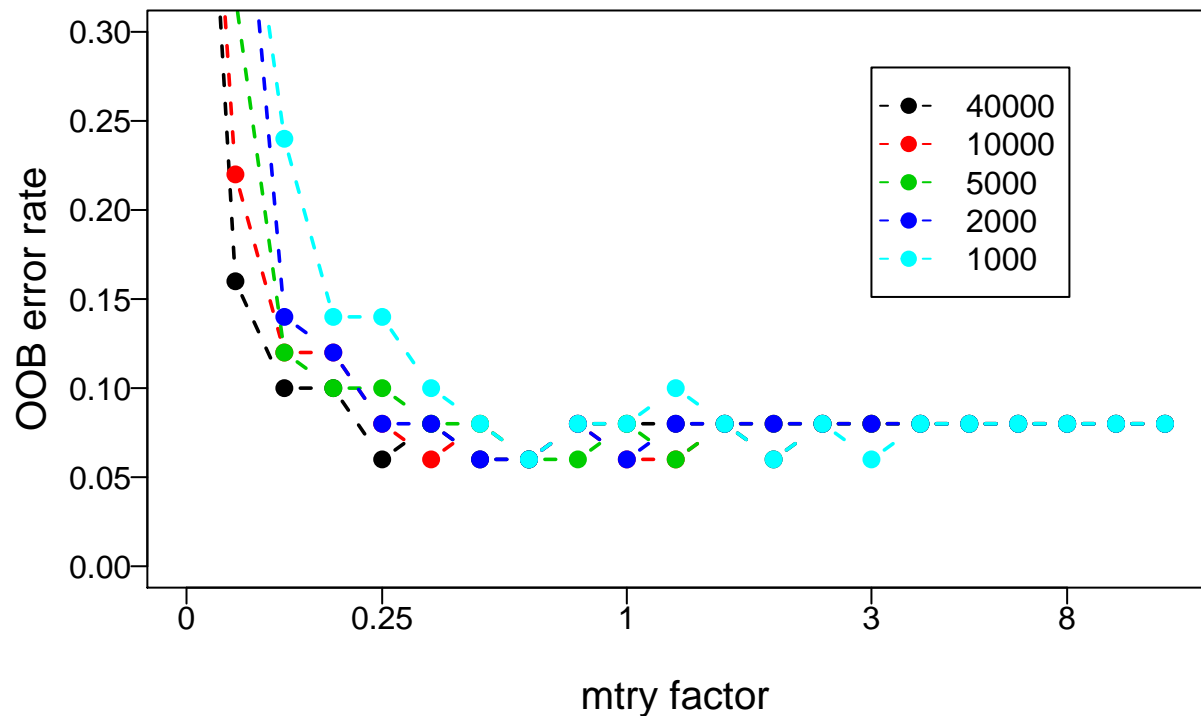

2 classes; 1 dimensions; 20 genes/dimen.; nodesize = 5

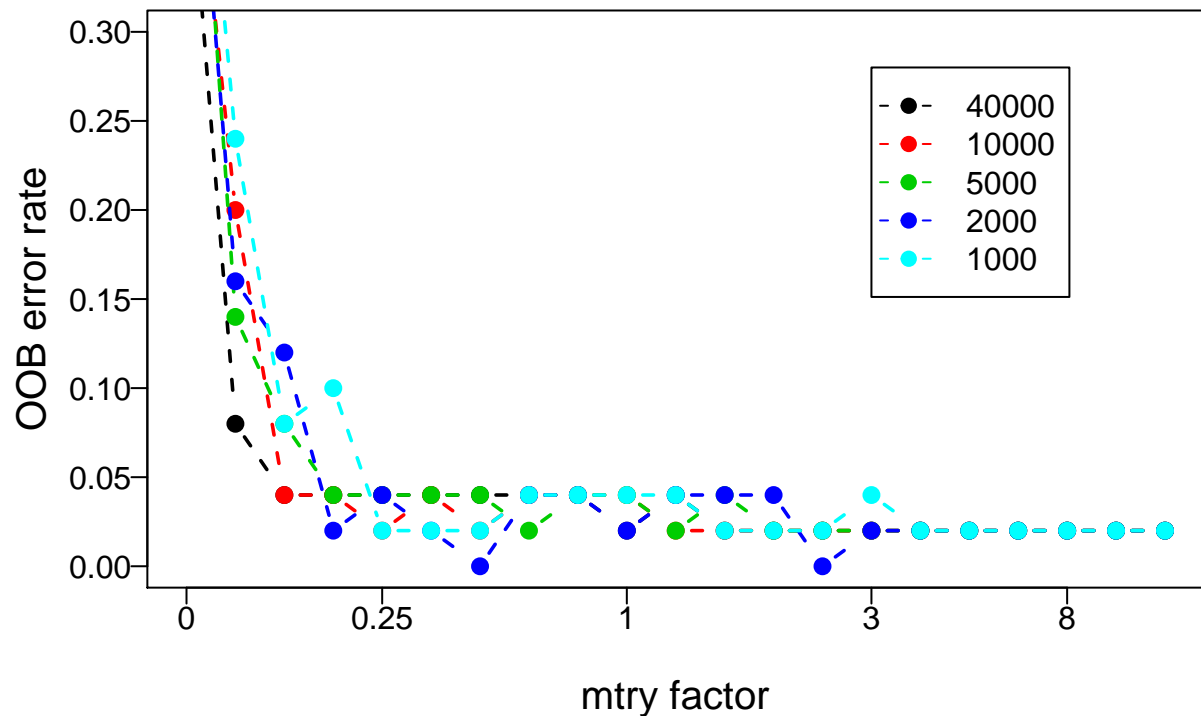

2 classes; 1 dimensions; 100 genes/dimen.; nodesize = 5

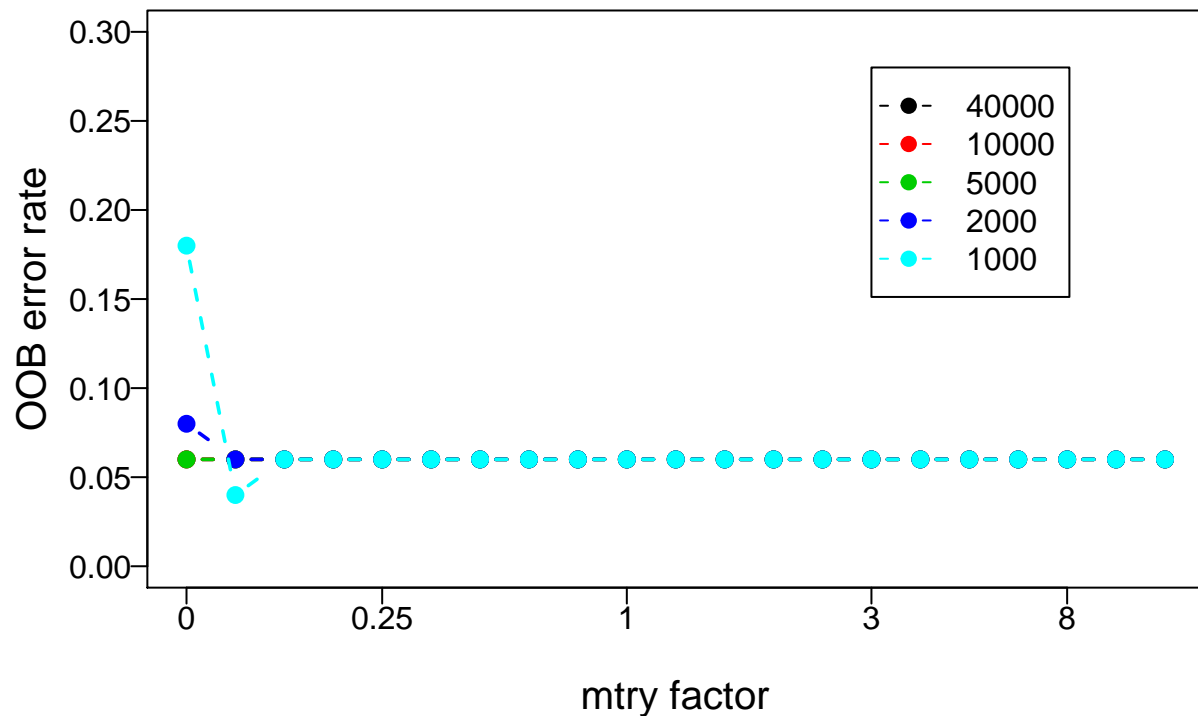

2 classes; 1 dimensions; 100 genes/dimen.; nodesize = 5

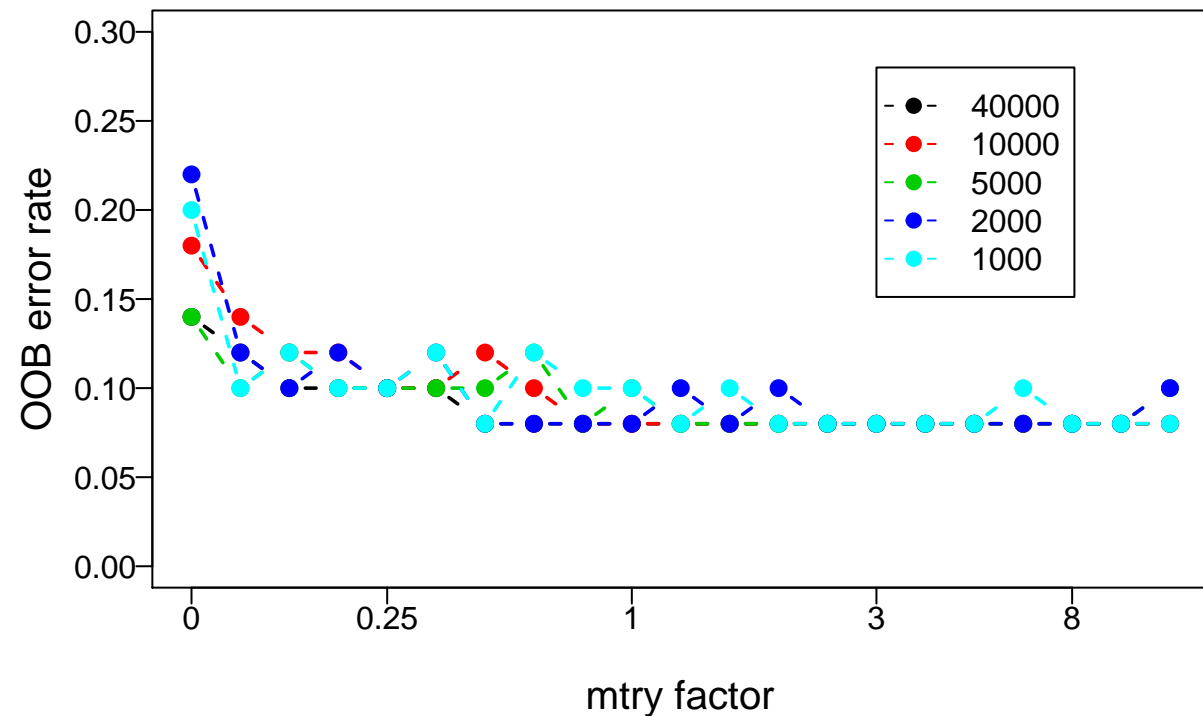

2 classes; 1 dimensions; 100 genes/dimen.; nodesize = 5

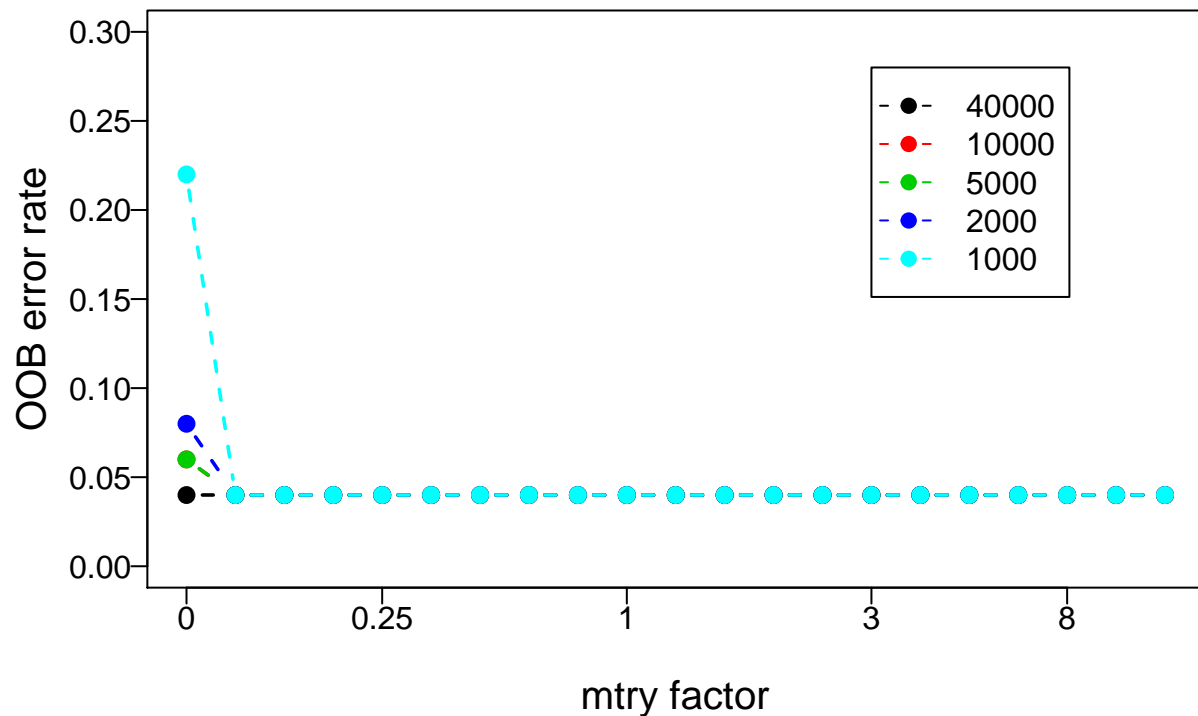

2 classes; 1 dimensions; 100 genes/dimen.; nodesize = 5

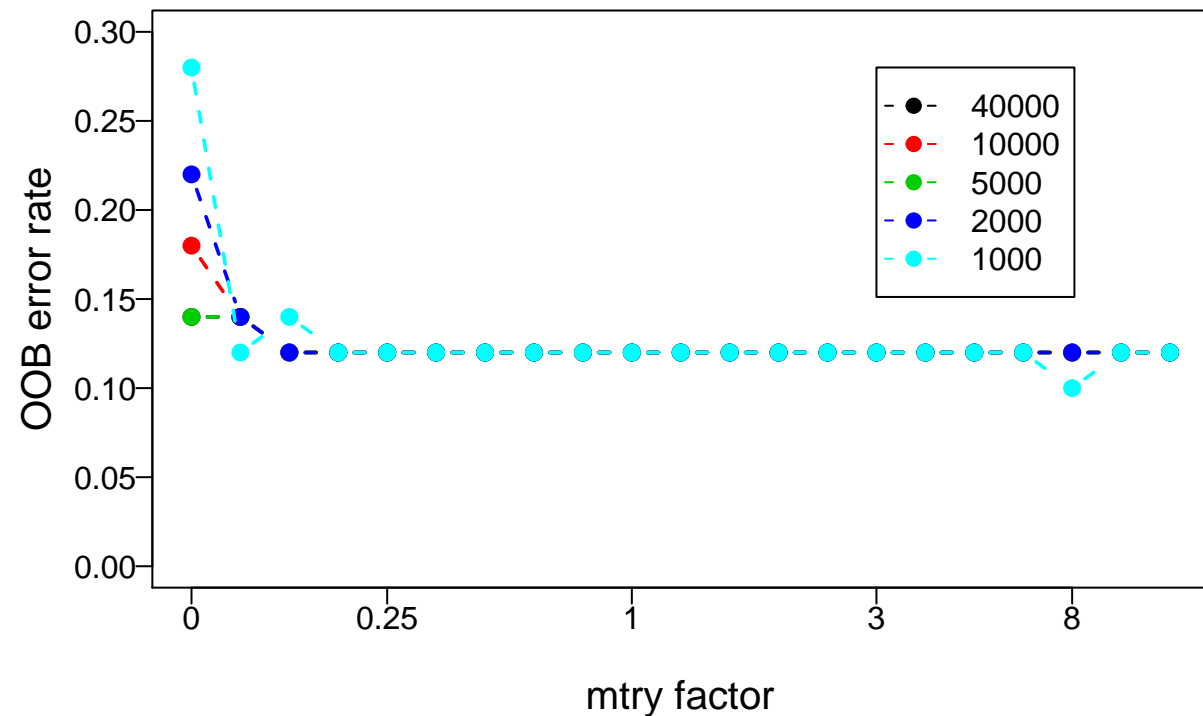

2 classes; 2 dimensions; 5 genes/dimen.; nodelist = 5

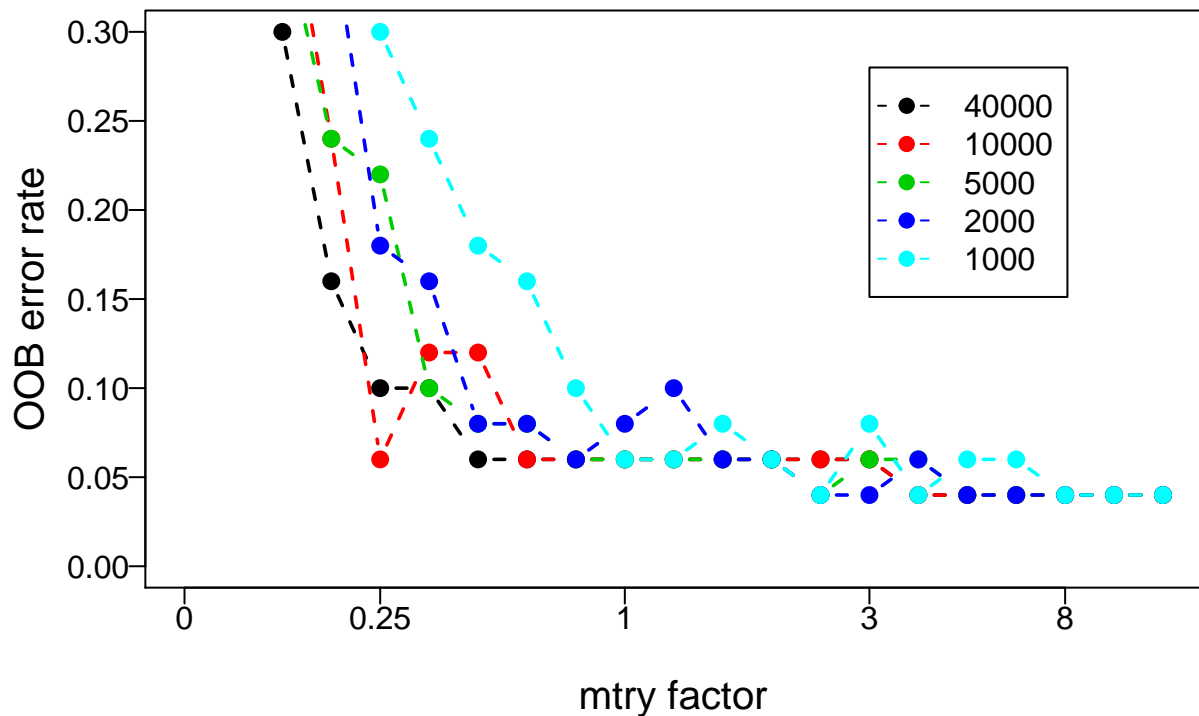

2 classes; 2 dimensions; 5 genes/dimen.; nodelist = 5

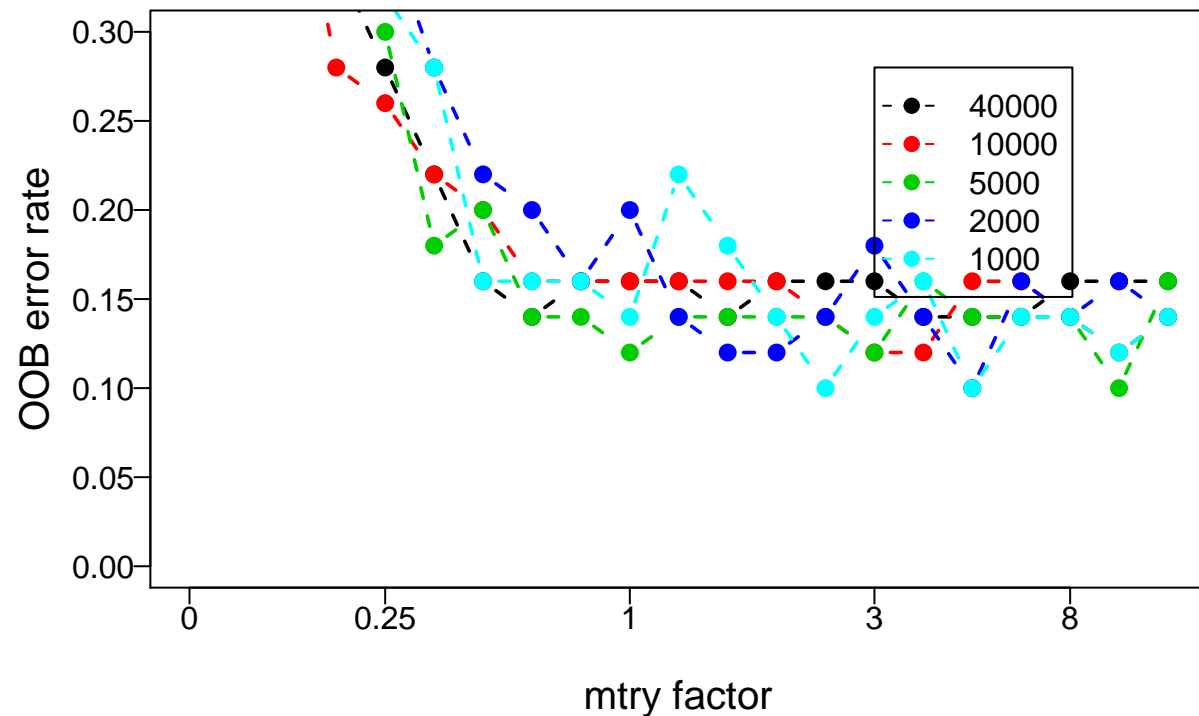

2 classes; 2 dimensions; 5 genes/dimen.; nodelist = 5

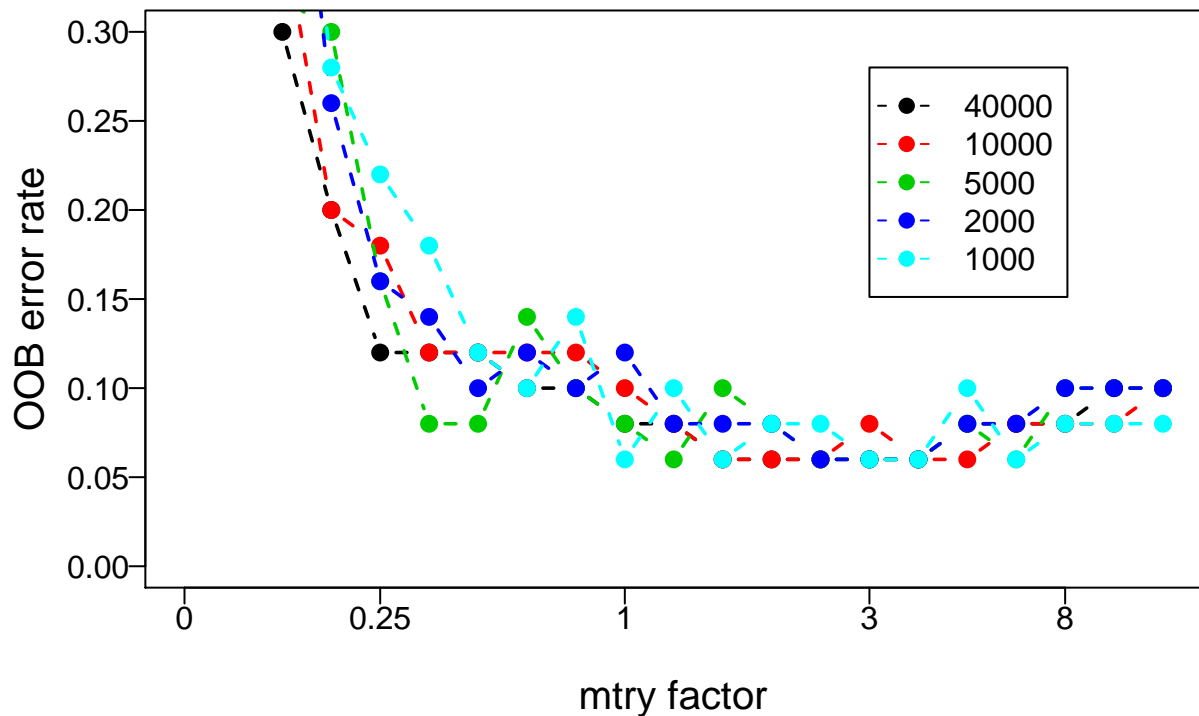

2 classes; 2 dimensions; 5 genes/dimen.; nodelist = 5

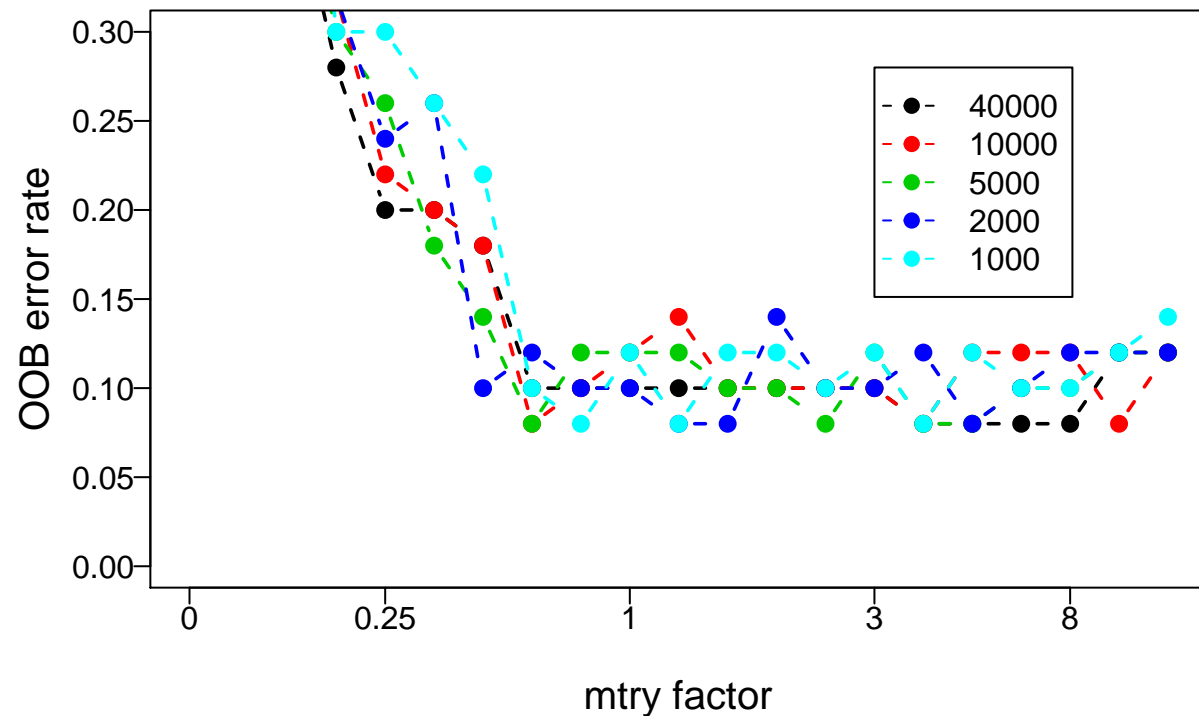



2 classes; 2 dimensions; 20 genes/dimen.; nodesize = 5

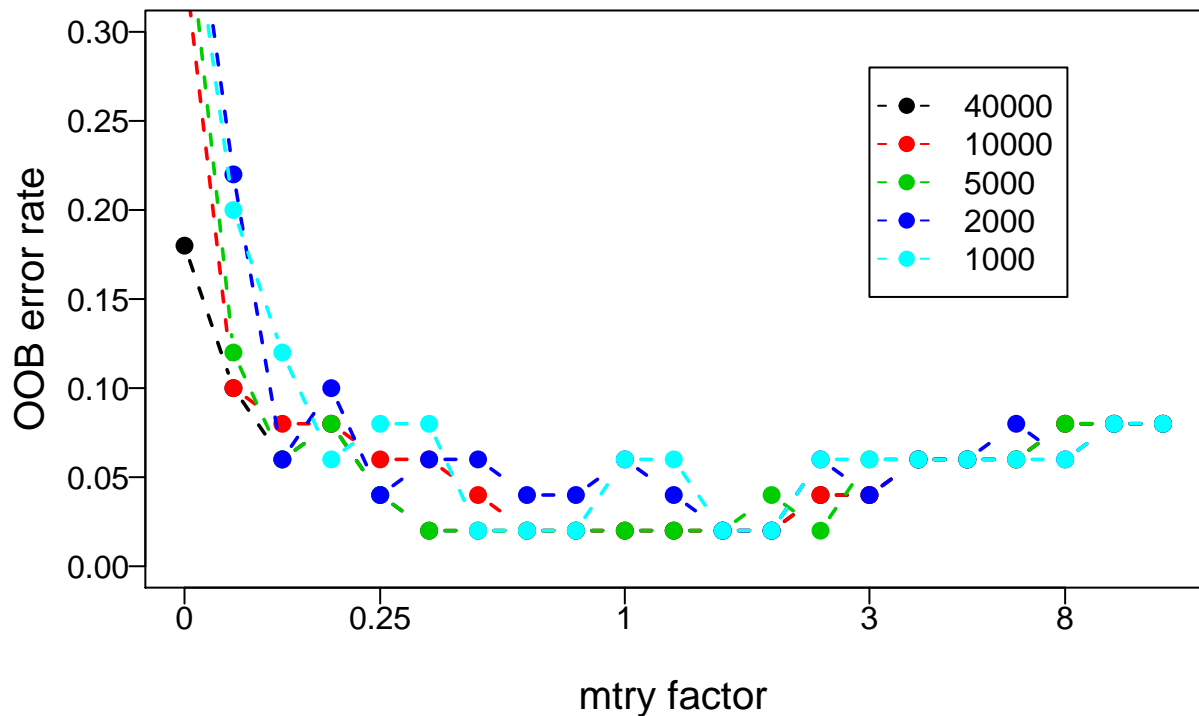

2 classes; 2 dimensions; 20 genes/dimen.; nodesize = 5

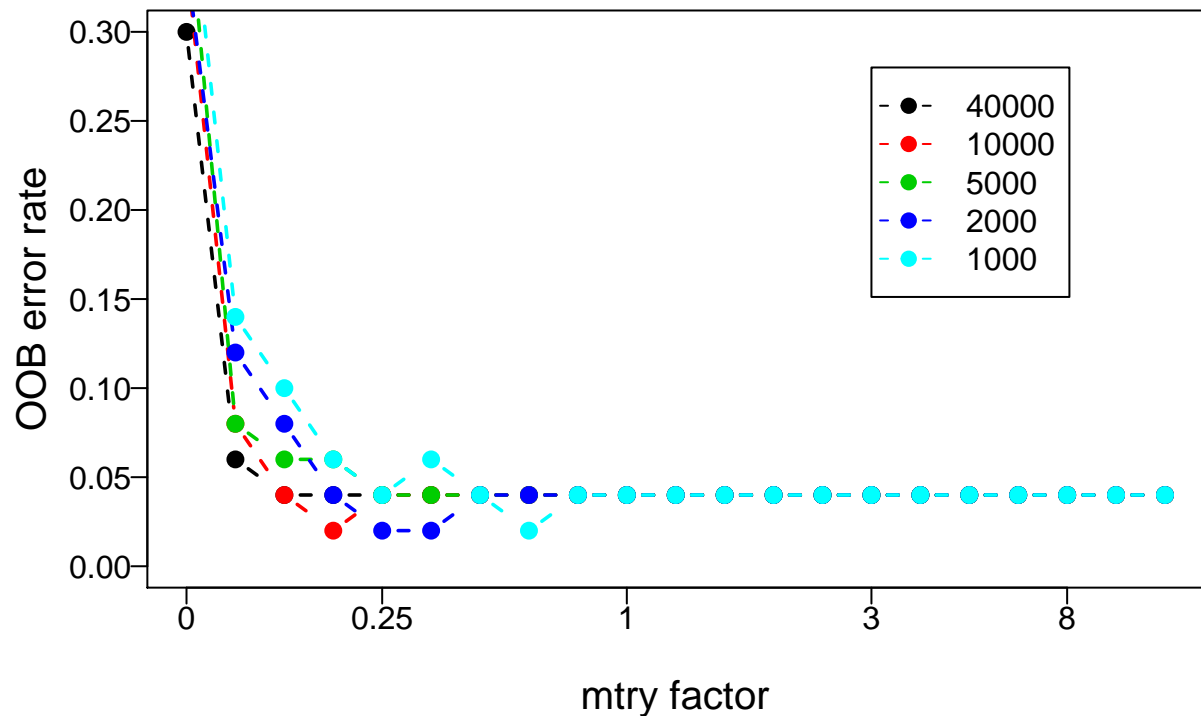

2 classes; 2 dimensions; 20 genes/dimen.; nodesize = 5

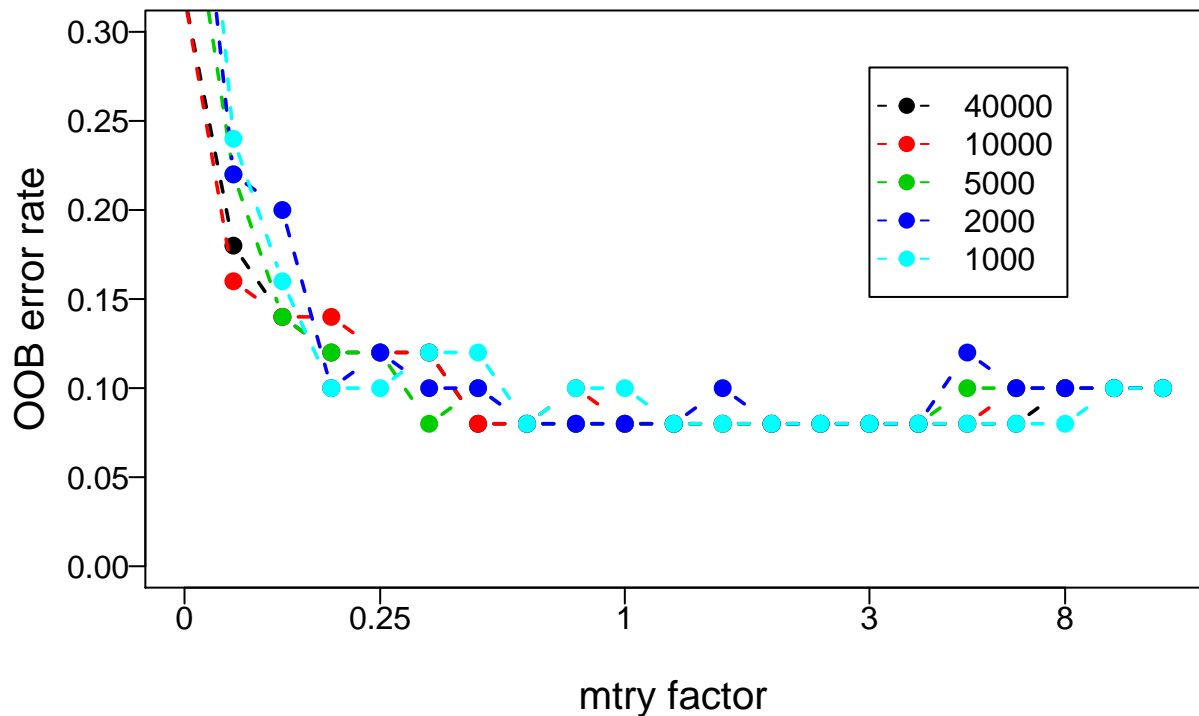

2 classes; 2 dimensions; 20 genes/dimen.; nodesize = 5

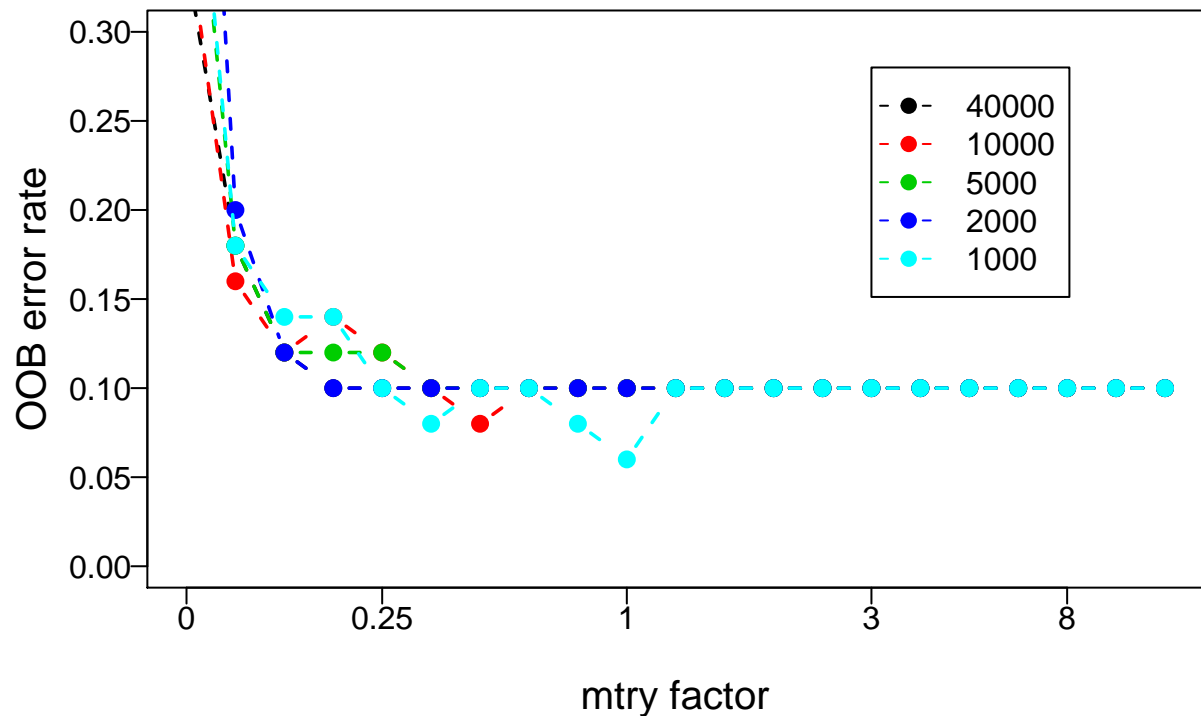

2 classes; 2 dimensions; 100 genes/dimen.; nodesize = 5

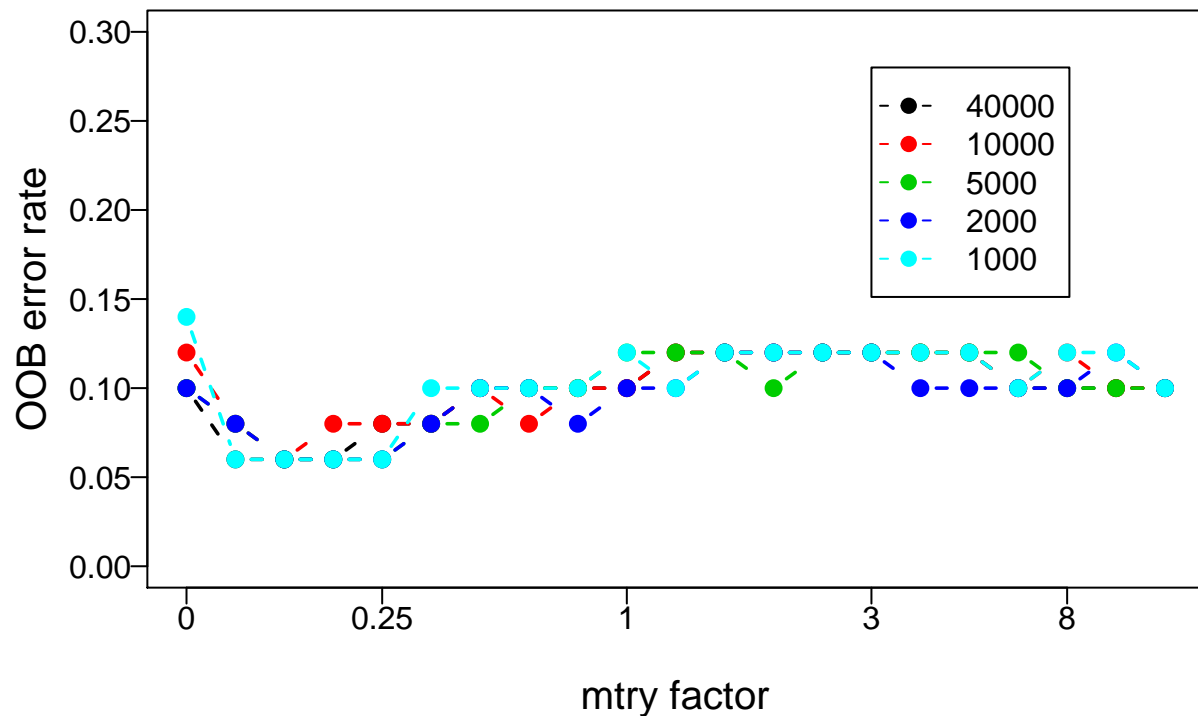

2 classes; 2 dimensions; 100 genes/dimen.; nodesize = 5

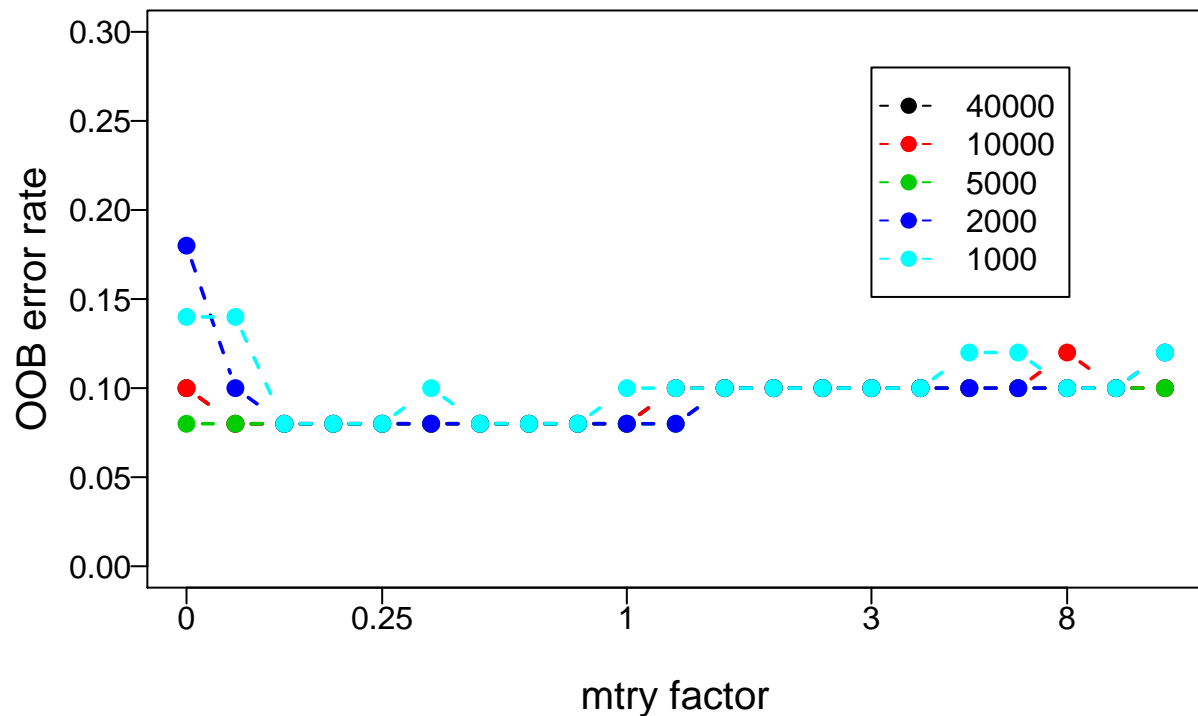

2 classes; 2 dimensions; 100 genes/dimen.; nodesize = 5

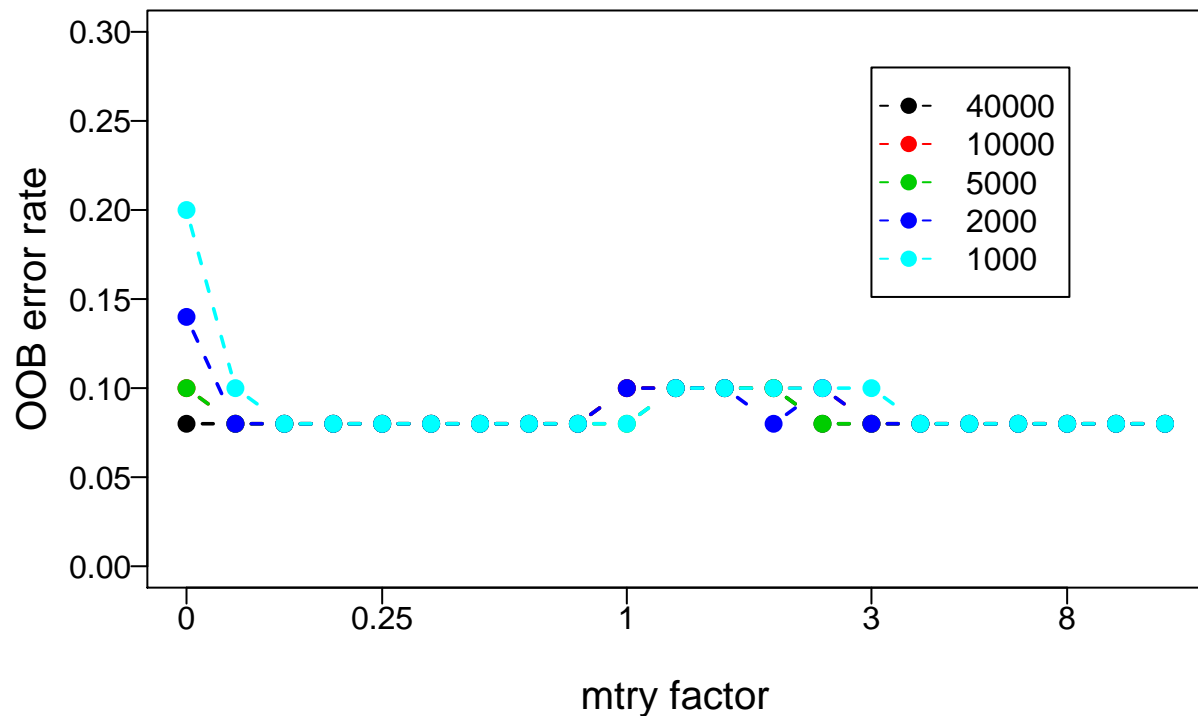

2 classes; 2 dimensions; 100 genes/dimen.; nodesize = 5

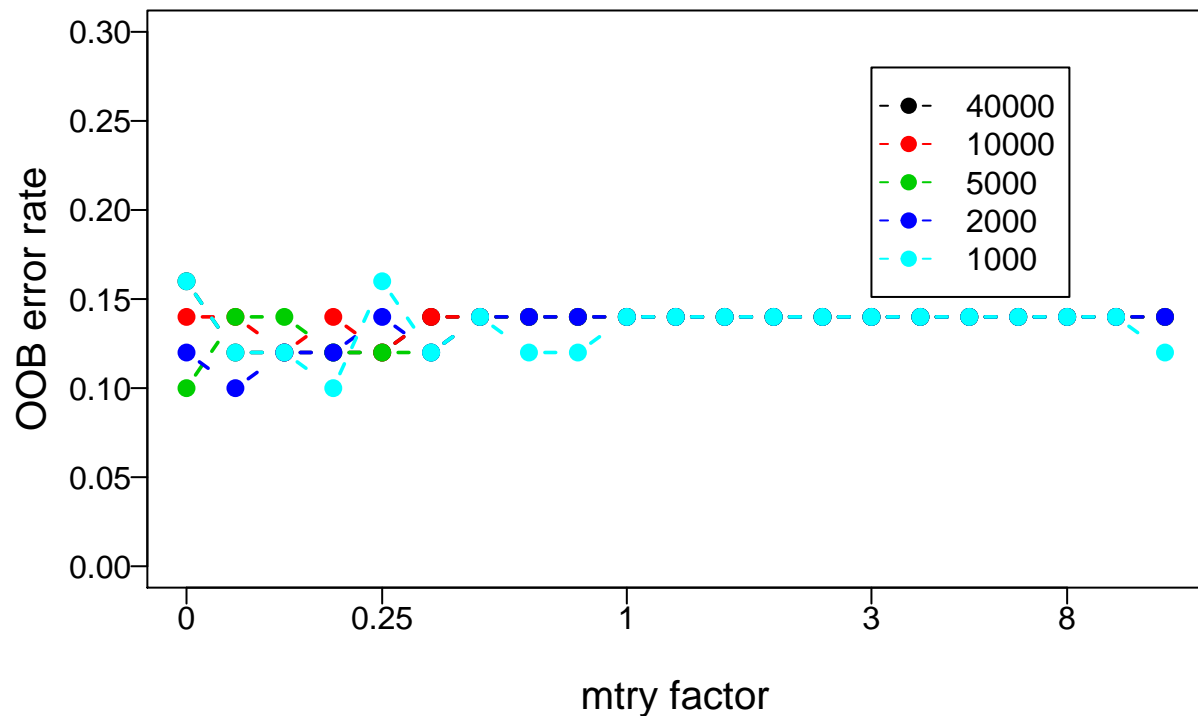

2 classes; 3 dimensions; 5 genes/dimen.; nodesize = 5

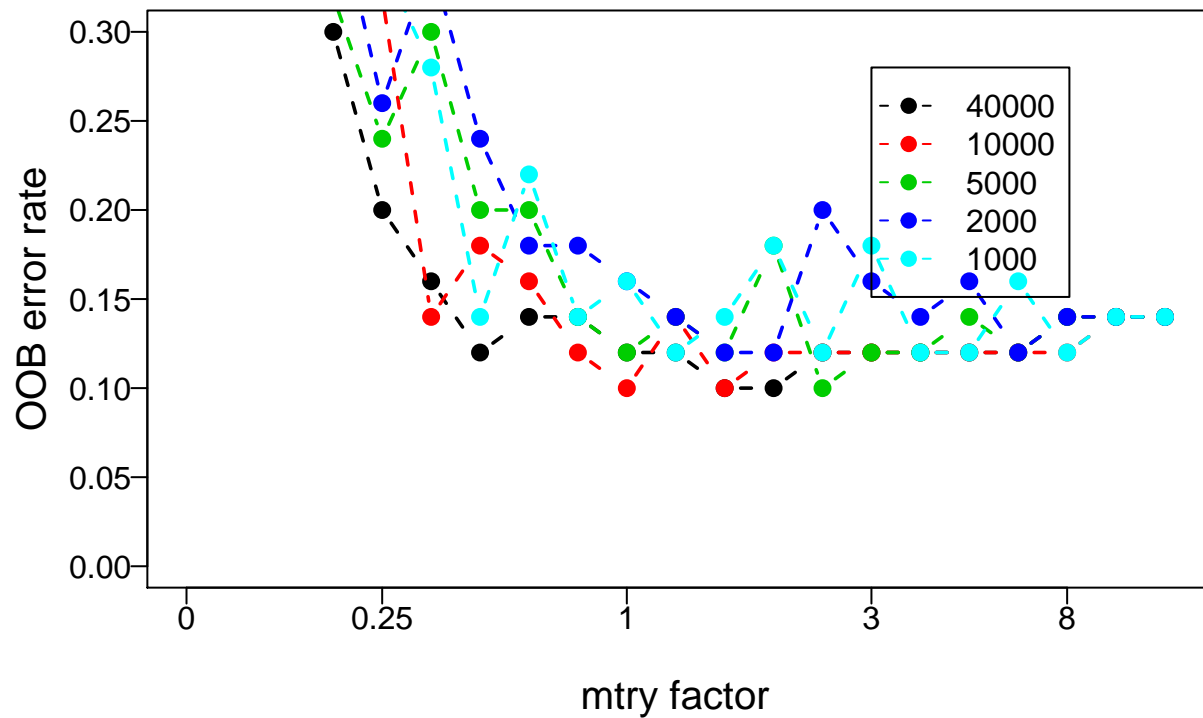

2 classes; 3 dimensions; 5 genes/dimen.; nodesize = 5

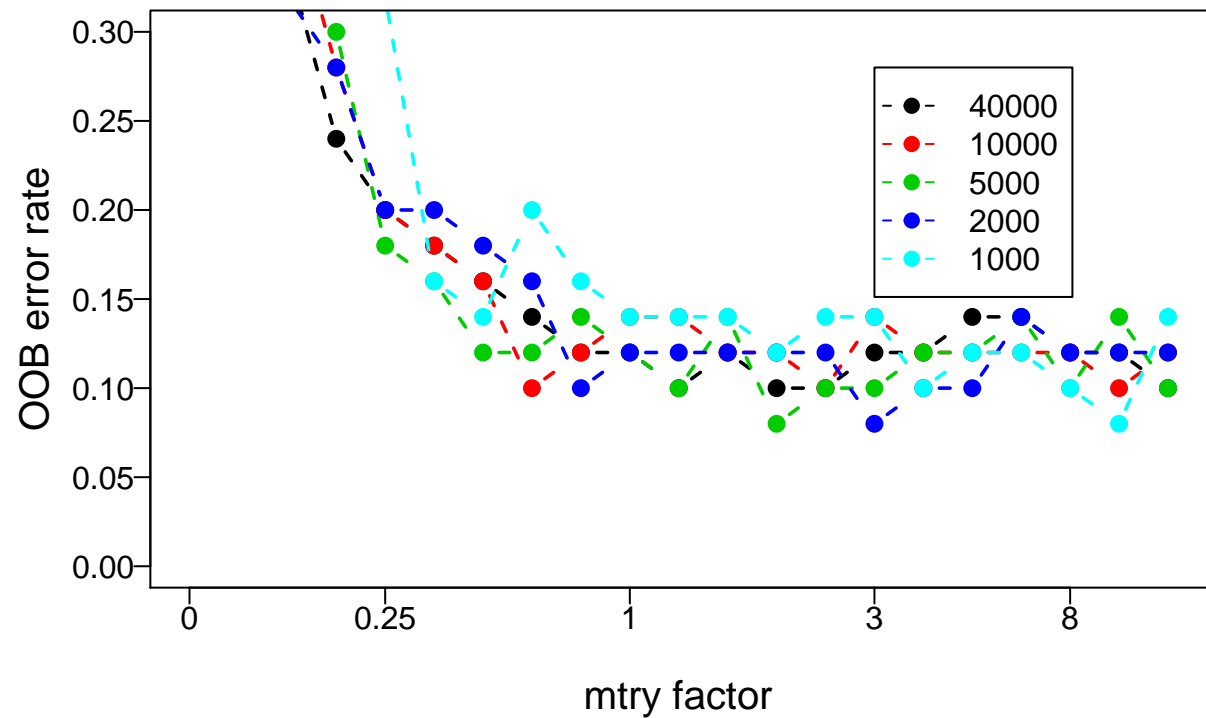

2 classes; 3 dimensions; 5 genes/dimen.; nodesize = 5

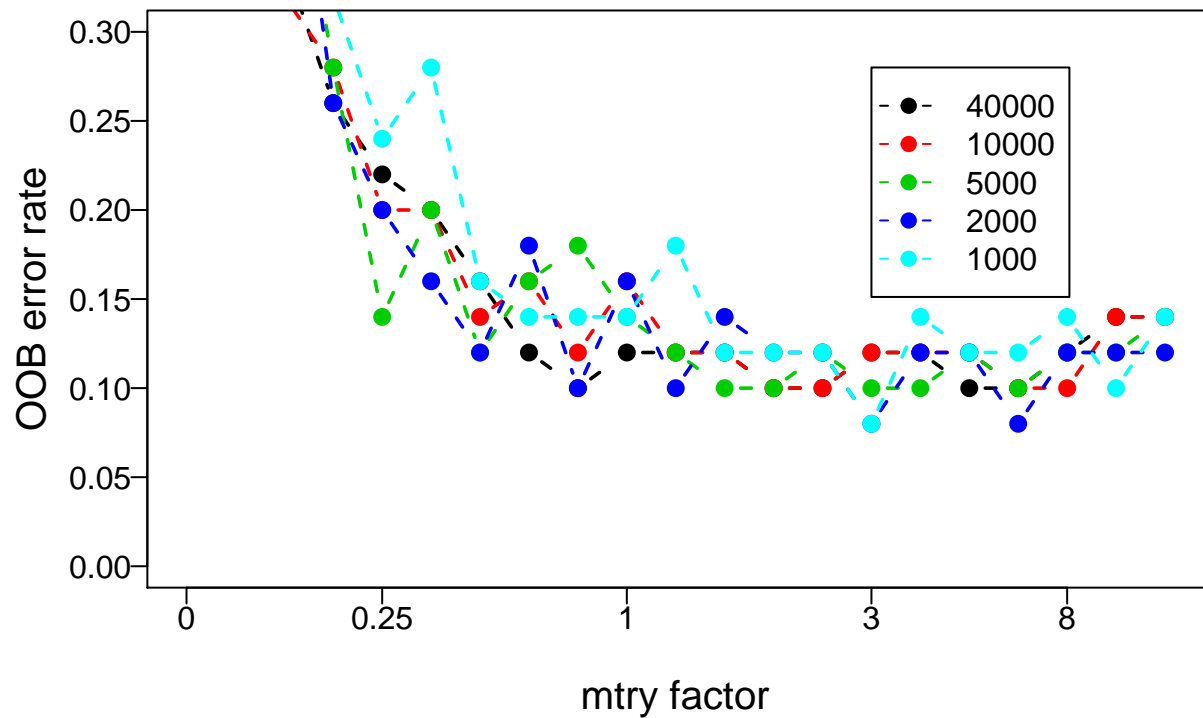

2 classes; 3 dimensions; 5 genes/dimen.; nodesize = 5

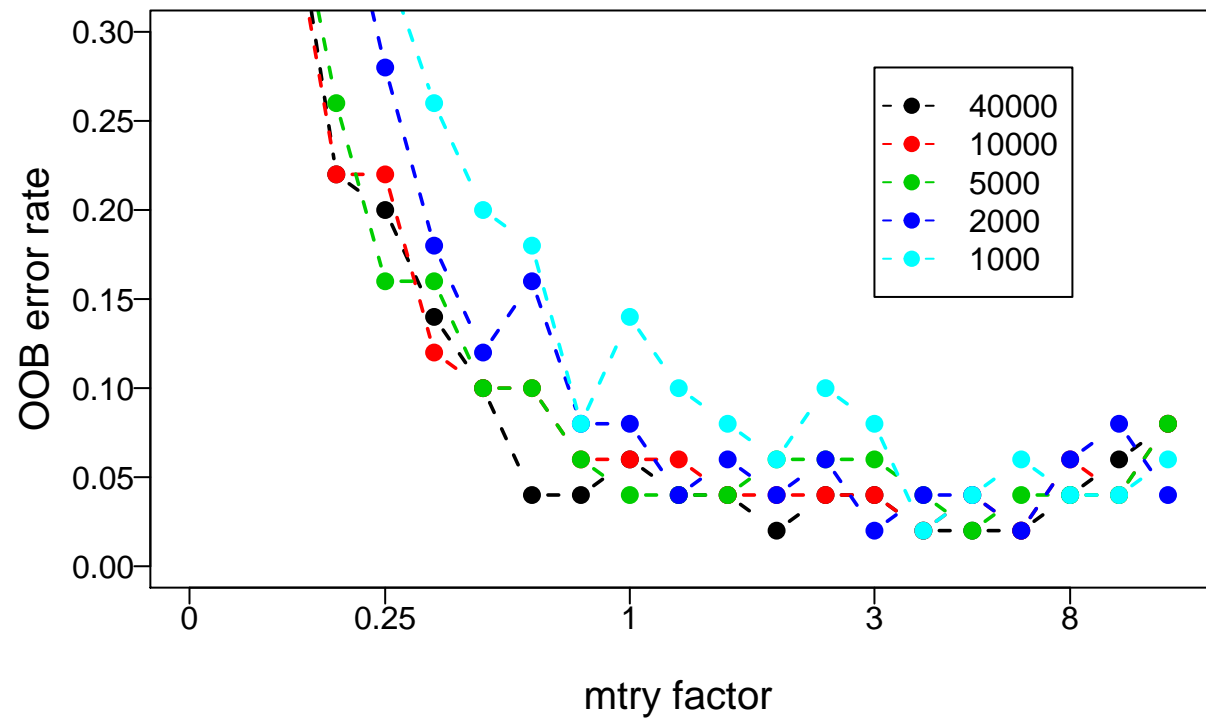

2 classes; 3 dimensions; 20 genes/dimen.; nodesize = 5

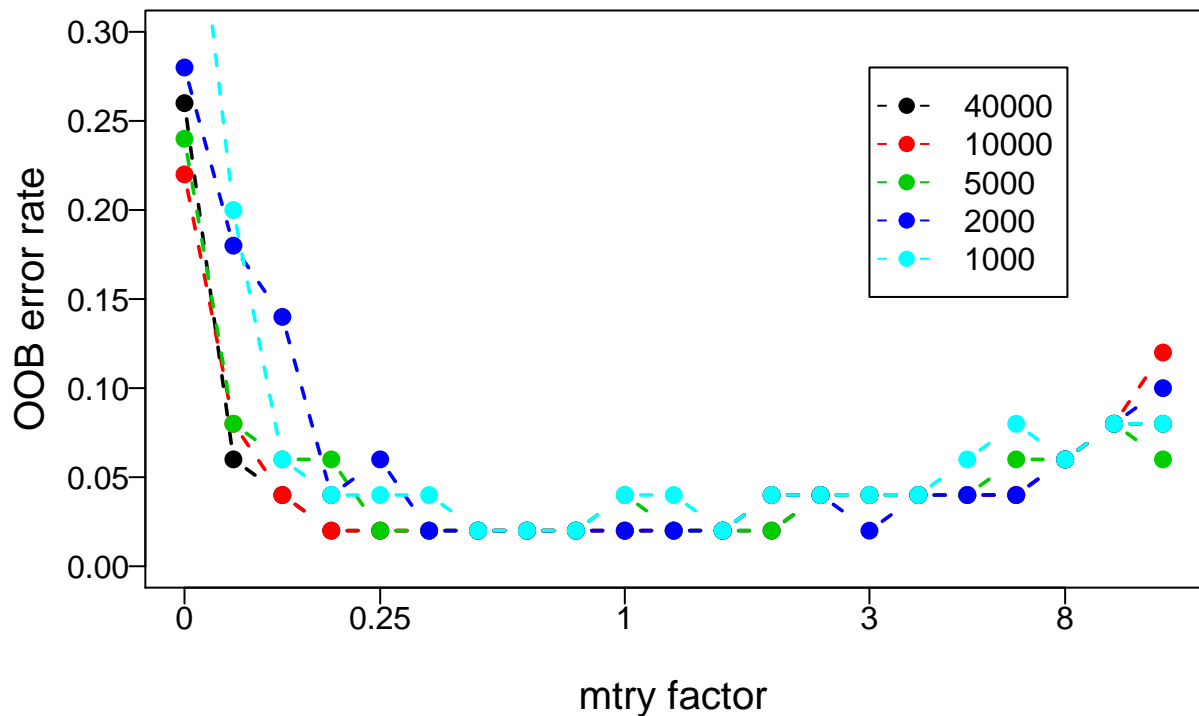

2 classes; 3 dimensions; 20 genes/dimen.; nodesize = 5

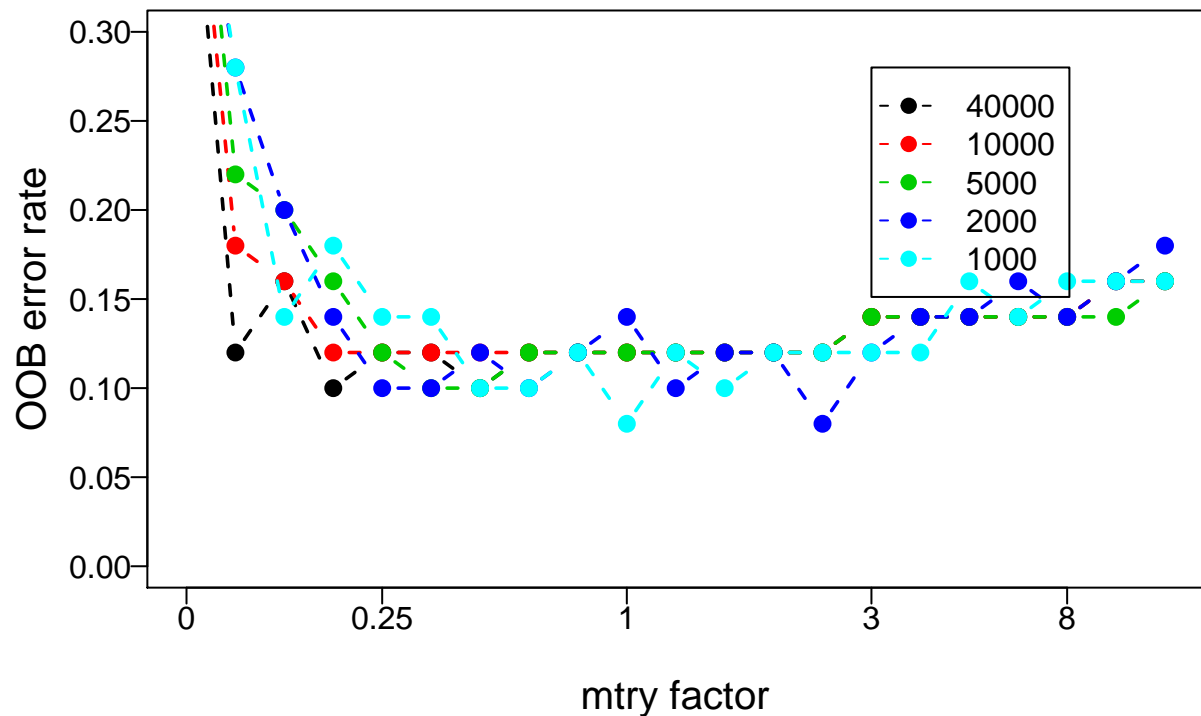

2 classes; 3 dimensions; 20 genes/dimen.; nodesize = 5

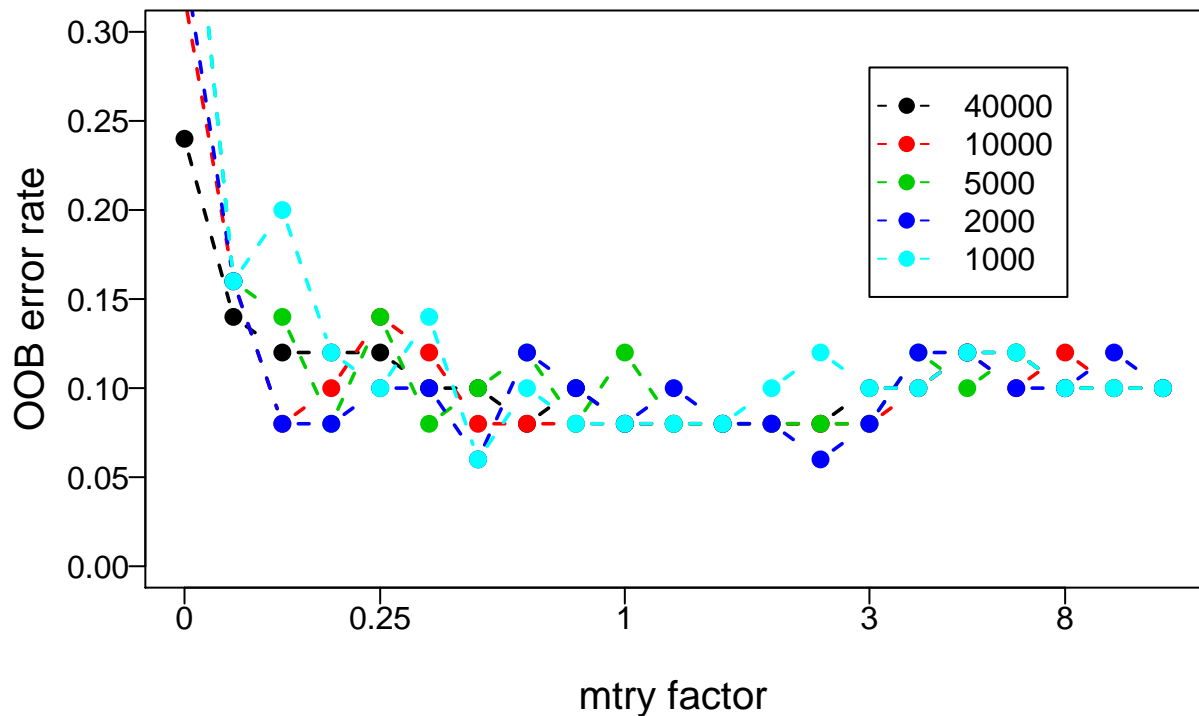

2 classes; 3 dimensions; 20 genes/dimen.; nodesize = 5

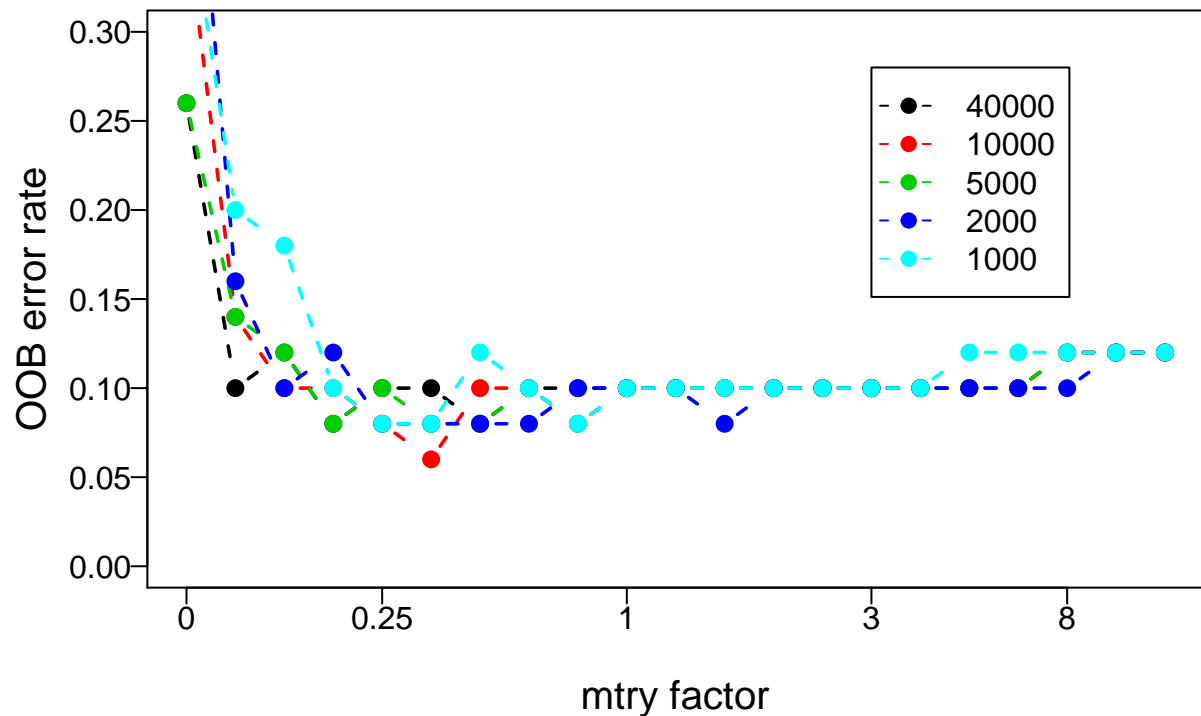

2 classes; 3 dimensions; 100 genes/dimen.; nodesize = 5

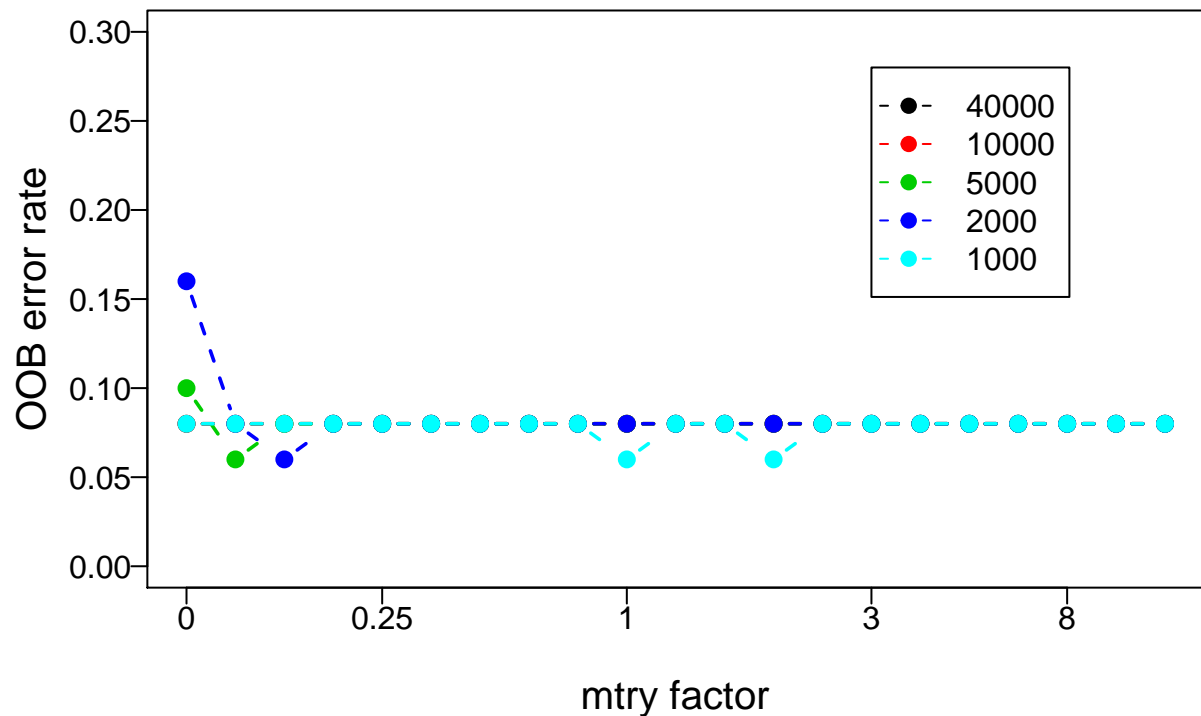

2 classes; 3 dimensions; 100 genes/dimen.; nodesize = 5

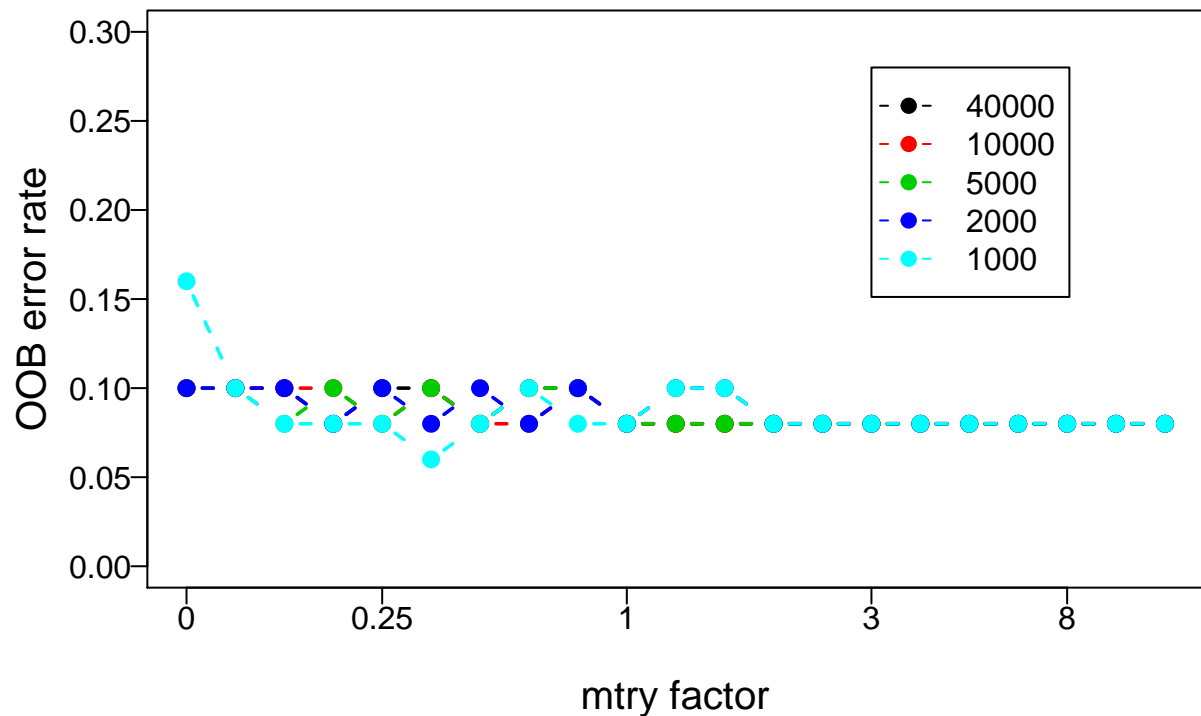

2 classes; 3 dimensions; 100 genes/dimen.; nodesize = 5

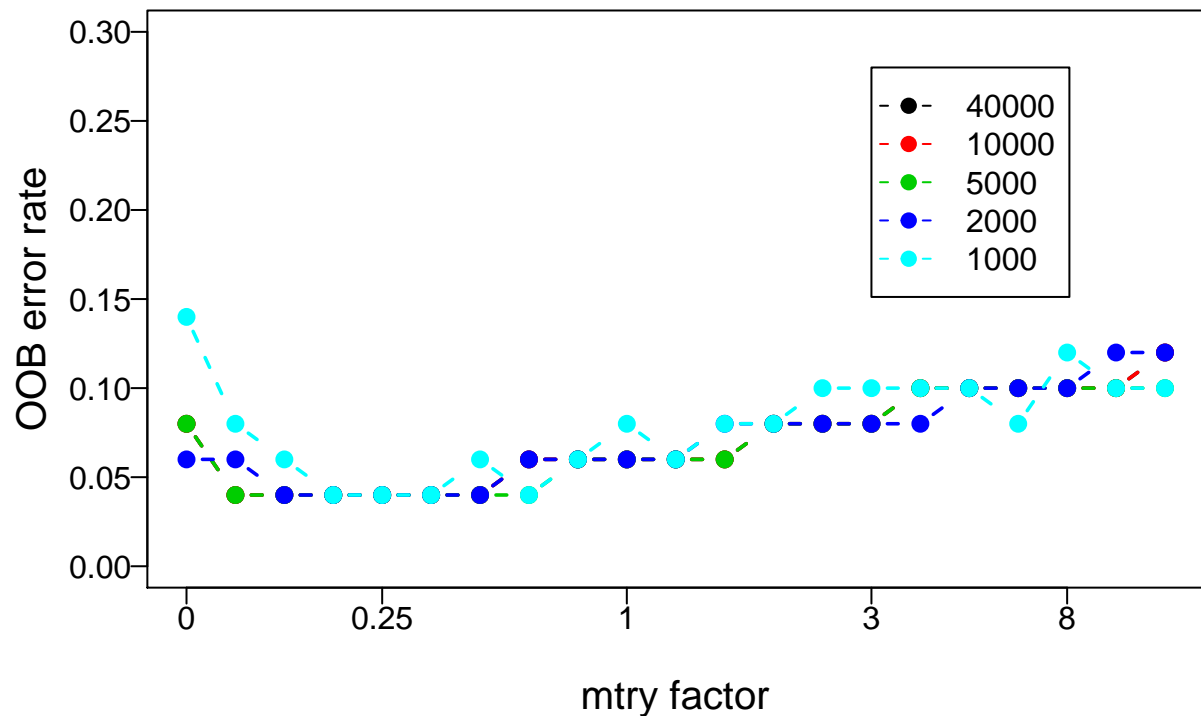

2 classes; 3 dimensions; 100 genes/dimen.; nodesize = 5

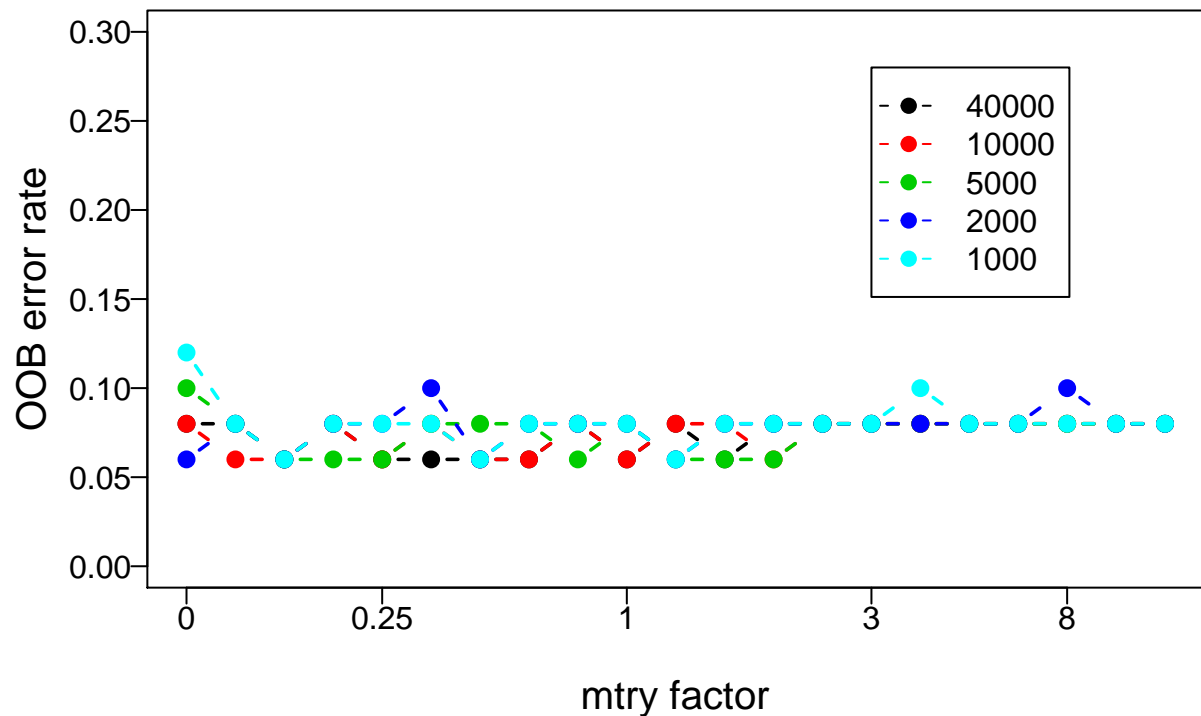

3 classes; 1 dimensions; 5 genes/dimen.; nodesize = 5

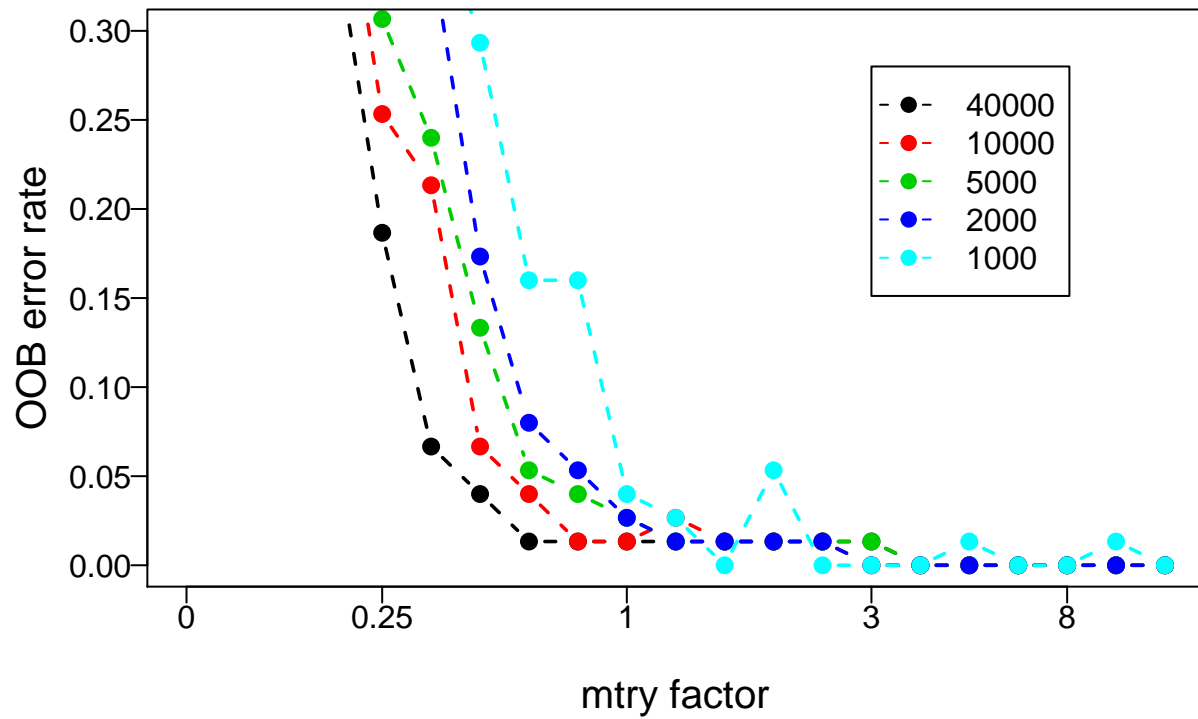

3 classes; 1 dimensions; 5 genes/dimen.; nodesize = 5

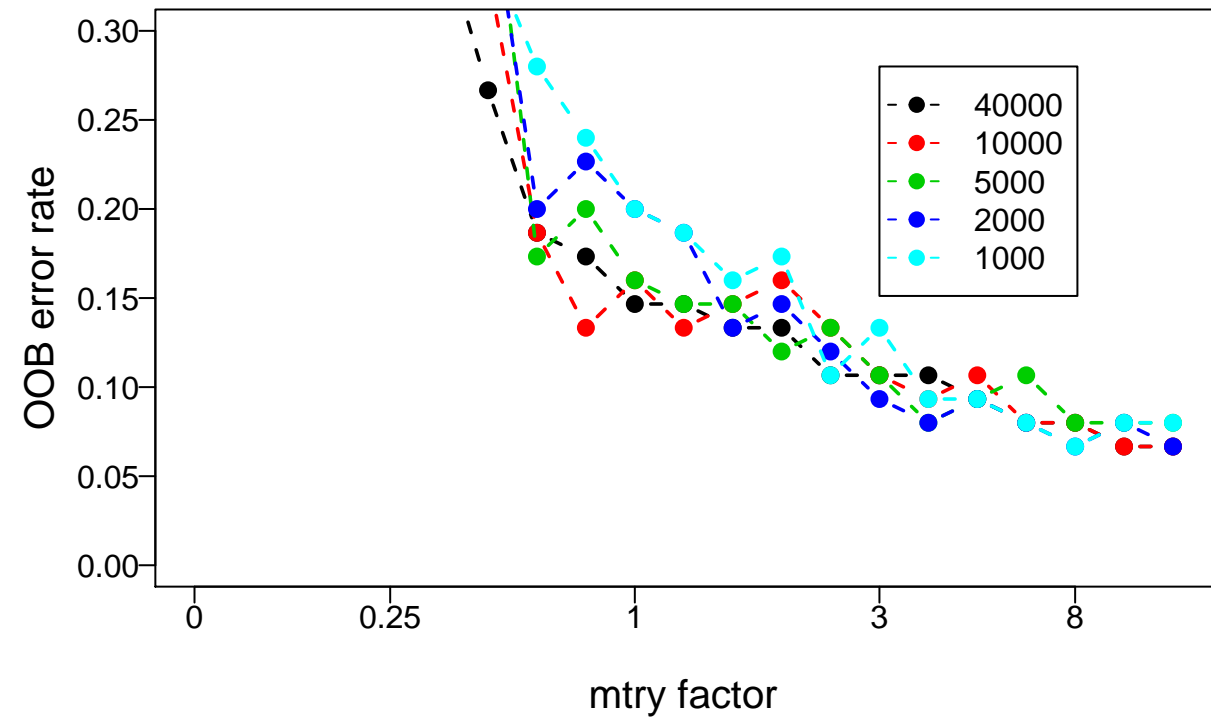

3 classes; 1 dimensions; 5 genes/dimen.; nodesize = 5

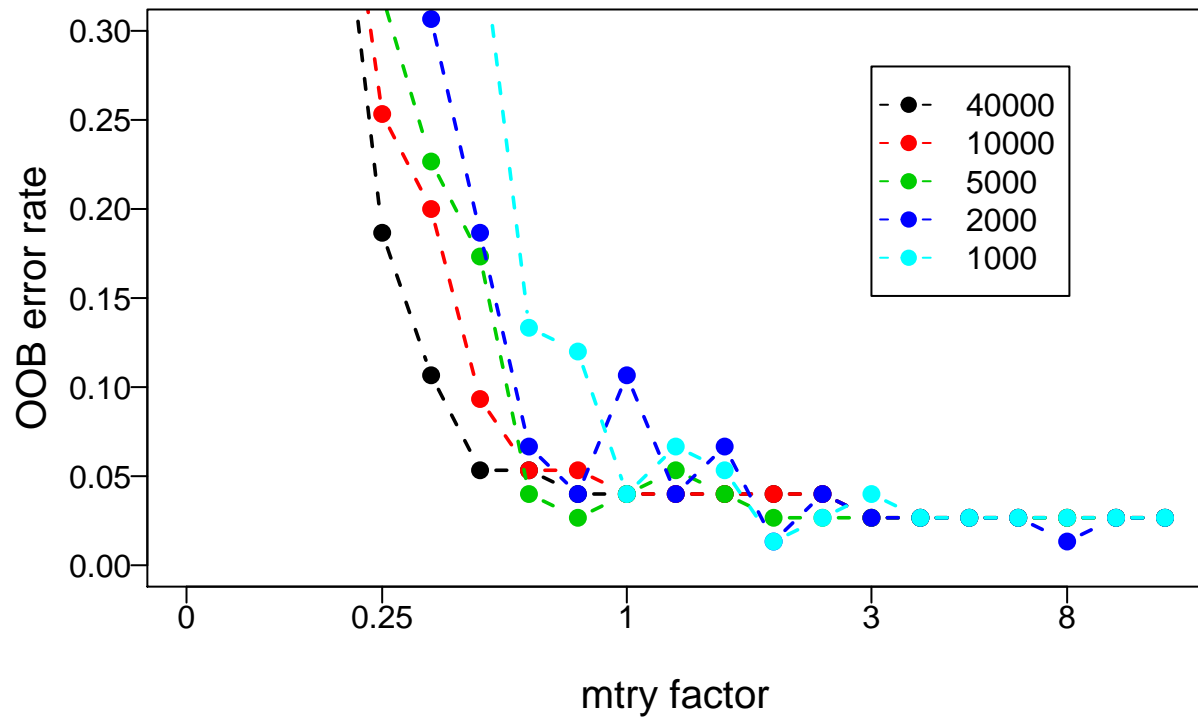

3 classes; 1 dimensions; 5 genes/dimen.; nodesize = 5

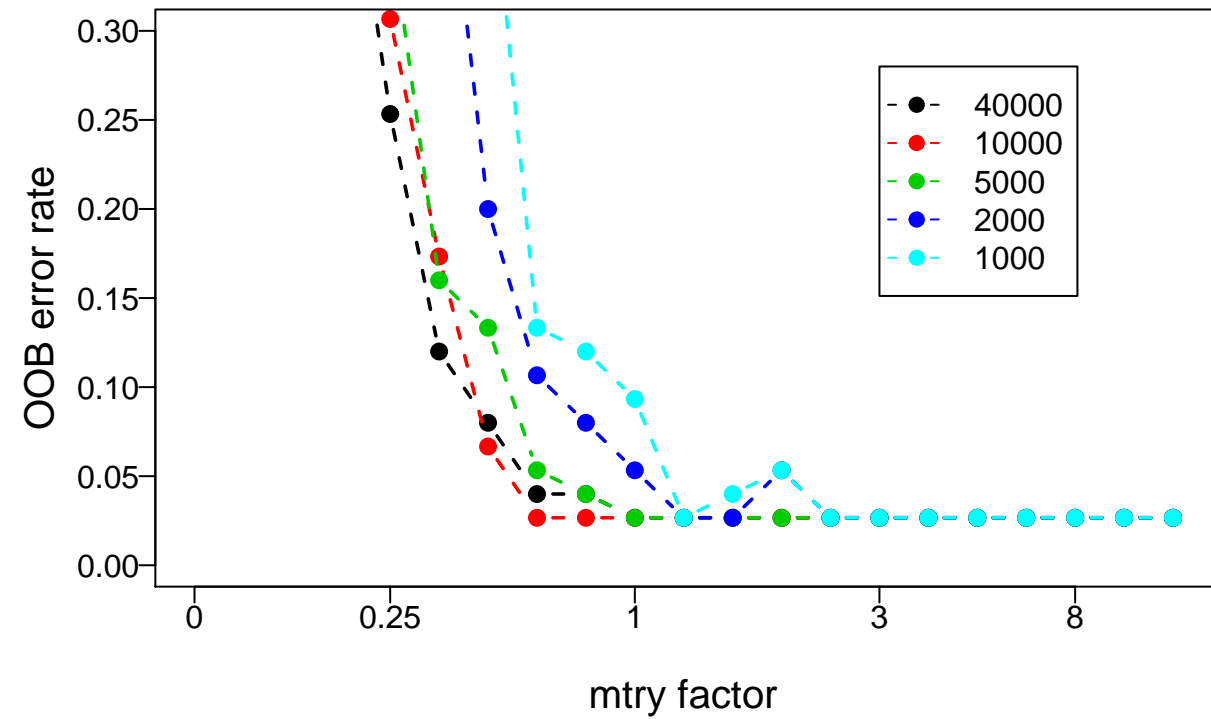

3 classes; 1 dimensions; 20 genes/dimen.; nodesize = 5

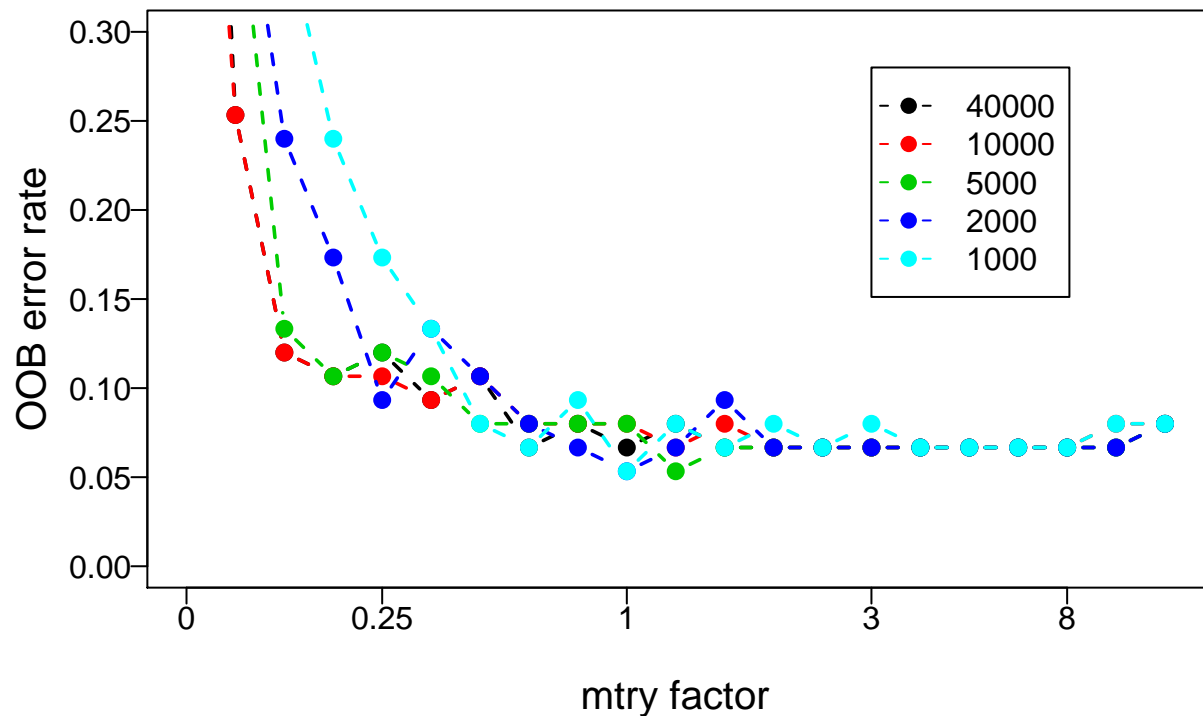

3 classes; 1 dimensions; 20 genes/dimen.; nodesize = 5

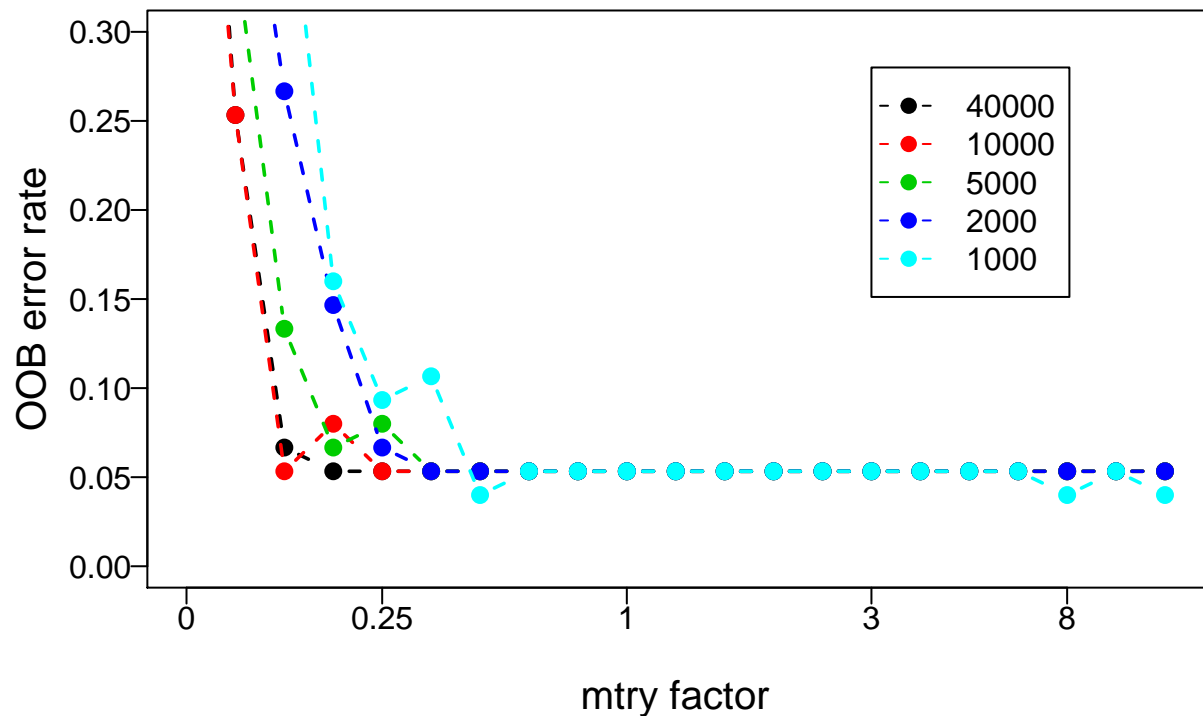

3 classes; 1 dimensions; 20 genes/dimen.; nodesize = 5

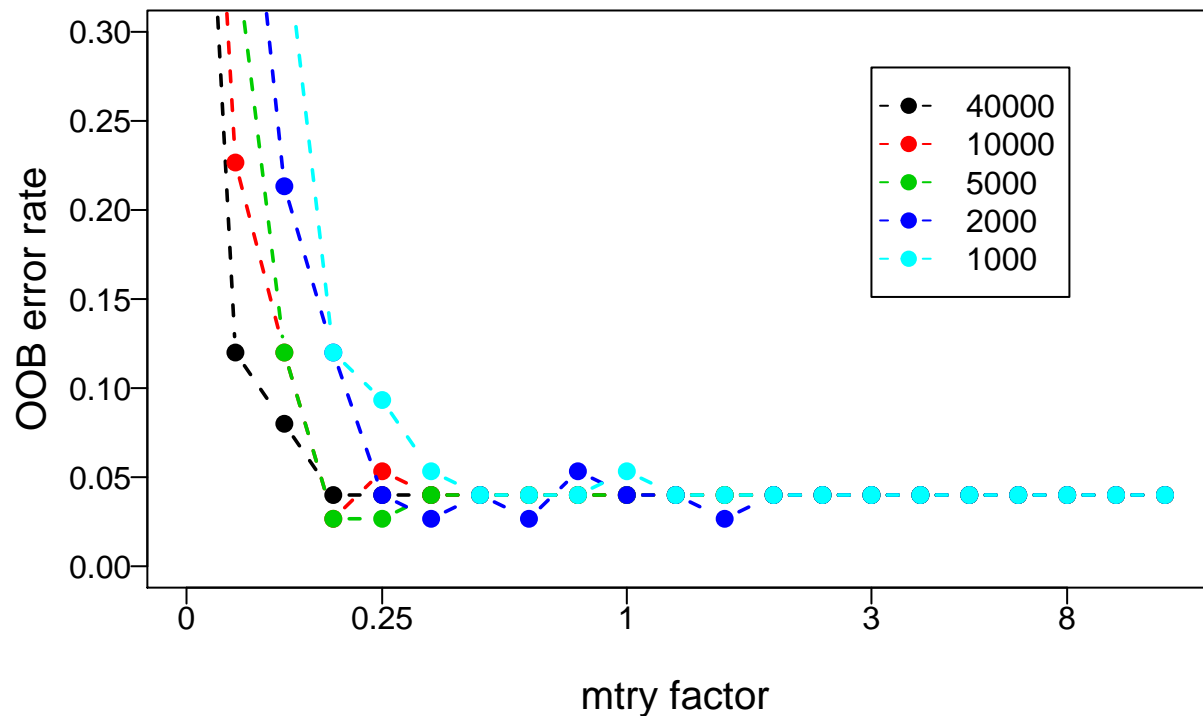

3 classes; 1 dimensions; 20 genes/dimen.; nodesize = 5

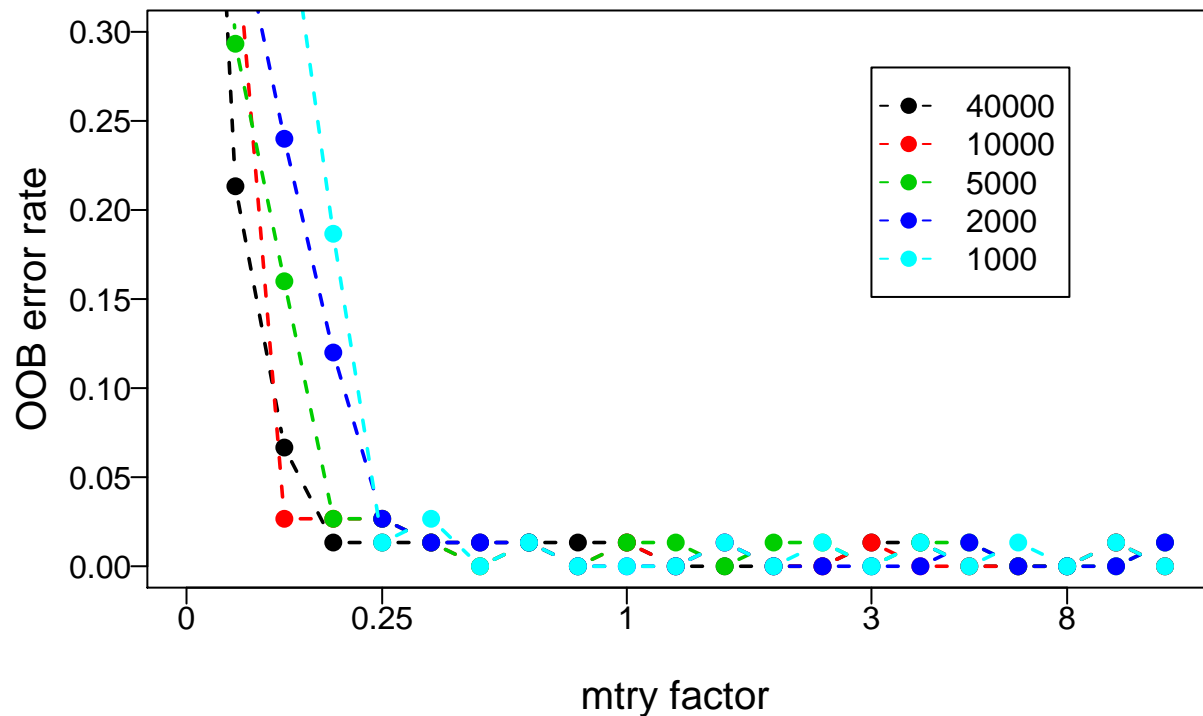

3 classes; 1 dimensions; 100 genes/dimen.; nodesize = 5

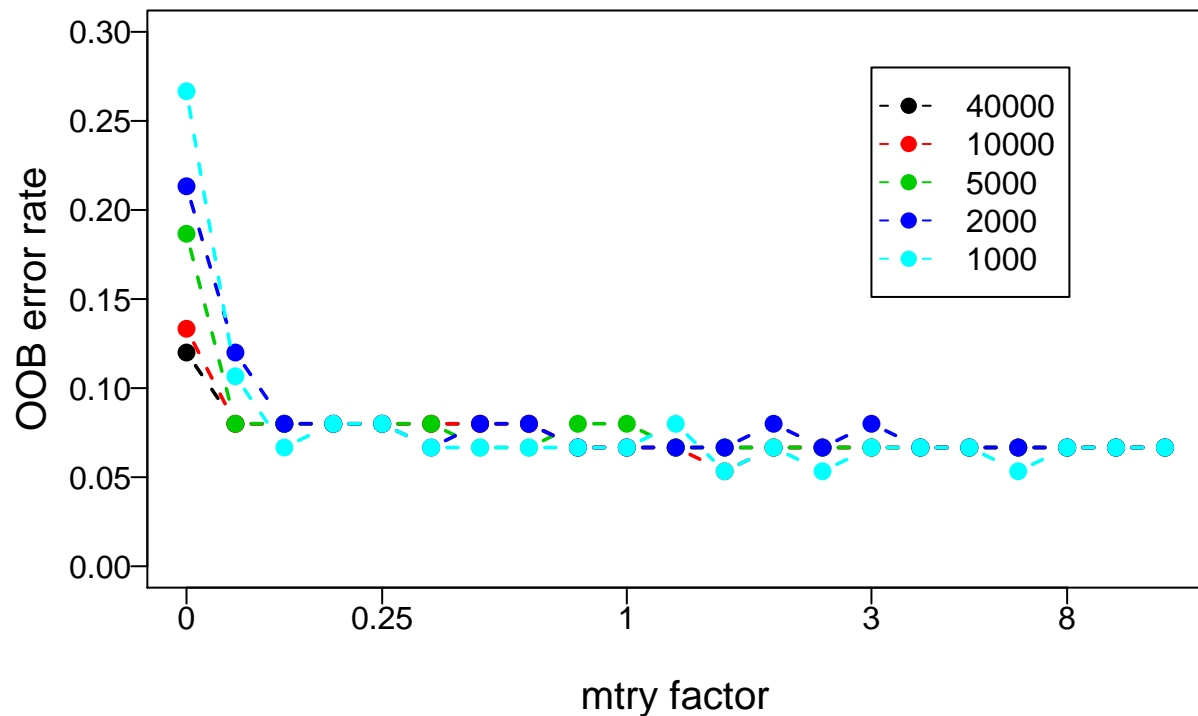

3 classes; 1 dimensions; 100 genes/dimen.; nodesize = 5

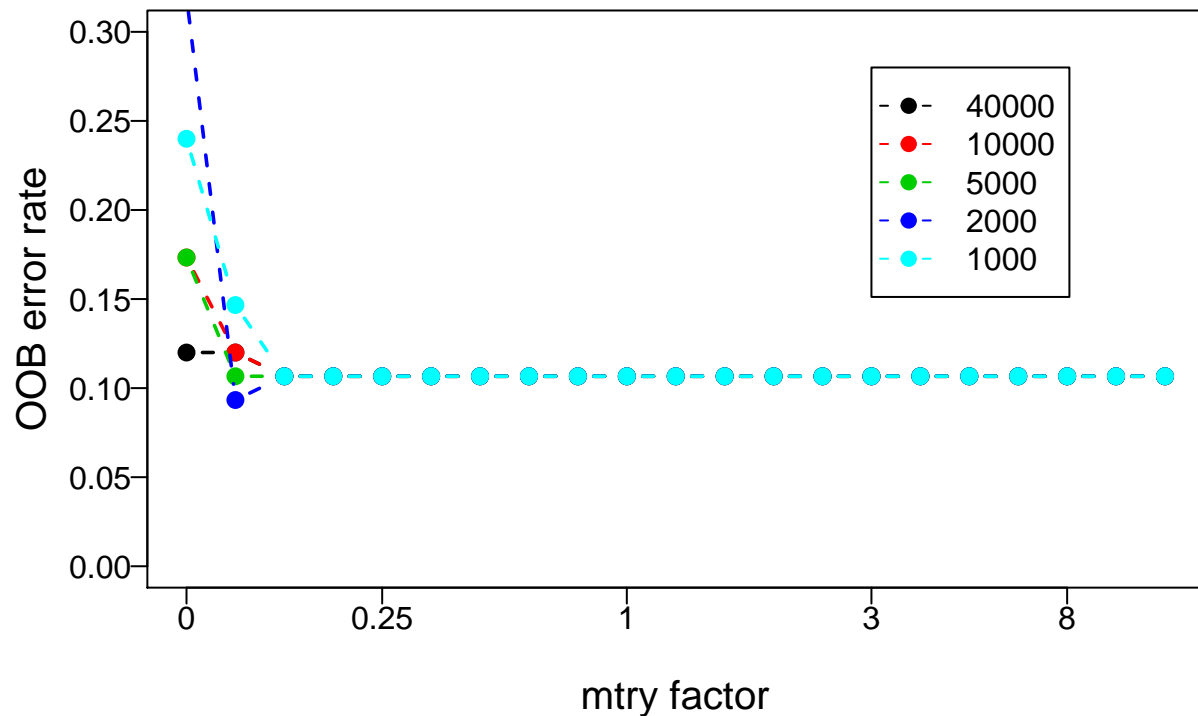

3 classes; 1 dimensions; 100 genes/dimen.; nodesize = 5

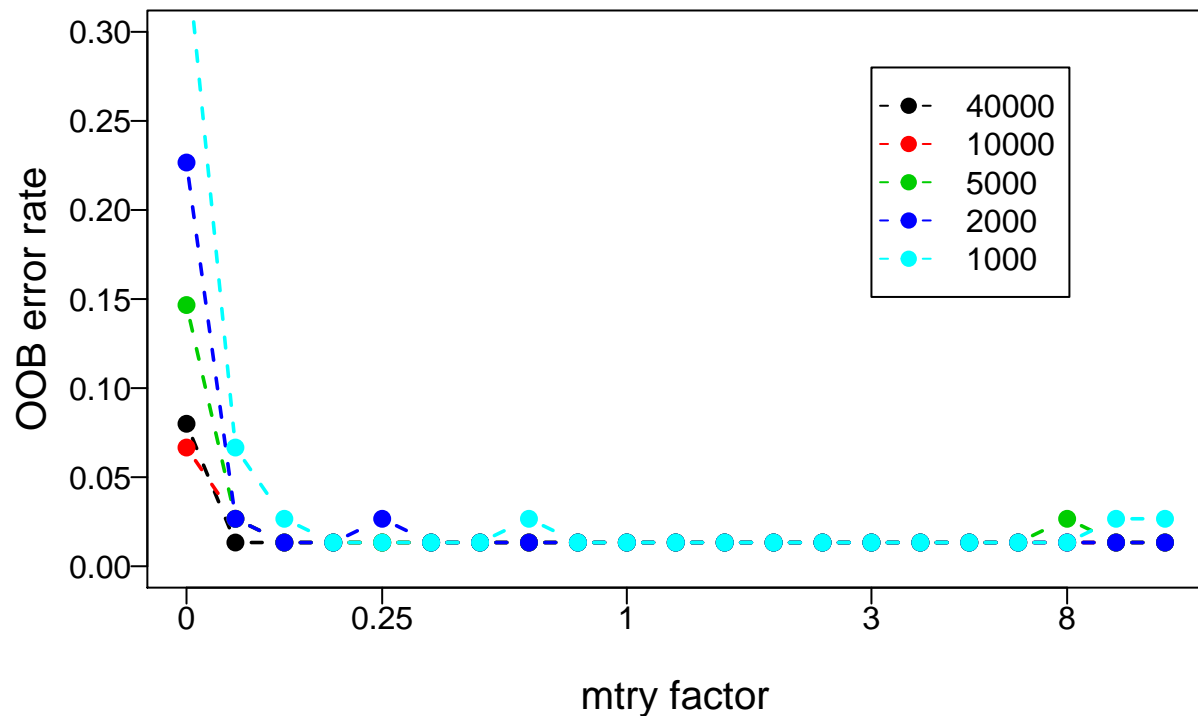

3 classes; 1 dimensions; 100 genes/dimen.; nodesize = 5

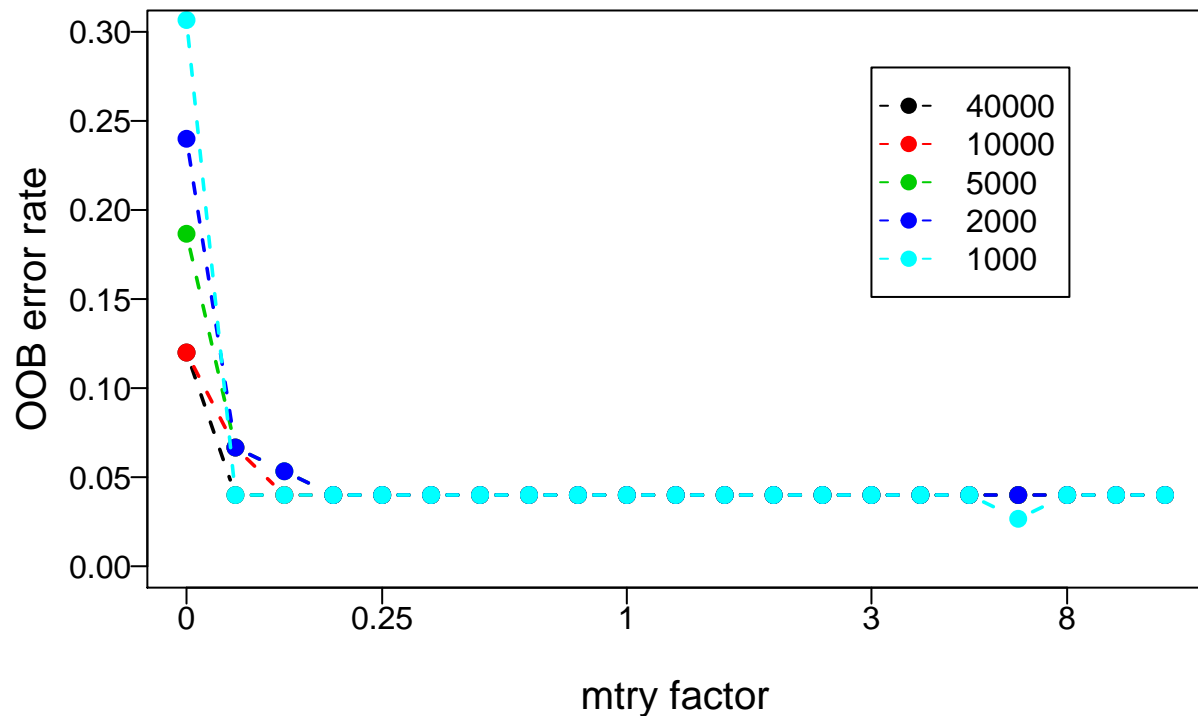



3 classes; 2 dimensions; 5 genes/dimen.; nodesize = 5

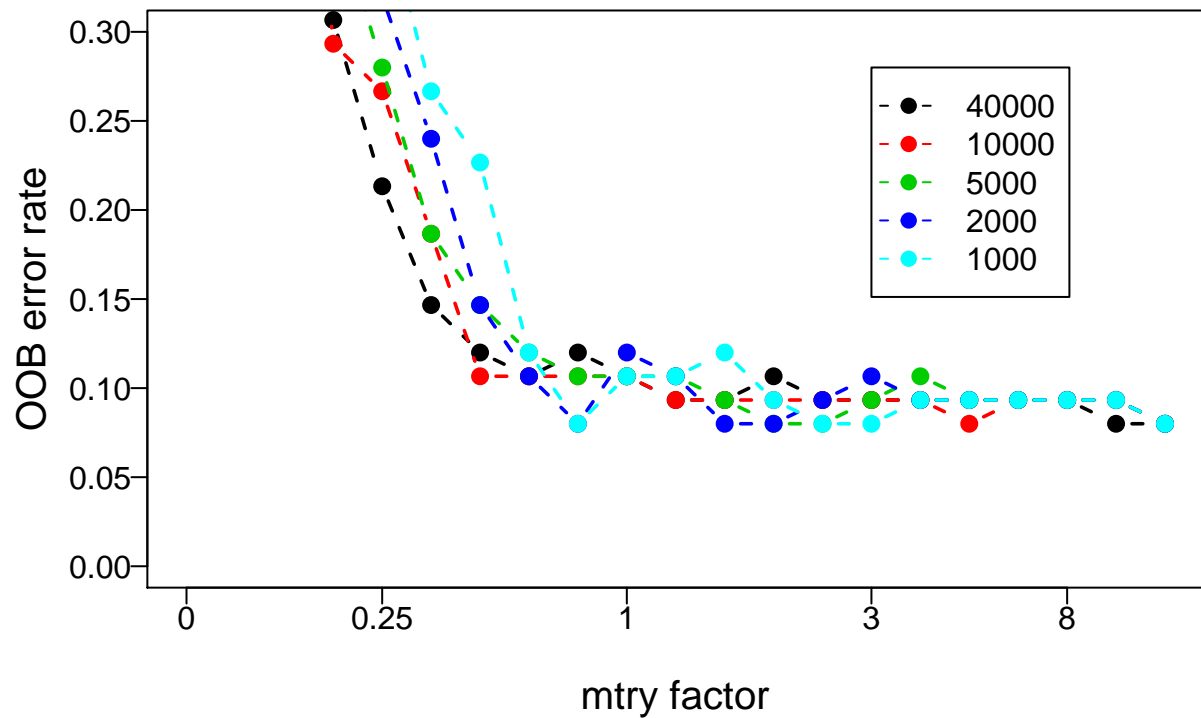

3 classes; 2 dimensions; 5 genes/dimen.; nodesize = 5

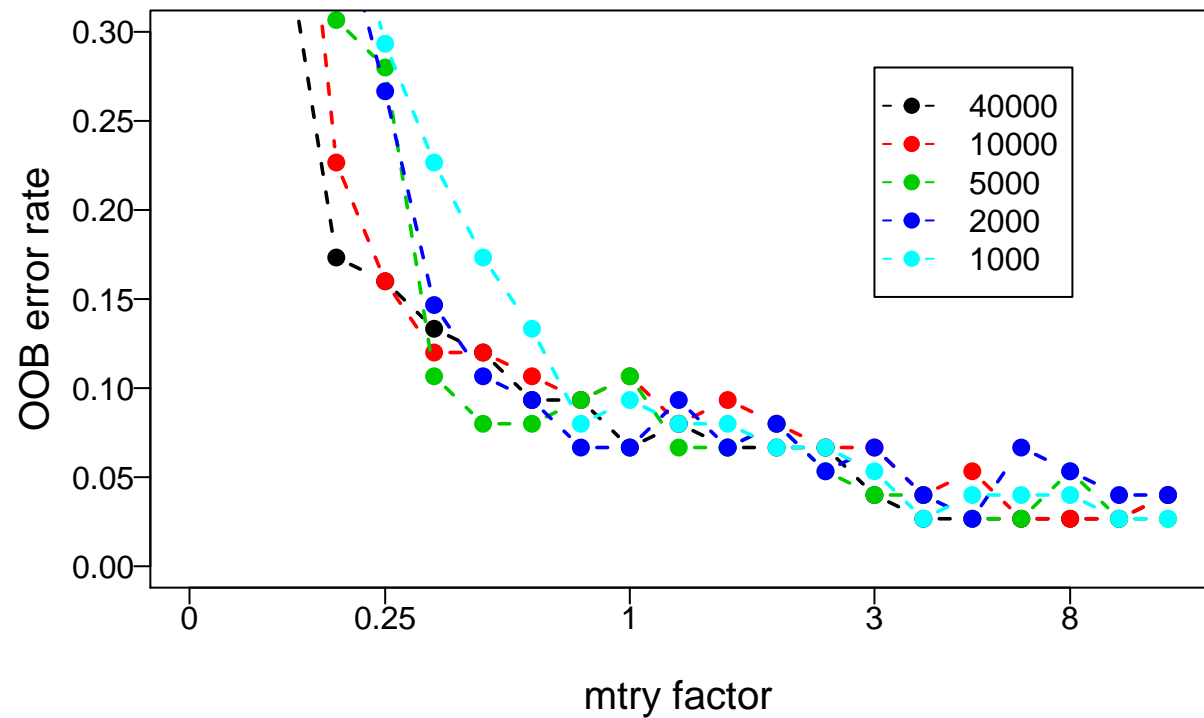

3 classes; 2 dimensions; 5 genes/dimen.; nodesize = 5

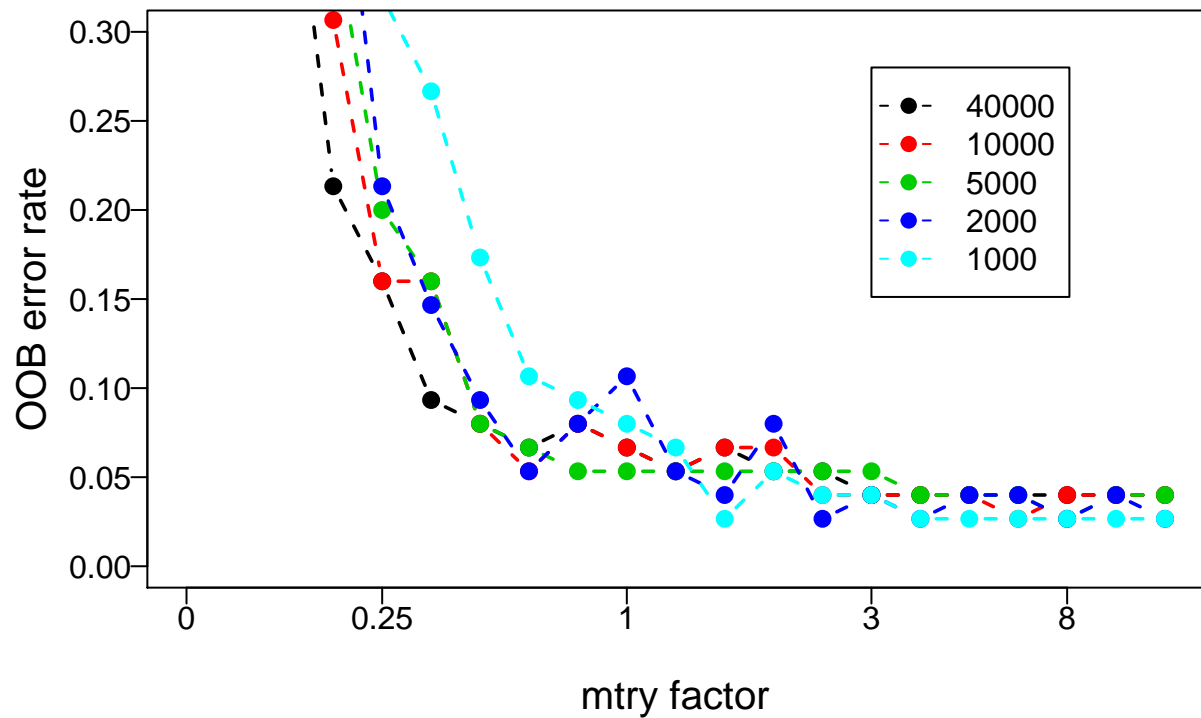

3 classes; 2 dimensions; 5 genes/dimen.; nodesize = 5

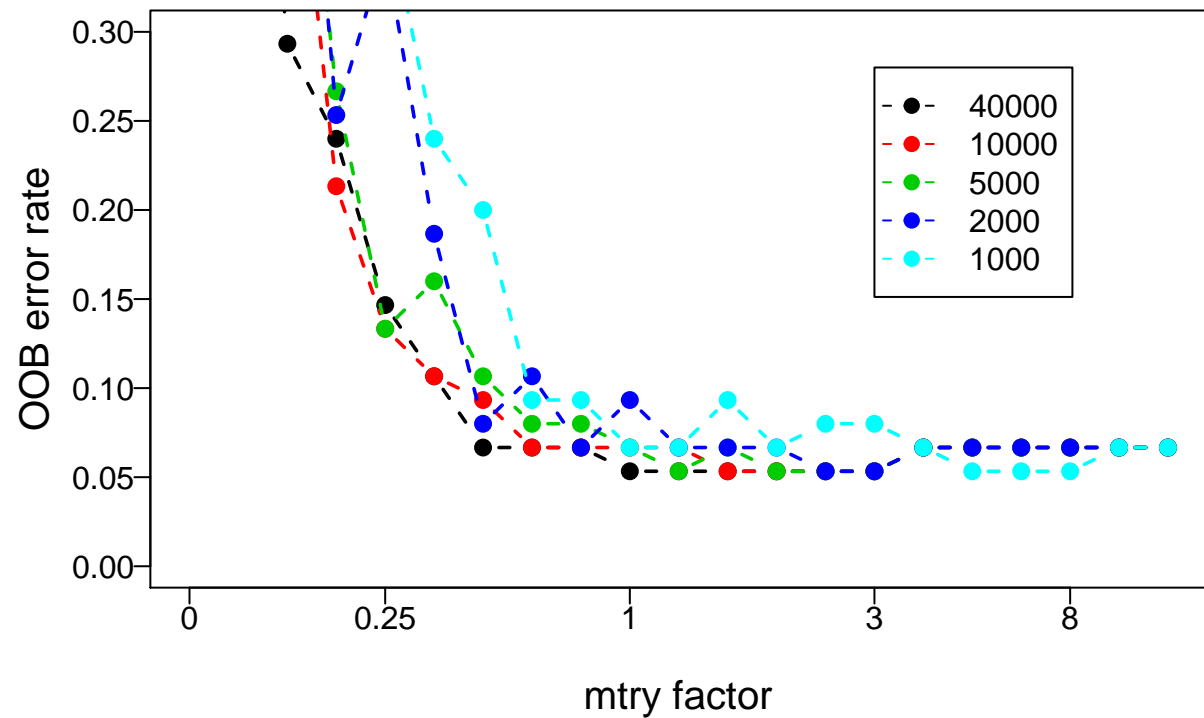

3 classes; 2 dimensions; 20 genes/dimen.; nodesize = 5

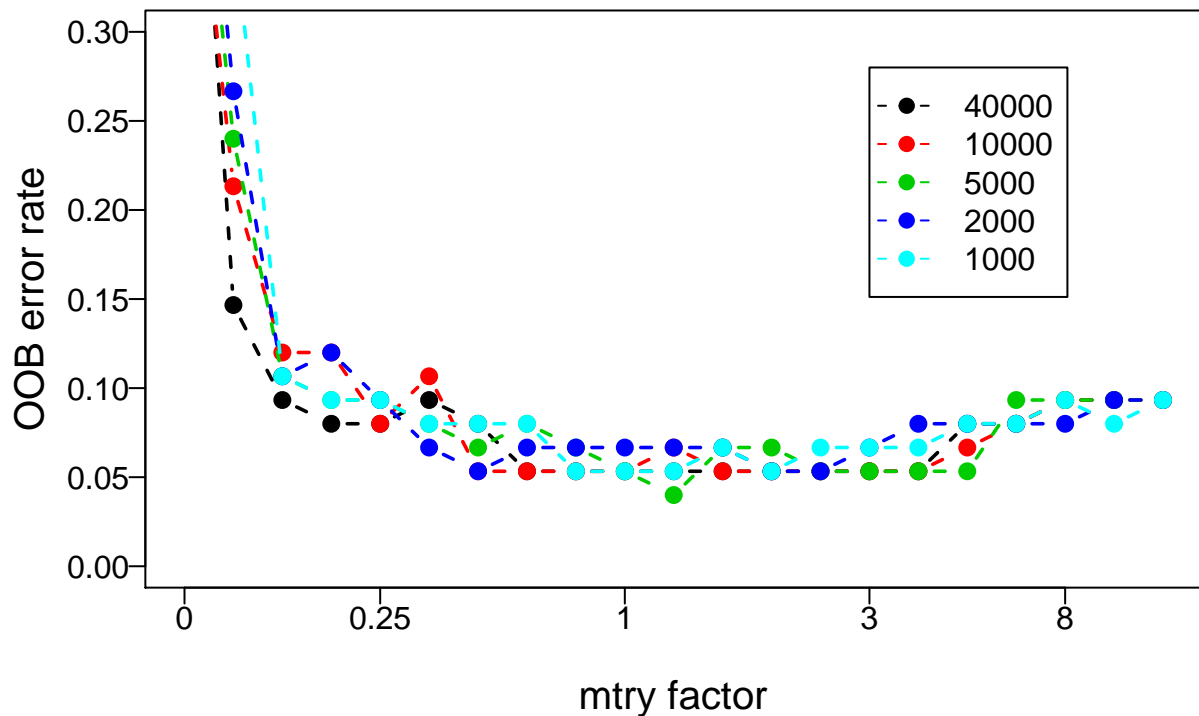

3 classes; 2 dimensions; 20 genes/dimen.; nodesize = 5

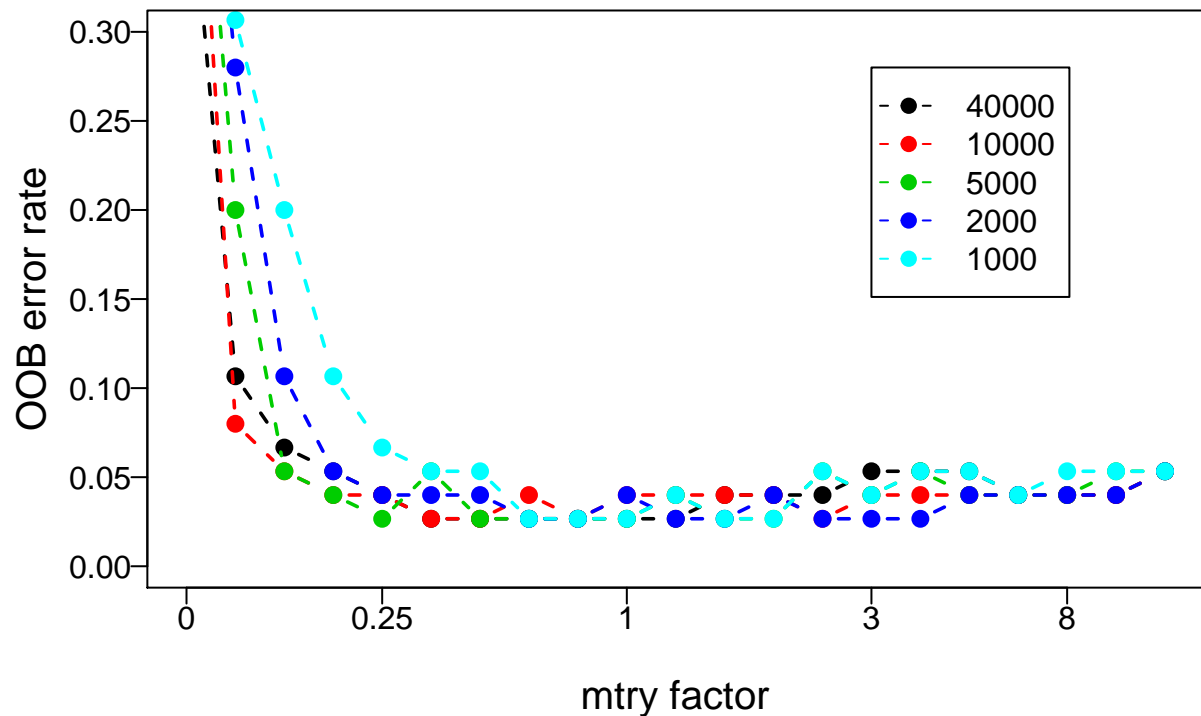

3 classes; 2 dimensions; 20 genes/dimen.; nodesize = 5

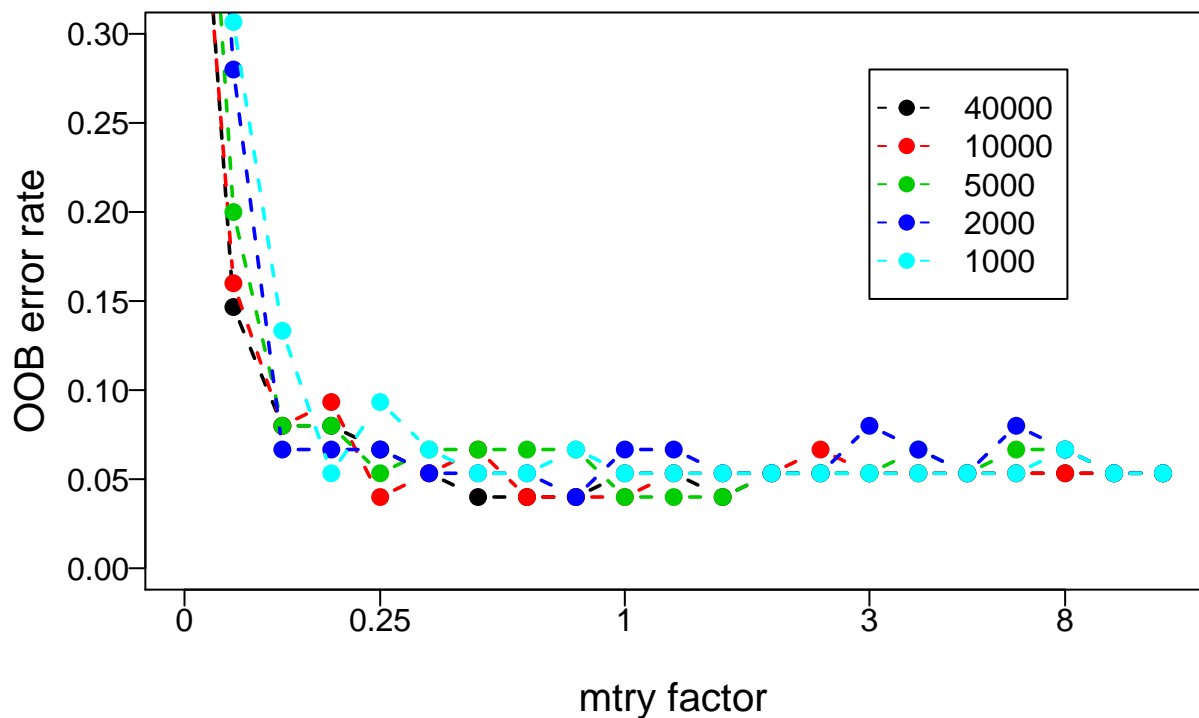

3 classes; 2 dimensions; 20 genes/dimen.; nodesize = 5

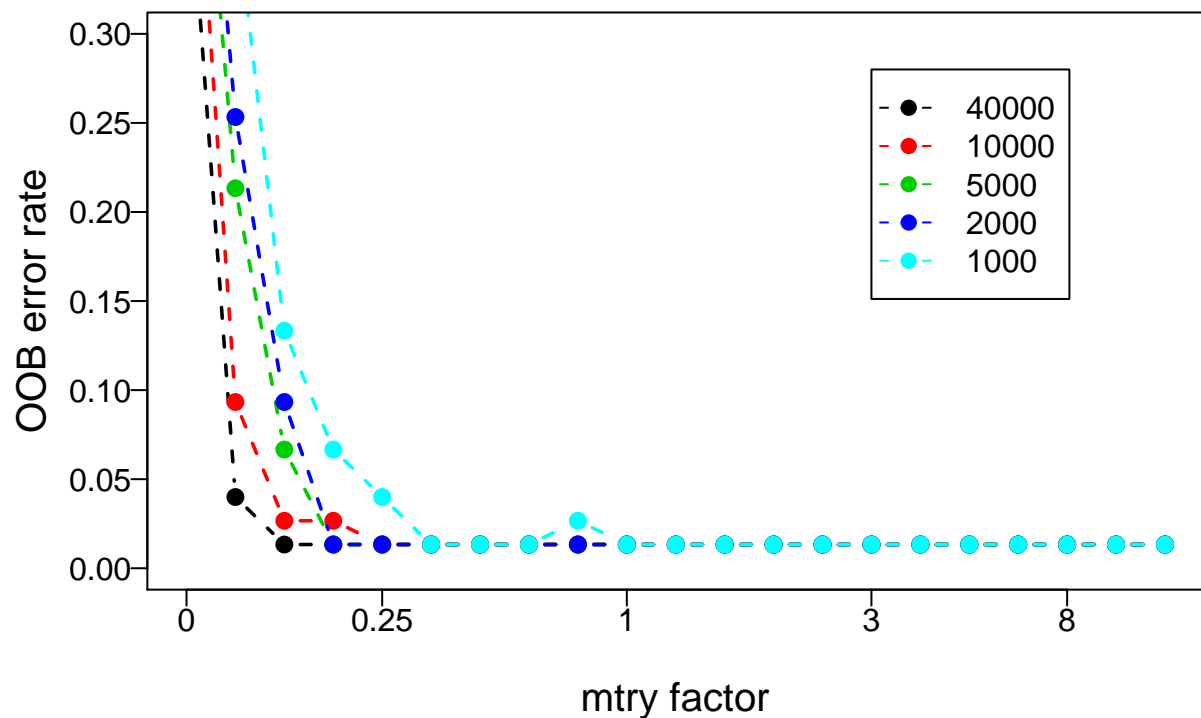

3 classes; 2 dimensions; 100 genes/dimen.; nodesize = 5

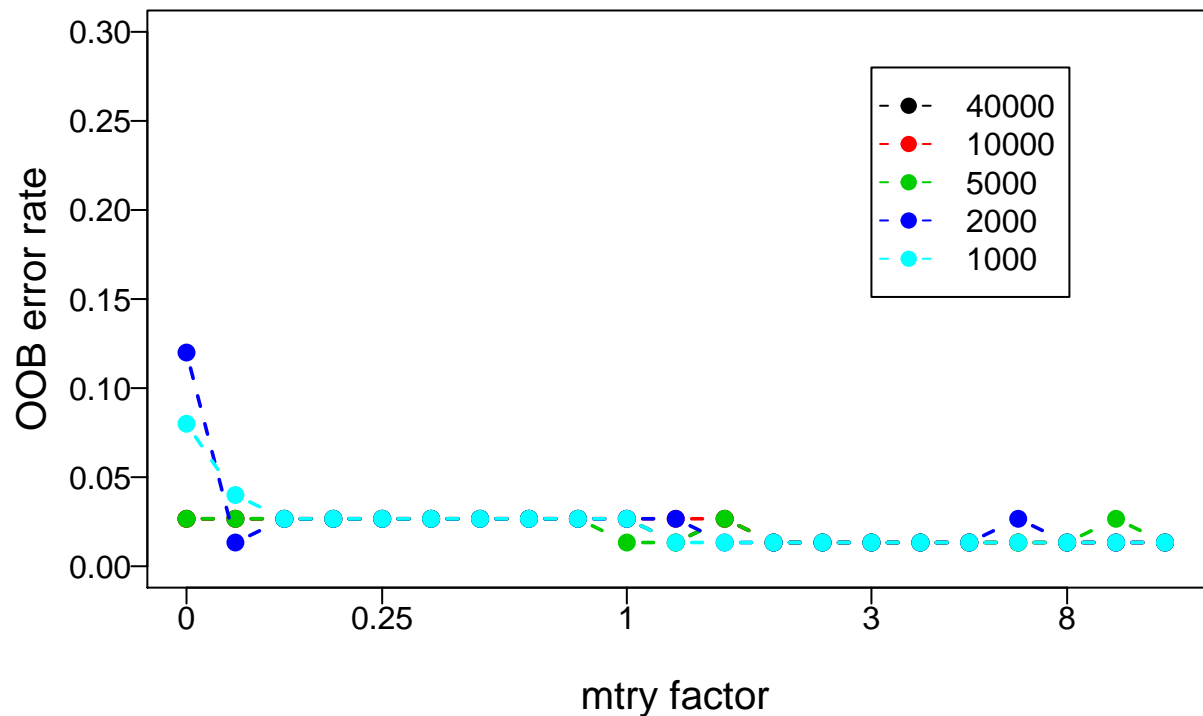

3 classes; 2 dimensions; 100 genes/dimen.; nodesize = 5

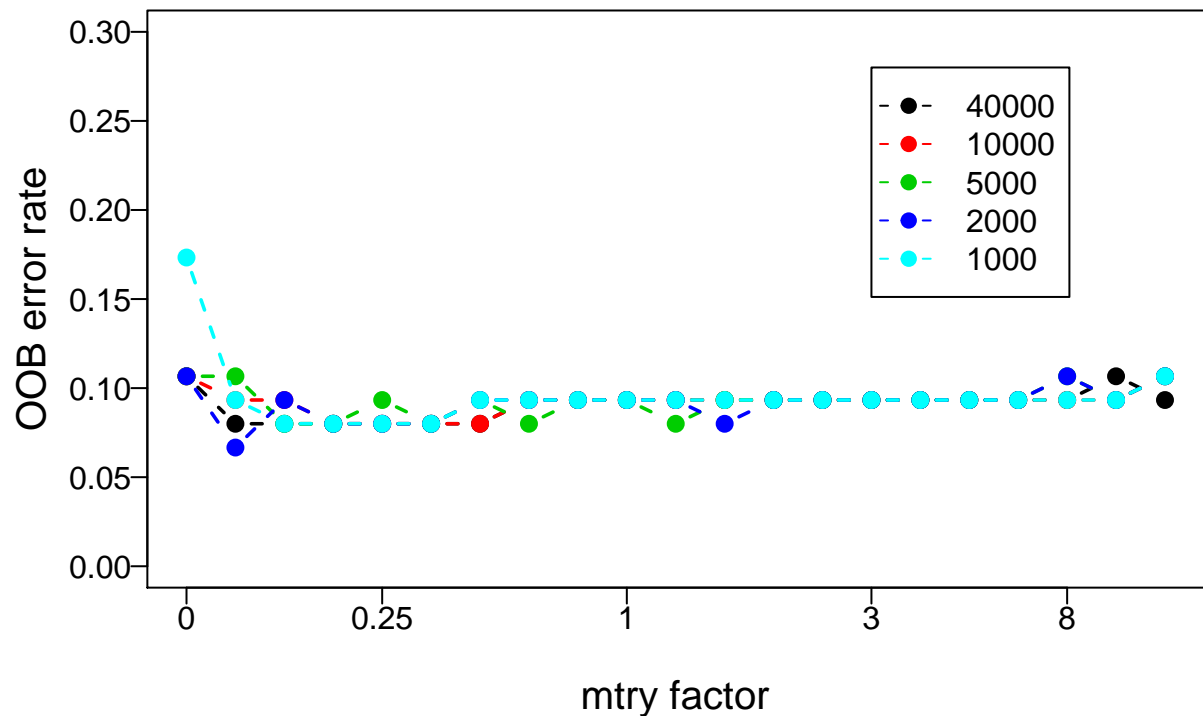

3 classes; 2 dimensions; 100 genes/dimen.; nodesize = 5

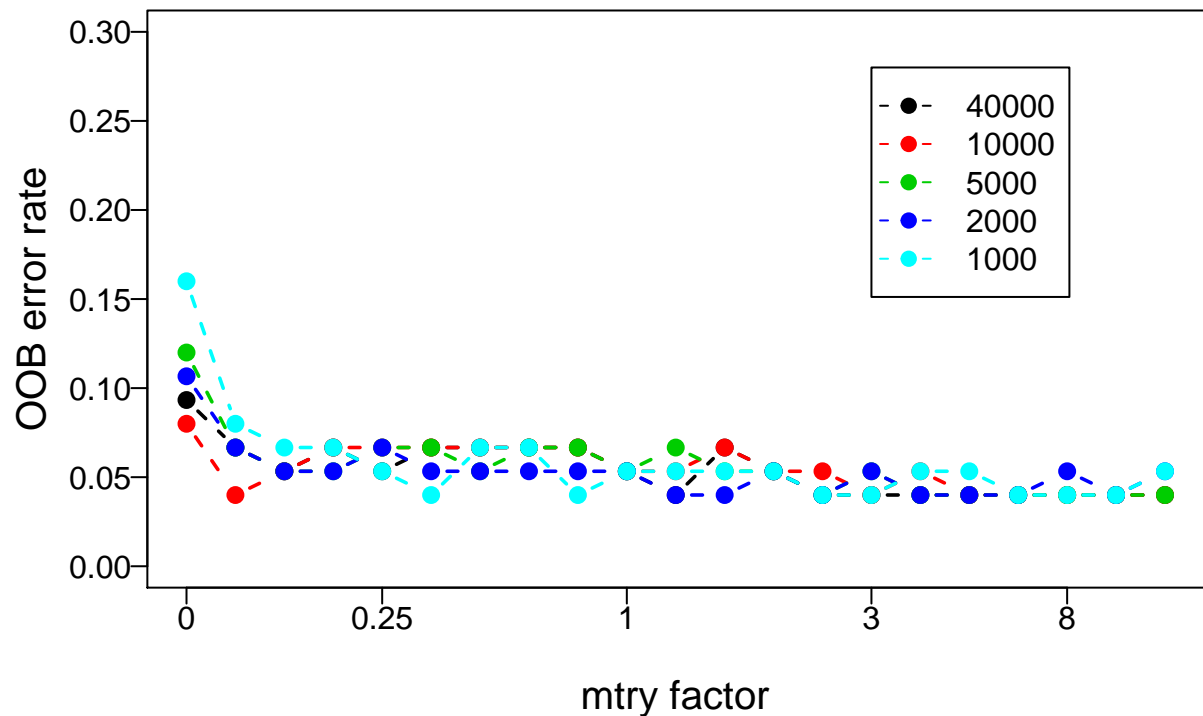

3 classes; 2 dimensions; 100 genes/dimen.; nodesize = 5

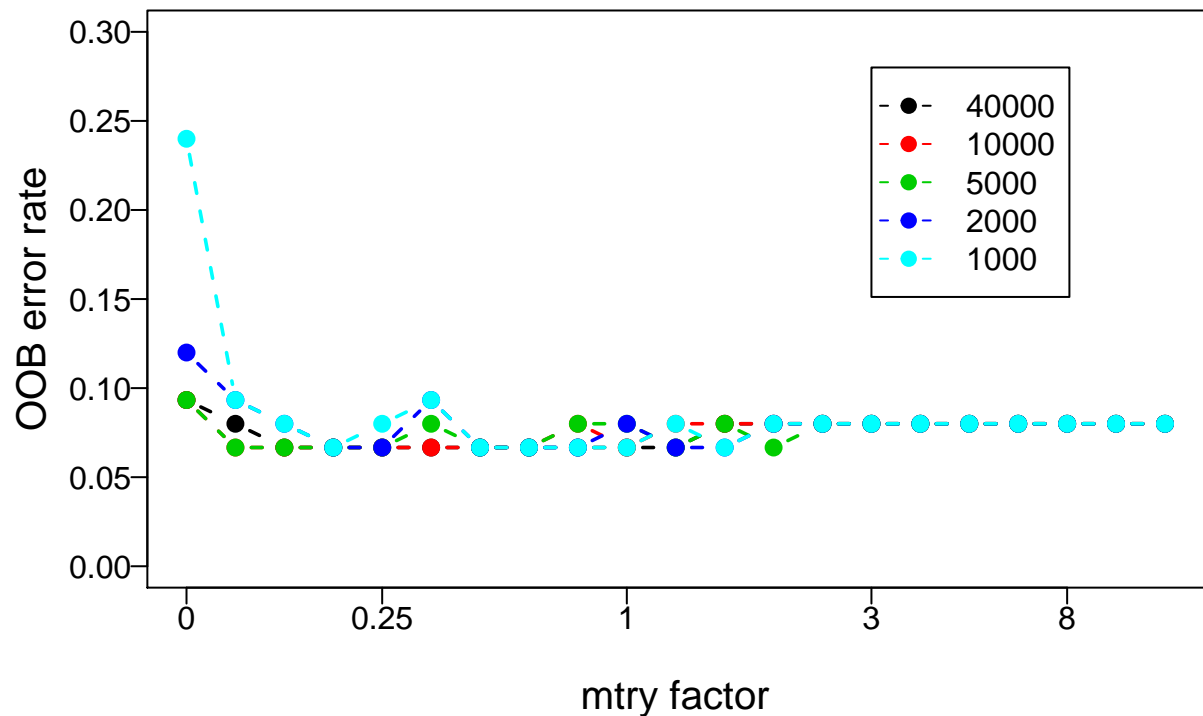

3 classes; 3 dimensions; 5 genes/dimen.; nodelist = 5

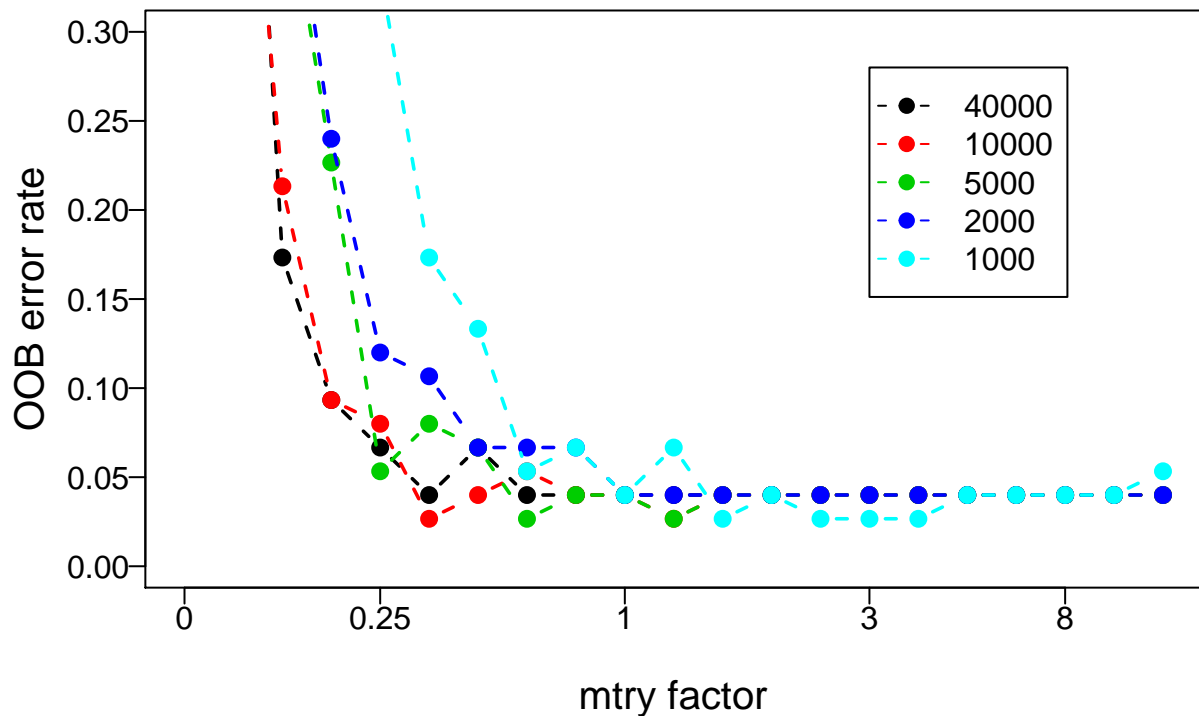

3 classes; 3 dimensions; 5 genes/dimen.; nodelist = 5

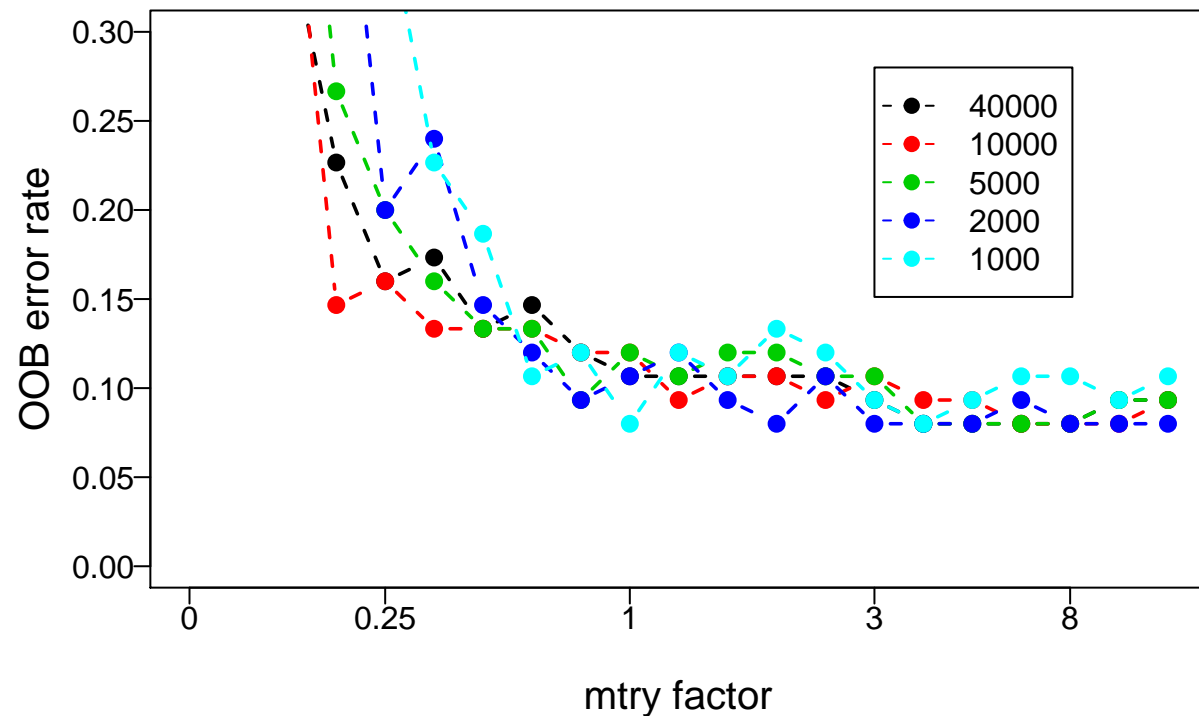

3 classes; 3 dimensions; 5 genes/dimen.; nodelist = 5

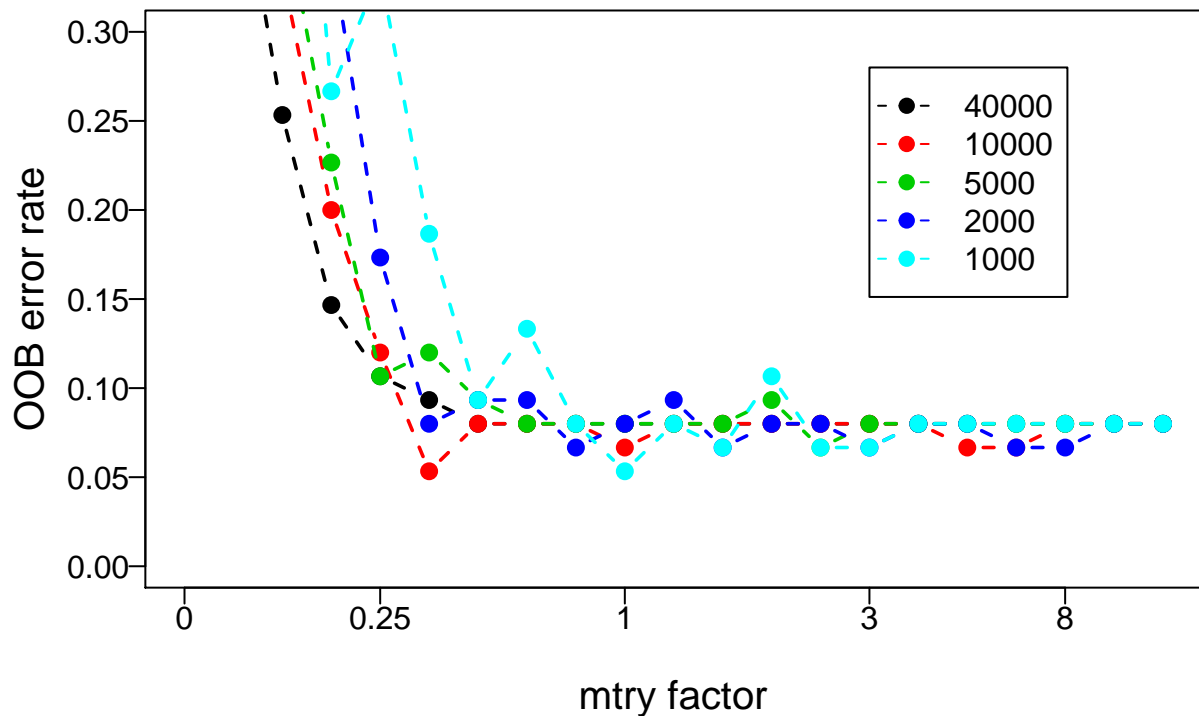

3 classes; 3 dimensions; 5 genes/dimen.; nodelist = 5

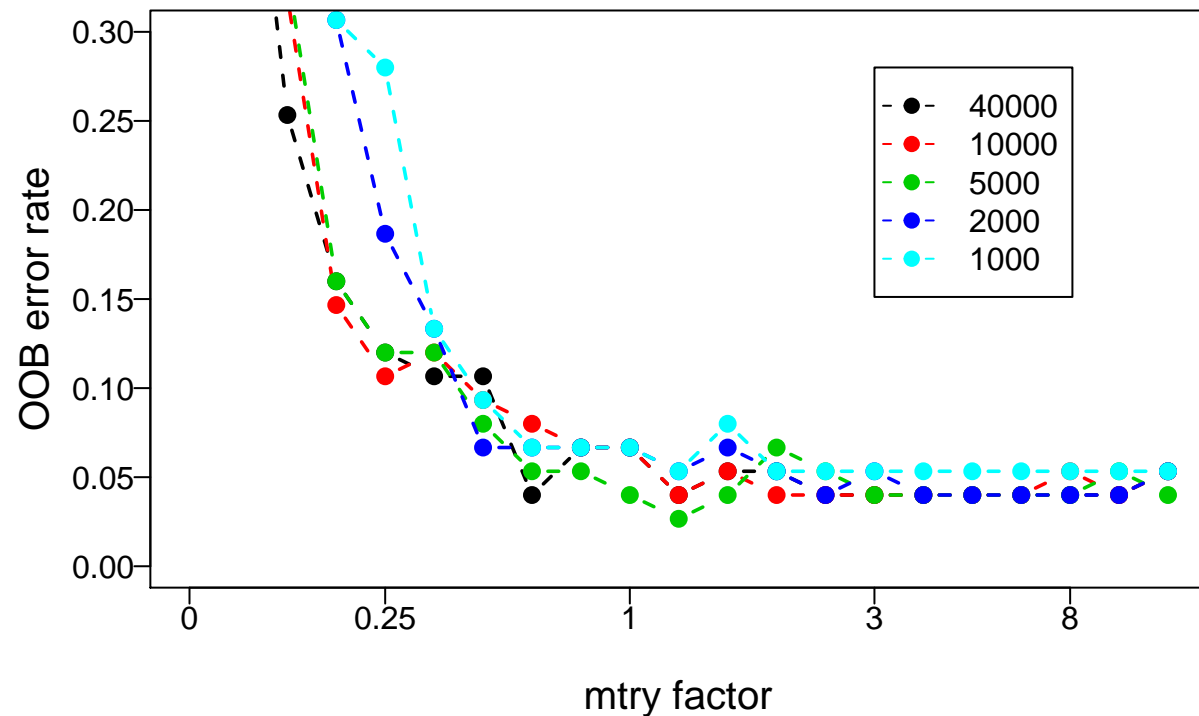

3 classes; 3 dimensions; 20 genes/dimen.; nodesize = 5

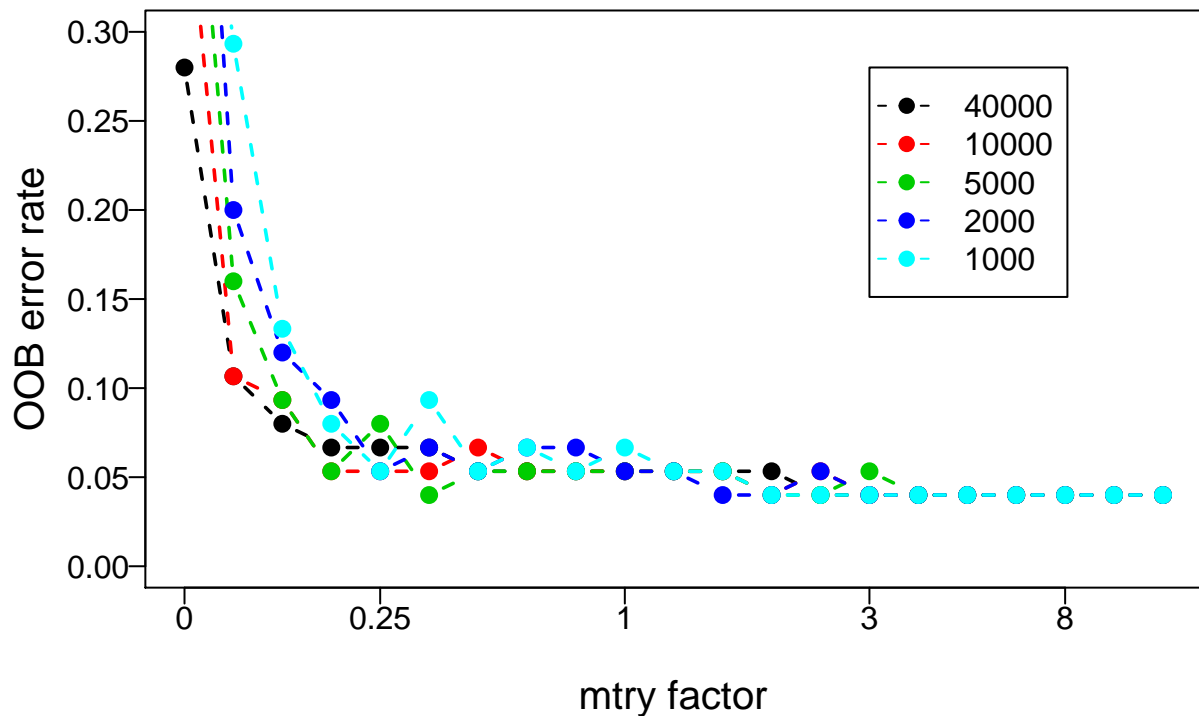

3 classes; 3 dimensions; 20 genes/dimen.; nodesize = 5

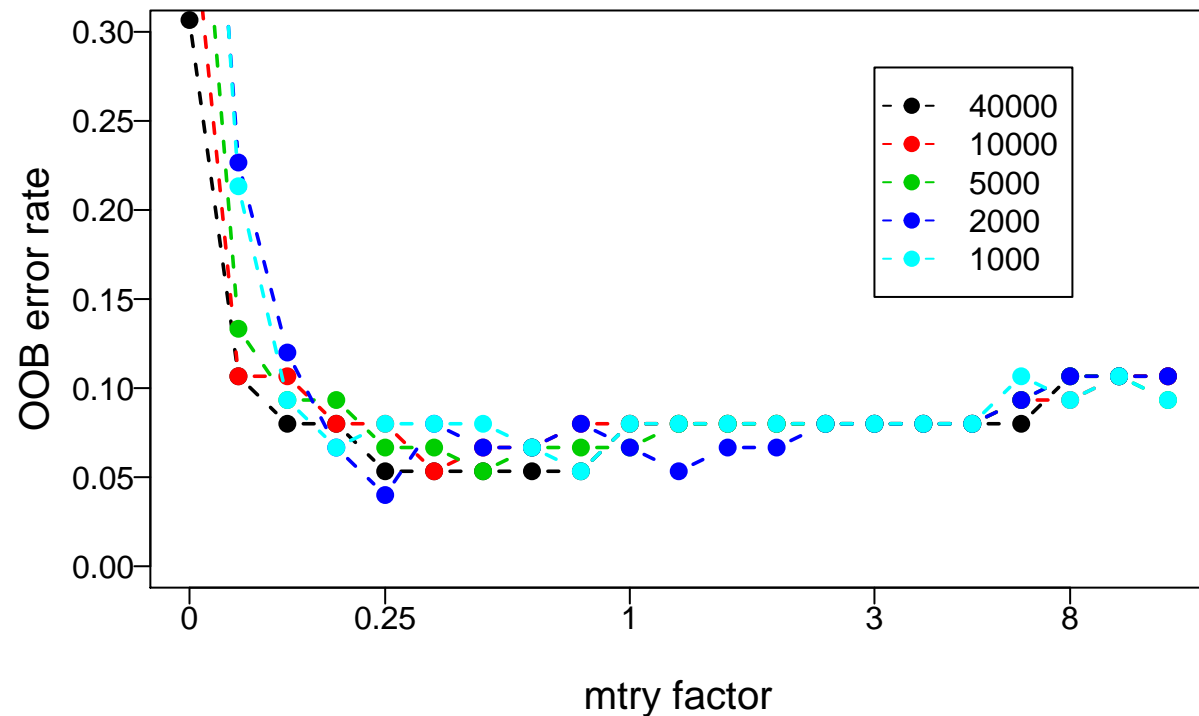

3 classes; 3 dimensions; 20 genes/dimen.; nodesize = 5

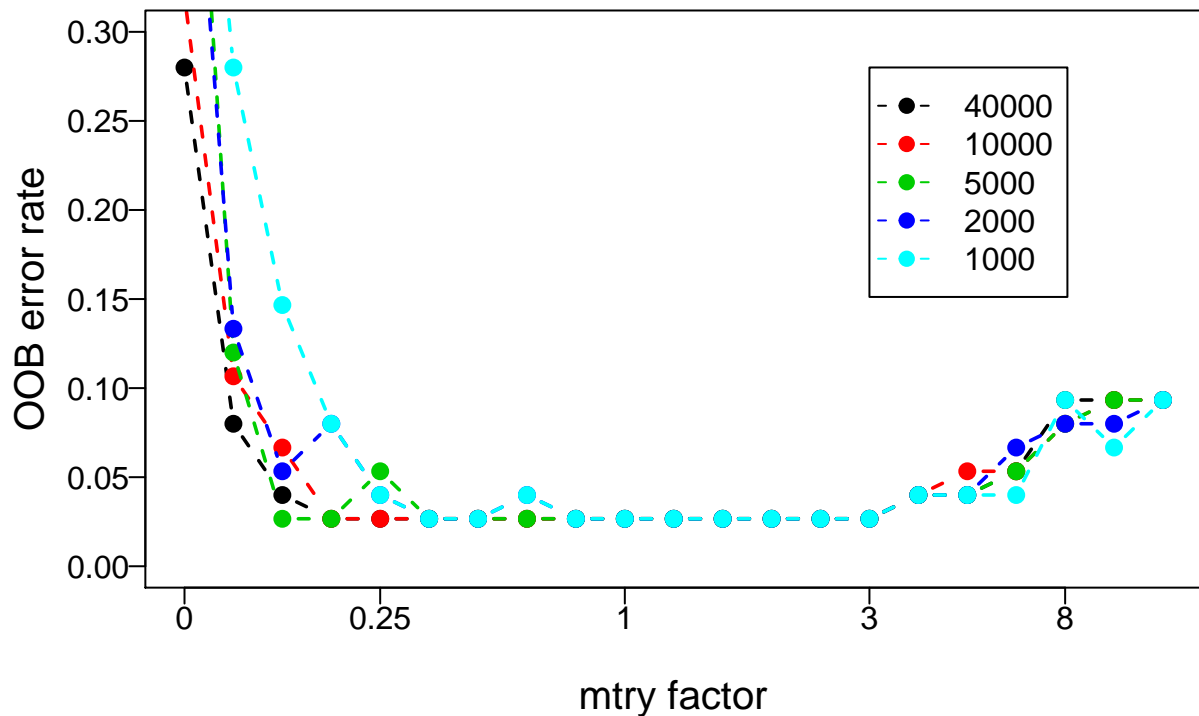

3 classes; 3 dimensions; 20 genes/dimen.; nodesize = 5

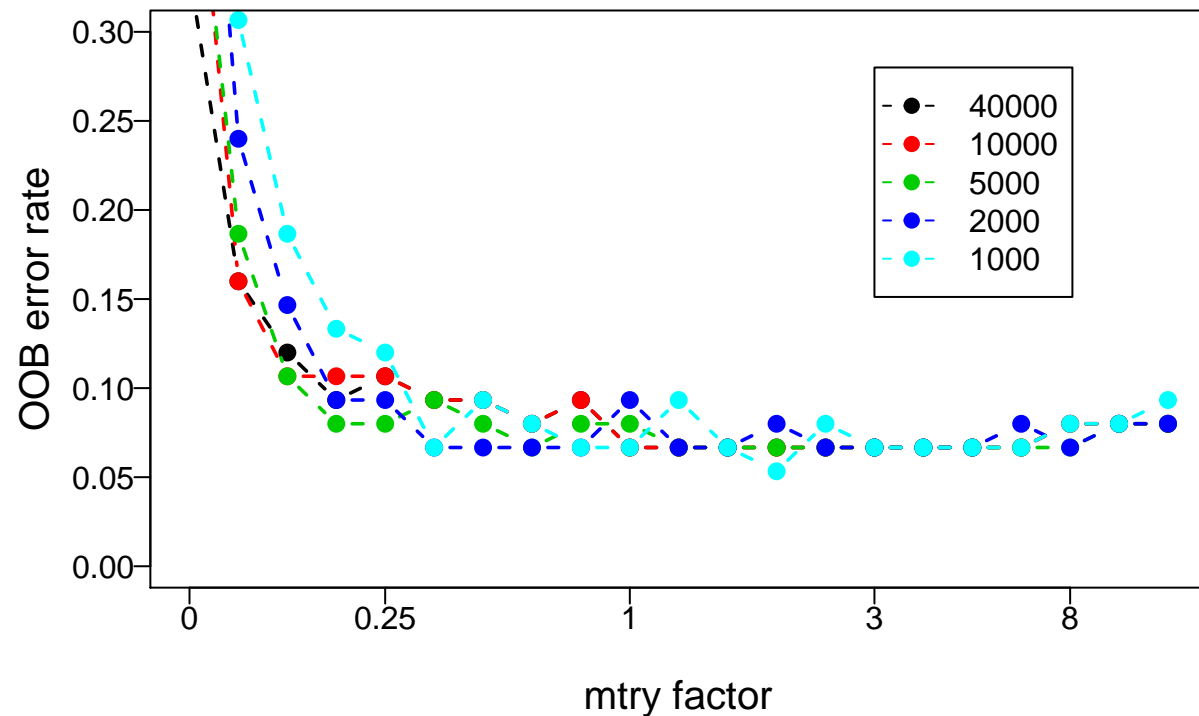

3 classes; 3 dimensions; 100 genes/dimen.; nodesize = 5

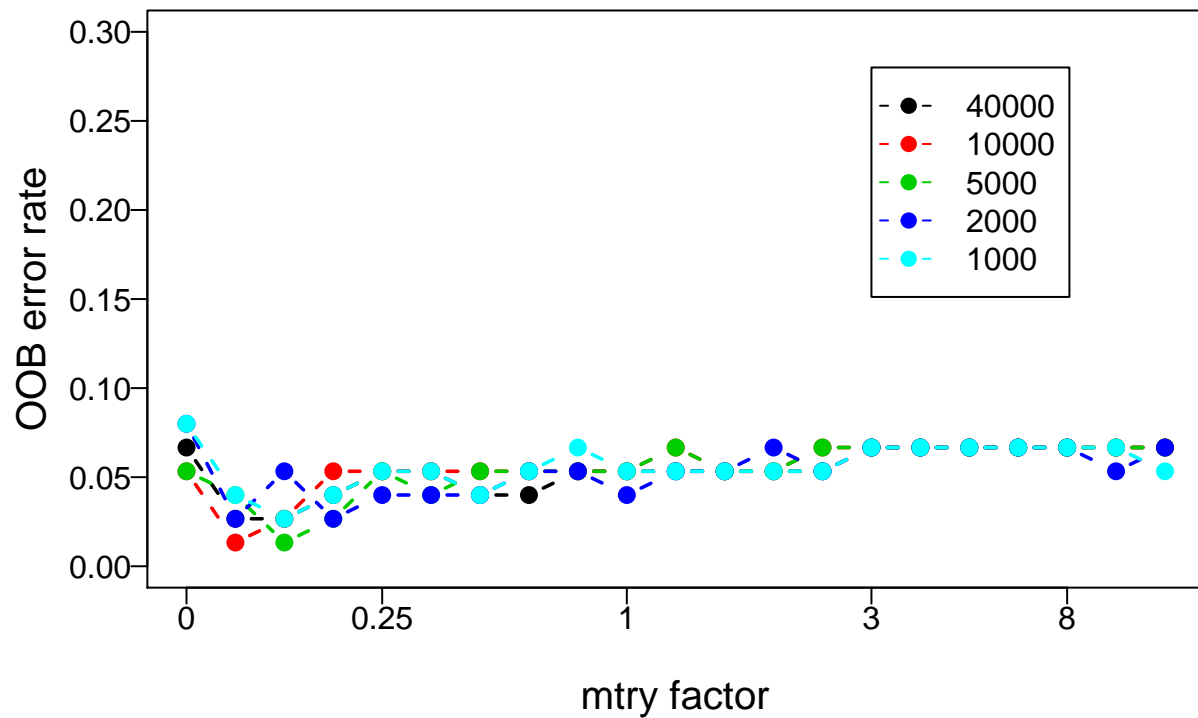

3 classes; 3 dimensions; 100 genes/dimen.; nodesize = 5

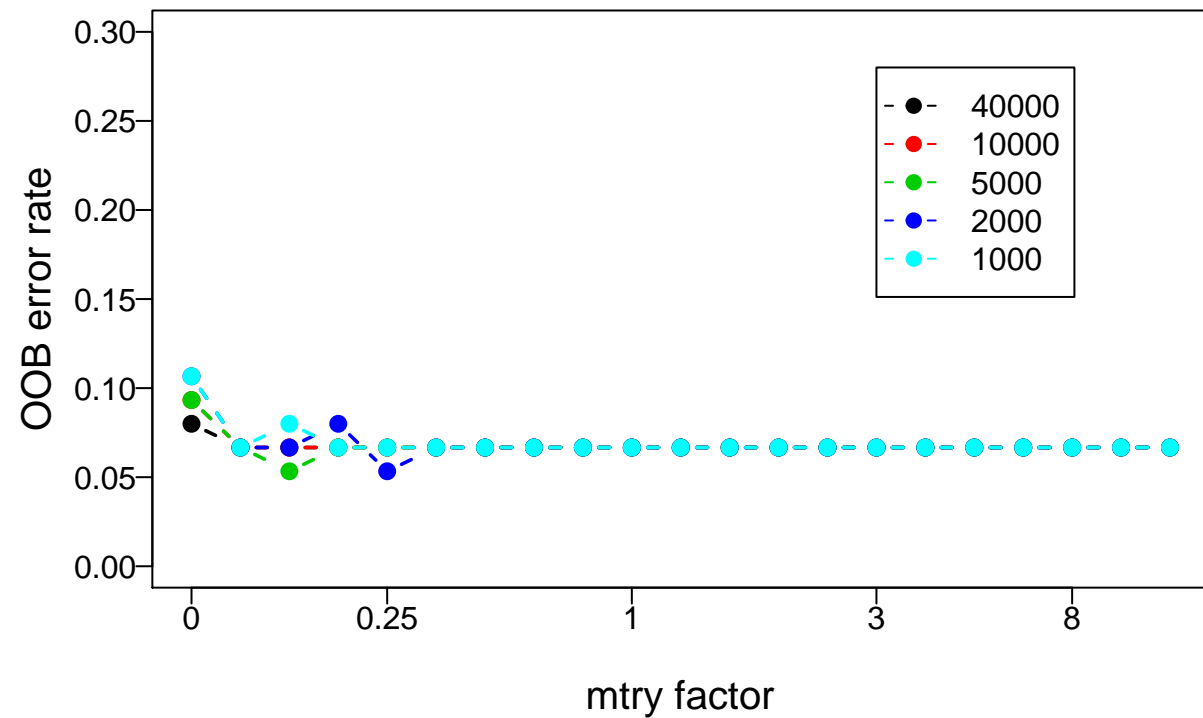

3 classes; 3 dimensions; 100 genes/dimen.; nodesize = 5

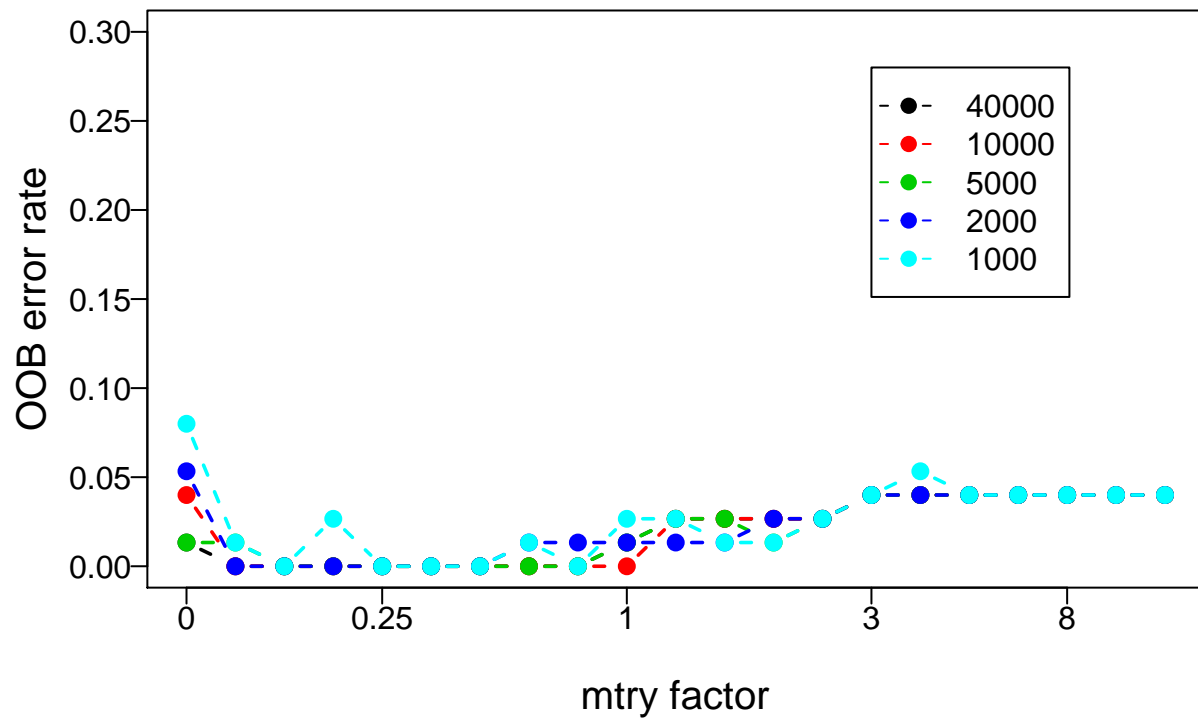

3 classes; 3 dimensions; 100 genes/dimen.; nodesize = 5

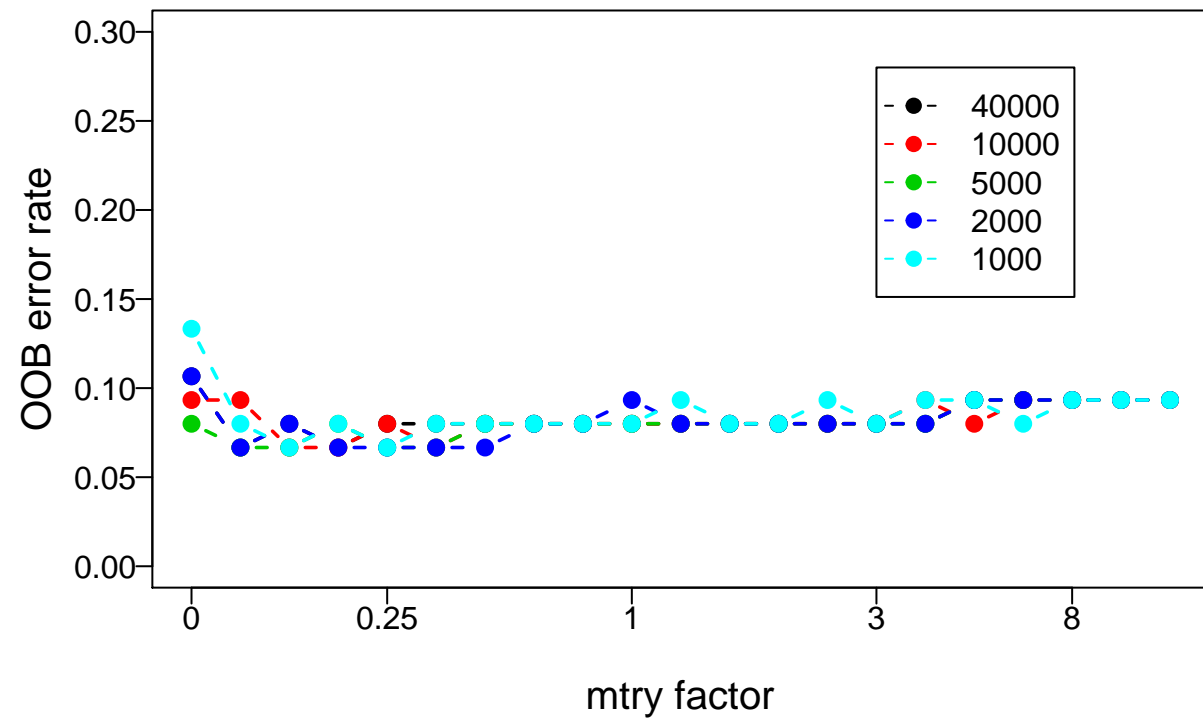

4 classes; 1 dimensions; 5 genes/dimen.; nodesize = 5

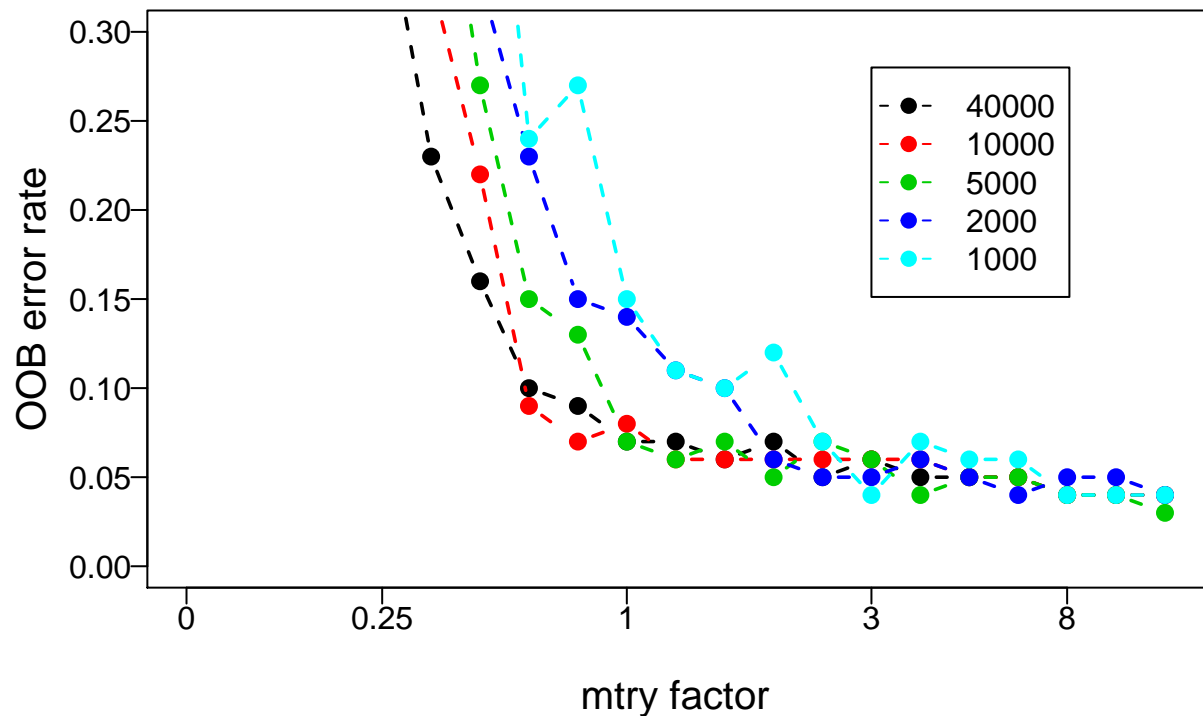

4 classes; 1 dimensions; 5 genes/dimen.; nodesize = 5

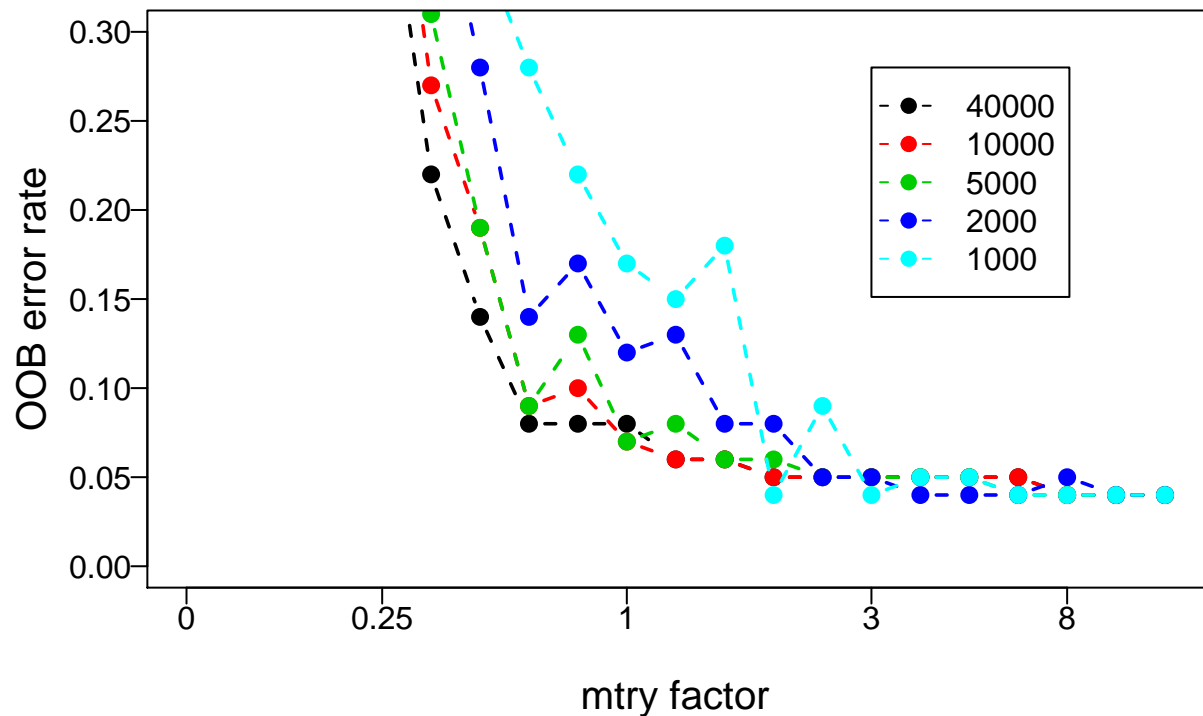

4 classes; 1 dimensions; 5 genes/dimen.; nodesize = 5

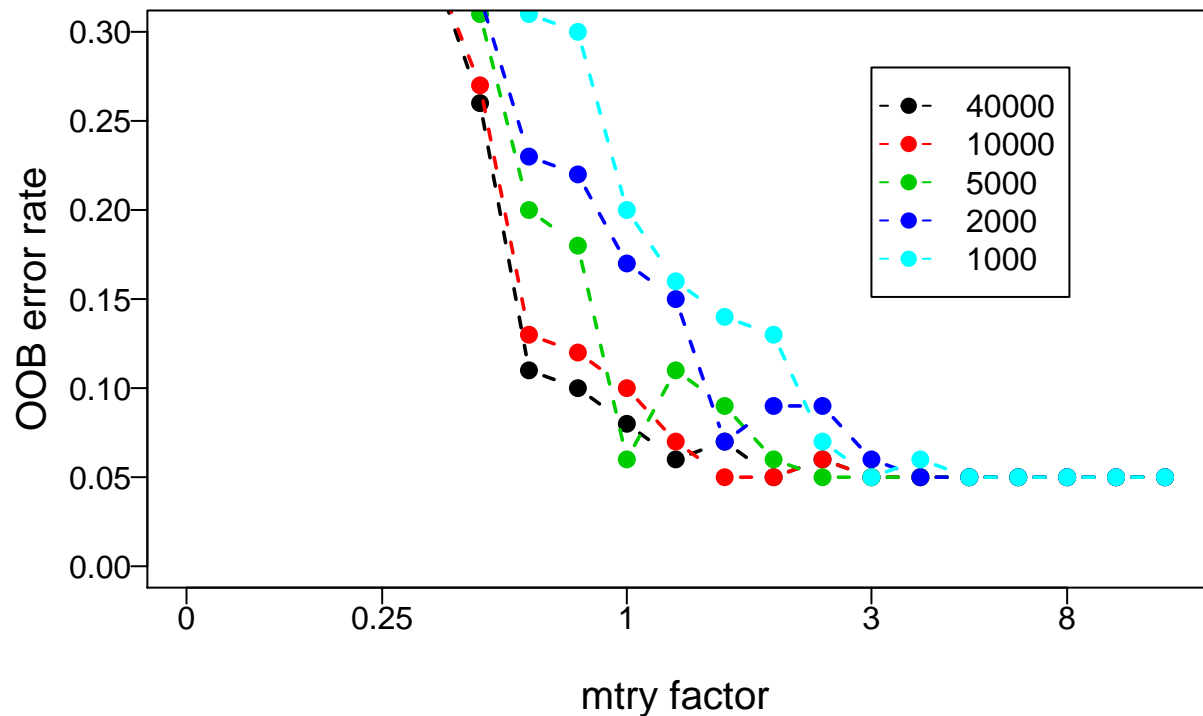

4 classes; 1 dimensions; 5 genes/dimen.; nodesize = 5

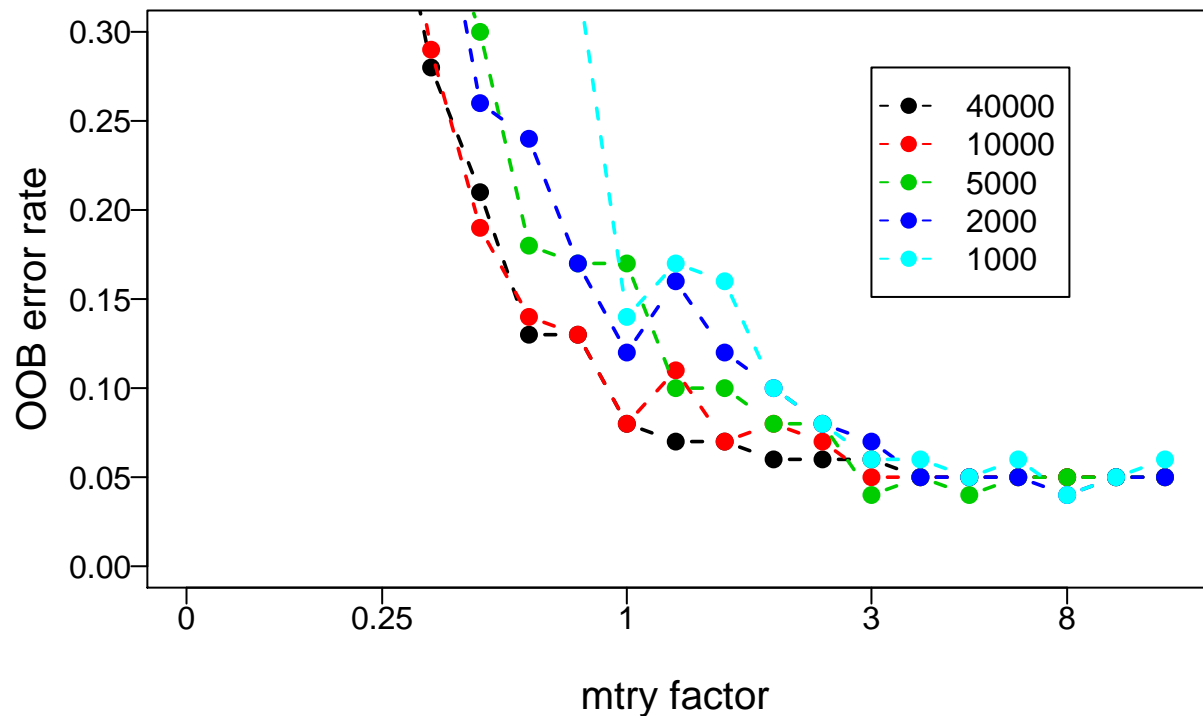

4 classes; 1 dimensions; 20 genes/dimen.; nodesize = 5

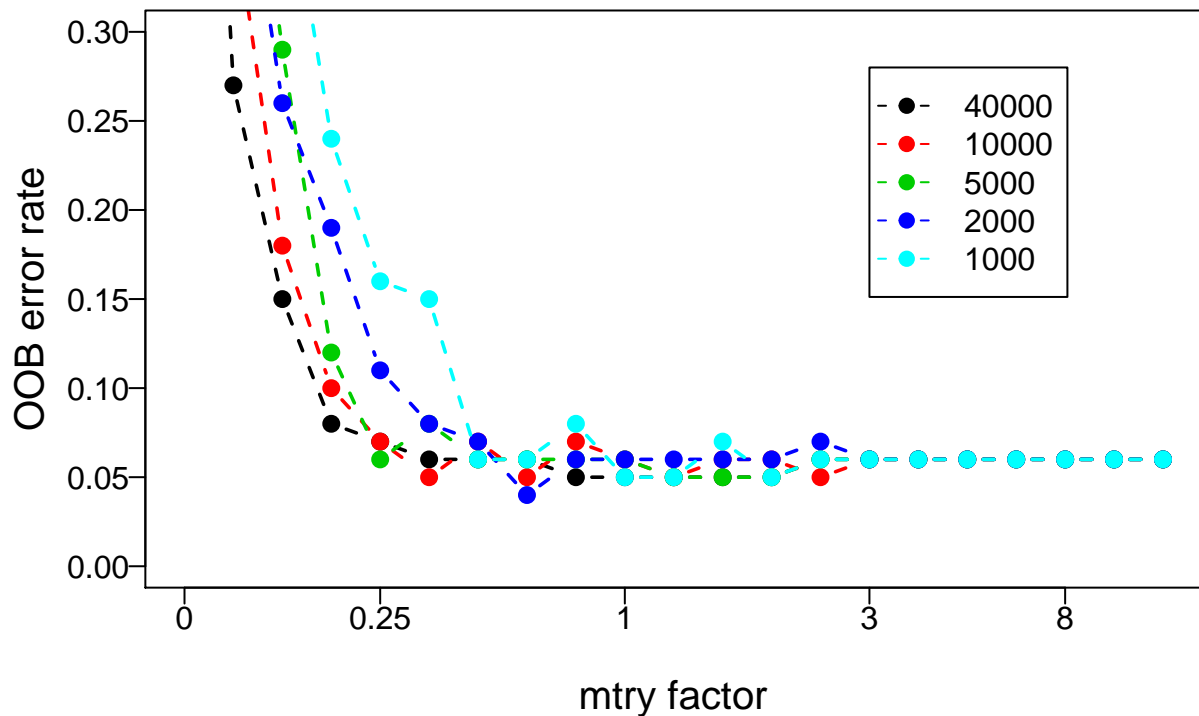

4 classes; 1 dimensions; 20 genes/dimen.; nodesize = 5

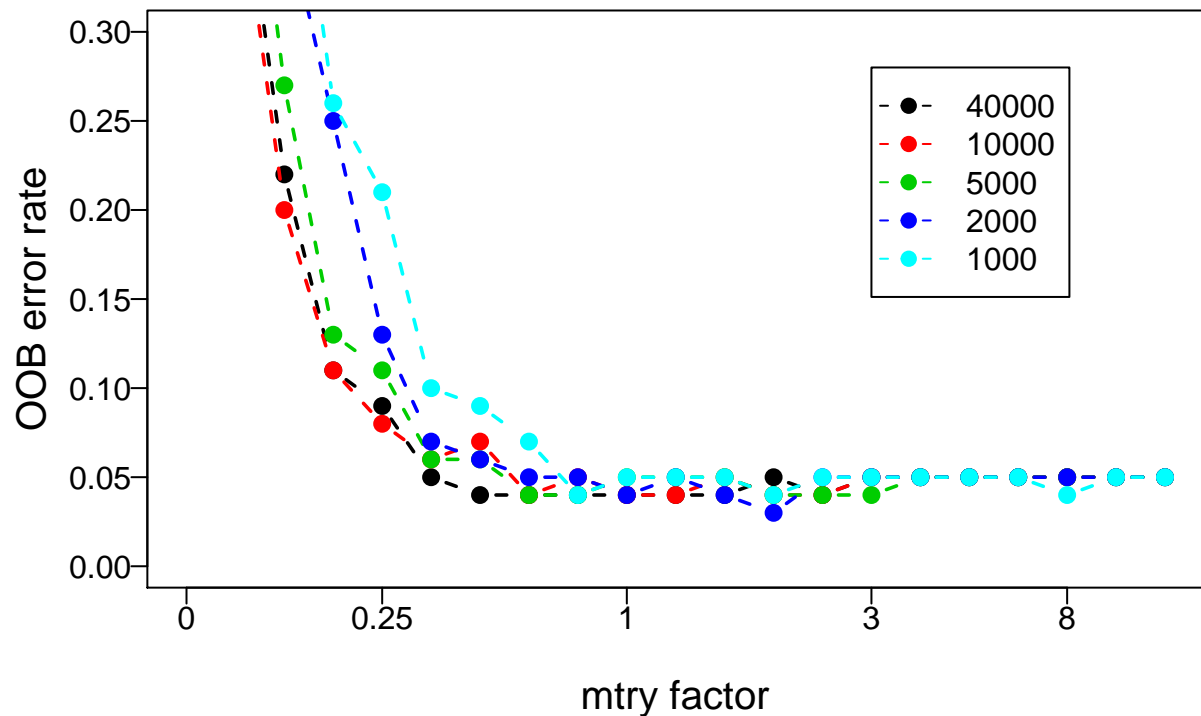

4 classes; 1 dimensions; 20 genes/dimen.; nodesize = 5

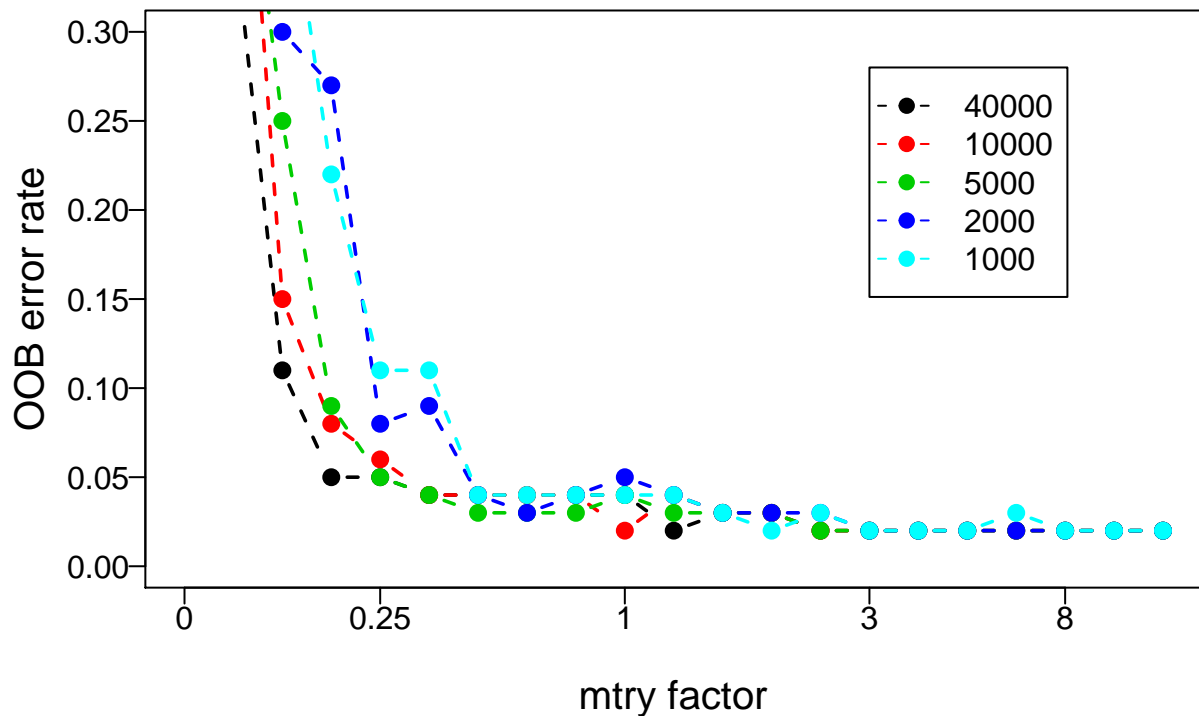

4 classes; 1 dimensions; 20 genes/dimen.; nodesize = 5

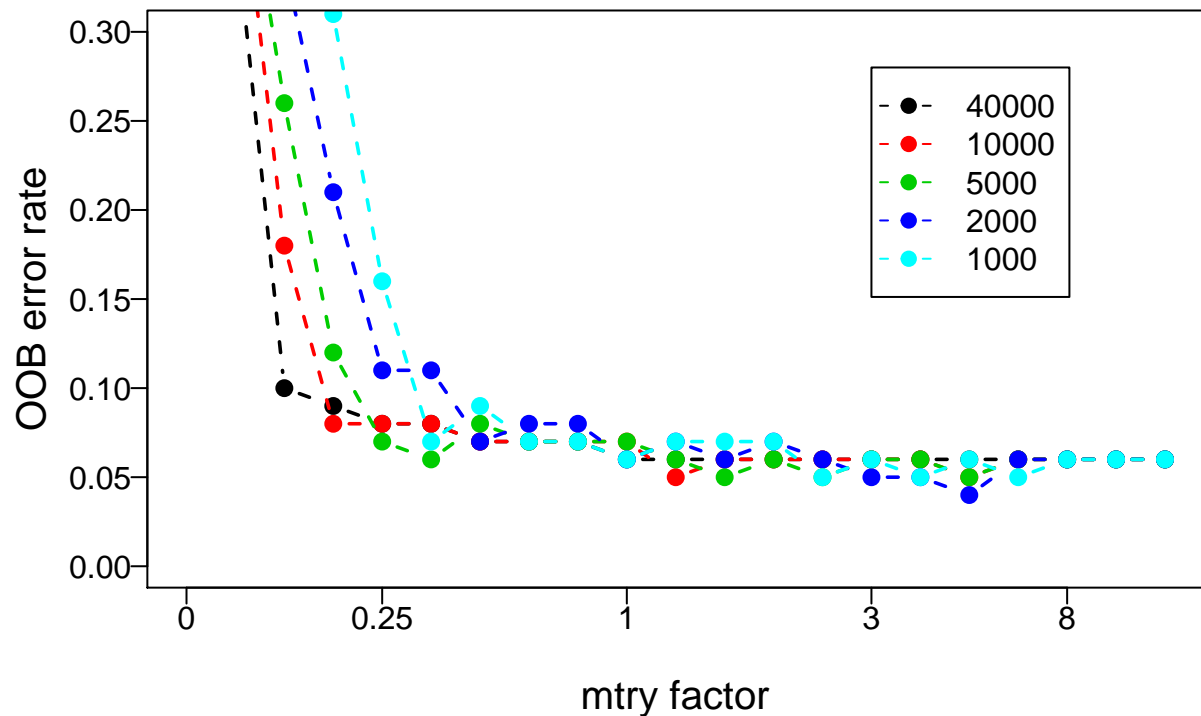



4 classes; 1 dimensions; 100 genes/dimen.; nodesize = 5

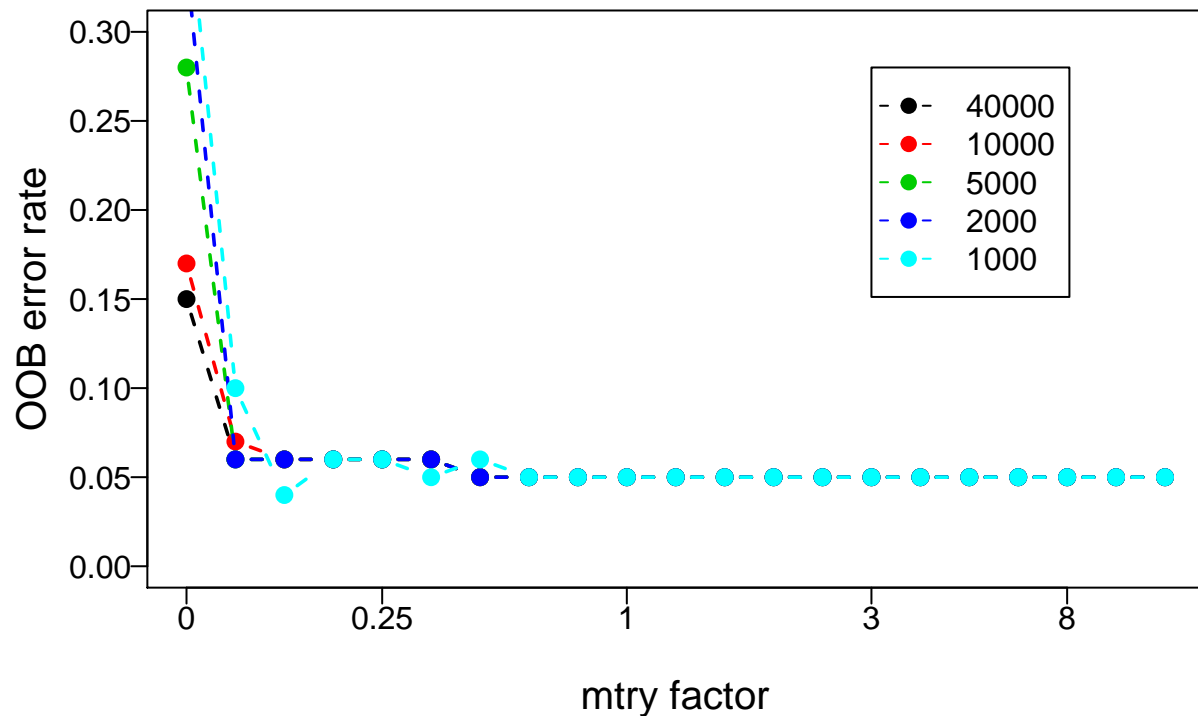

4 classes; 1 dimensions; 100 genes/dimen.; nodesize = 5

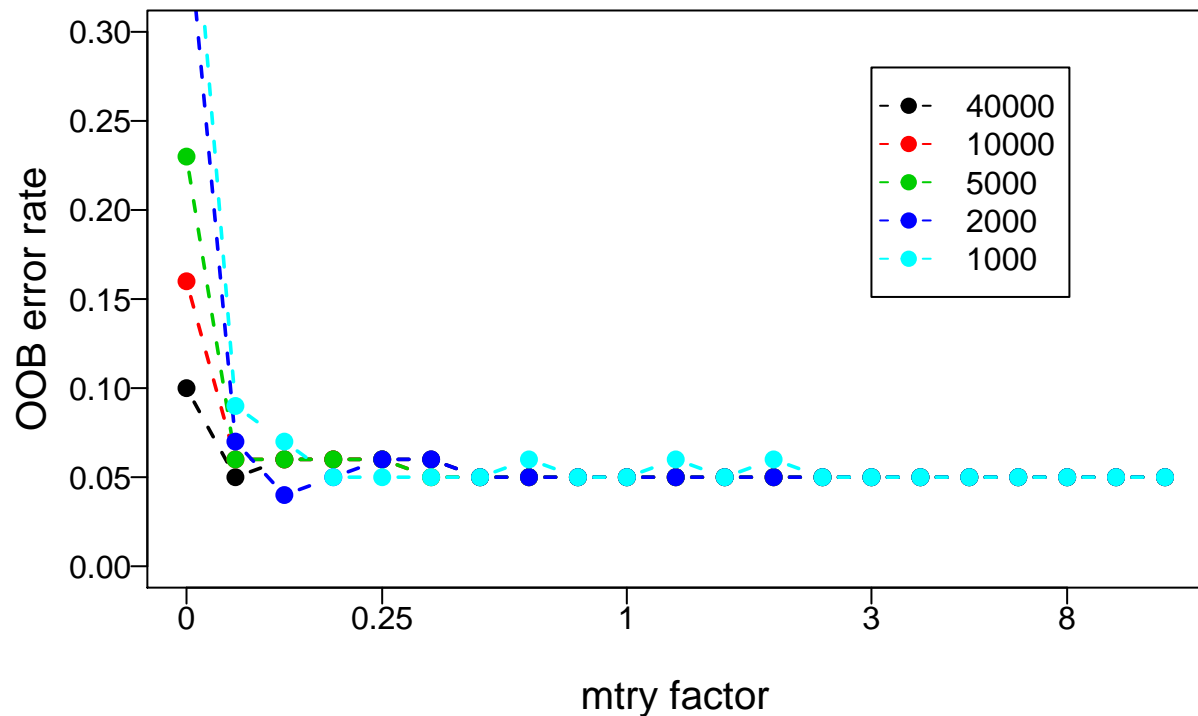

4 classes; 1 dimensions; 100 genes/dimen.; nodesize = 5

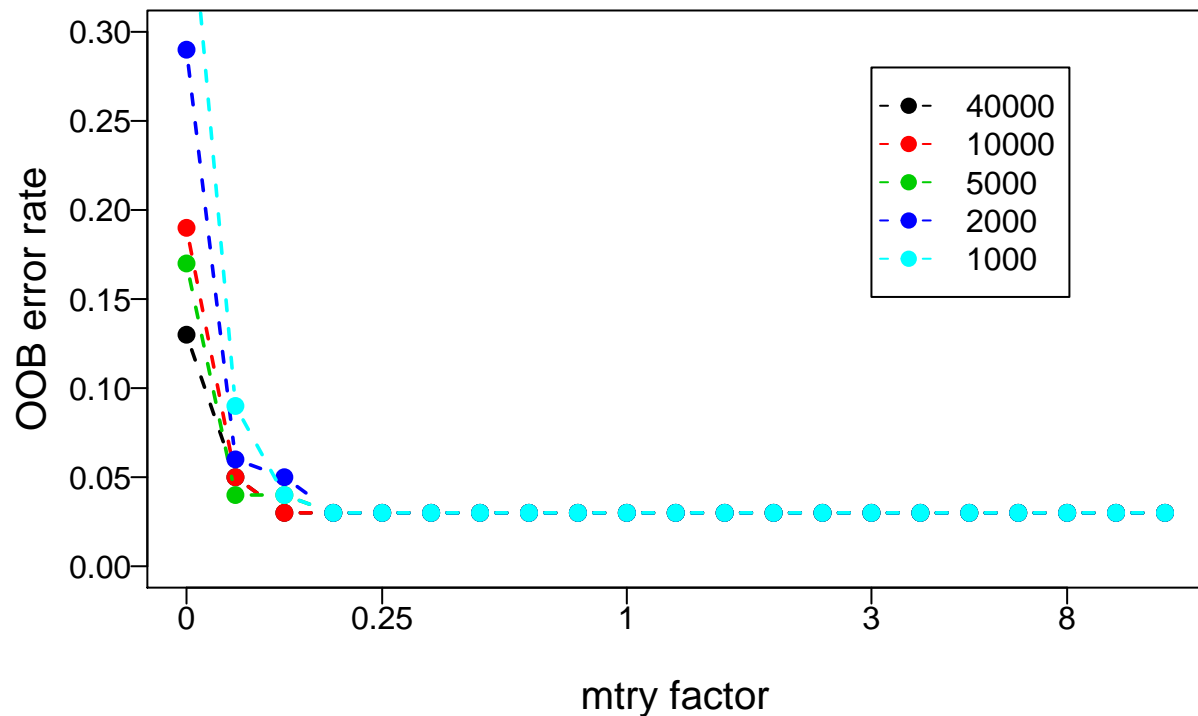

4 classes; 1 dimensions; 100 genes/dimen.; nodesize = 5

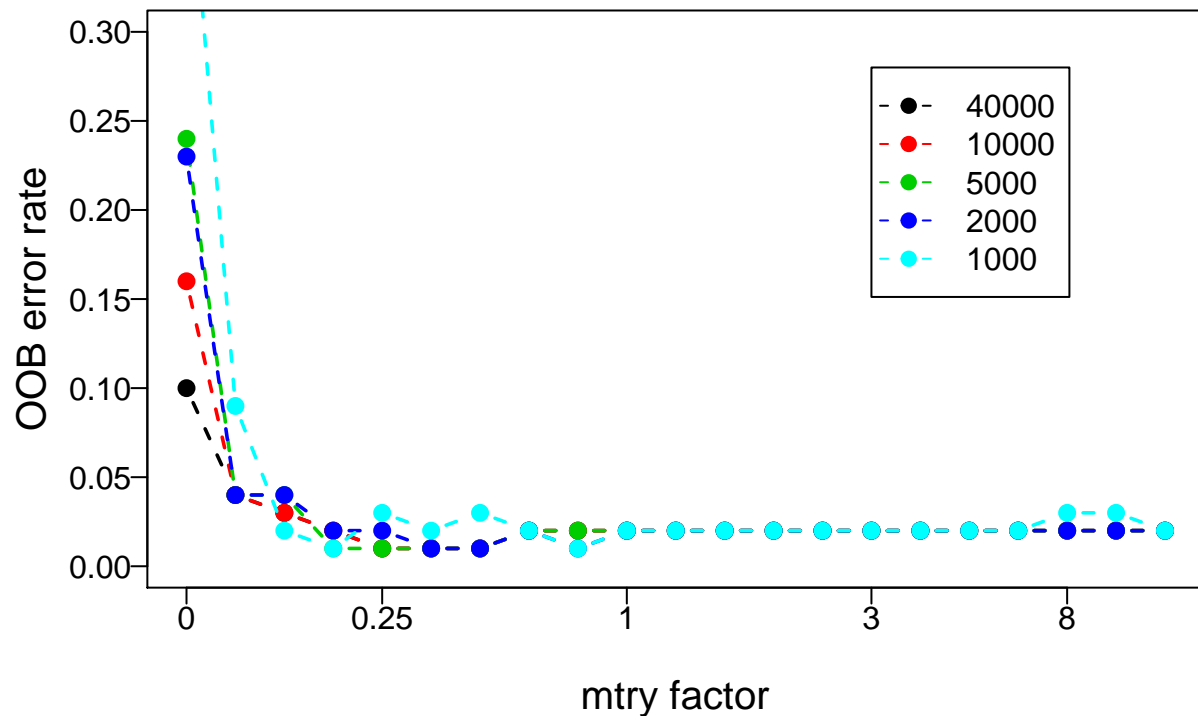

4 classes; 2 dimensions; 5 genes/dimen.; nodesize = 5

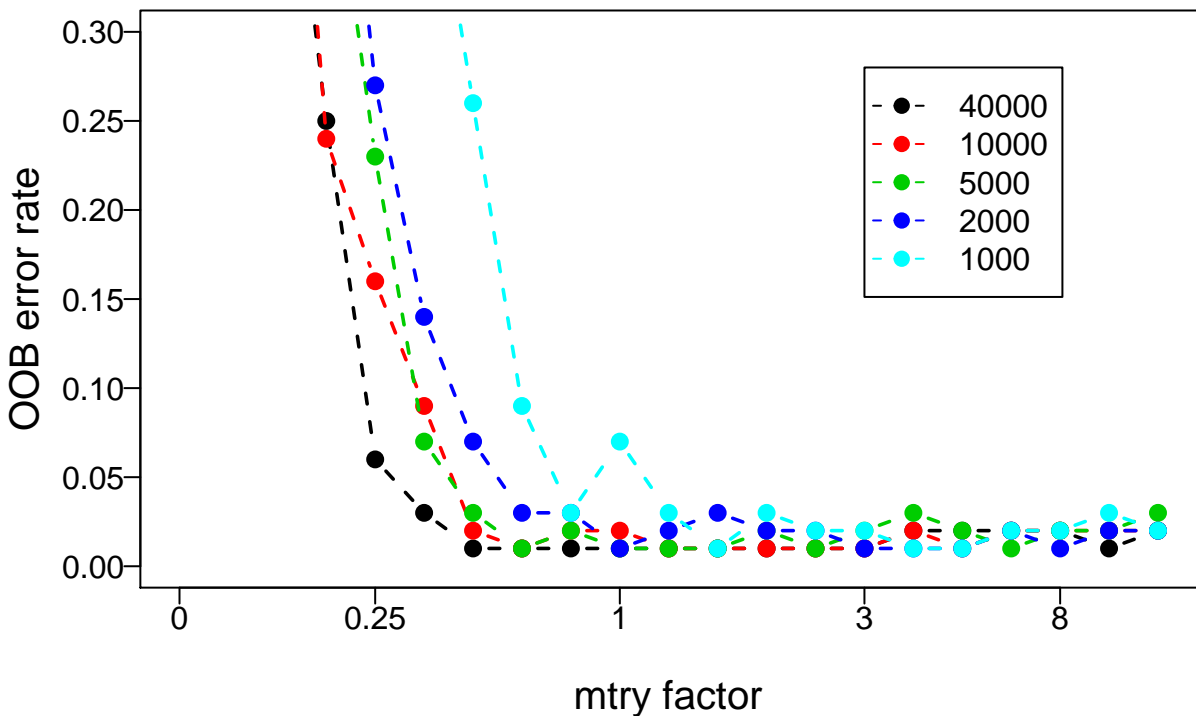

4 classes; 2 dimensions; 5 genes/dimen.; nodesize = 5

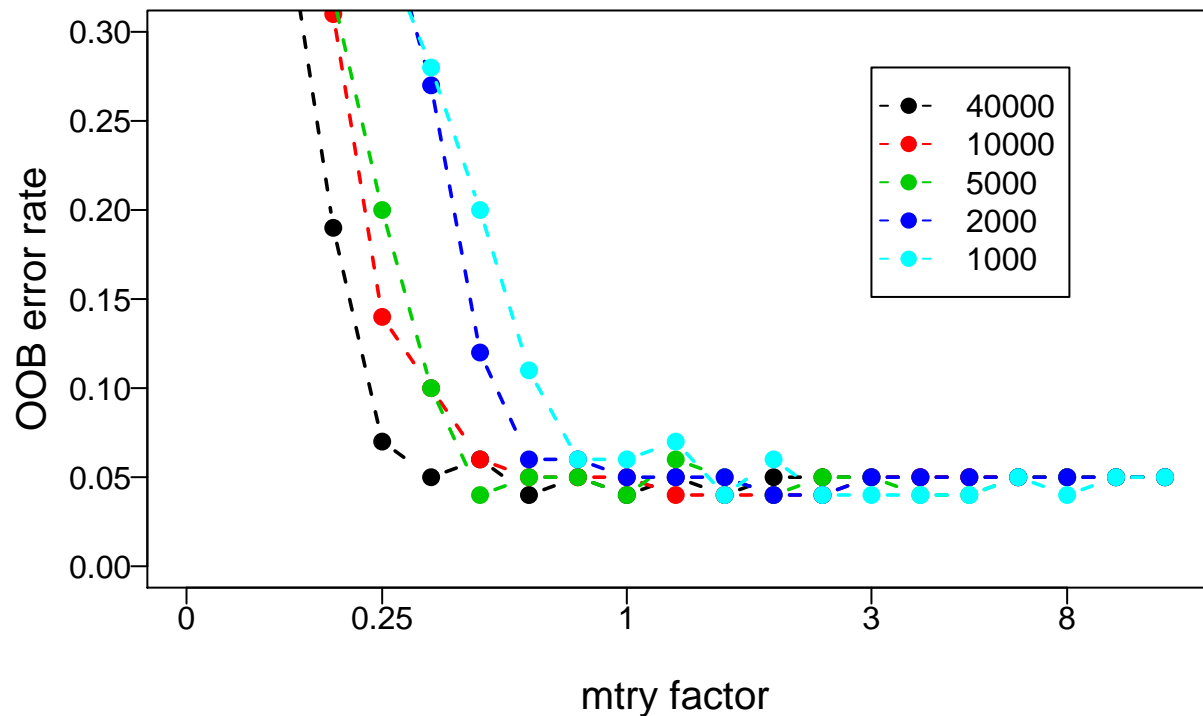

4 classes; 2 dimensions; 5 genes/dimen.; nodesize = 5

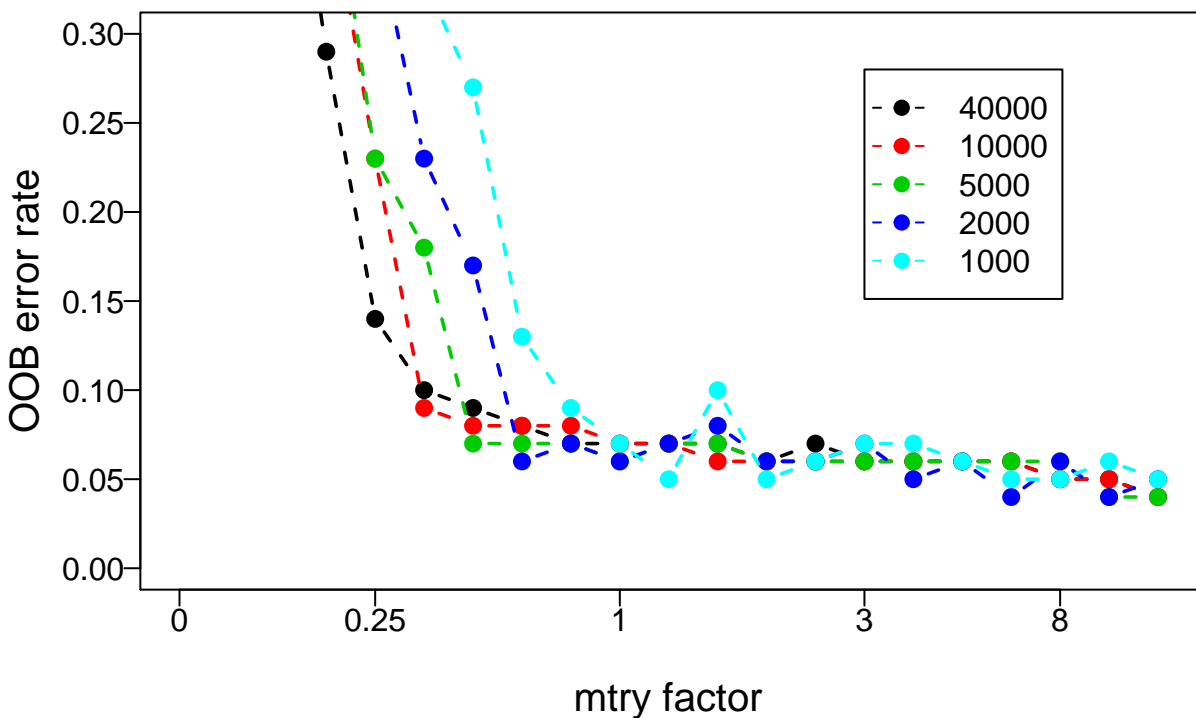

4 classes; 2 dimensions; 5 genes/dimen.; nodesize = 5

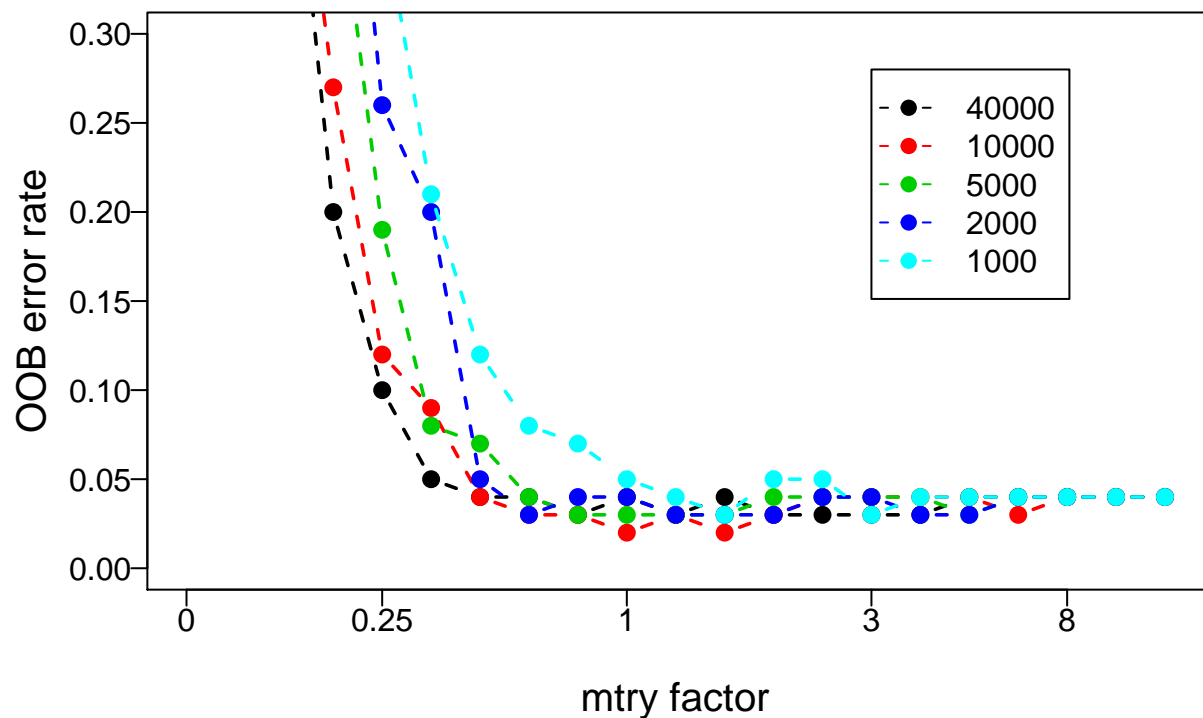

4 classes; 2 dimensions; 20 genes/dimen.; nodesize = 5

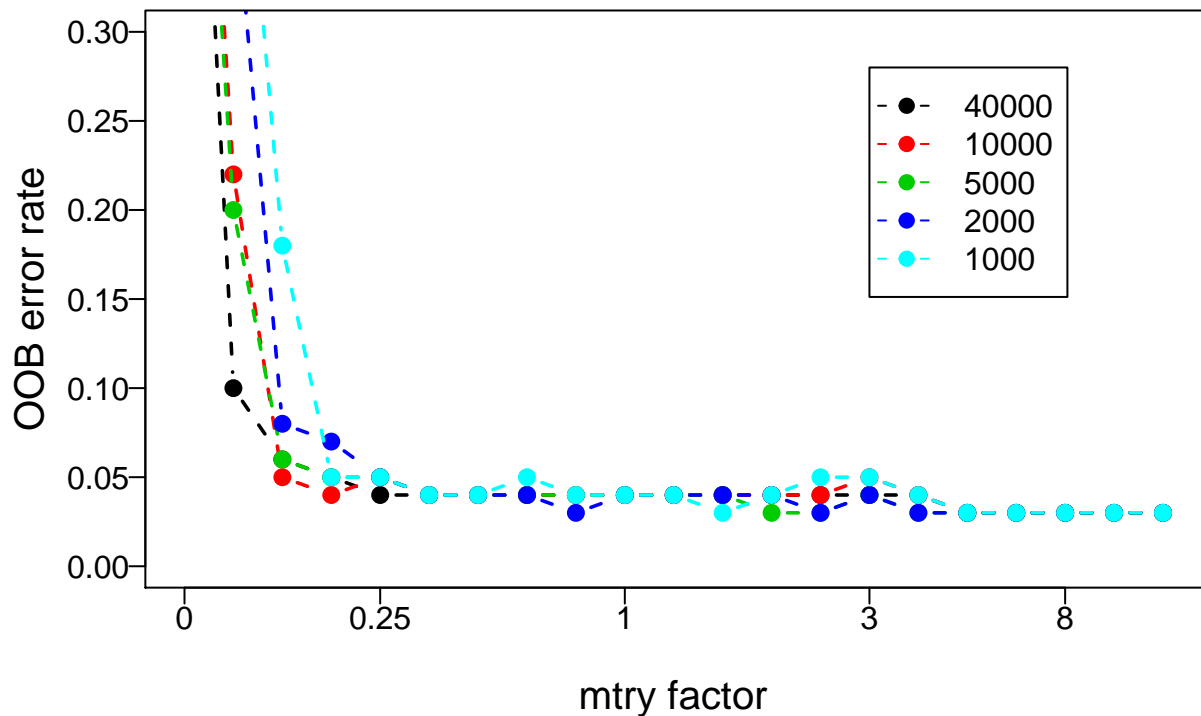

4 classes; 2 dimensions; 20 genes/dimen.; nodesize = 5

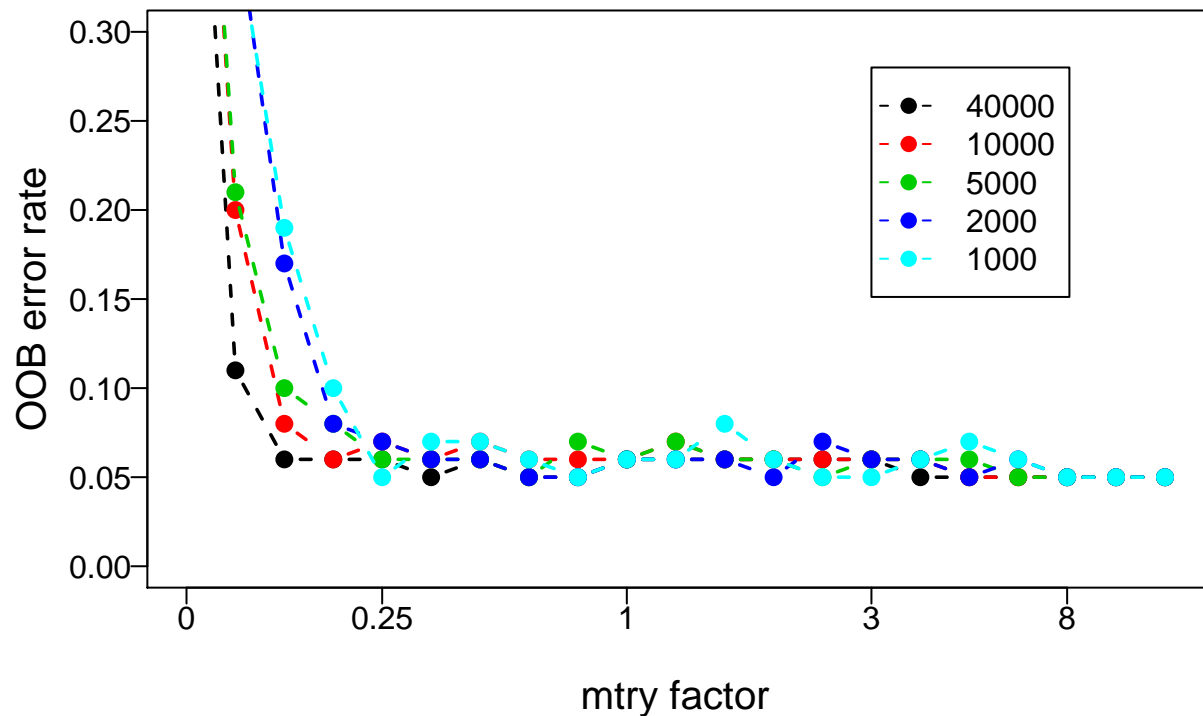

4 classes; 2 dimensions; 20 genes/dimen.; nodesize = 5

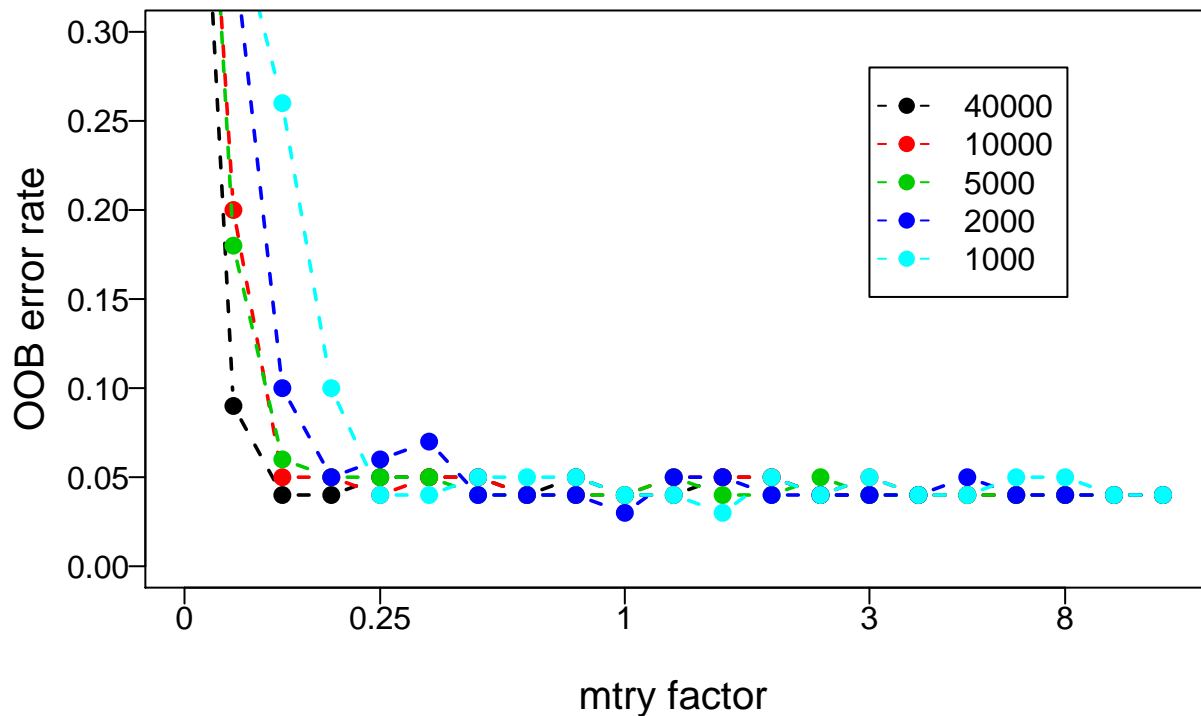

4 classes; 2 dimensions; 20 genes/dimen.; nodesize = 5

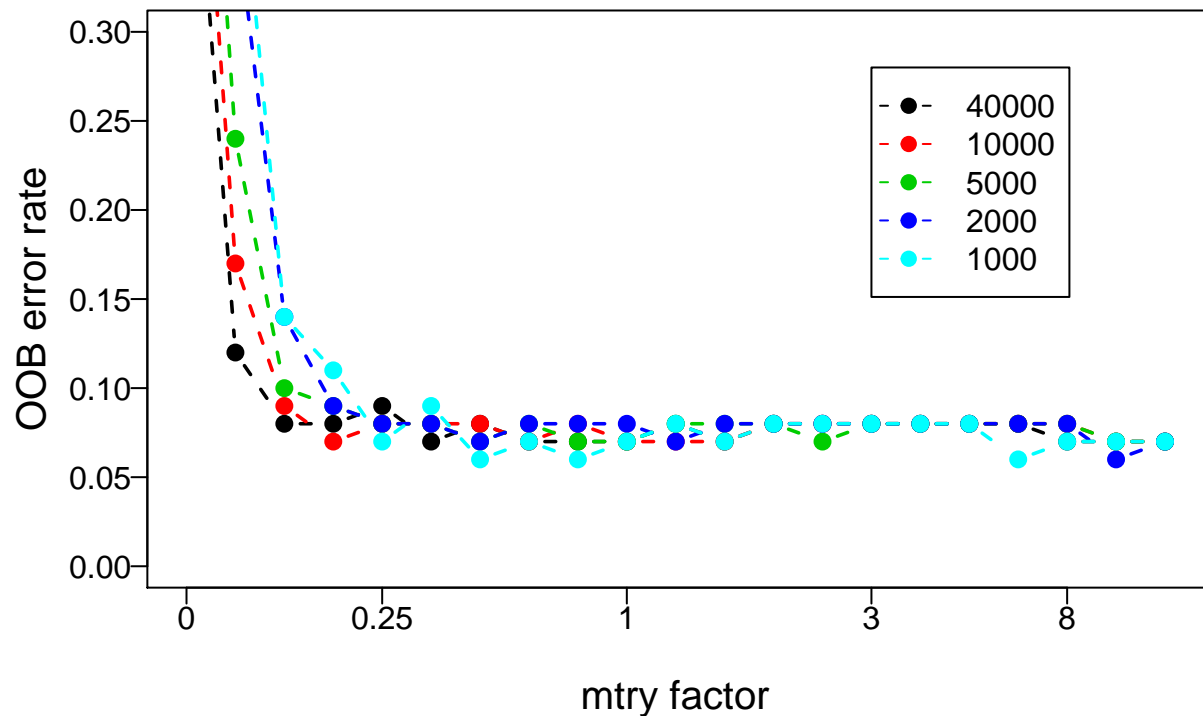

4 classes; 2 dimensions; 100 genes/dimen.; nodesize = 5

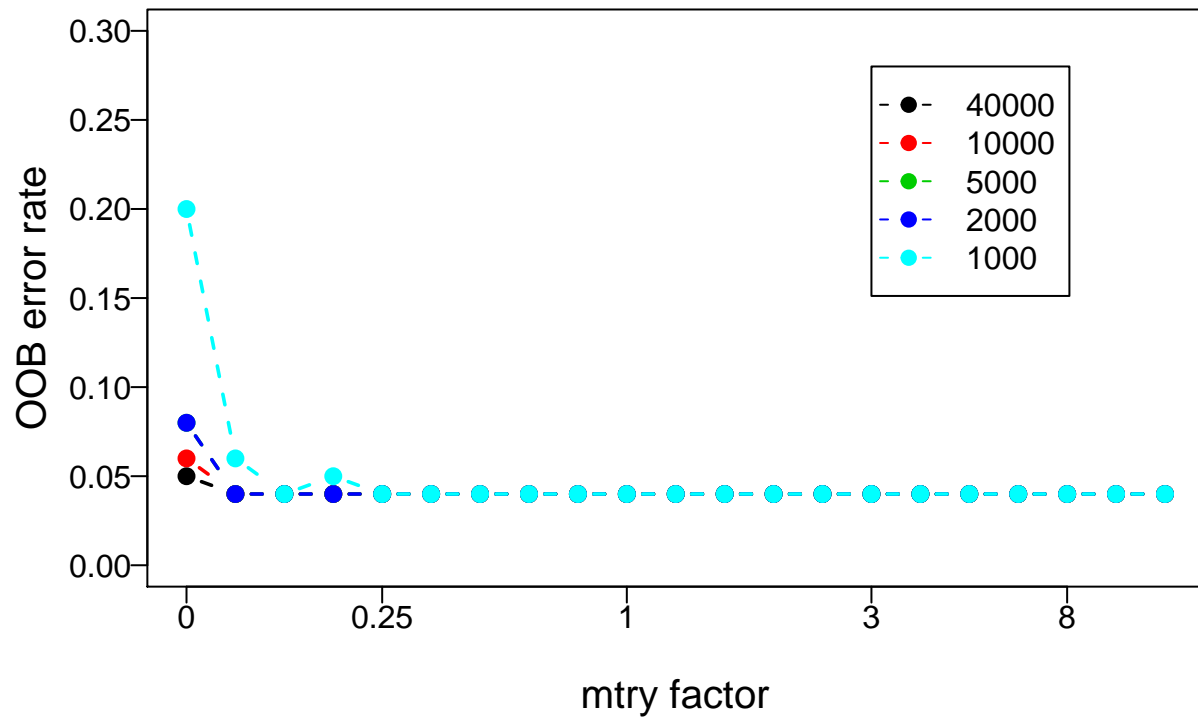

4 classes; 2 dimensions; 100 genes/dimen.; nodesize = 5

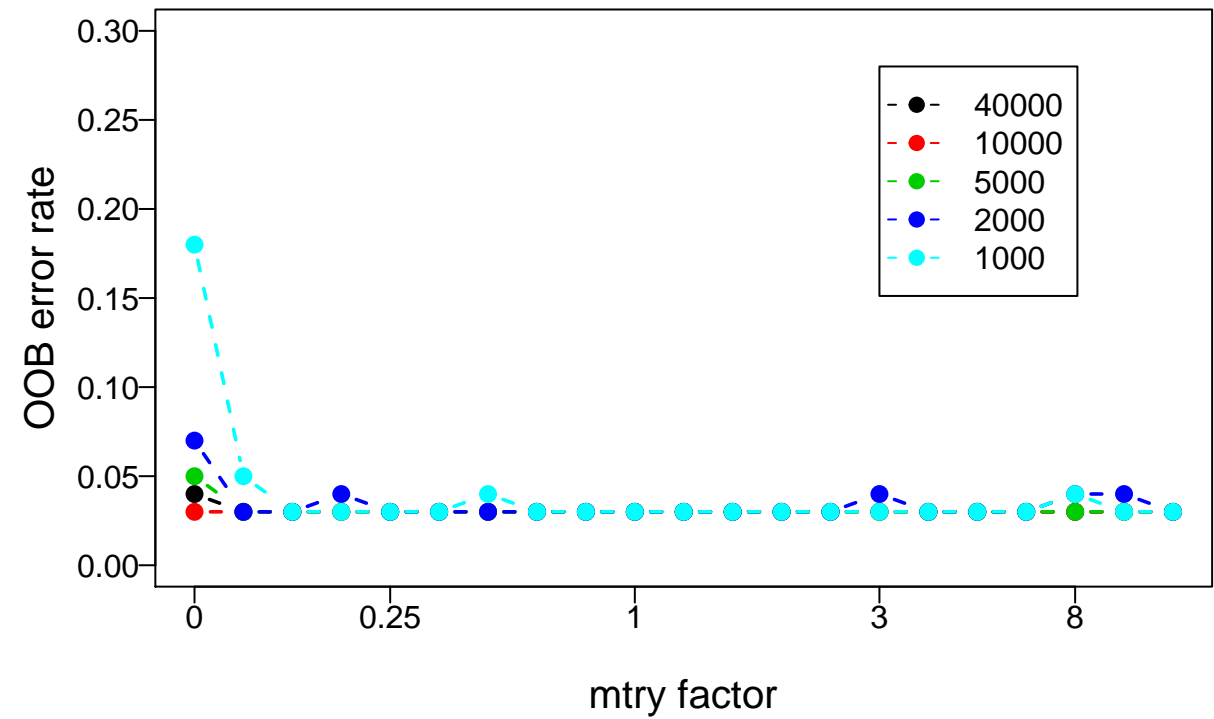

4 classes; 2 dimensions; 100 genes/dimen.; nodesize = 5

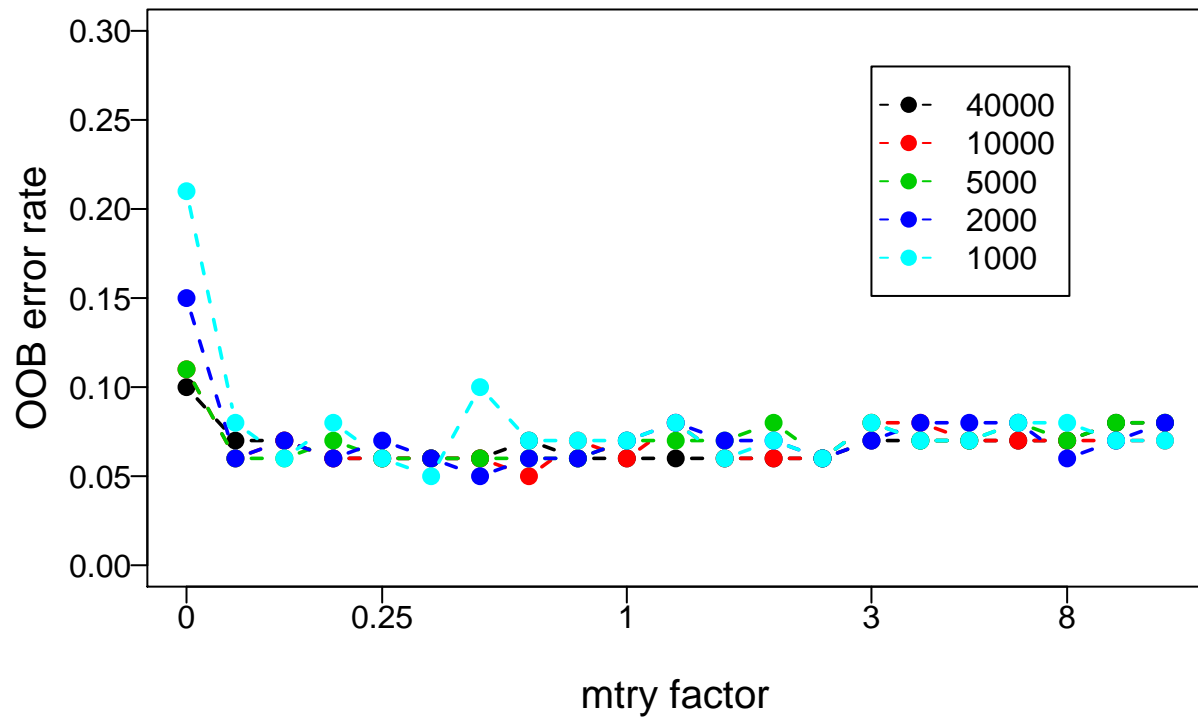

4 classes; 2 dimensions; 100 genes/dimen.; nodesize = 5

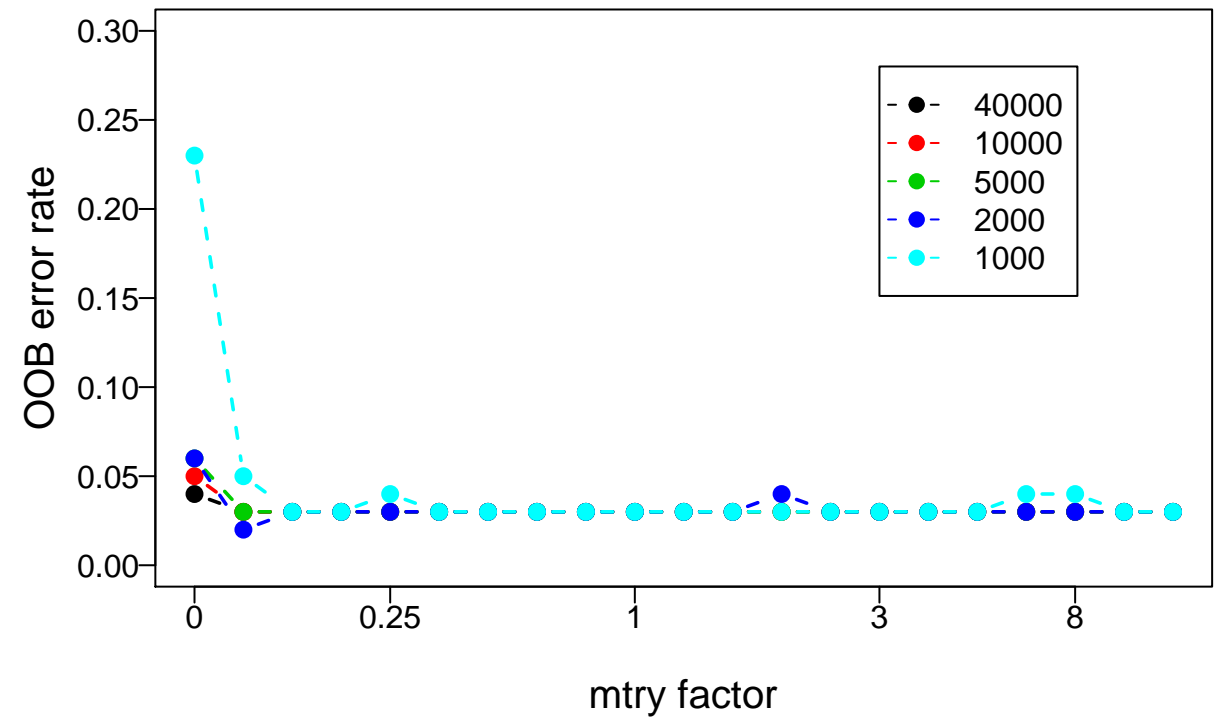

4 classes; 3 dimensions; 5 genes/dimen.; nodesize = 5

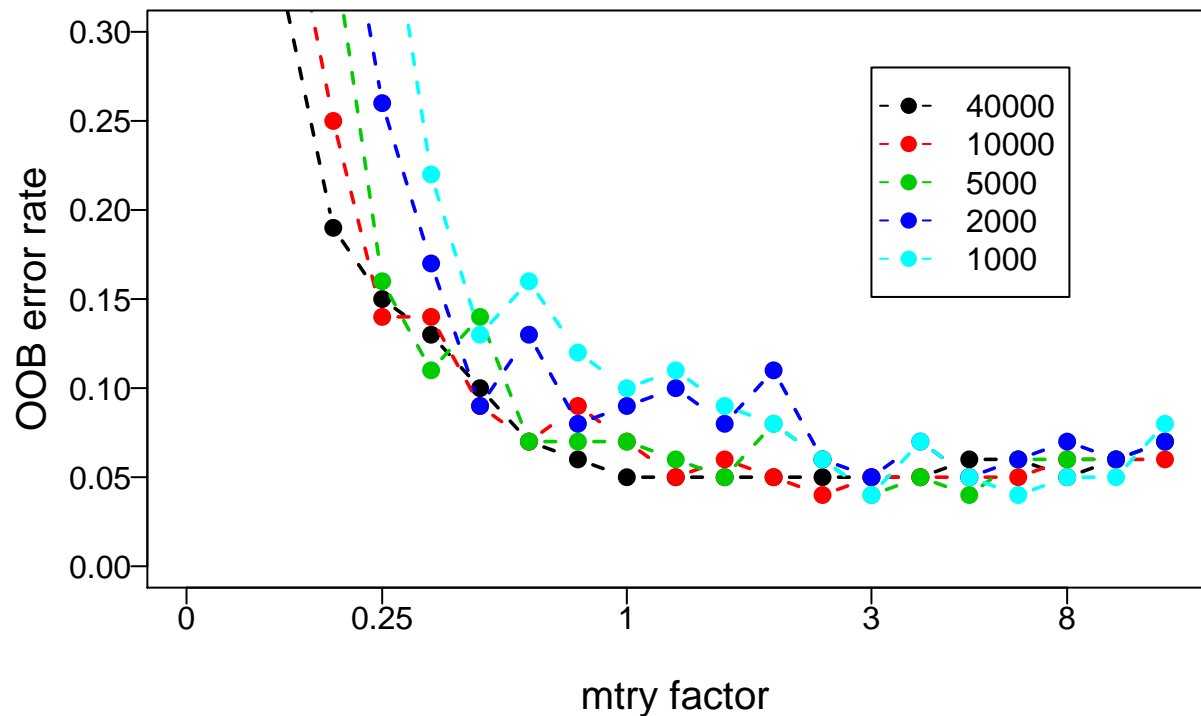

4 classes; 3 dimensions; 5 genes/dimen.; nodesize = 5

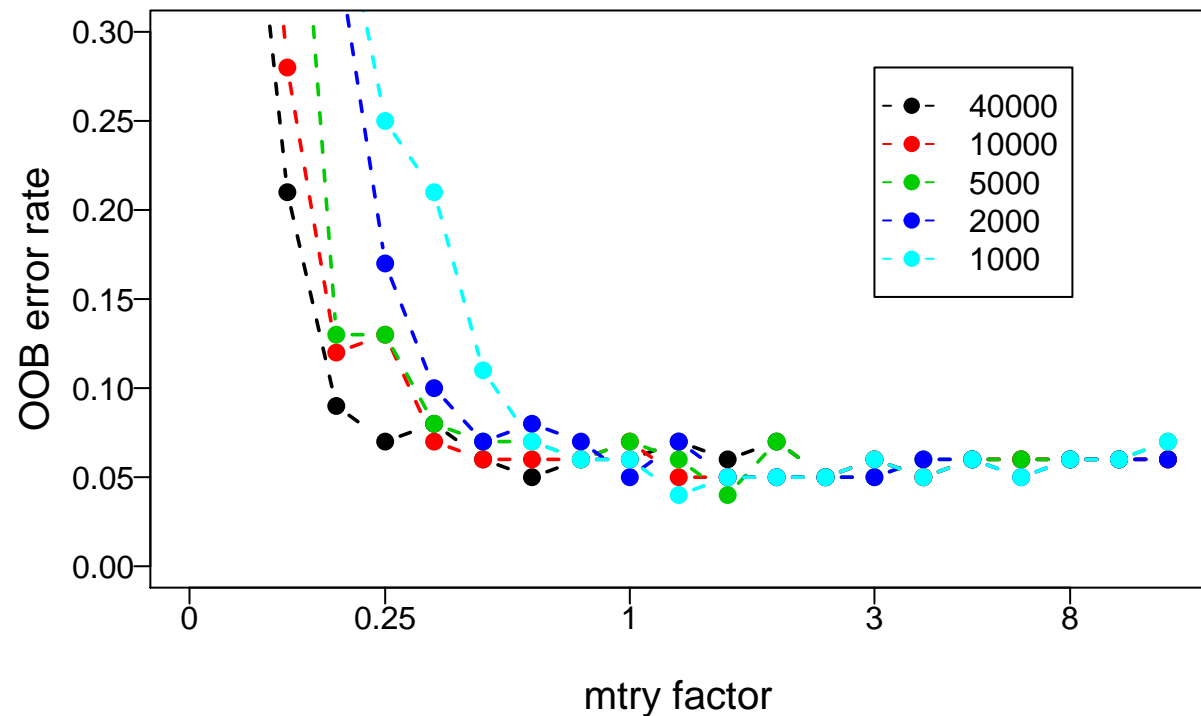

4 classes; 3 dimensions; 5 genes/dimen.; nodesize = 5

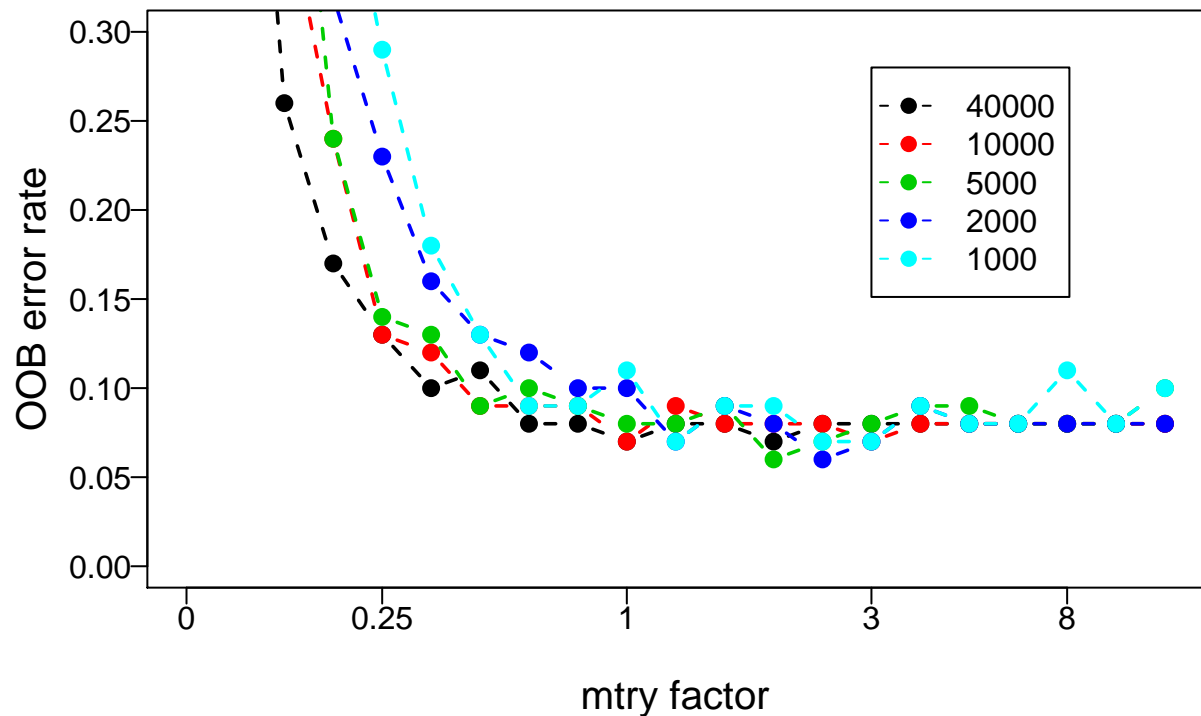

4 classes; 3 dimensions; 5 genes/dimen.; nodesize = 5

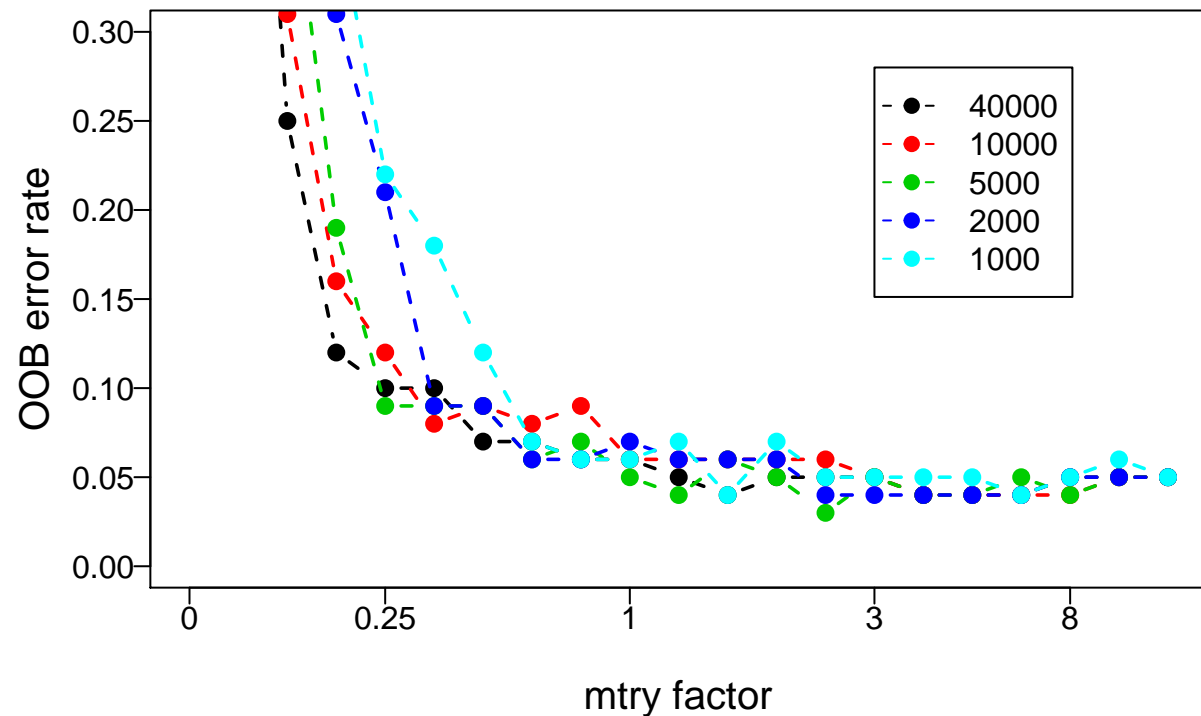

4 classes; 3 dimensions; 20 genes/dimen.; nodesize = 5

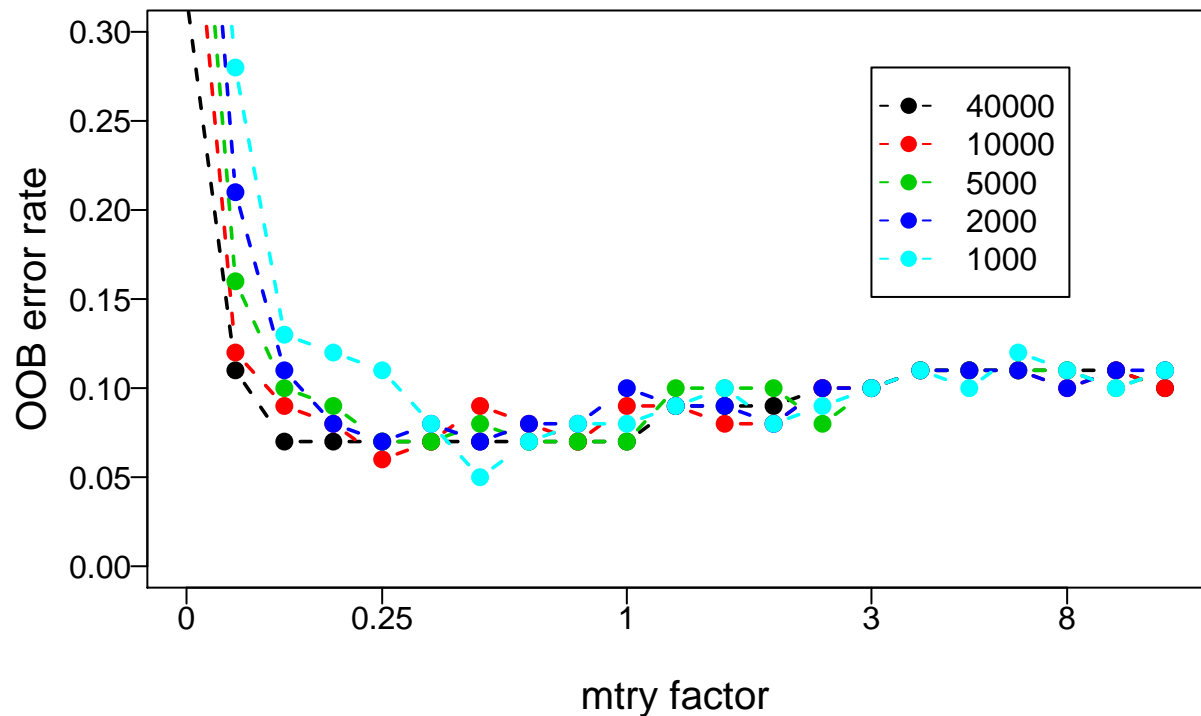

4 classes; 3 dimensions; 20 genes/dimen.; nodesize = 5

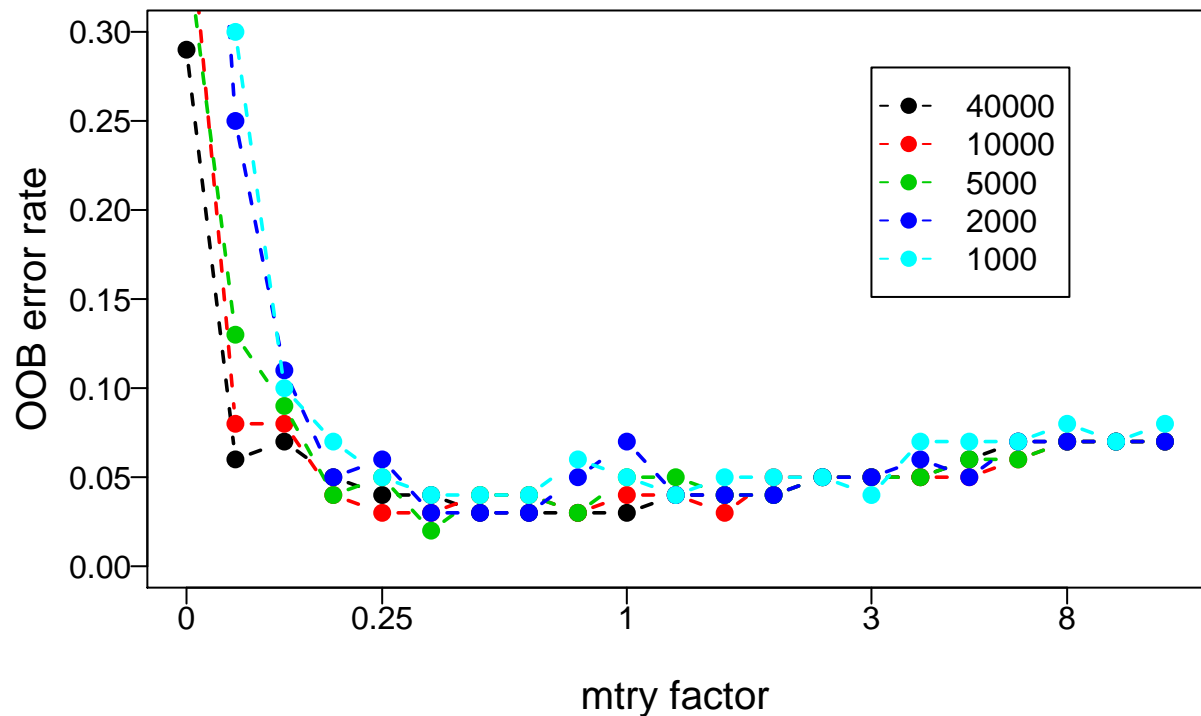

4 classes; 3 dimensions; 20 genes/dimen.; nodesize = 5

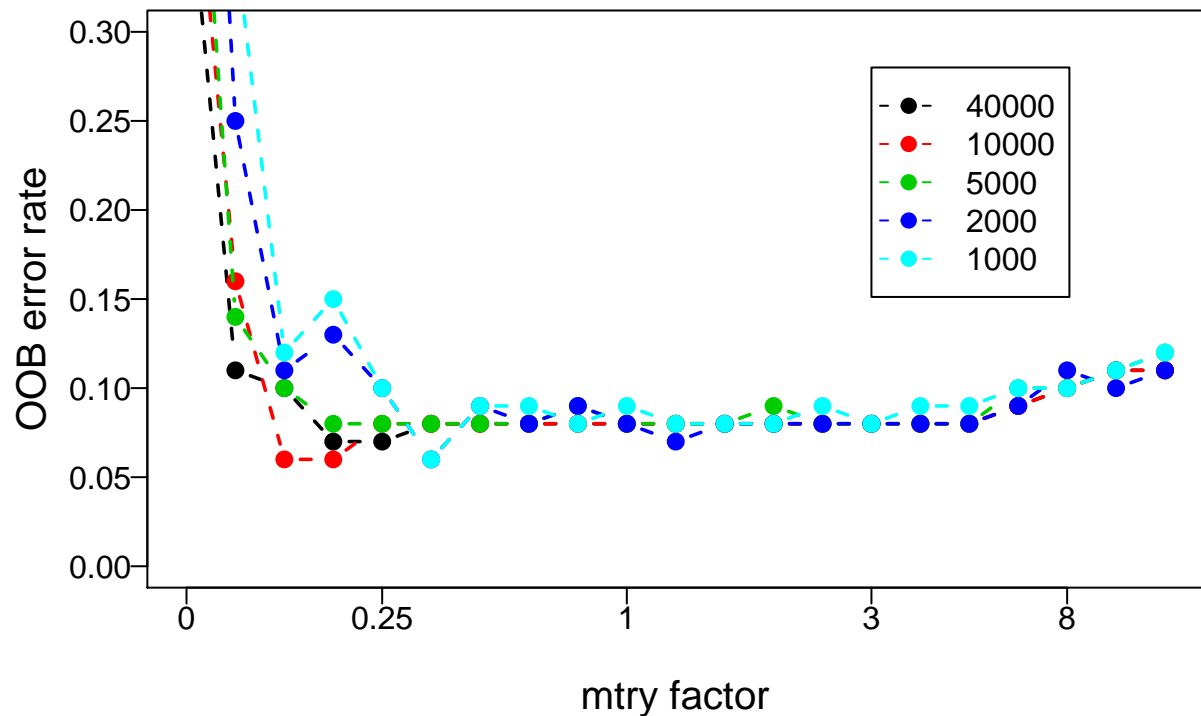

4 classes; 3 dimensions; 20 genes/dimen.; nodesize = 5

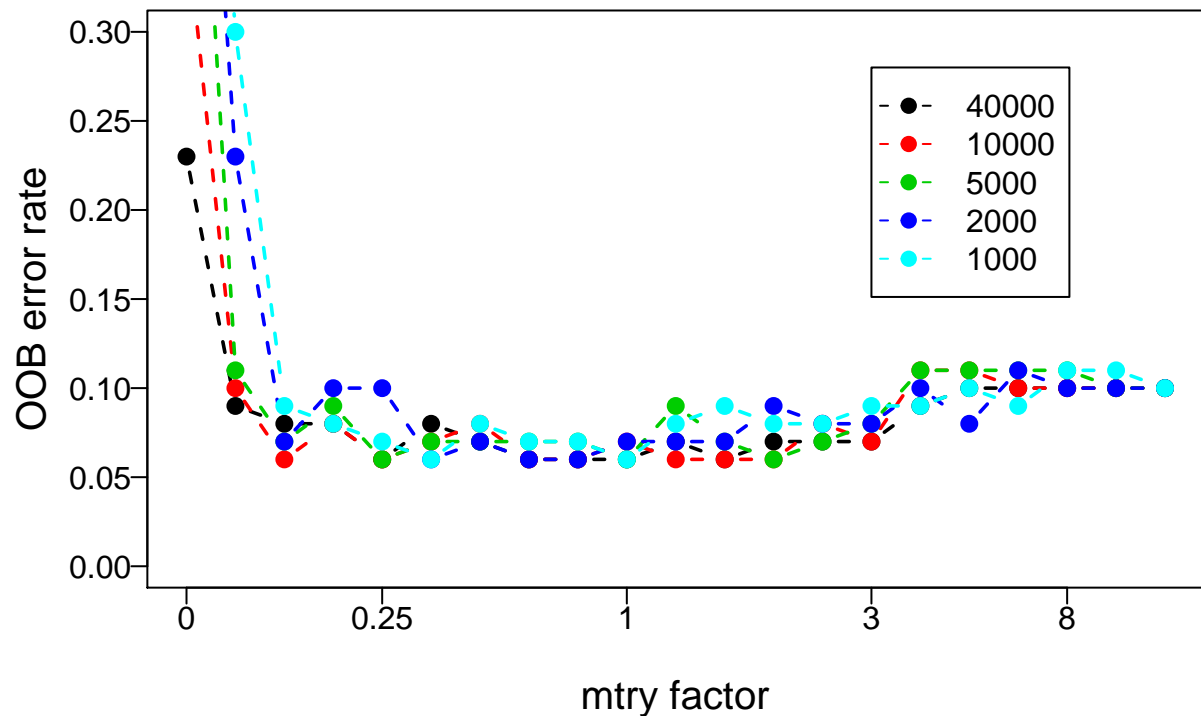

4 classes; 3 dimensions; 100 genes/dimen.; nodesize = 5

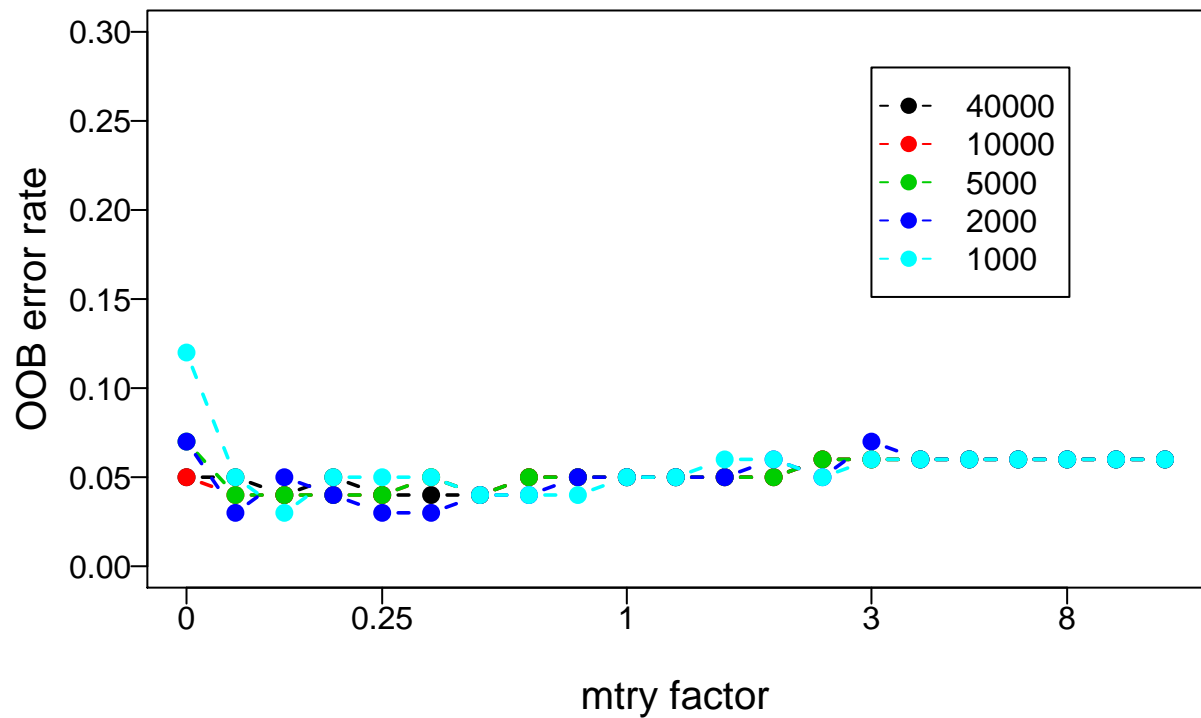

4 classes; 3 dimensions; 100 genes/dimen.; nodesize = 5

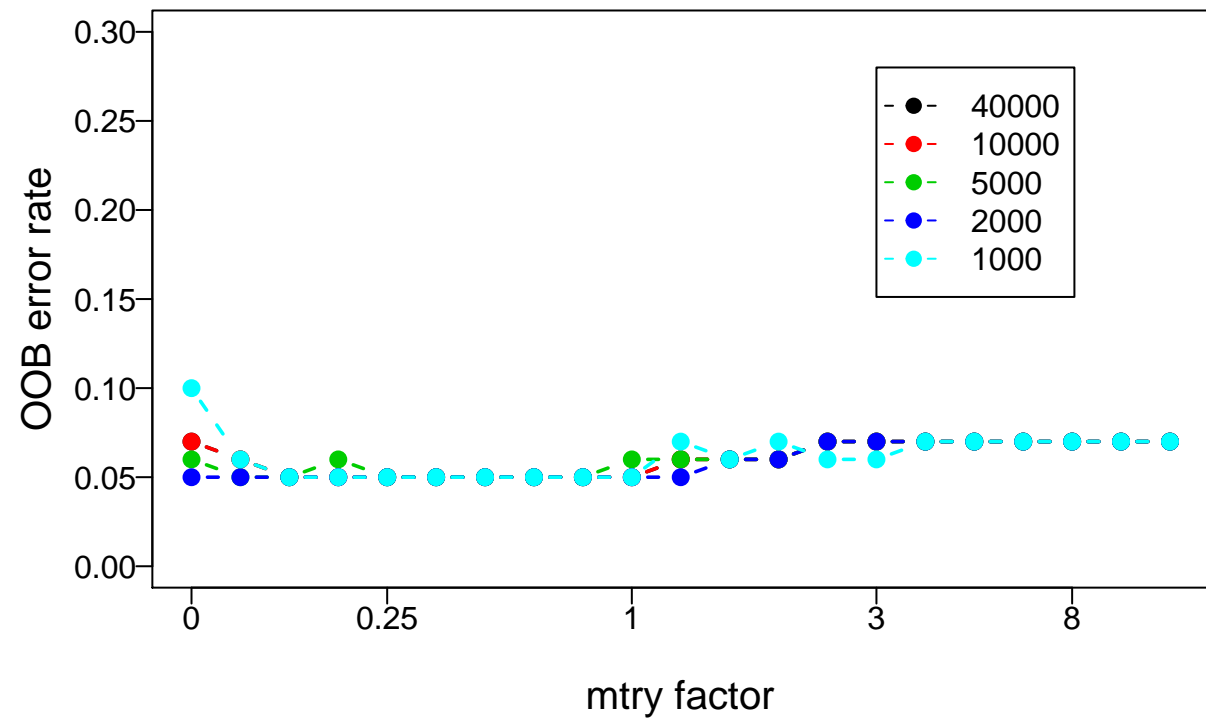

4 classes; 3 dimensions; 100 genes/dimen.; nodesize = 5

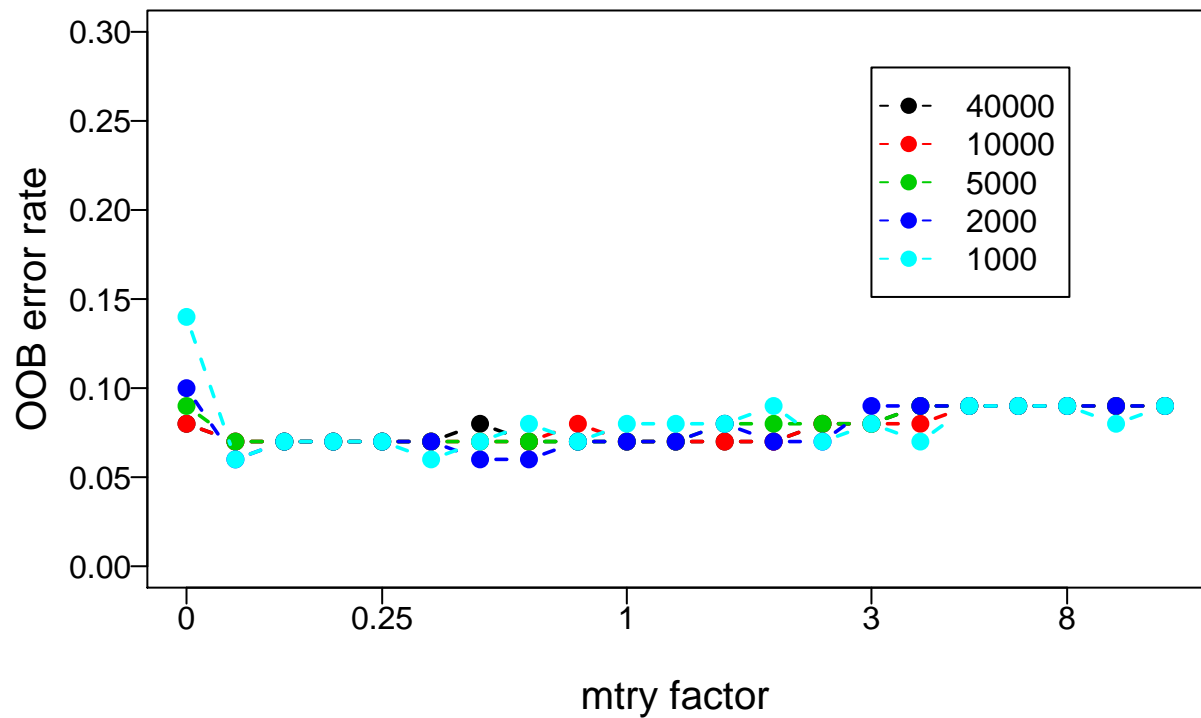

4 classes; 3 dimensions; 100 genes/dimen.; nodesize = 5

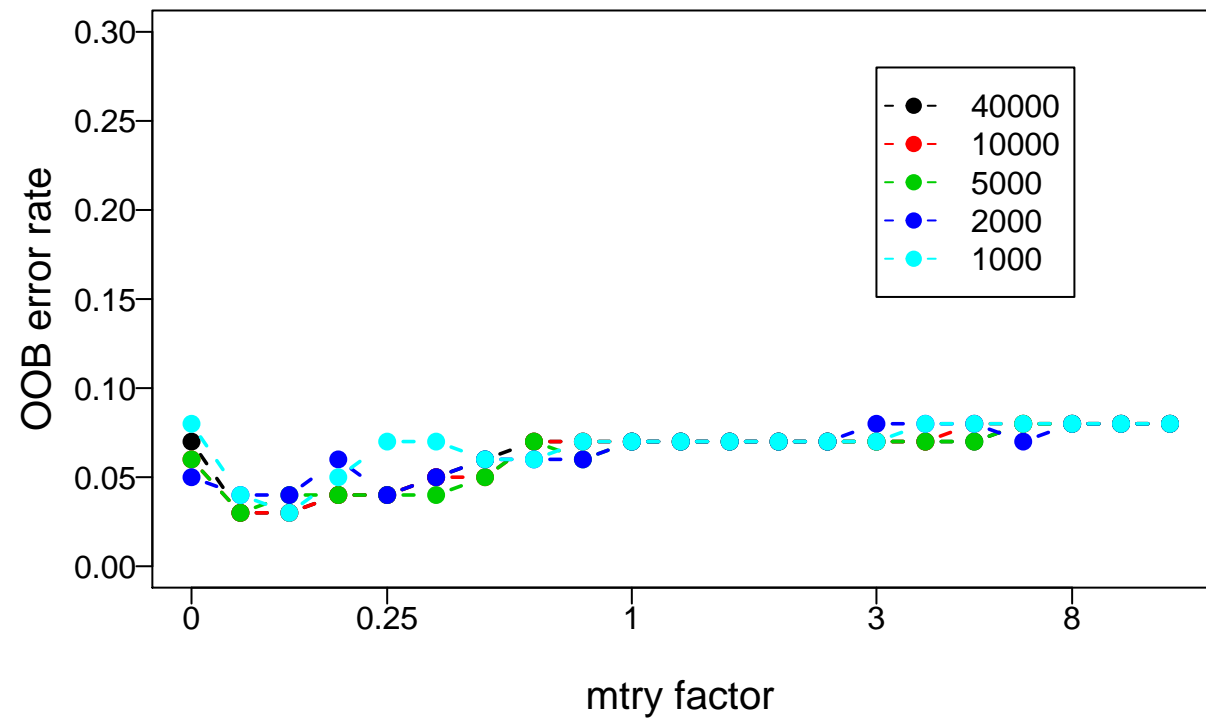

4 classes; 3 dimensions; 100 genes/dimen.; nodesize = 5



## II: Simulated data sets:

No signal: 4000 noise random variables

(shown first with nodesize = 1, then nodesize = 5)



No signal: Classes 2 ; nodesize = 1

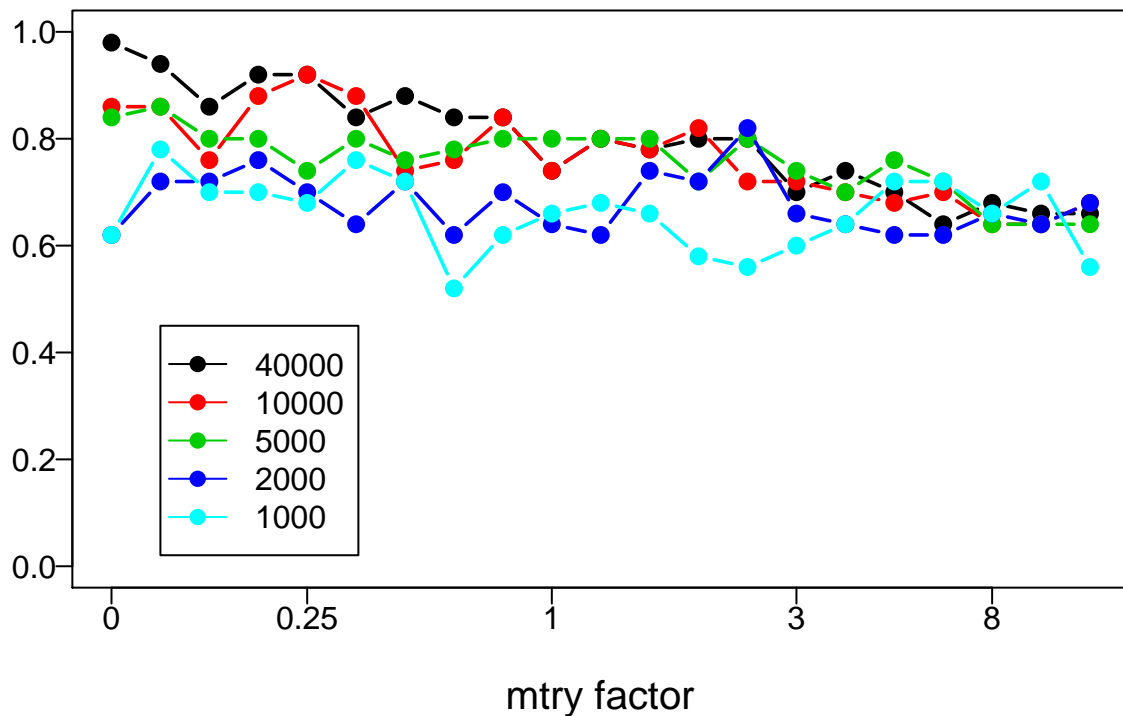

No signal: Classes 2 ; nodesize = 1

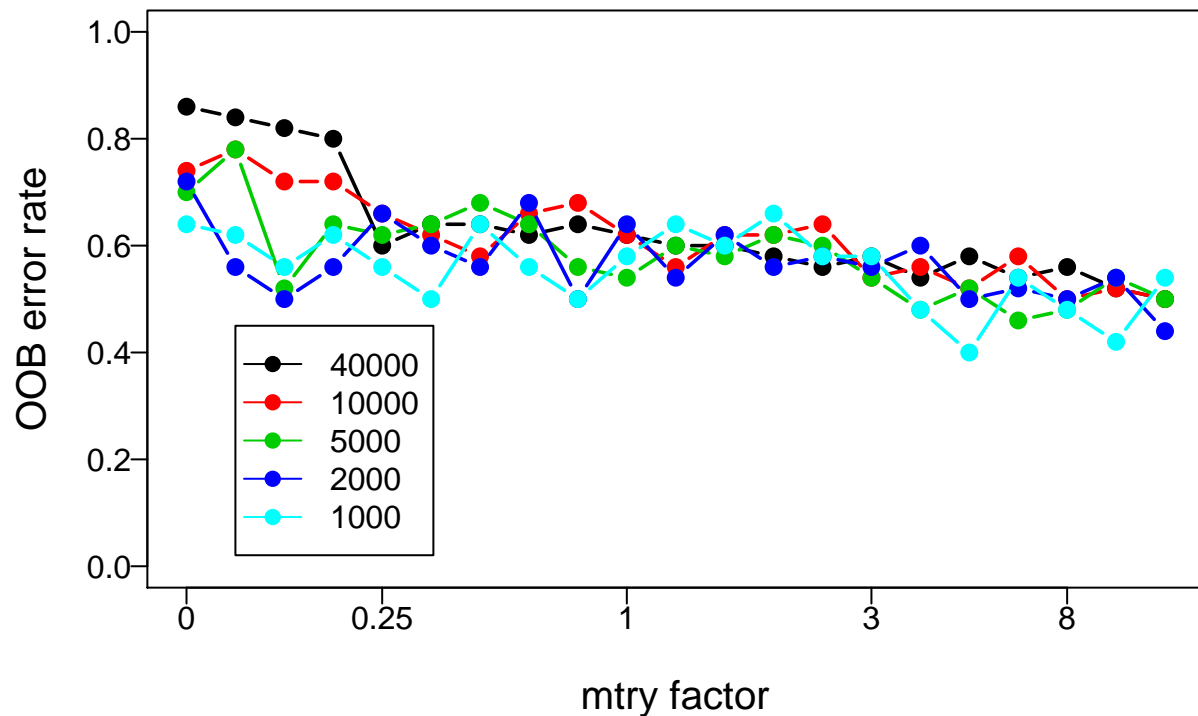

No signal: Classes 2 ; nodesize = 1

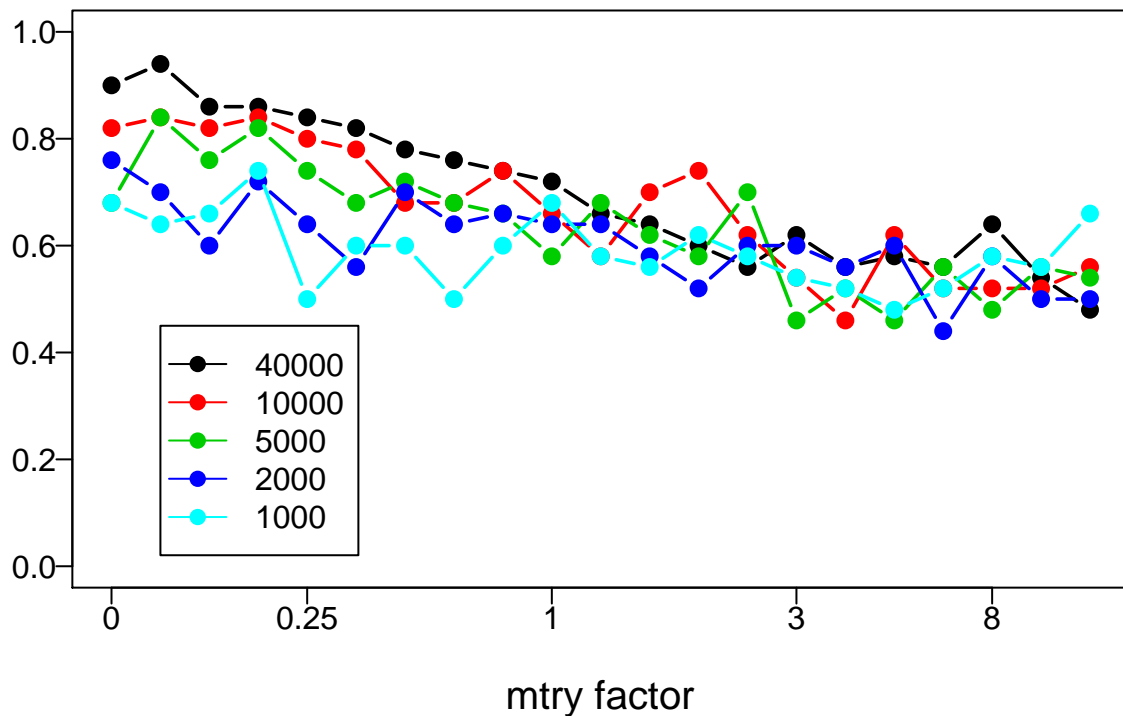

No signal: Classes 2 ; nodesize = 1

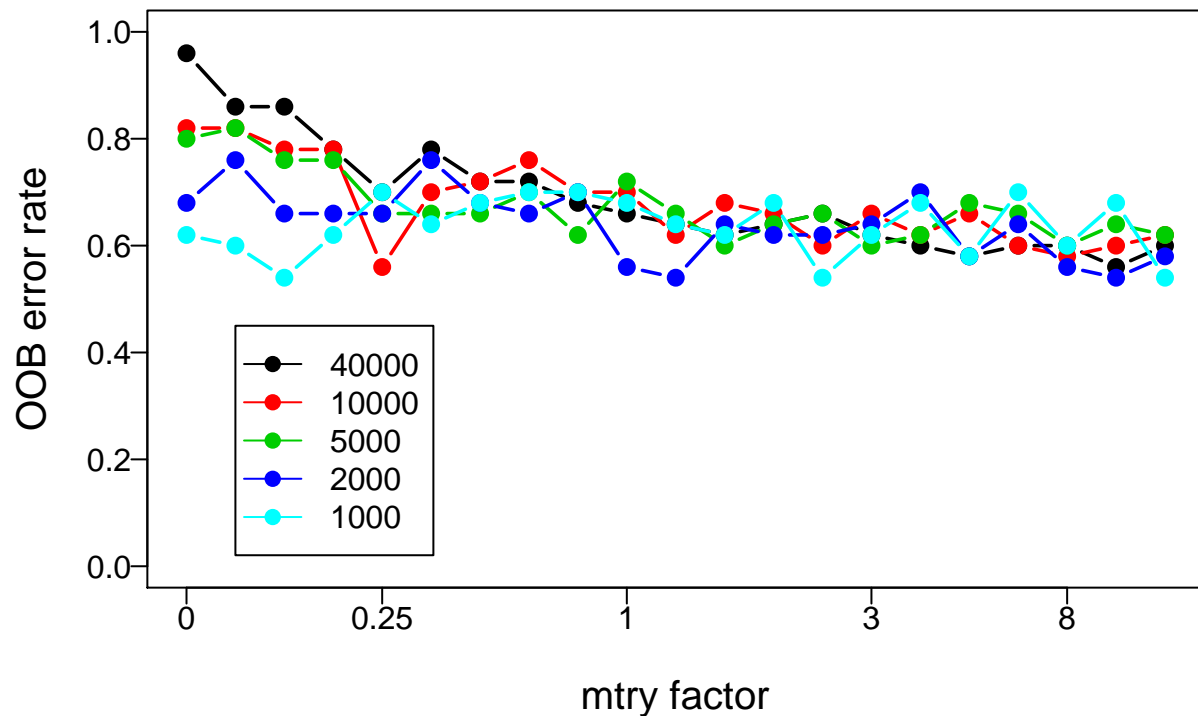

No signal: Classes 3 ; nodesize = 1

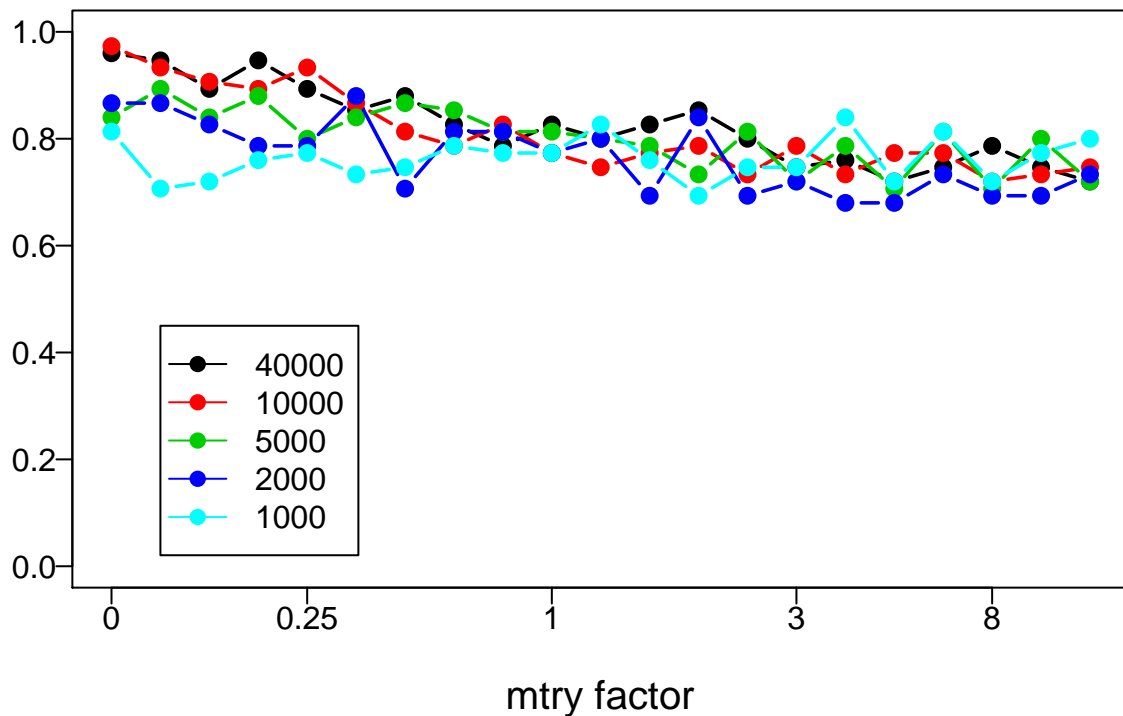

No signal: Classes 3 ; nodesize = 1

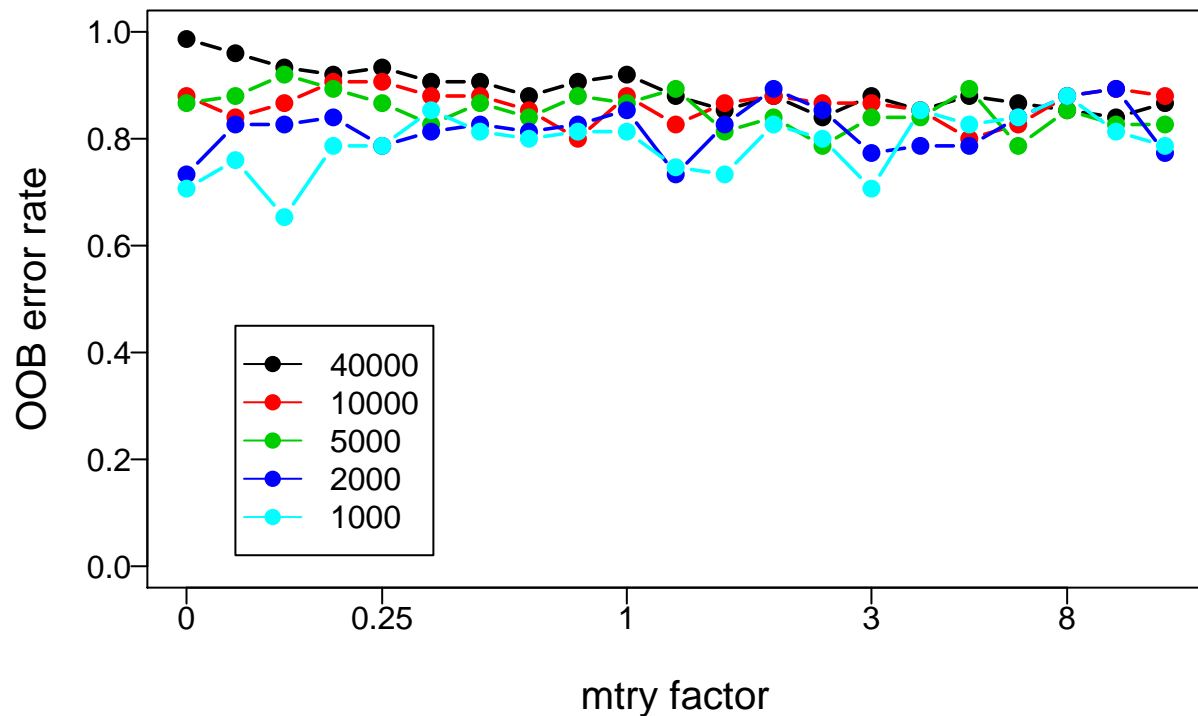

No signal: Classes 3 ; nodesize = 1

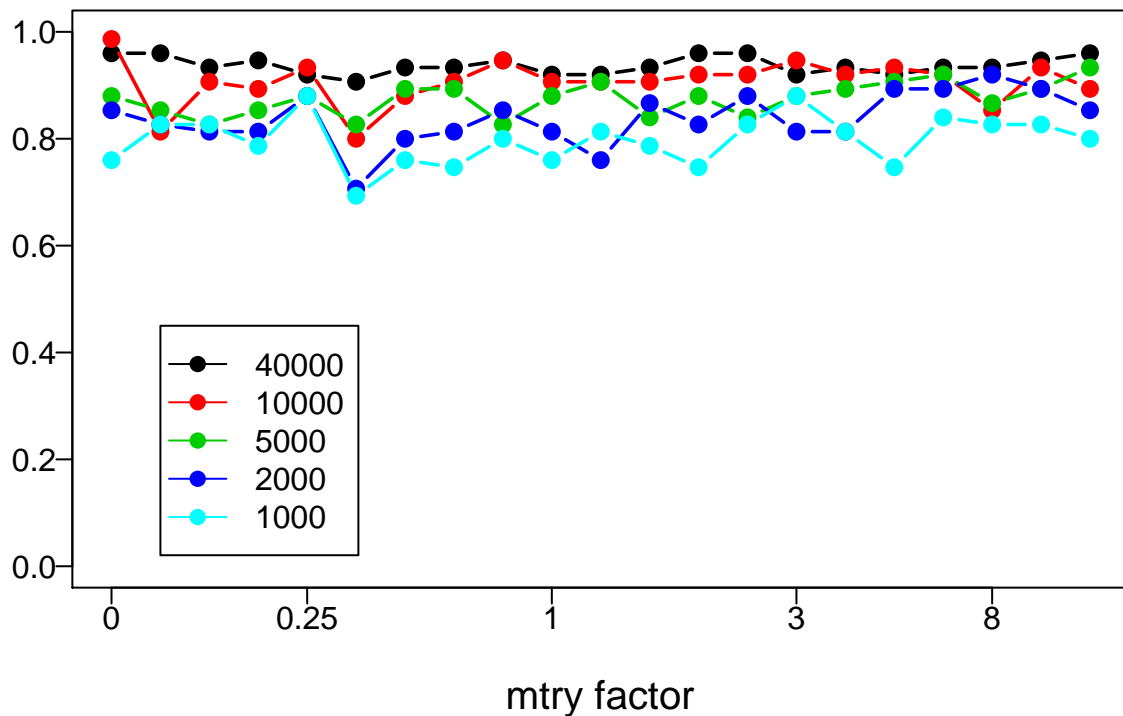

No signal: Classes 3 ; nodesize = 1

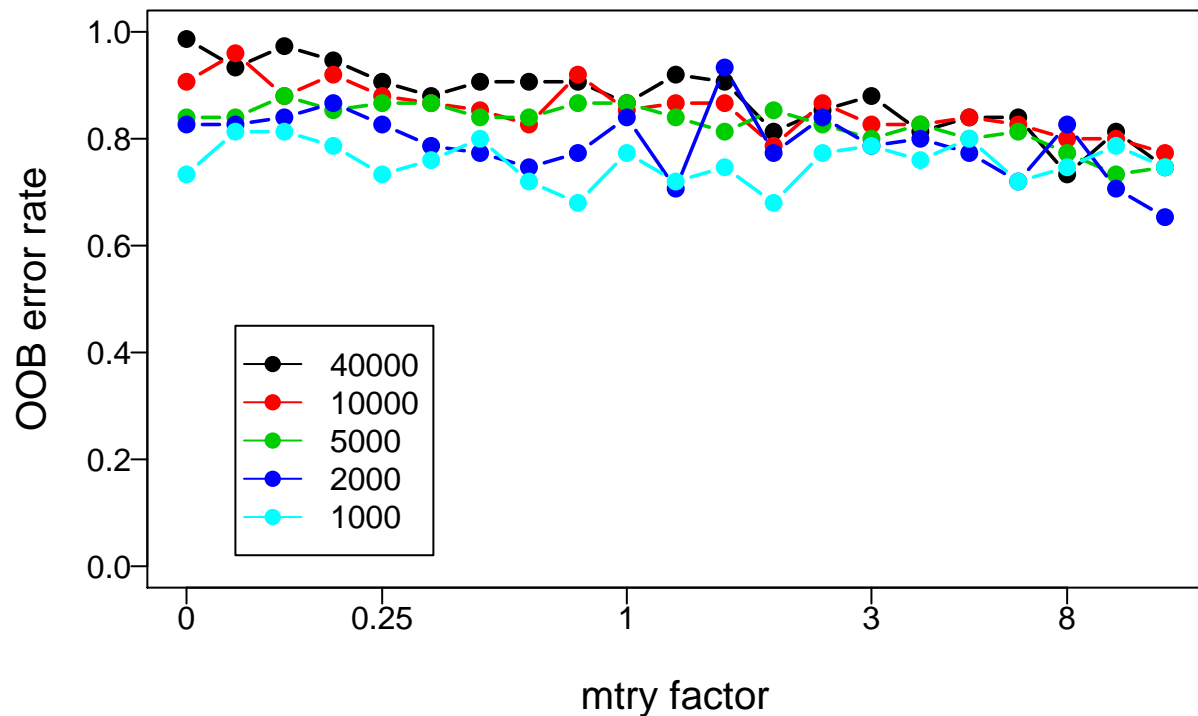

No signal: Classes 4 ; nodesize = 1

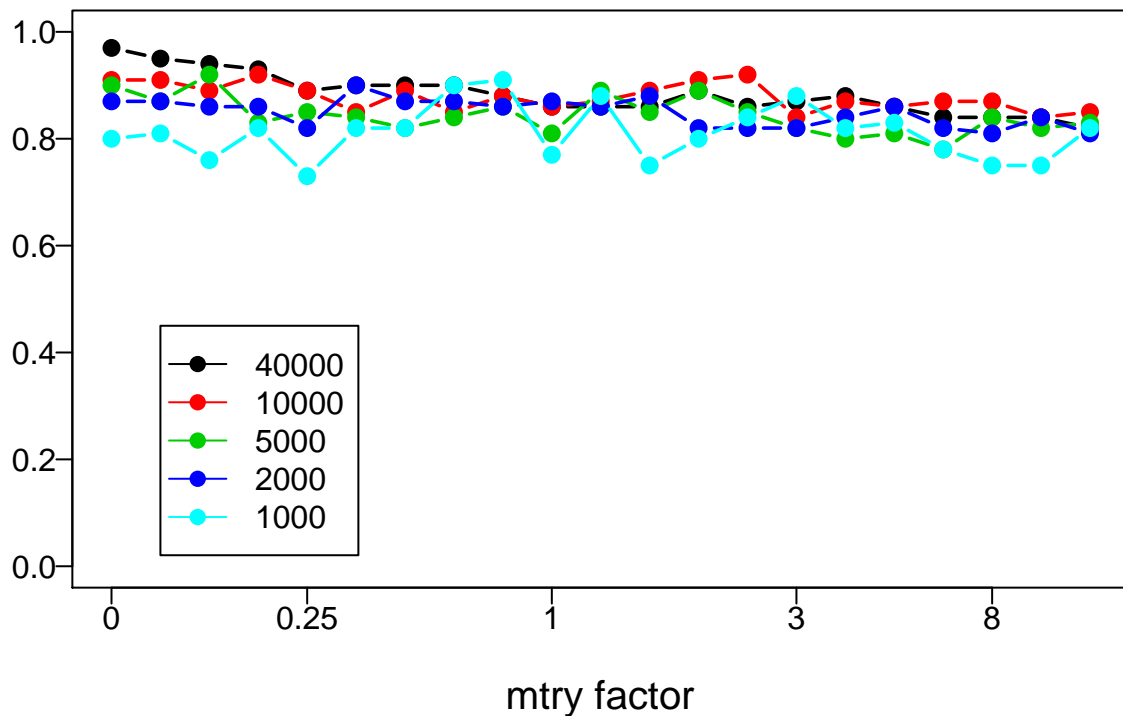

No signal: Classes 4 ; nodesize = 1

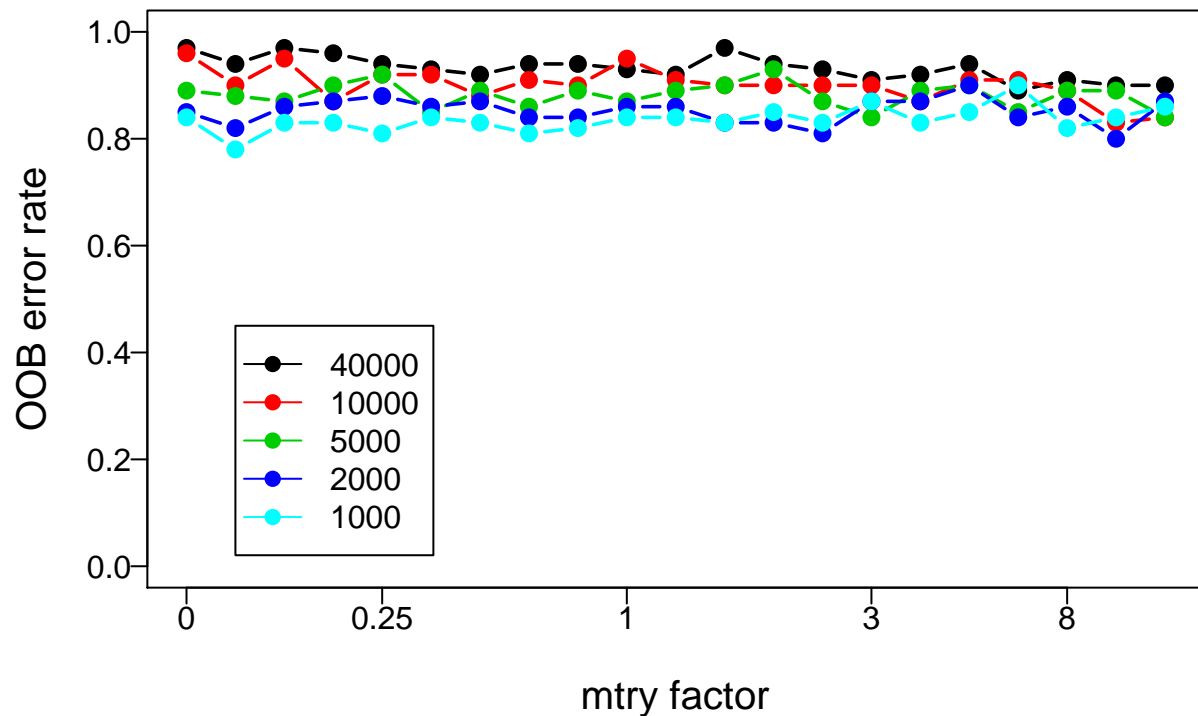

No signal: Classes 4 ; nodesize = 1

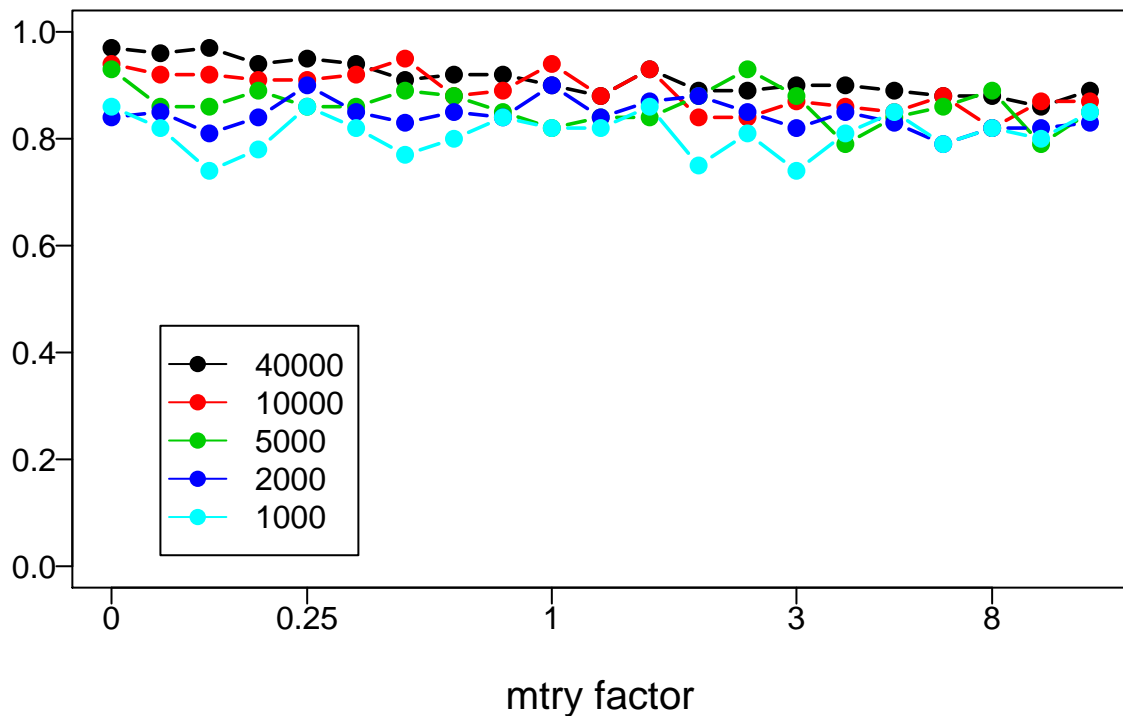

No signal: Classes 4 ; nodesize = 1

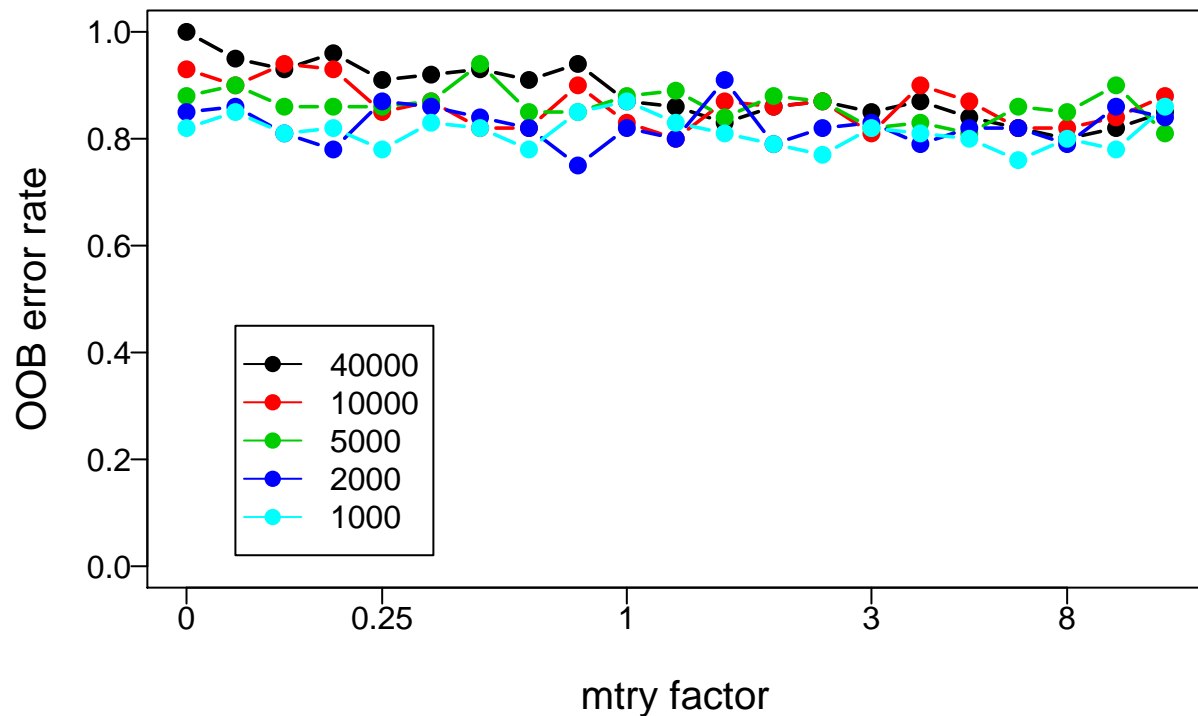

No signal: Classes 2 ; nodesize = 5

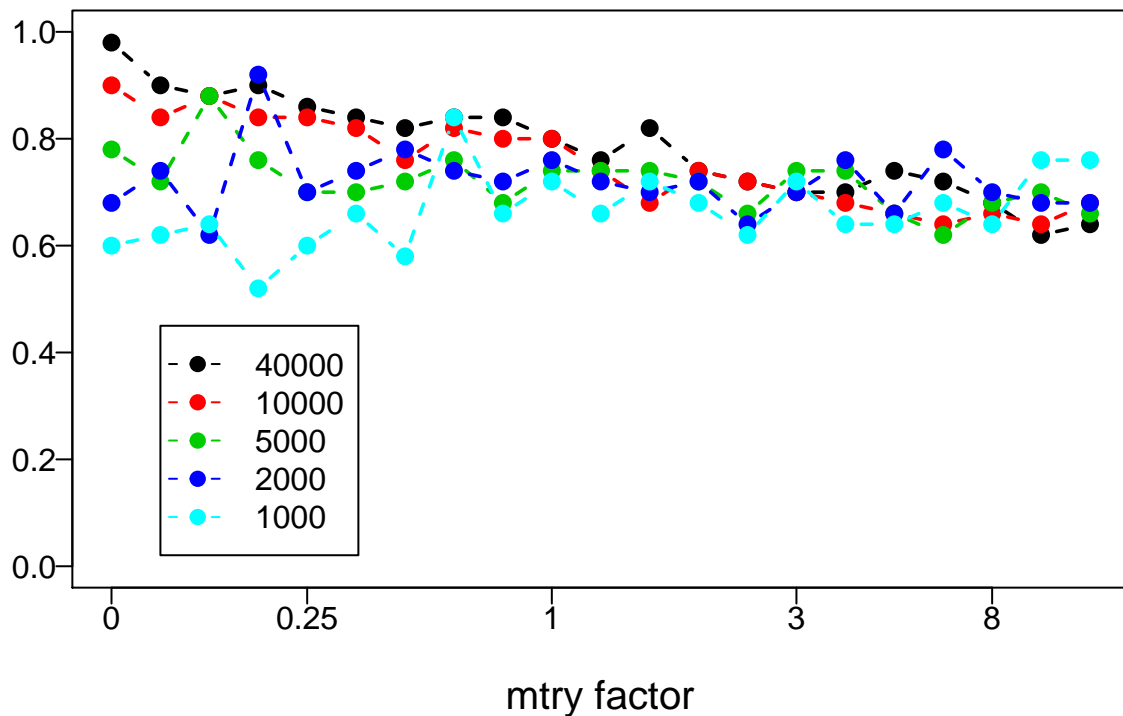

No signal: Classes 2 ; nodesize = 5

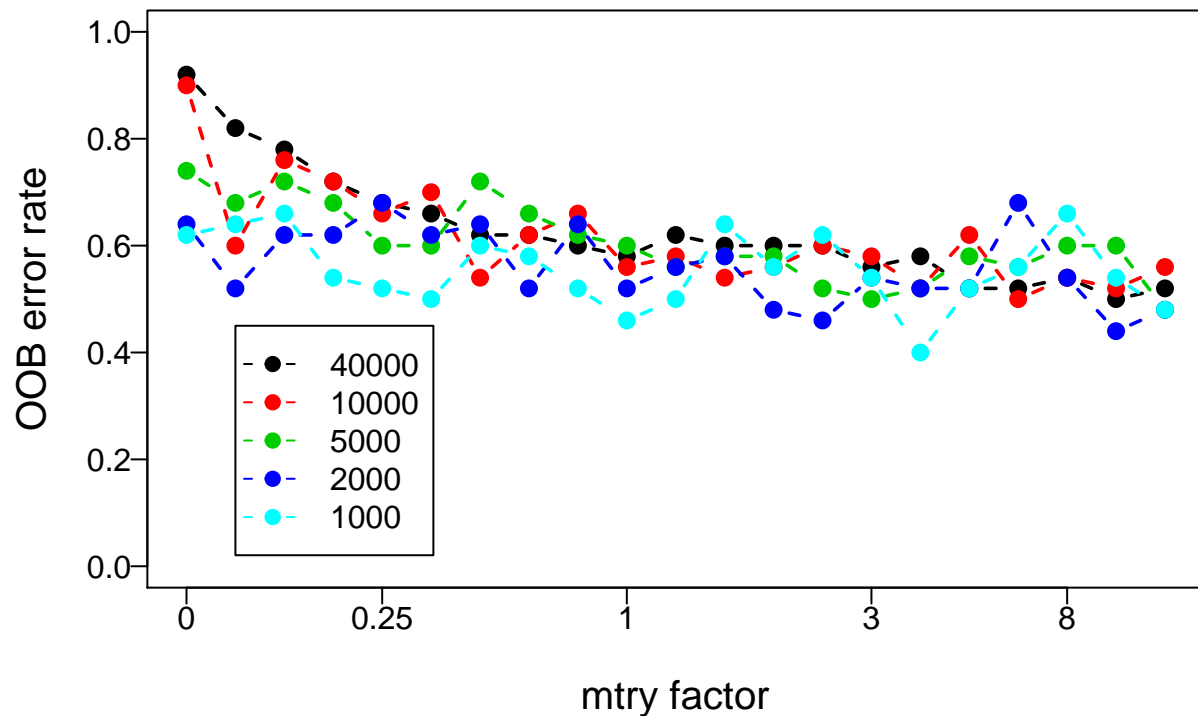

No signal: Classes 2 ; nodesize = 5

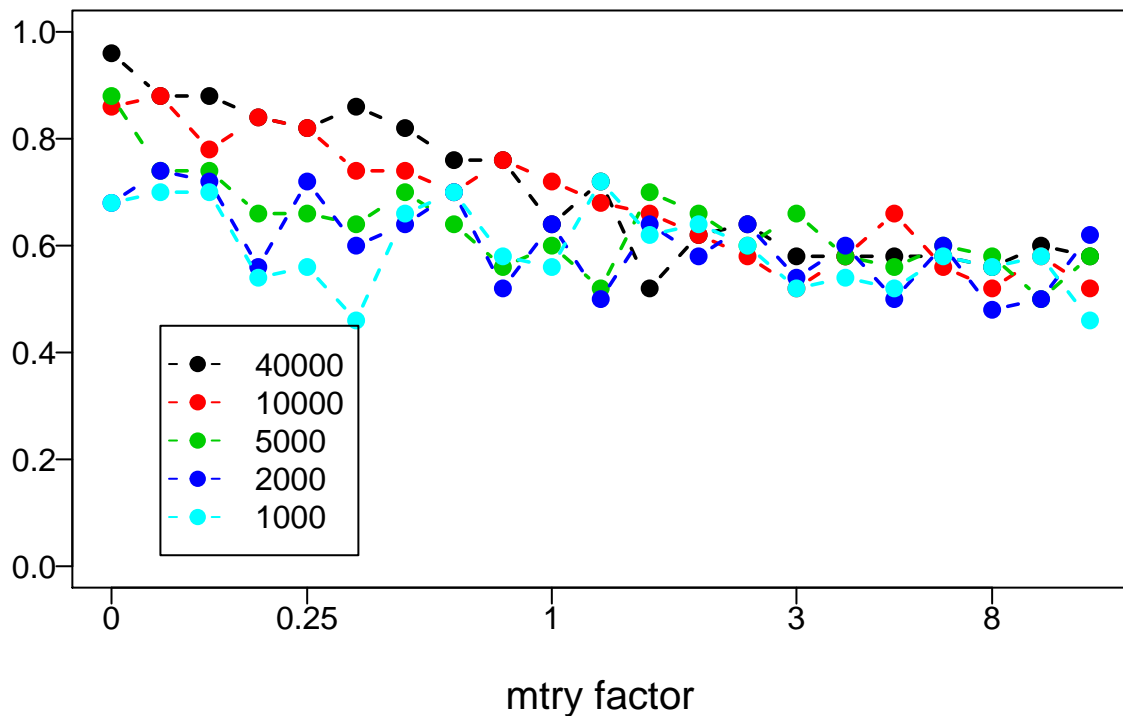

No signal: Classes 2 ; nodesize = 5

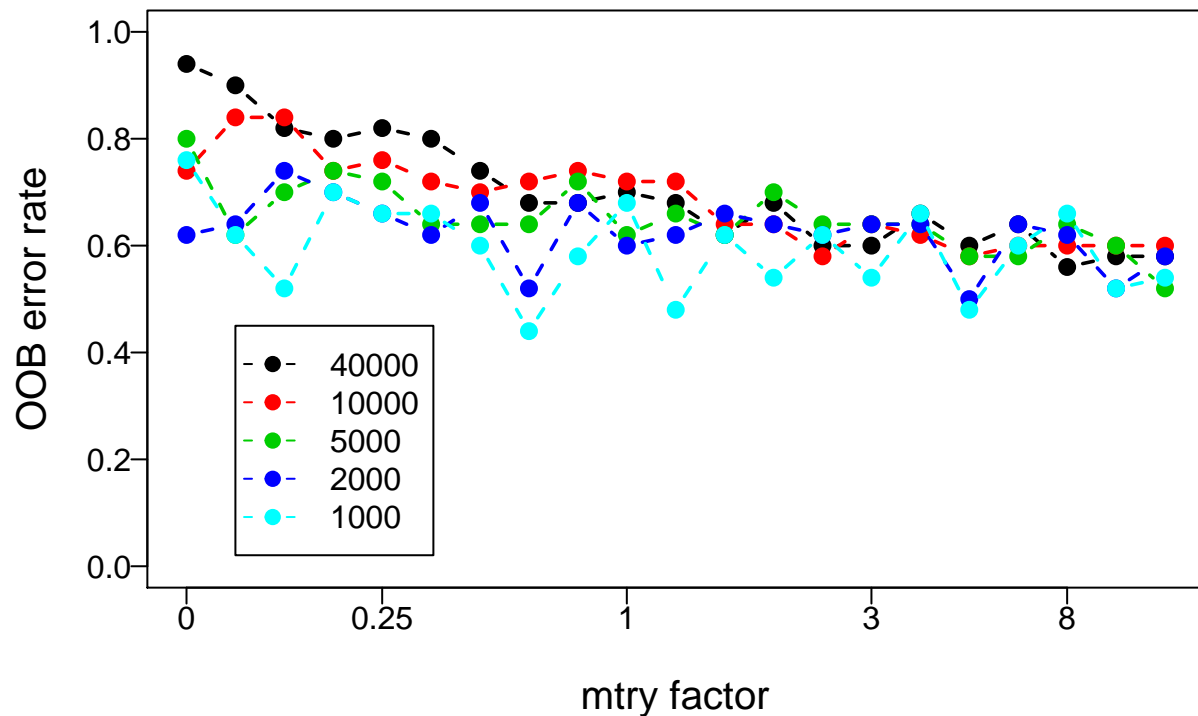

No signal: Classes 3 ; nodesize = 5

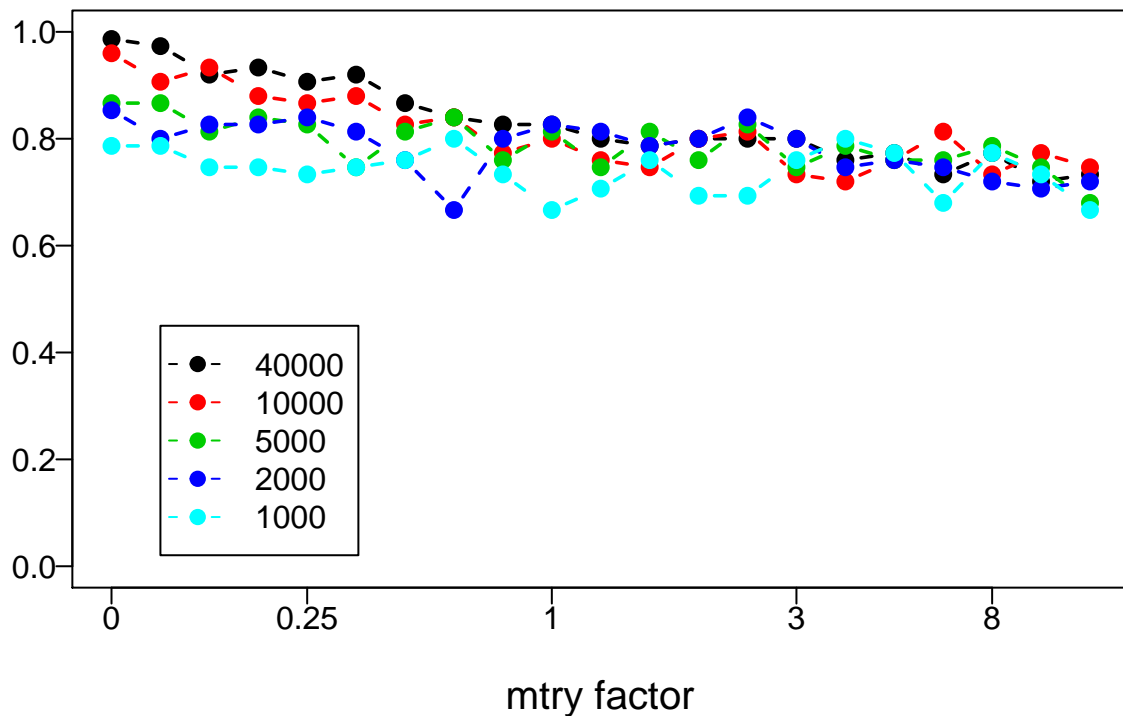

No signal: Classes 3 ; nodesize = 5

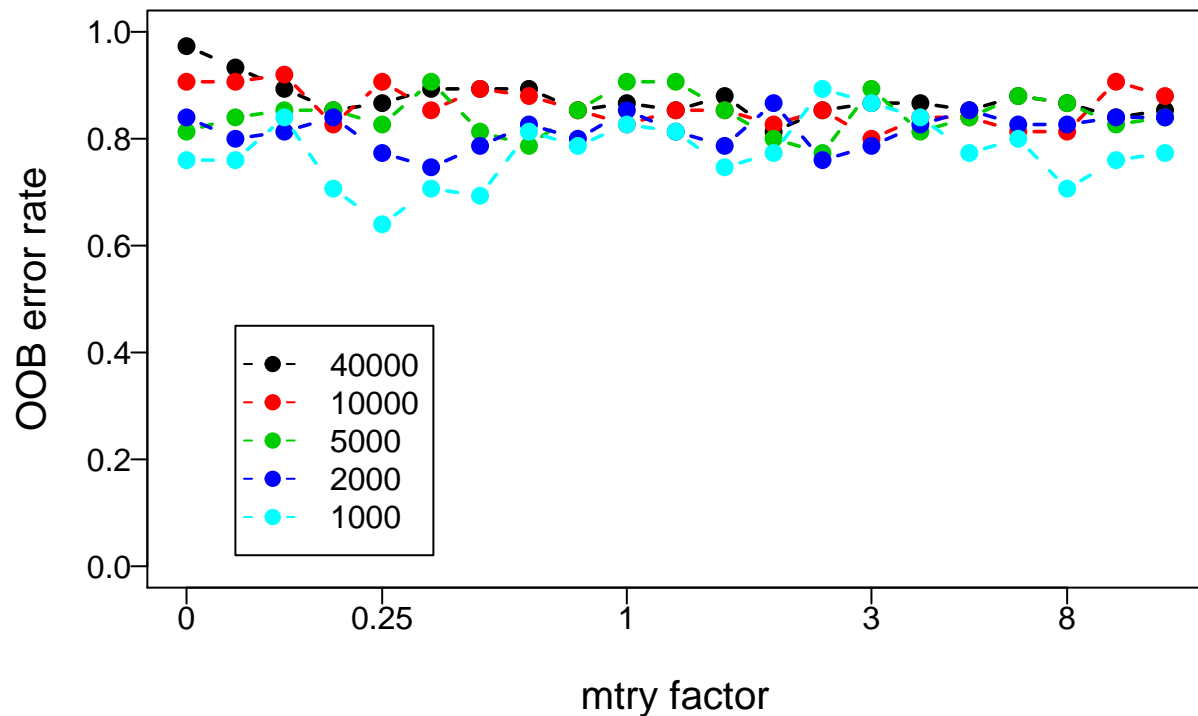

No signal: Classes 3 ; nodesize = 5

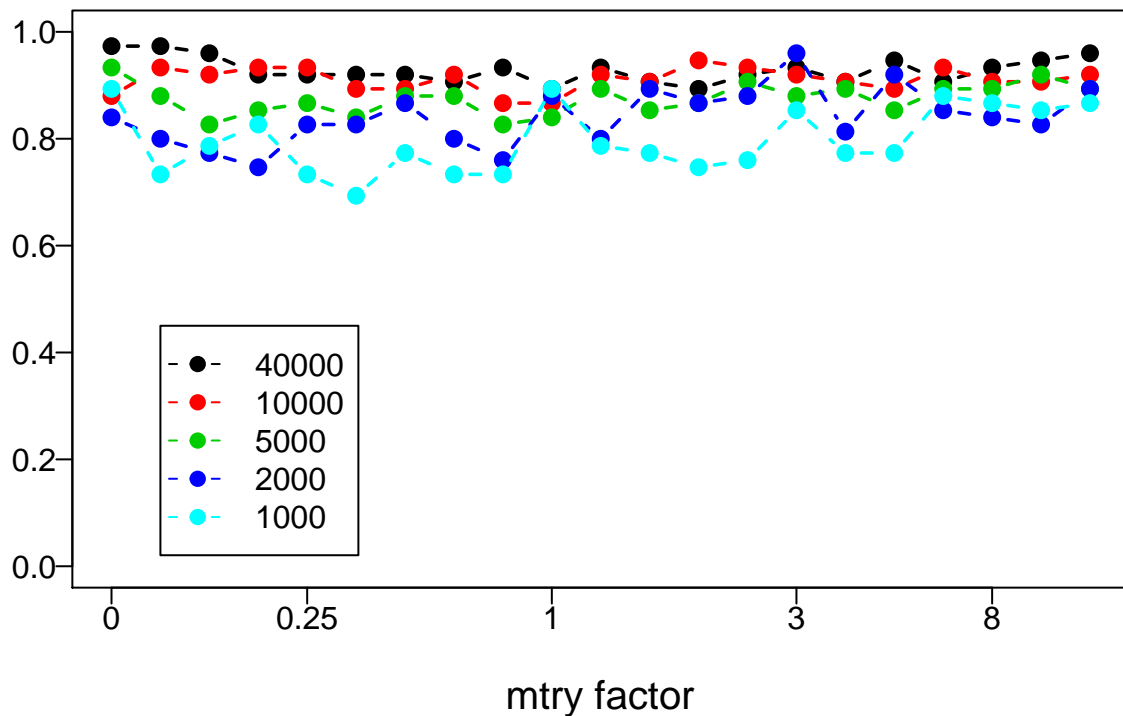

No signal: Classes 3 ; nodesize = 5

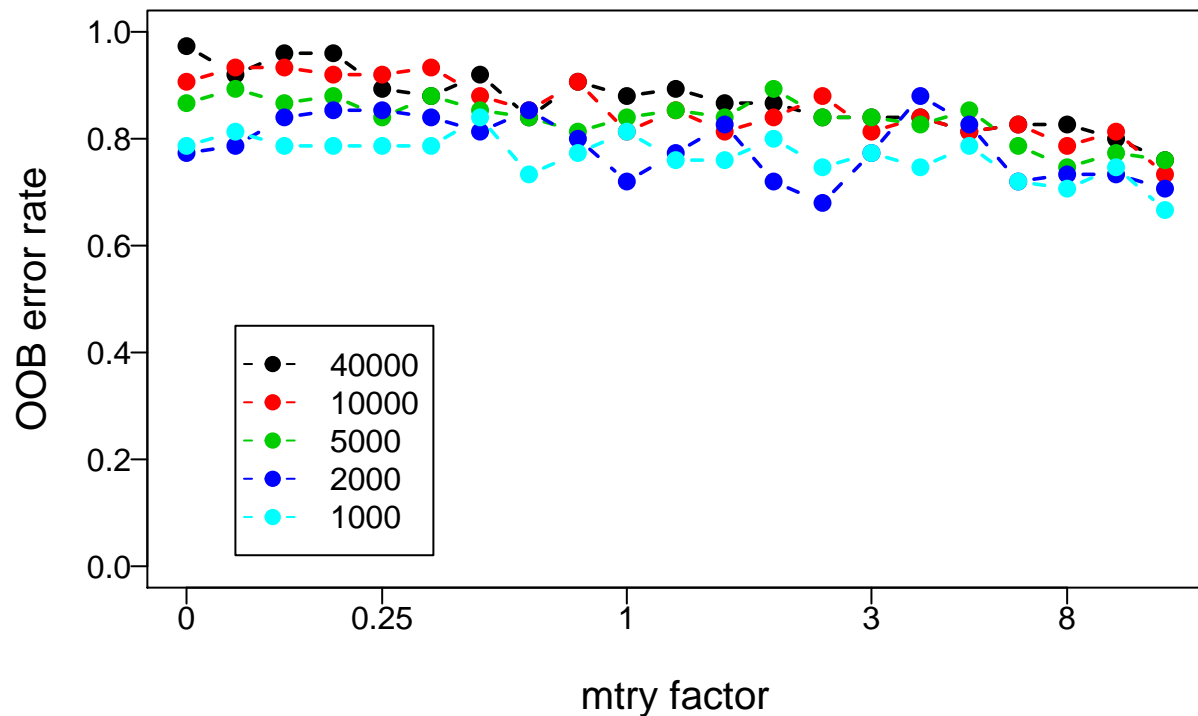

No signal: Classes 4 ; nodesize = 5

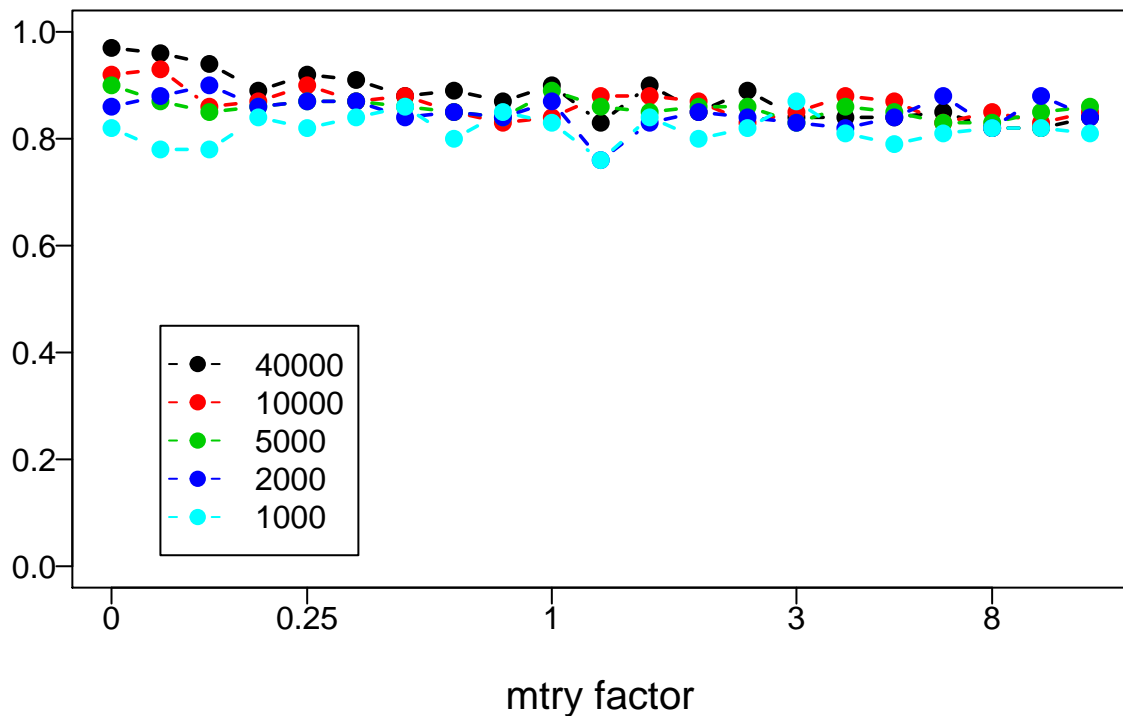

No signal: Classes 4 ; nodesize = 5

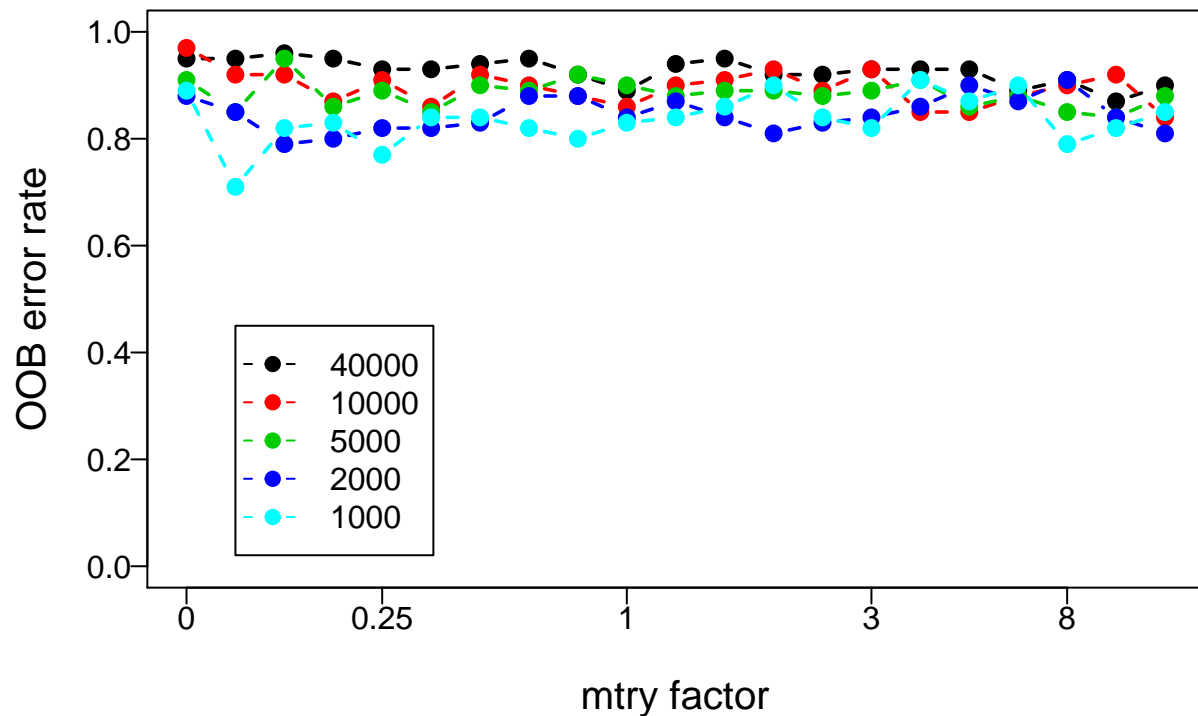

No signal: Classes 4 ; nodesize = 5

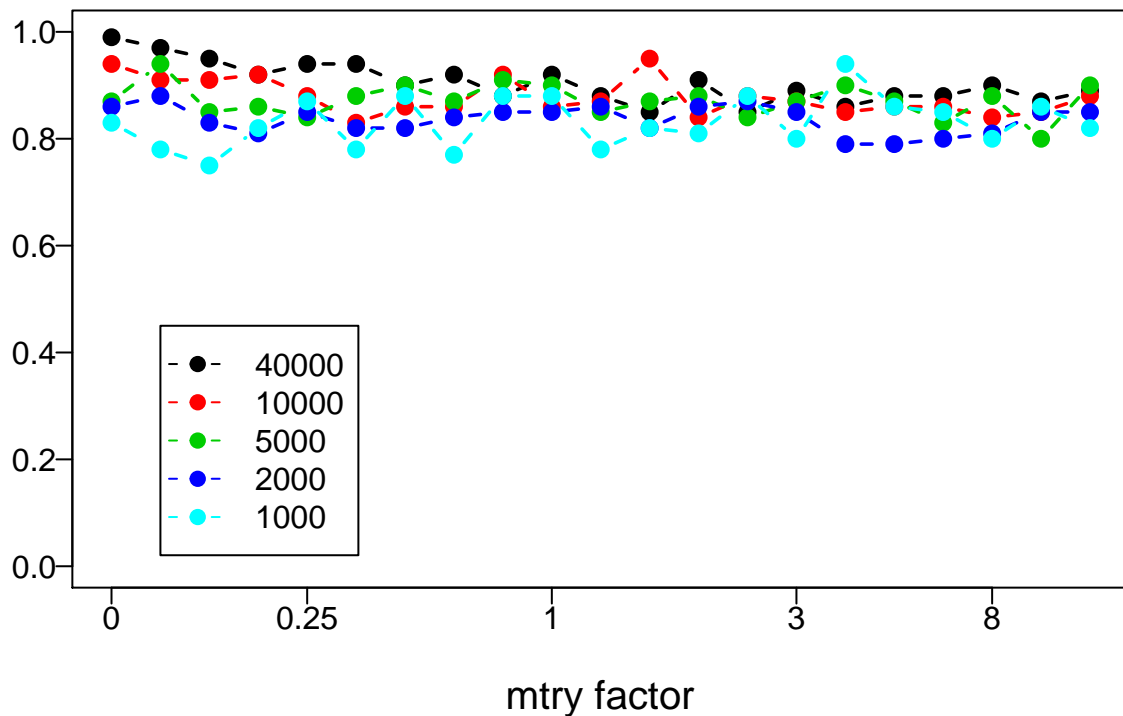

No signal: Classes 4 ; nodesize = 5

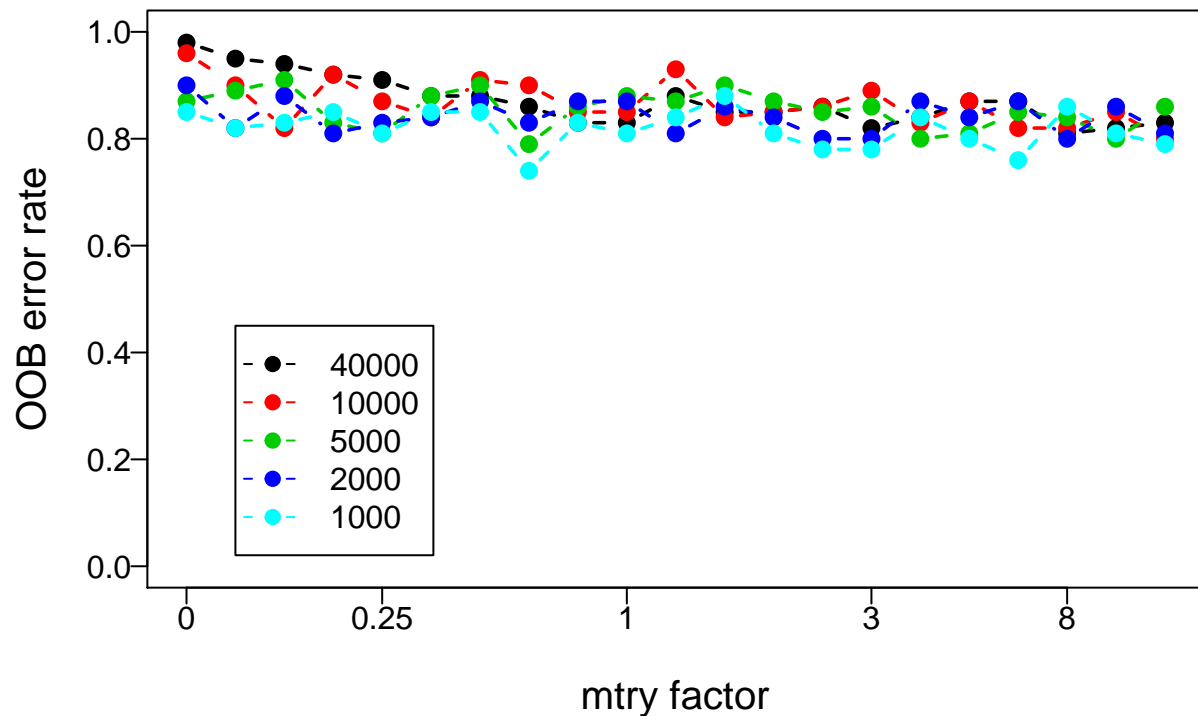

### III: Real microarray data sets:

(left: nodesize = 1, right: nodesize = 5)

Leukemia; nodesize = 1

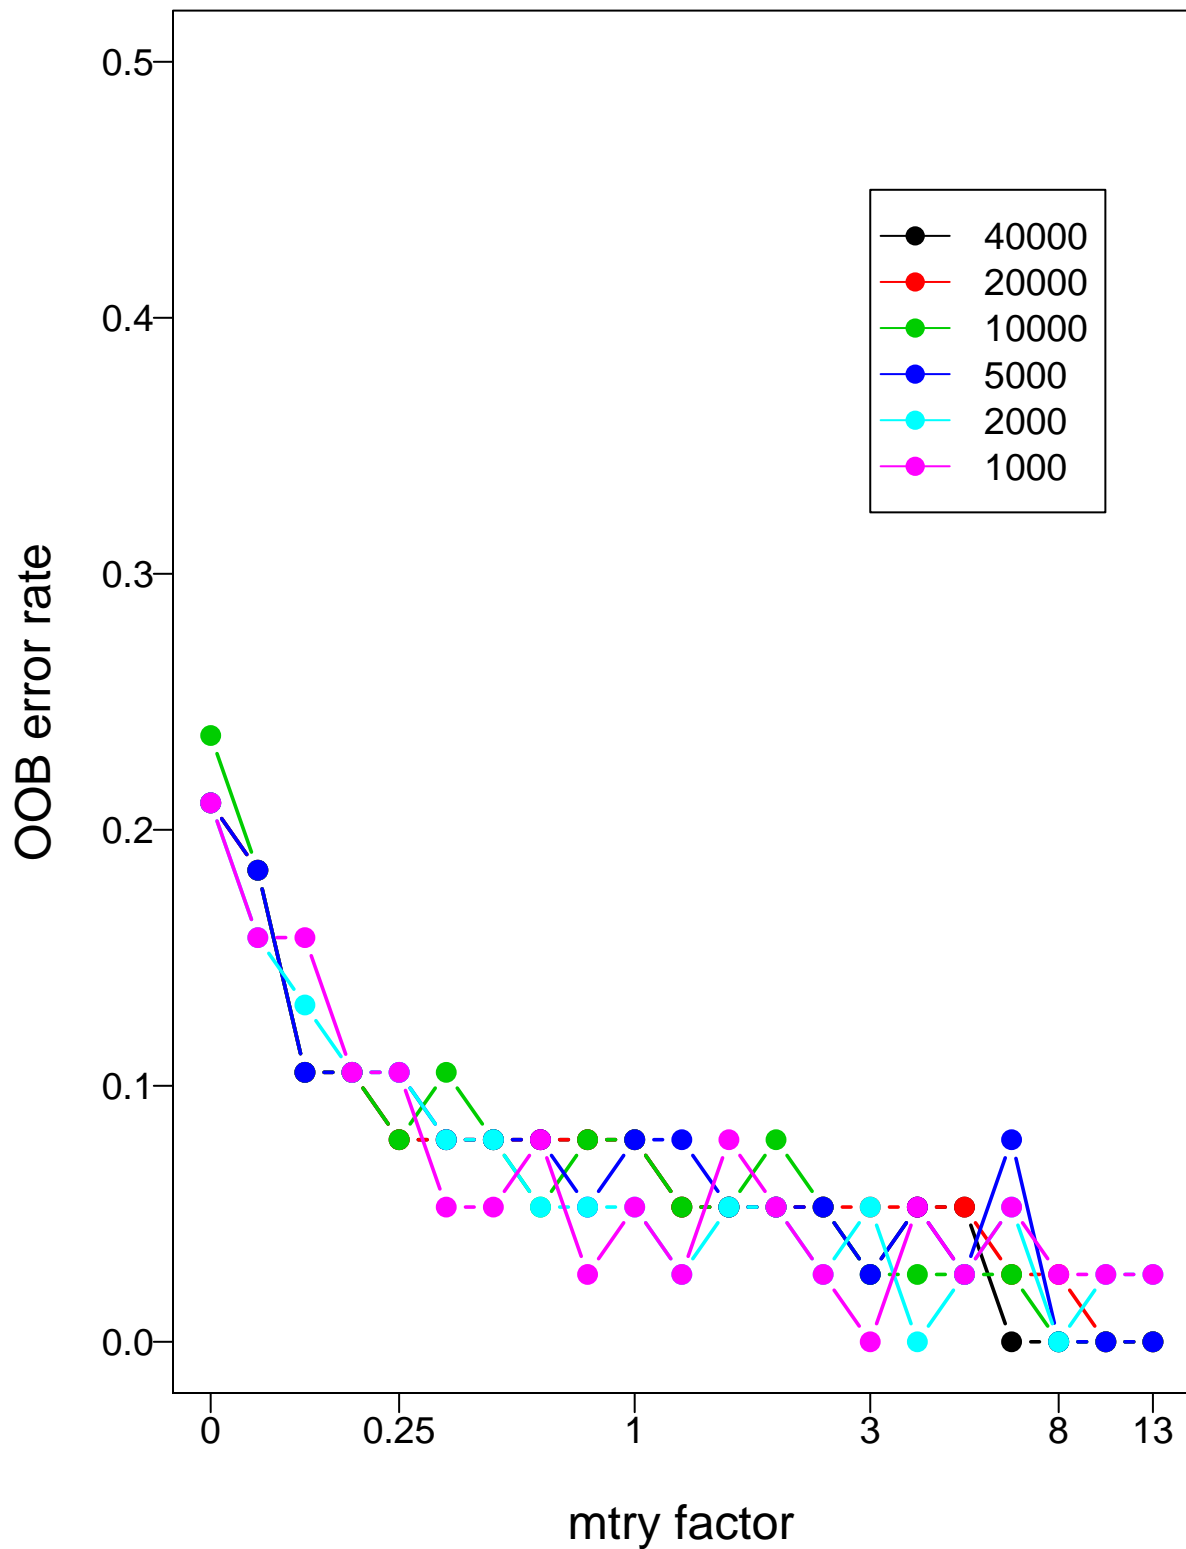

Leukemia; nodesize = 5

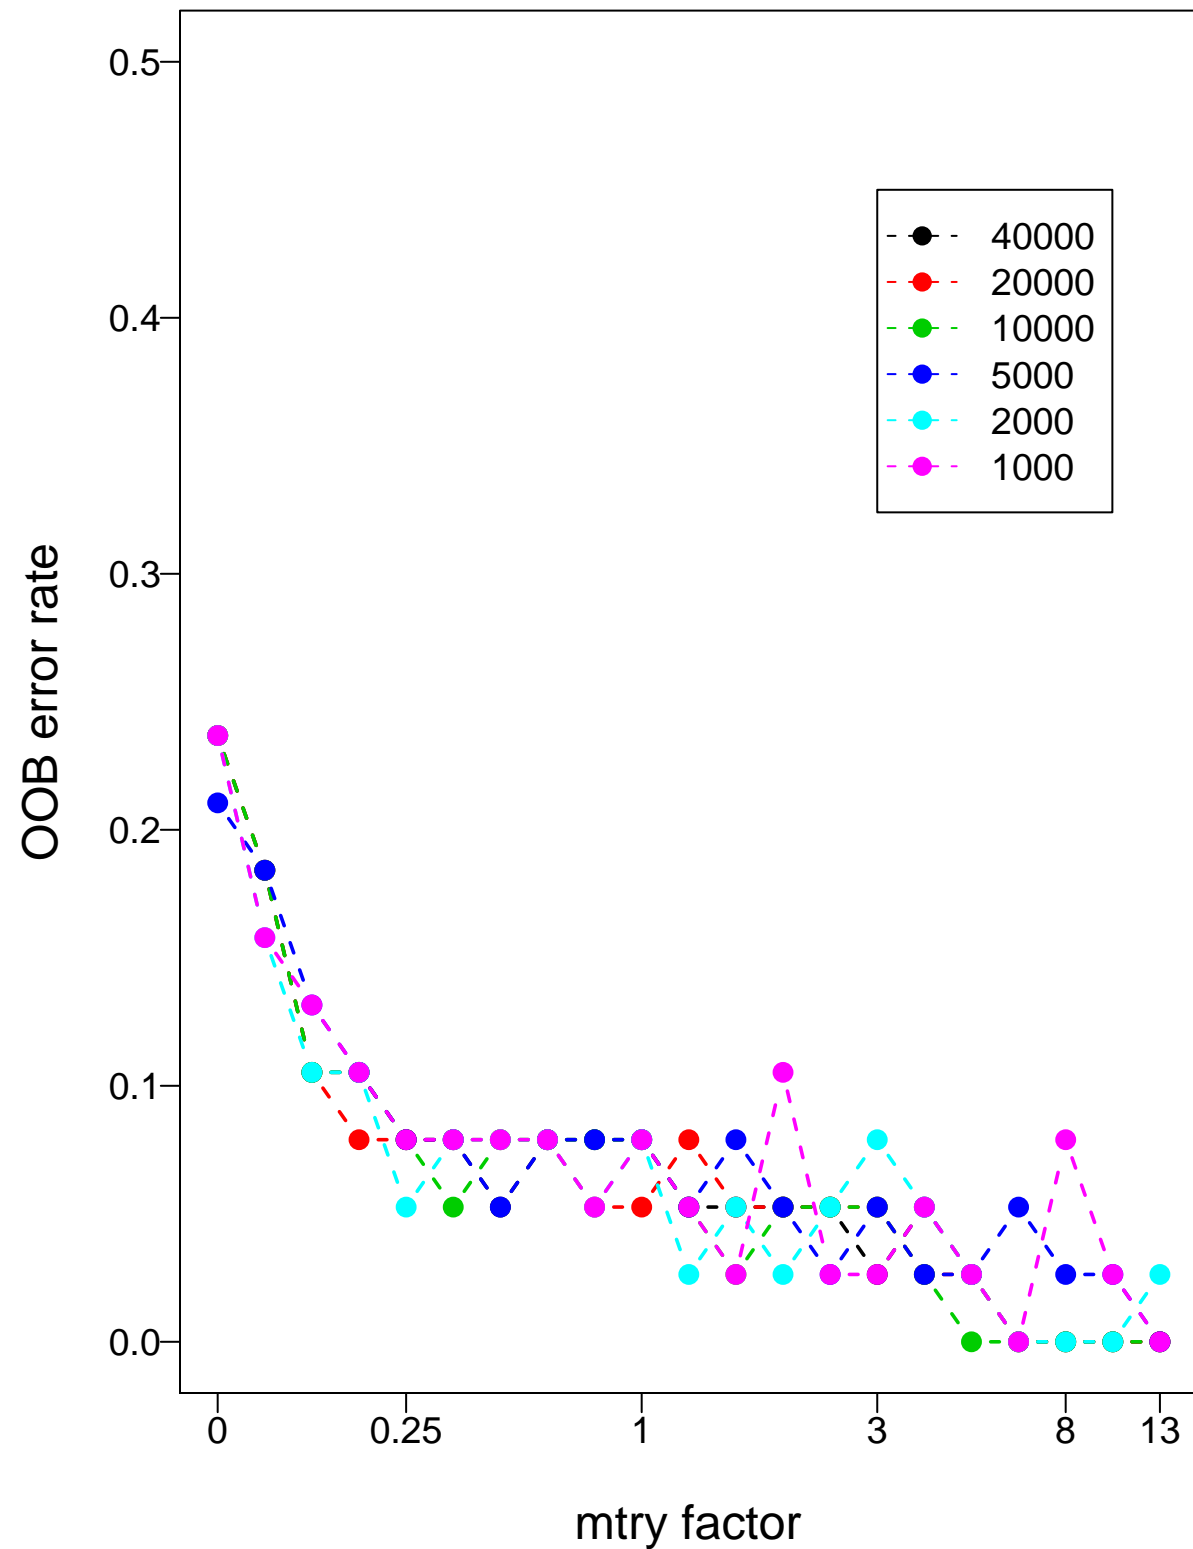



Adenoc.; nodesize = 1

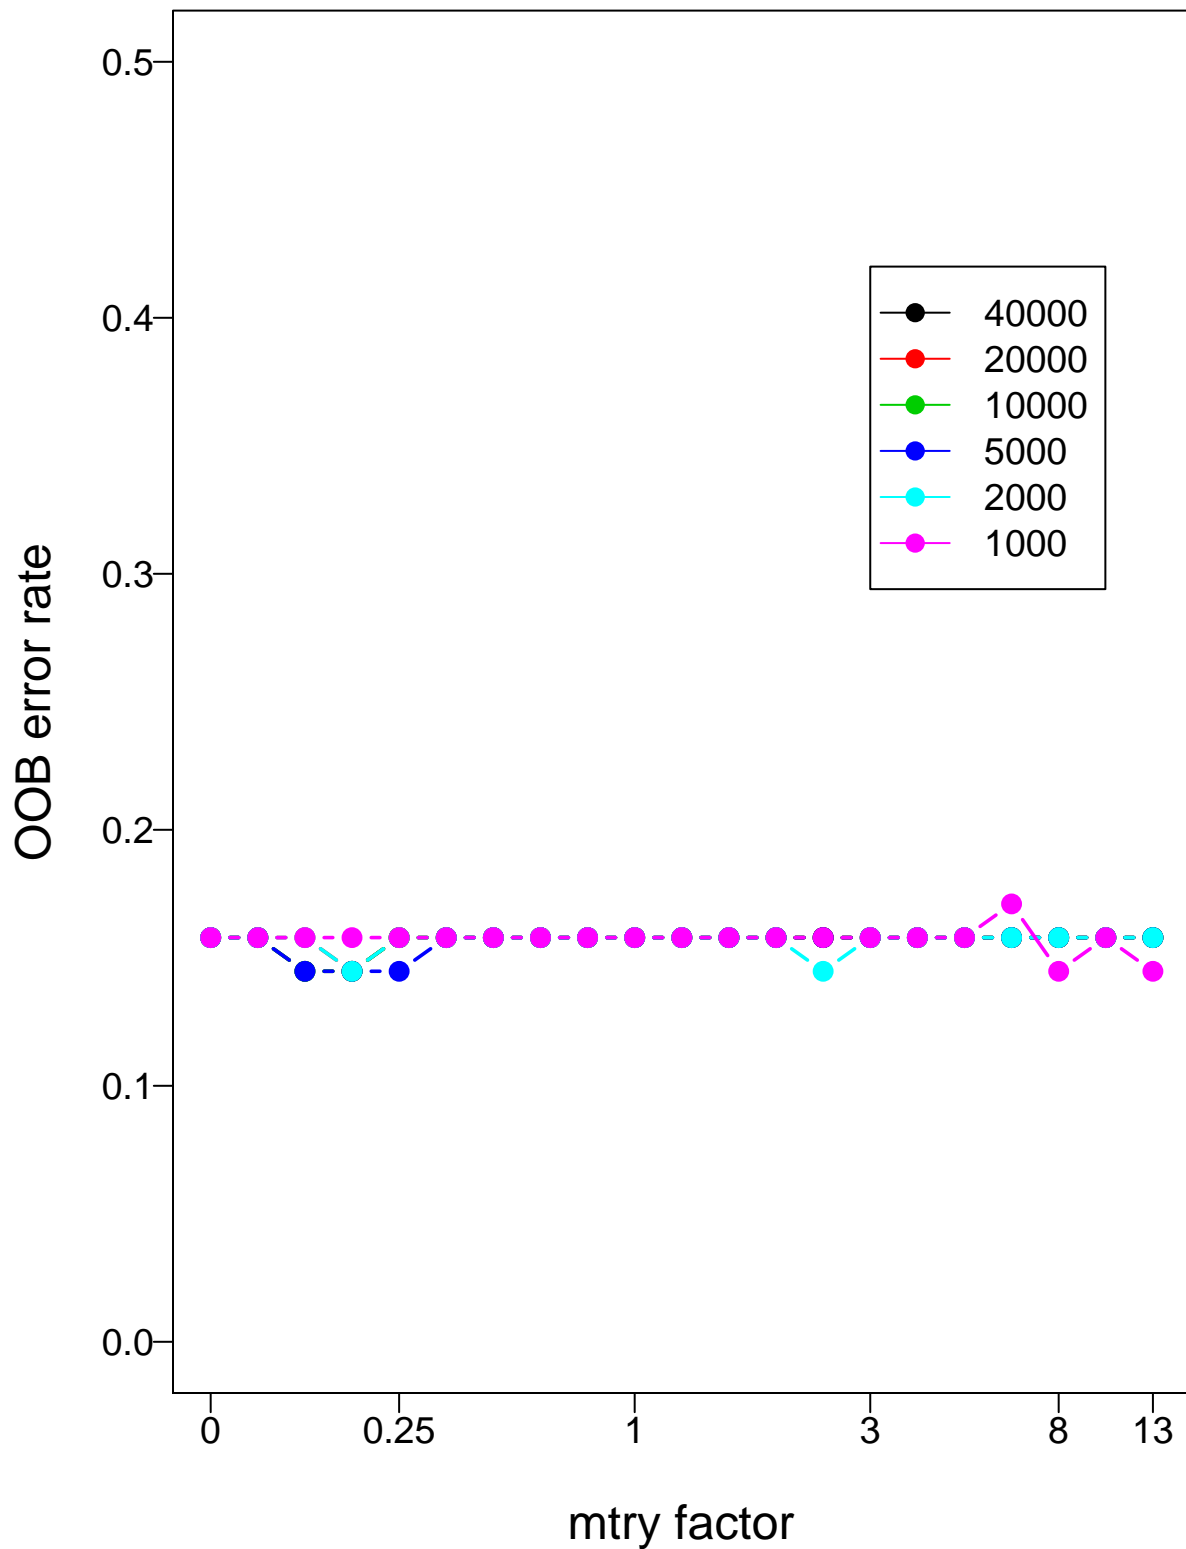

Adenoc.; nodesize = 5

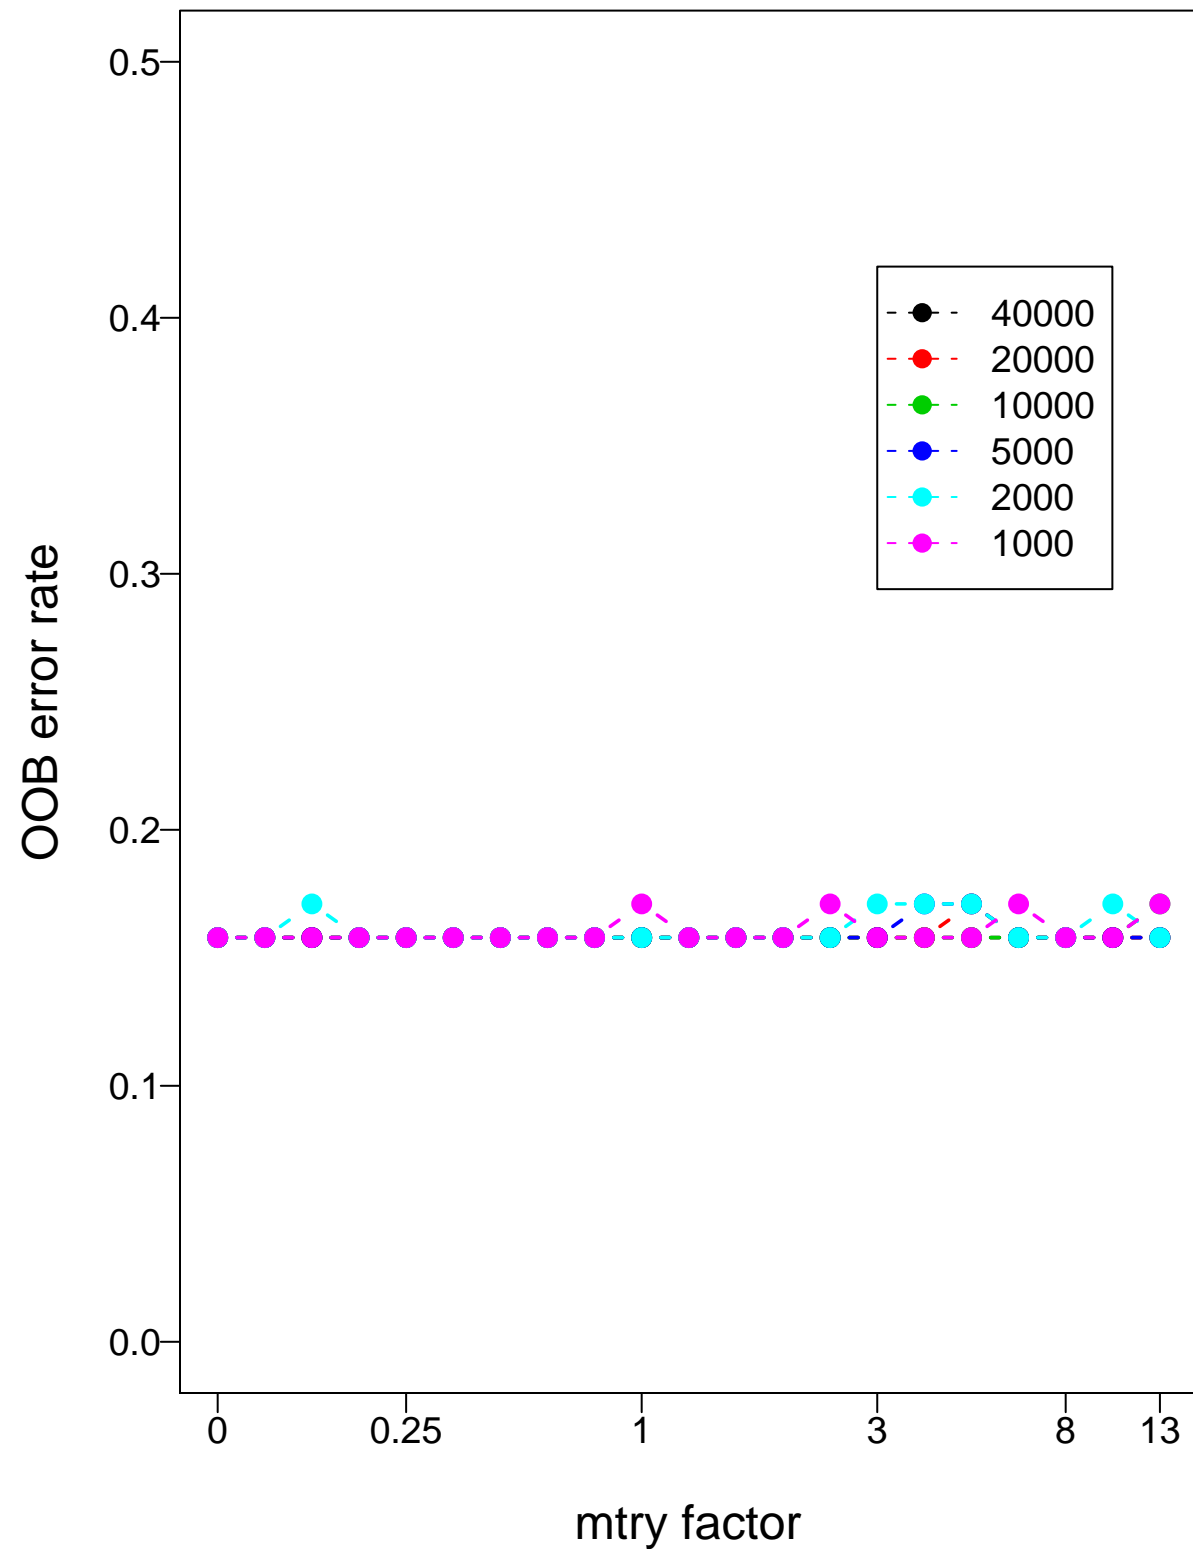

Breast, 2 cl.; nodesize = 1

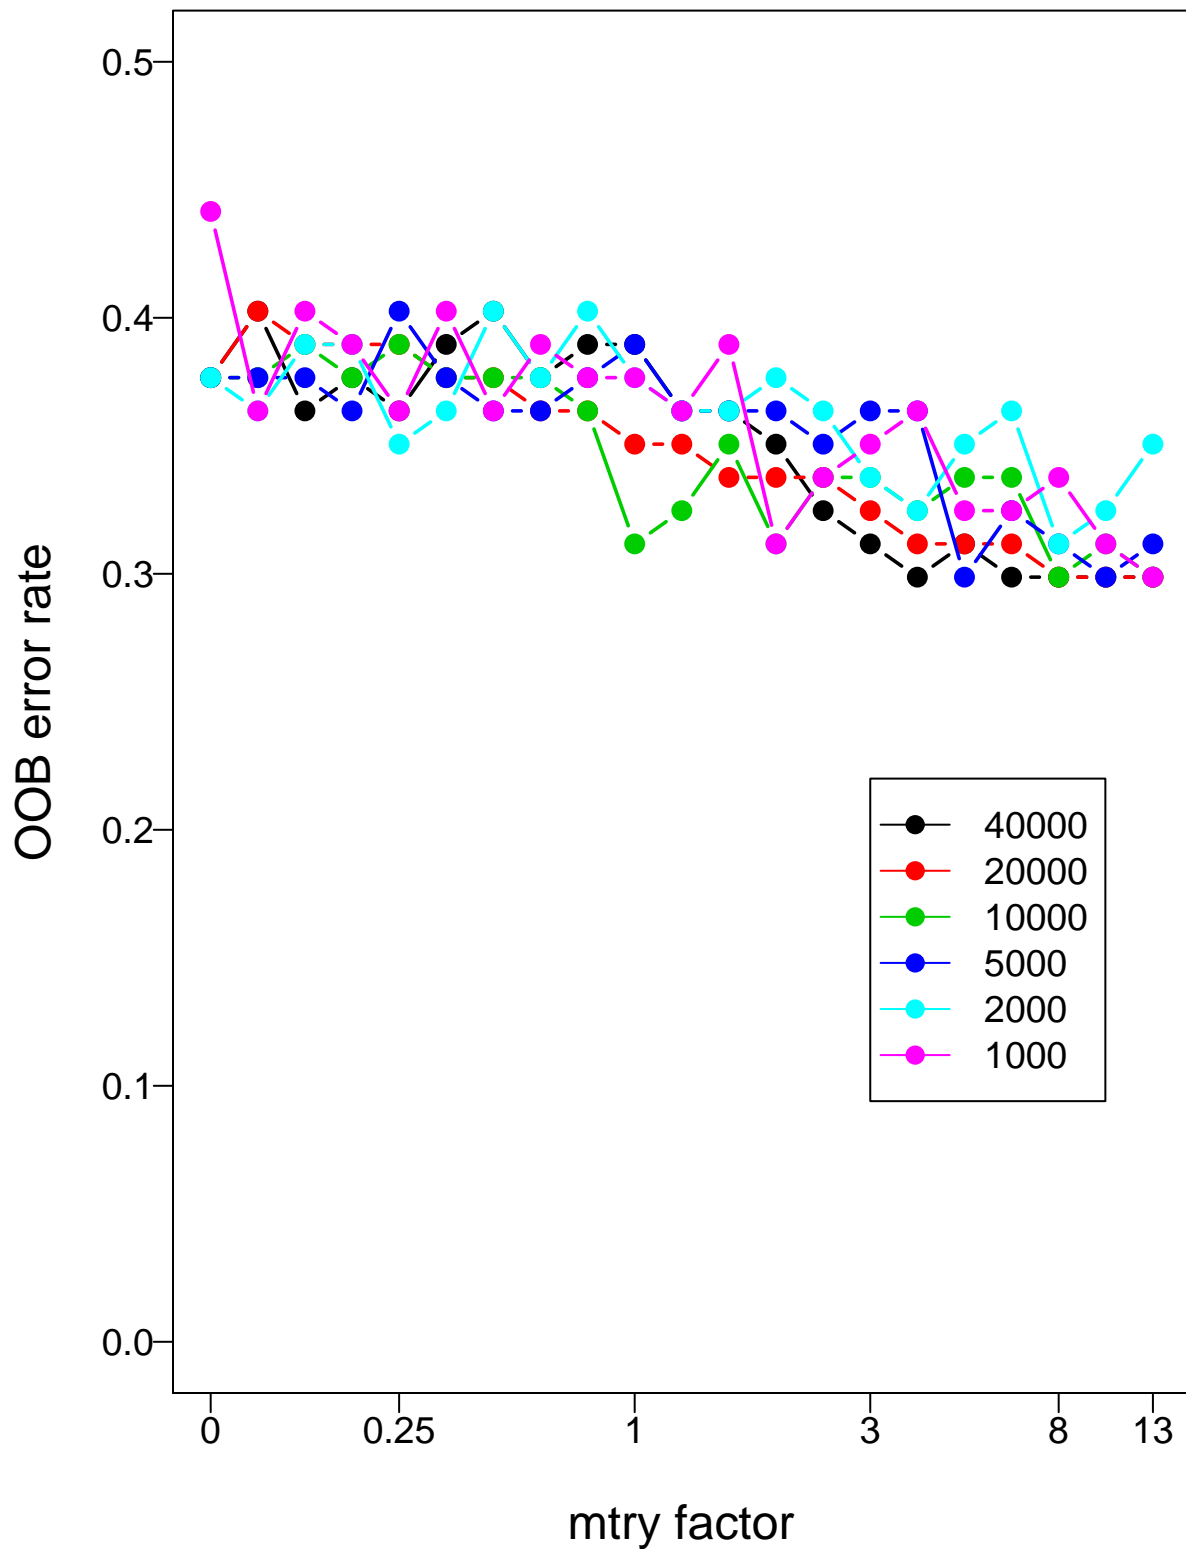

Breast, 2 cl.; nodesize = 5

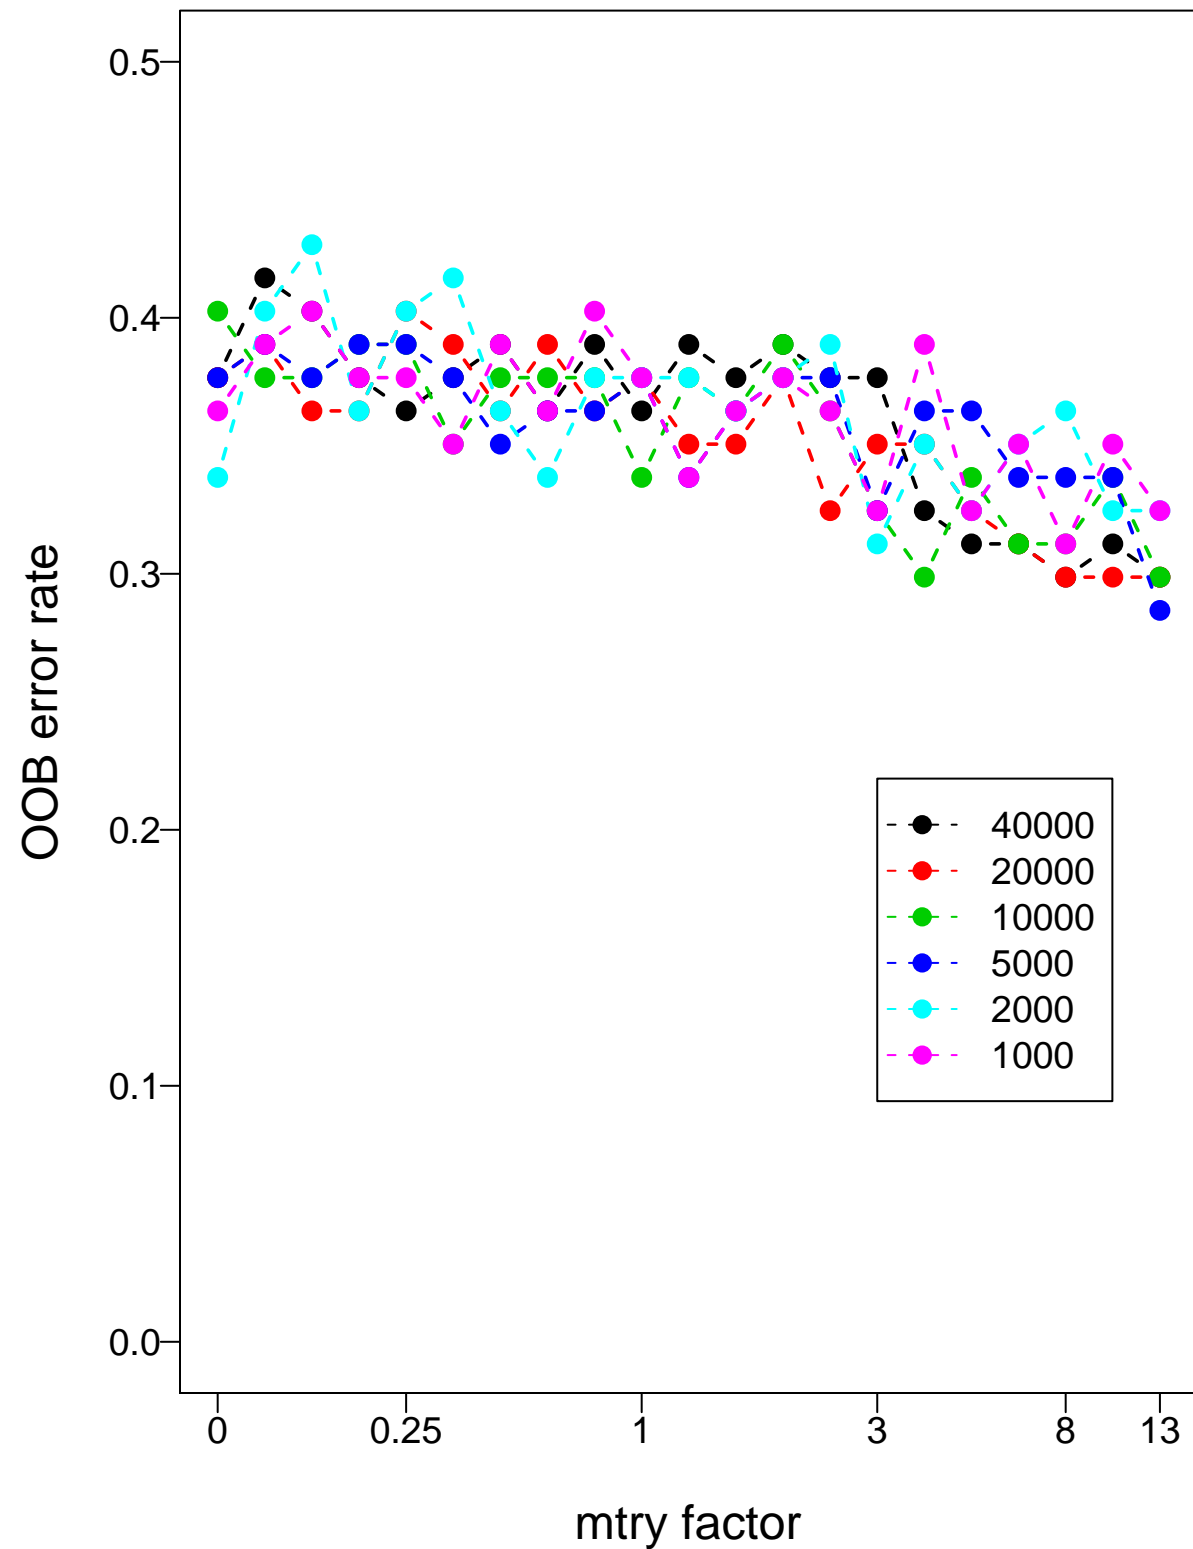

Breast, 3 cl.; nodesize = 1

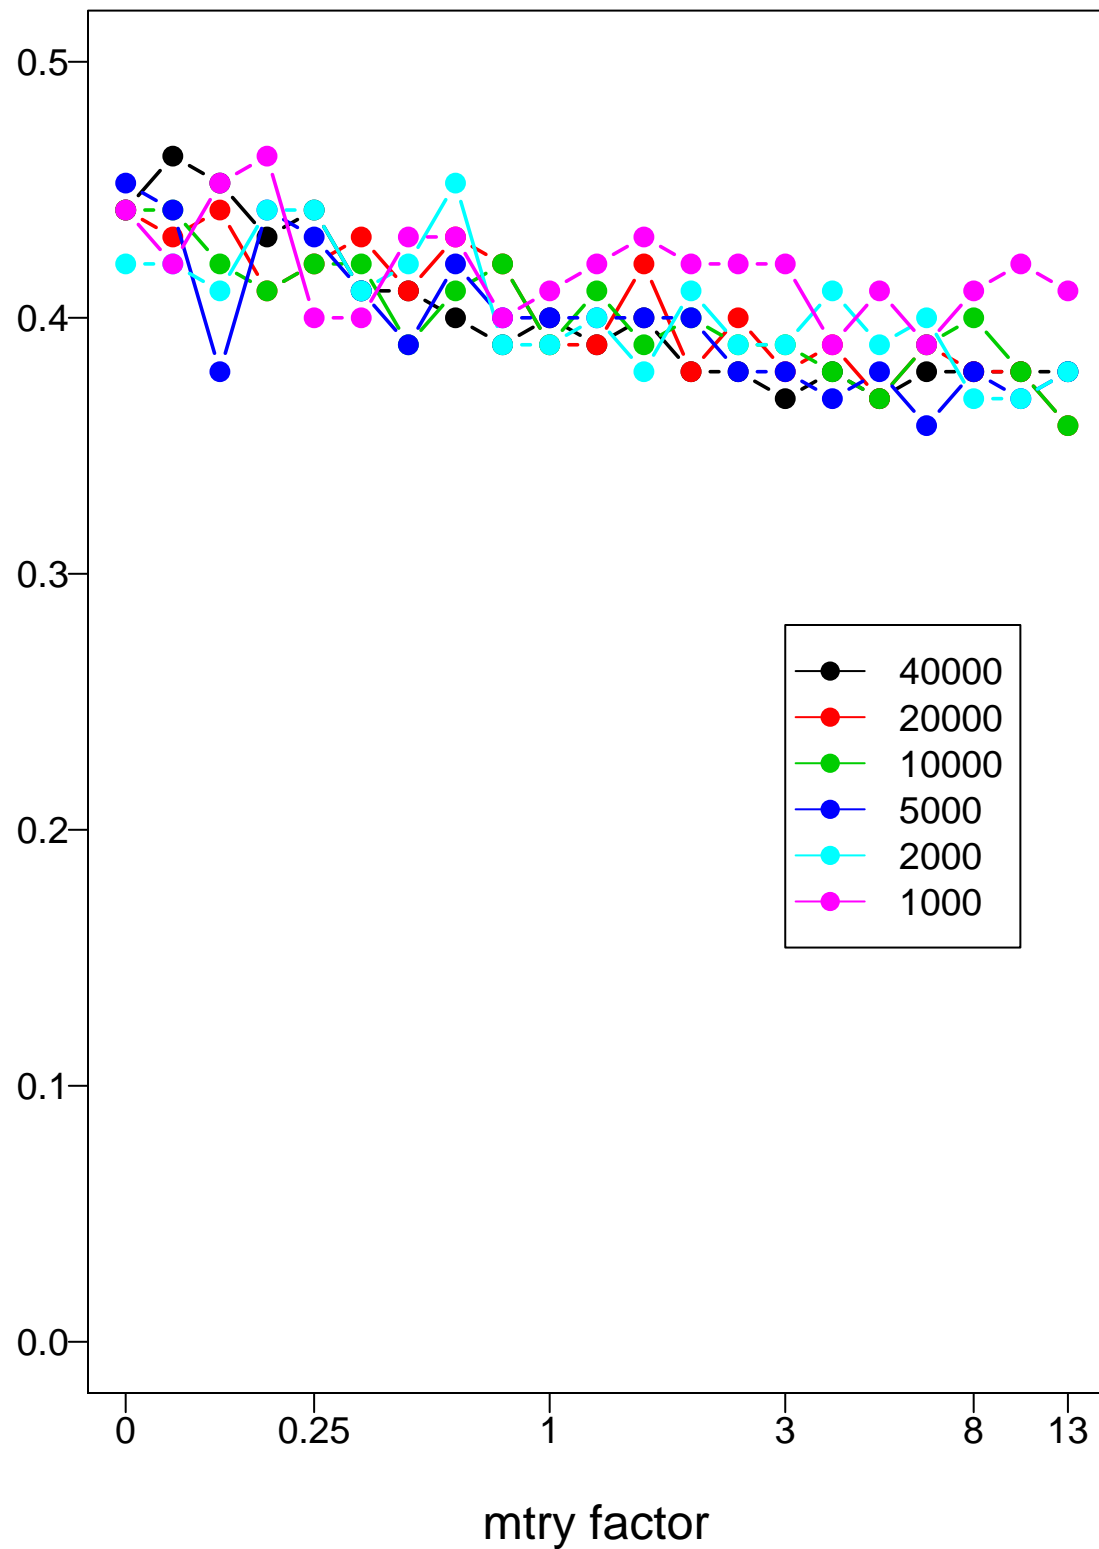

Breast, 3 cl.; nodesize = 5

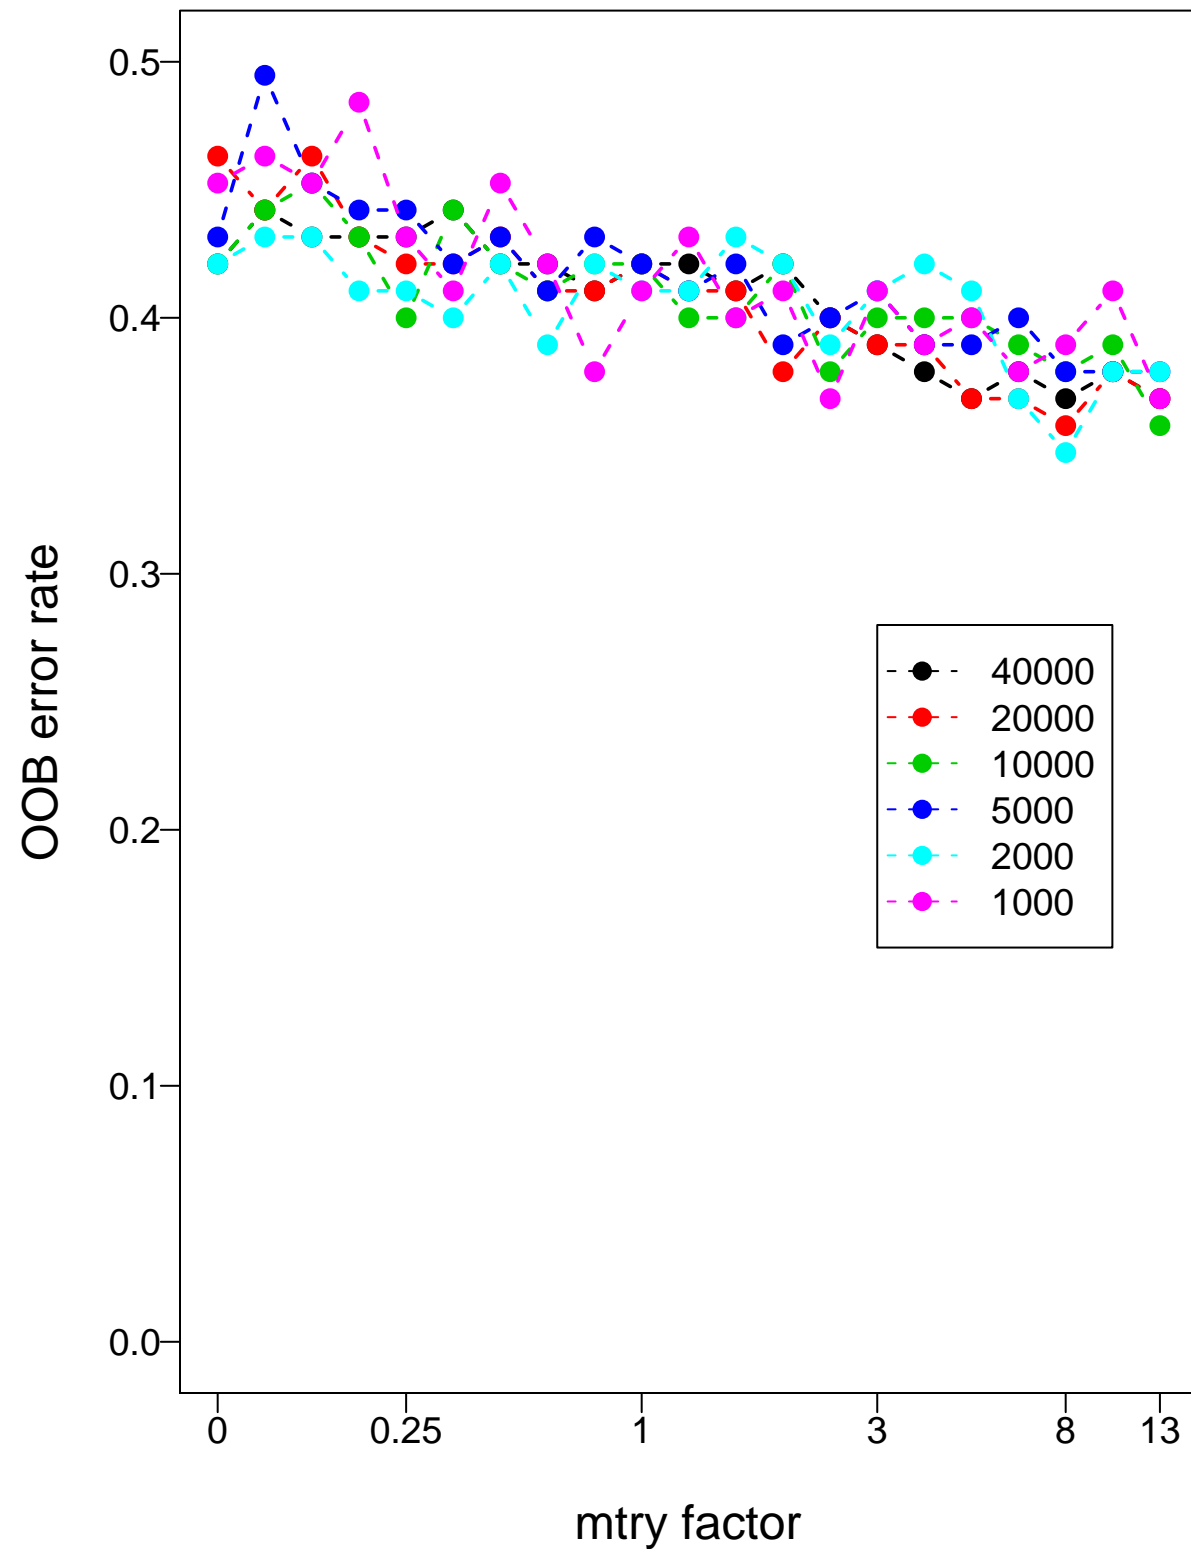

NCI 60; nodesize = 1

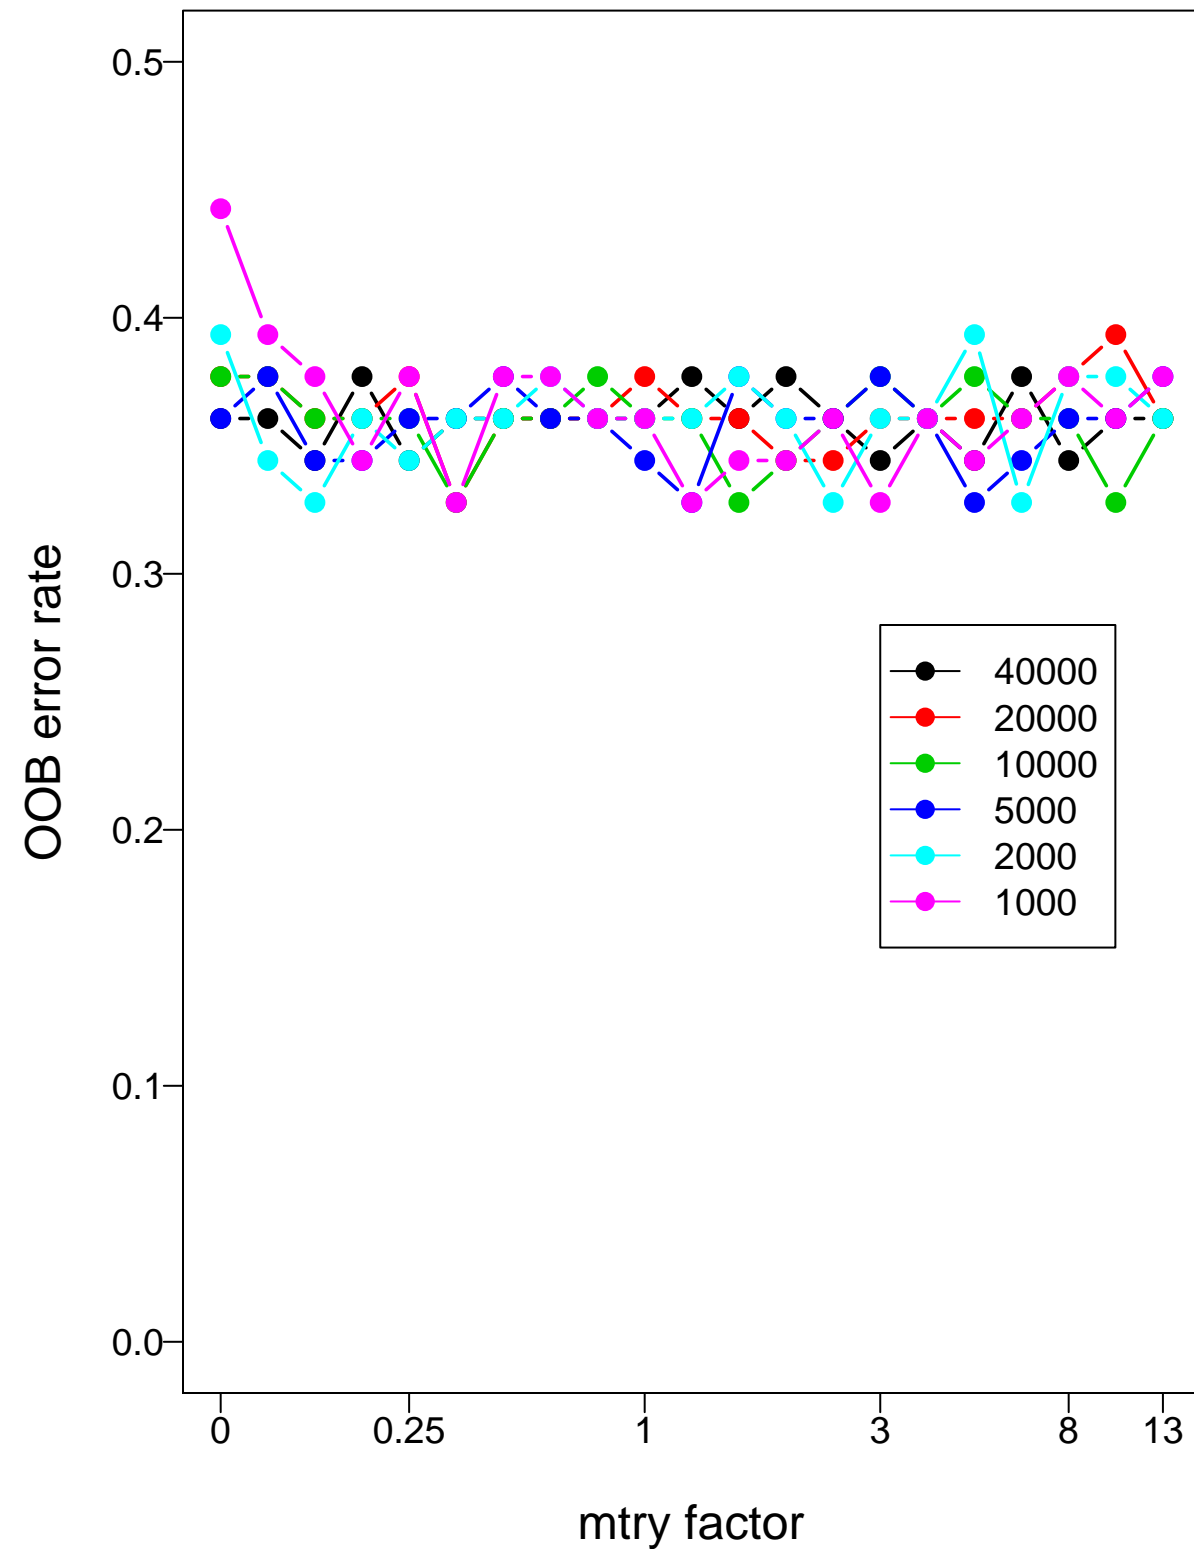

NCI 60; nodesize = 5

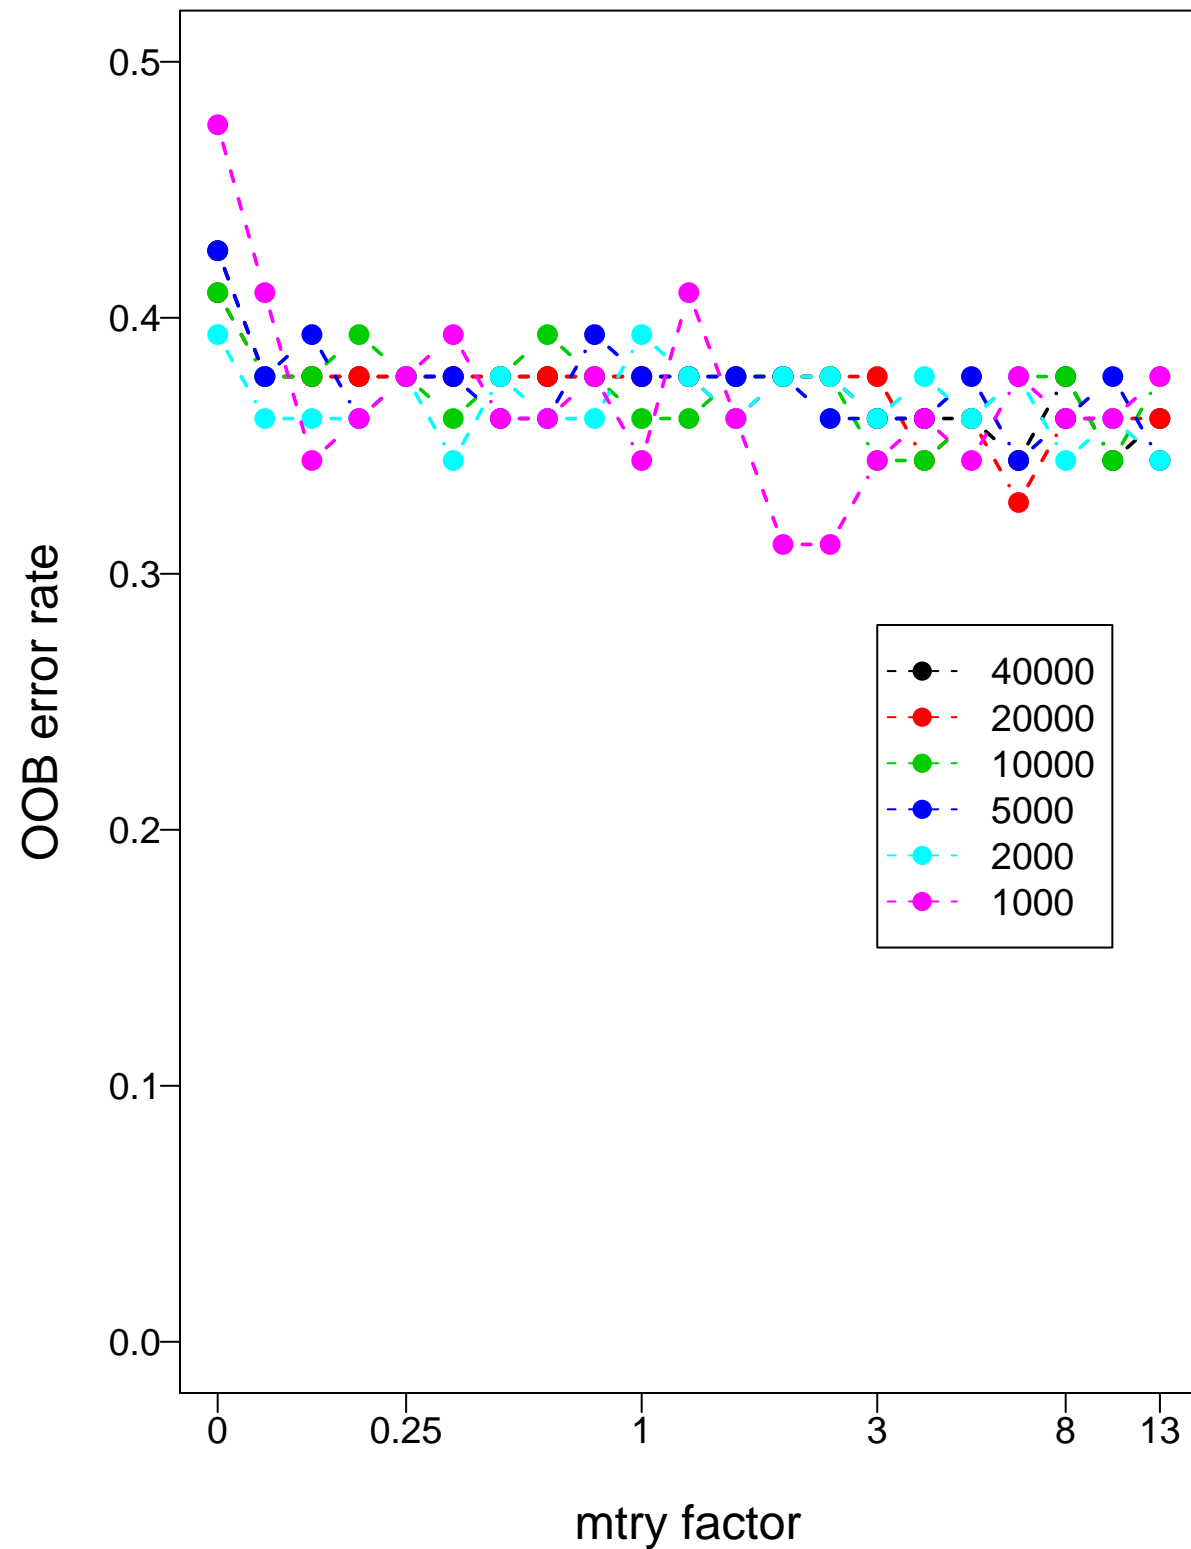

Brain; nodesize = 1

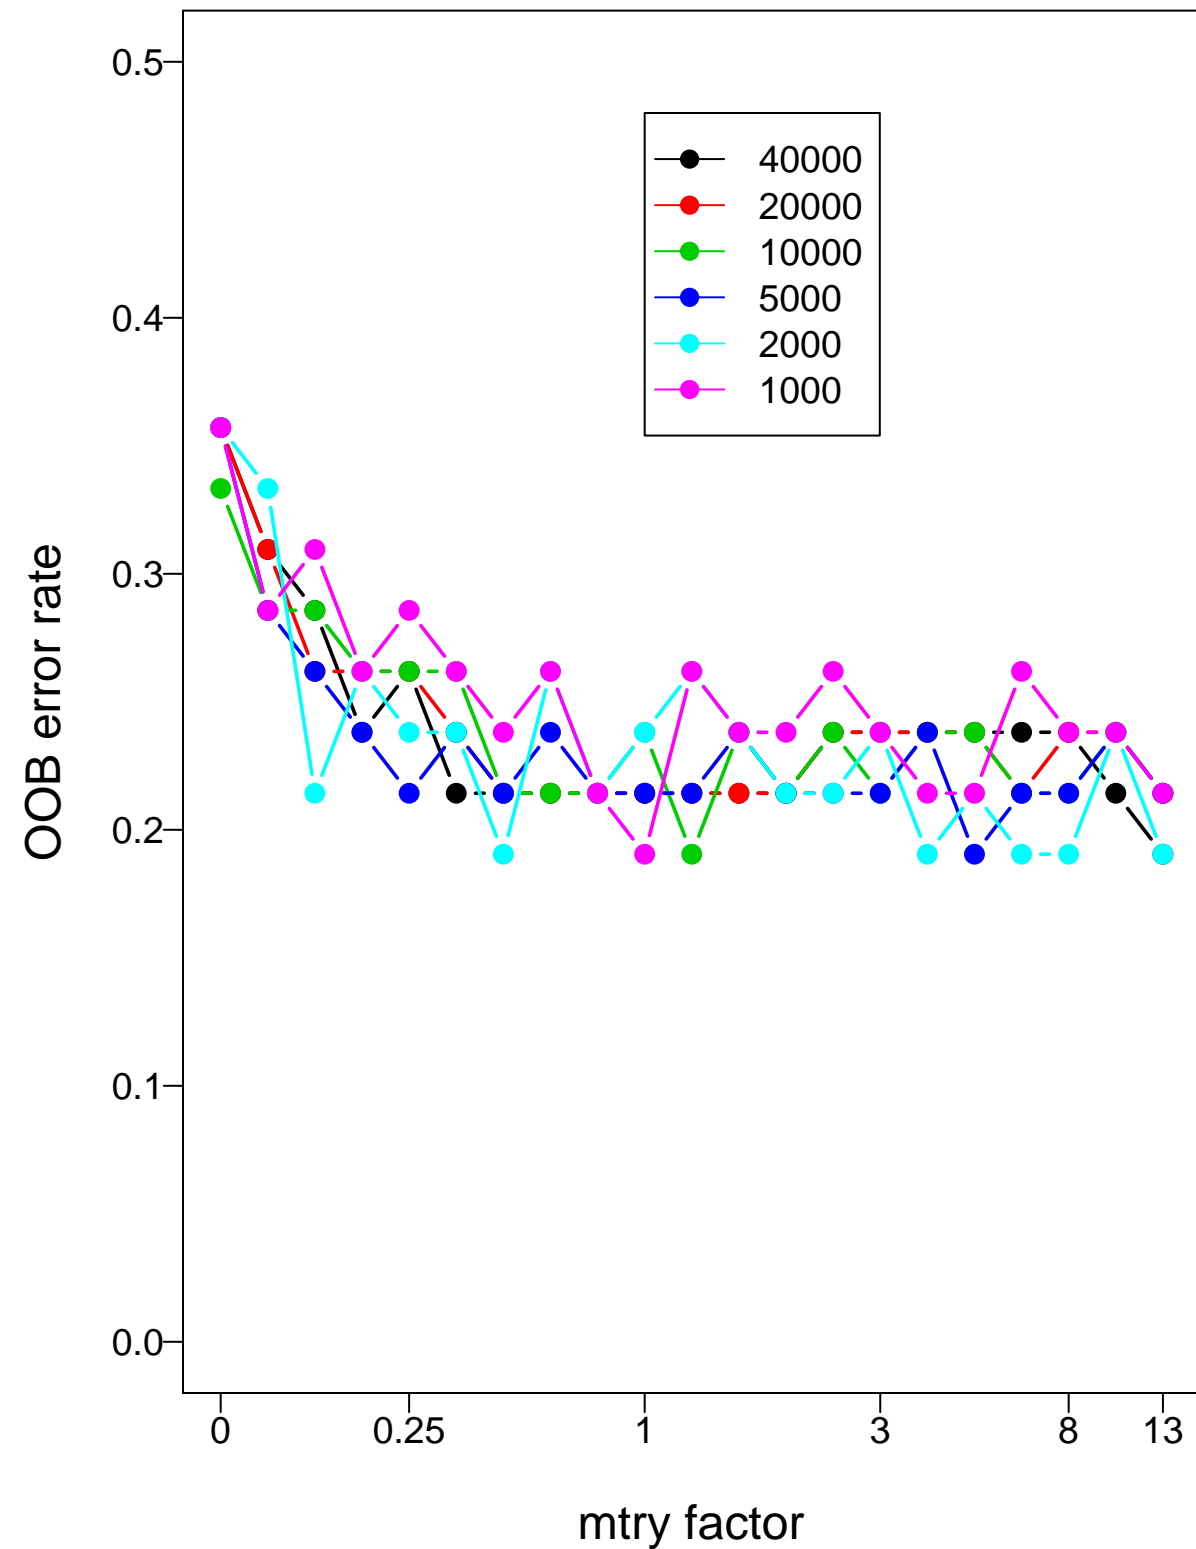

Brain; nodesize = 5

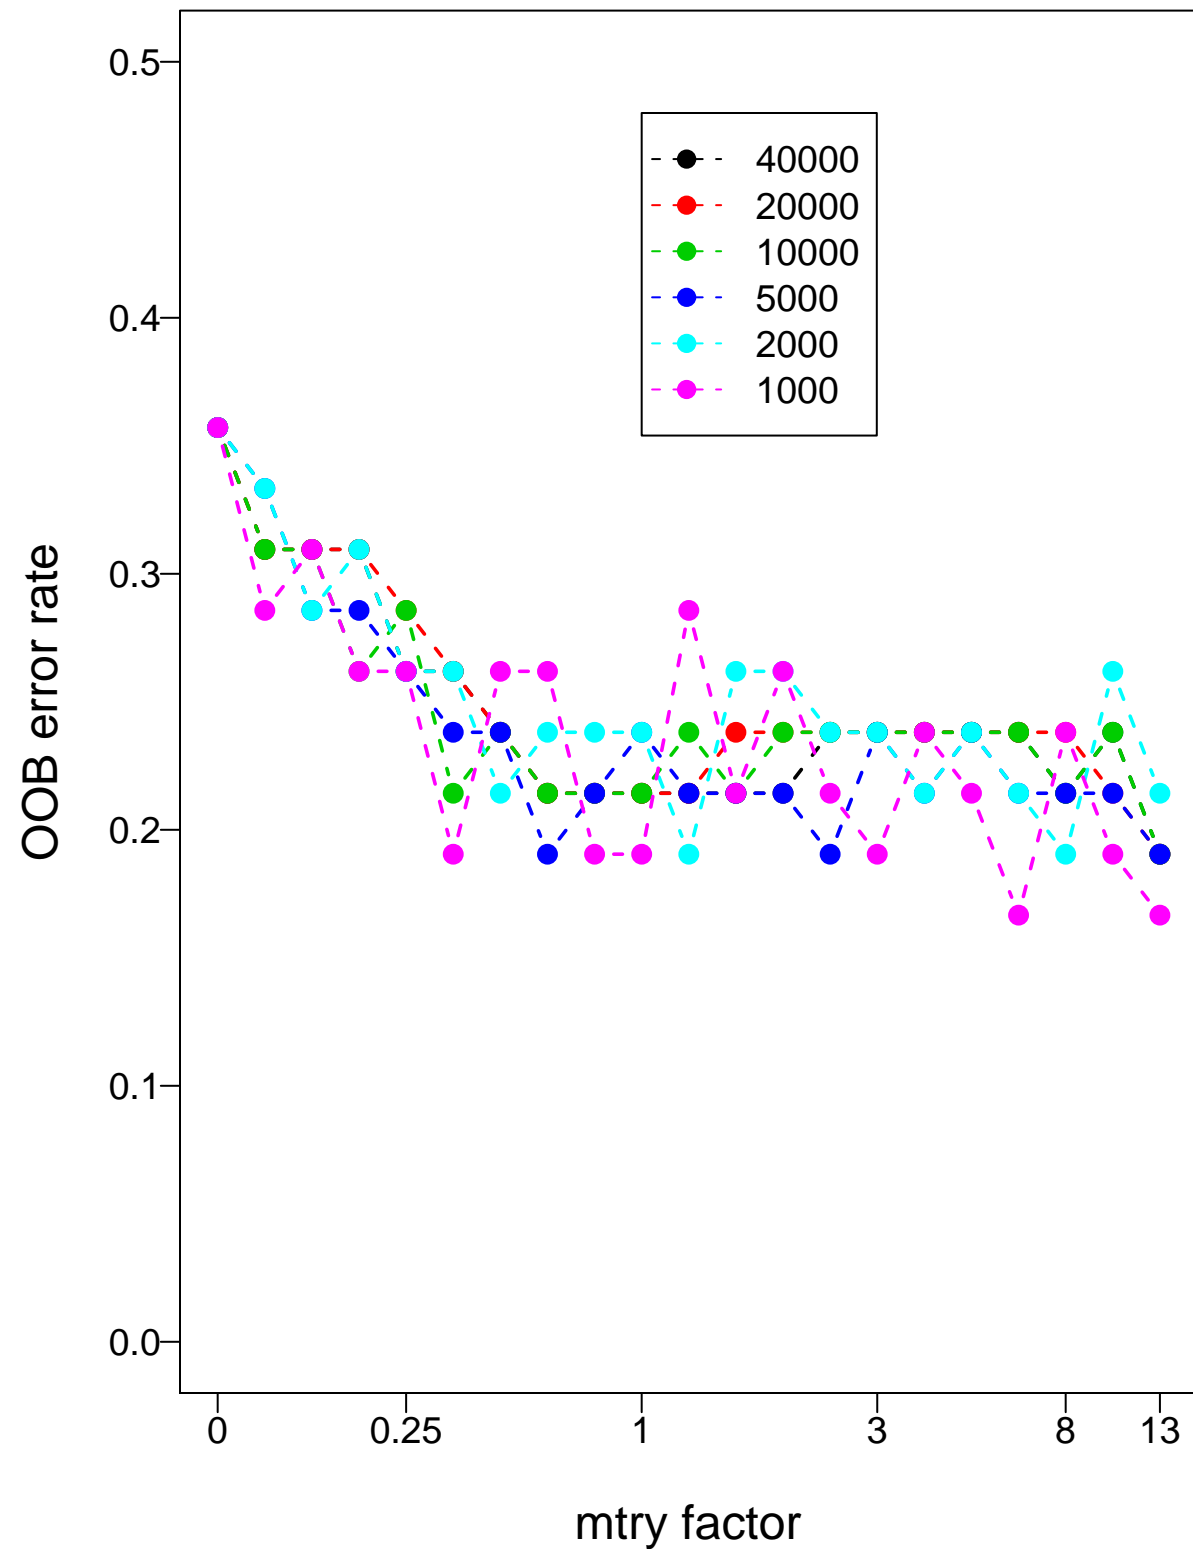

Colon.; nodesize = 1

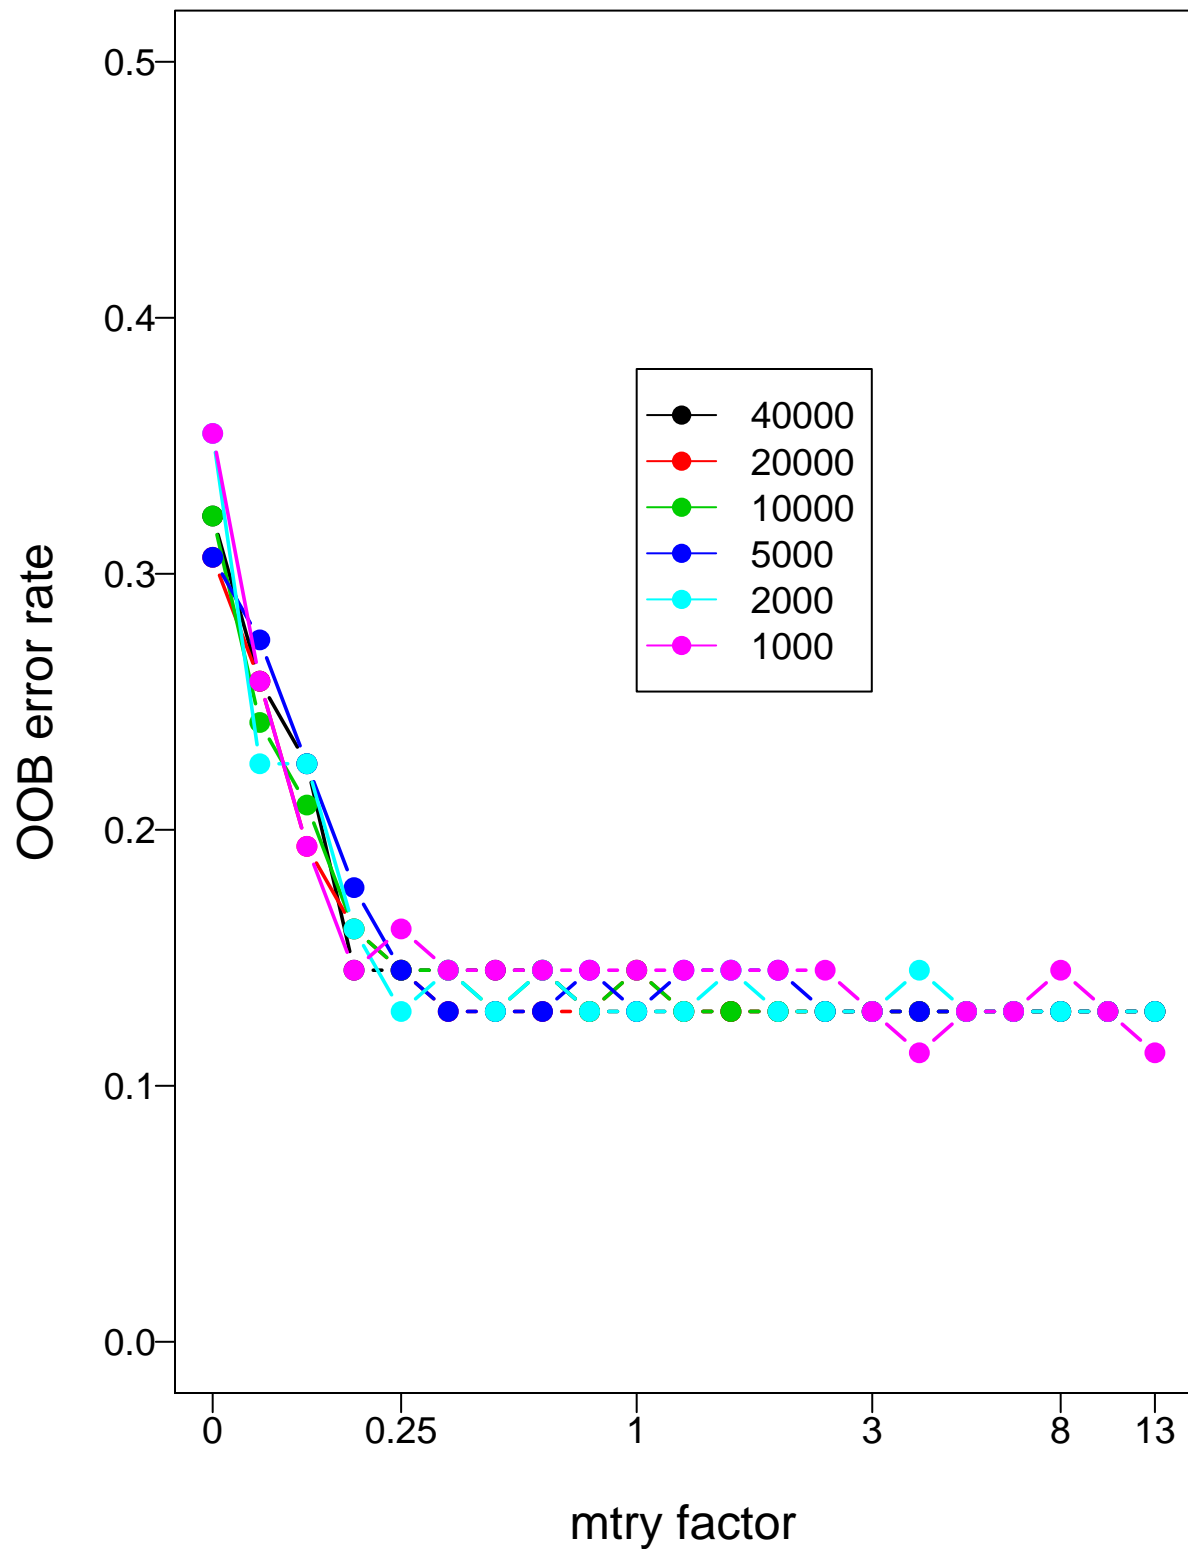

Colon.; nodesize = 5

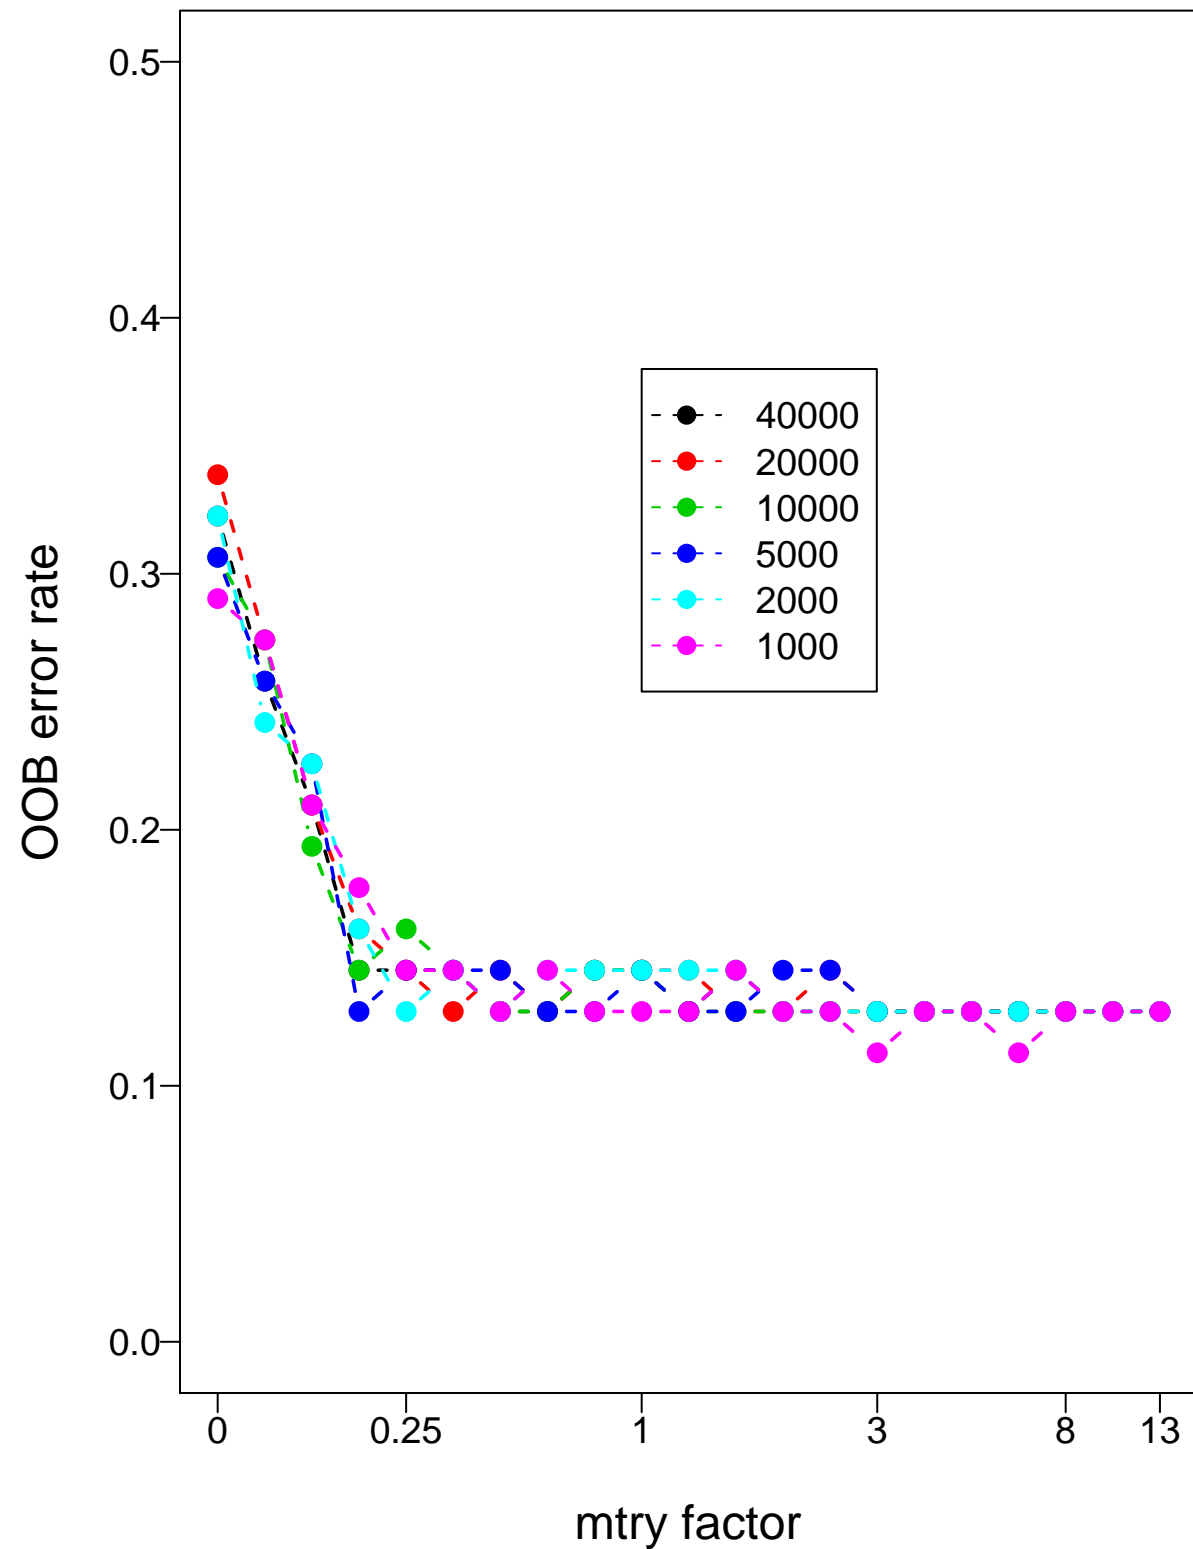

Lymphoma; nodesize = 1

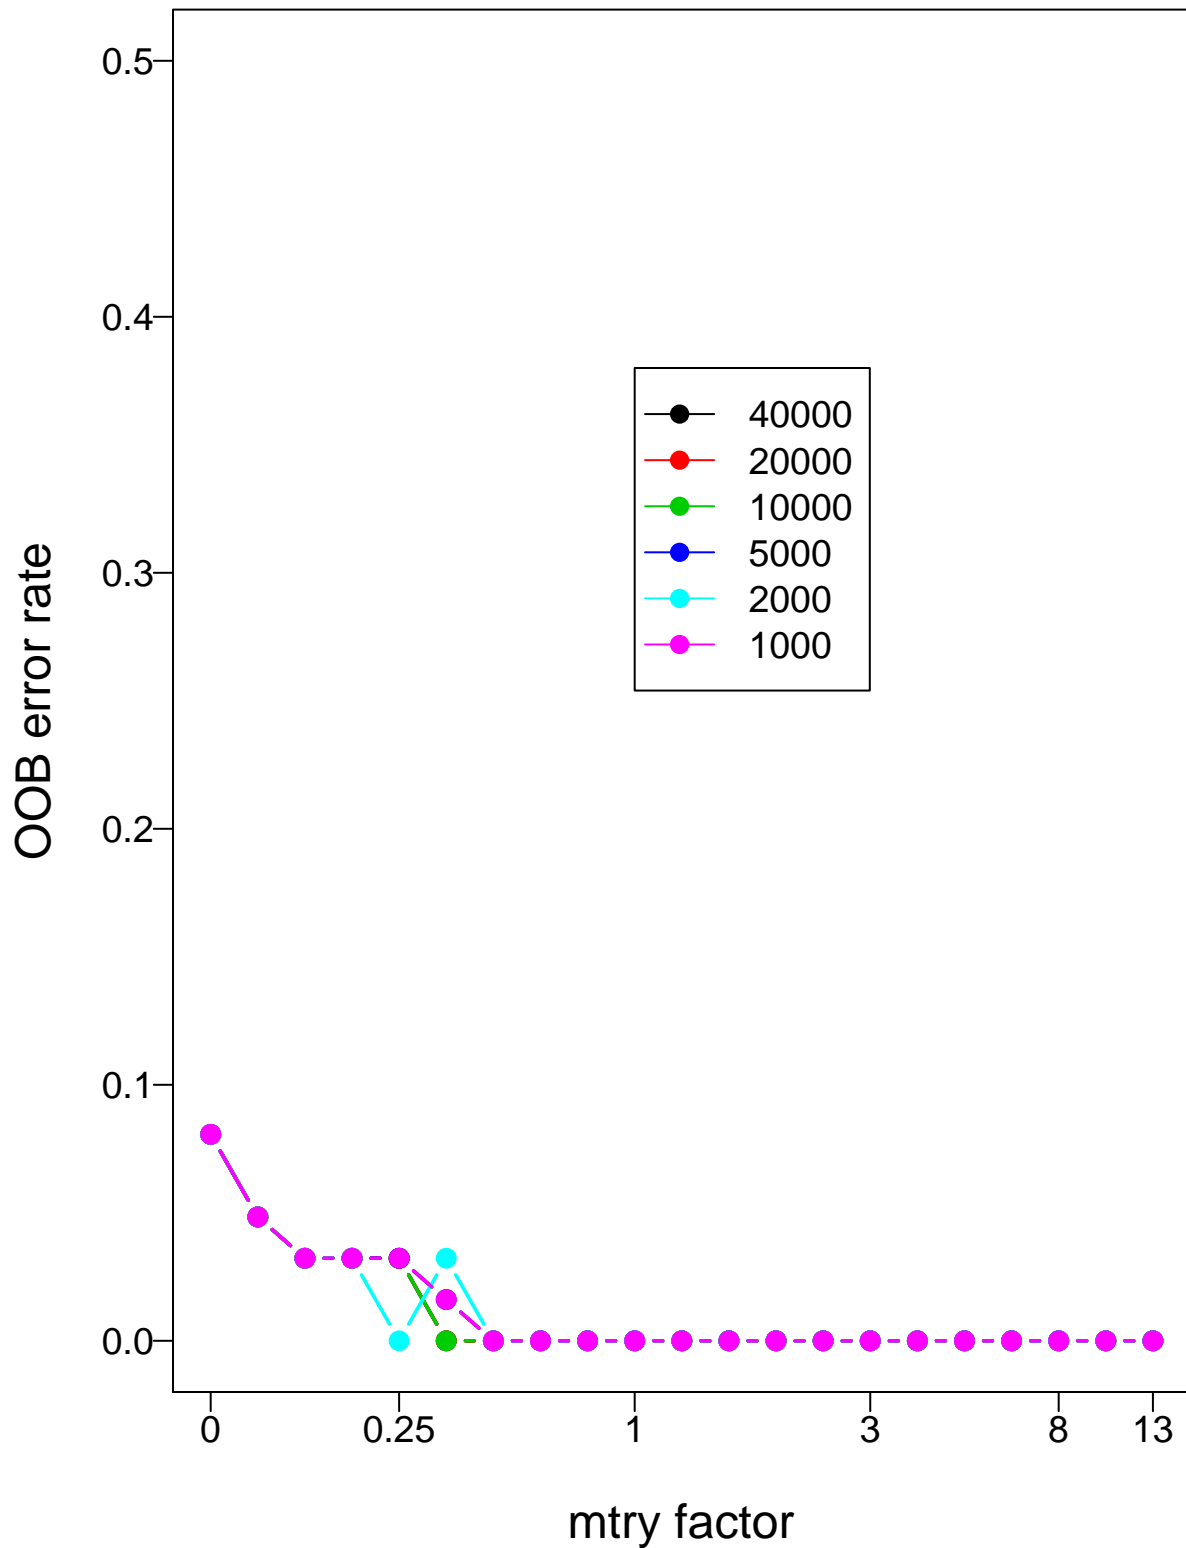

Lymphoma; nodesize = 5

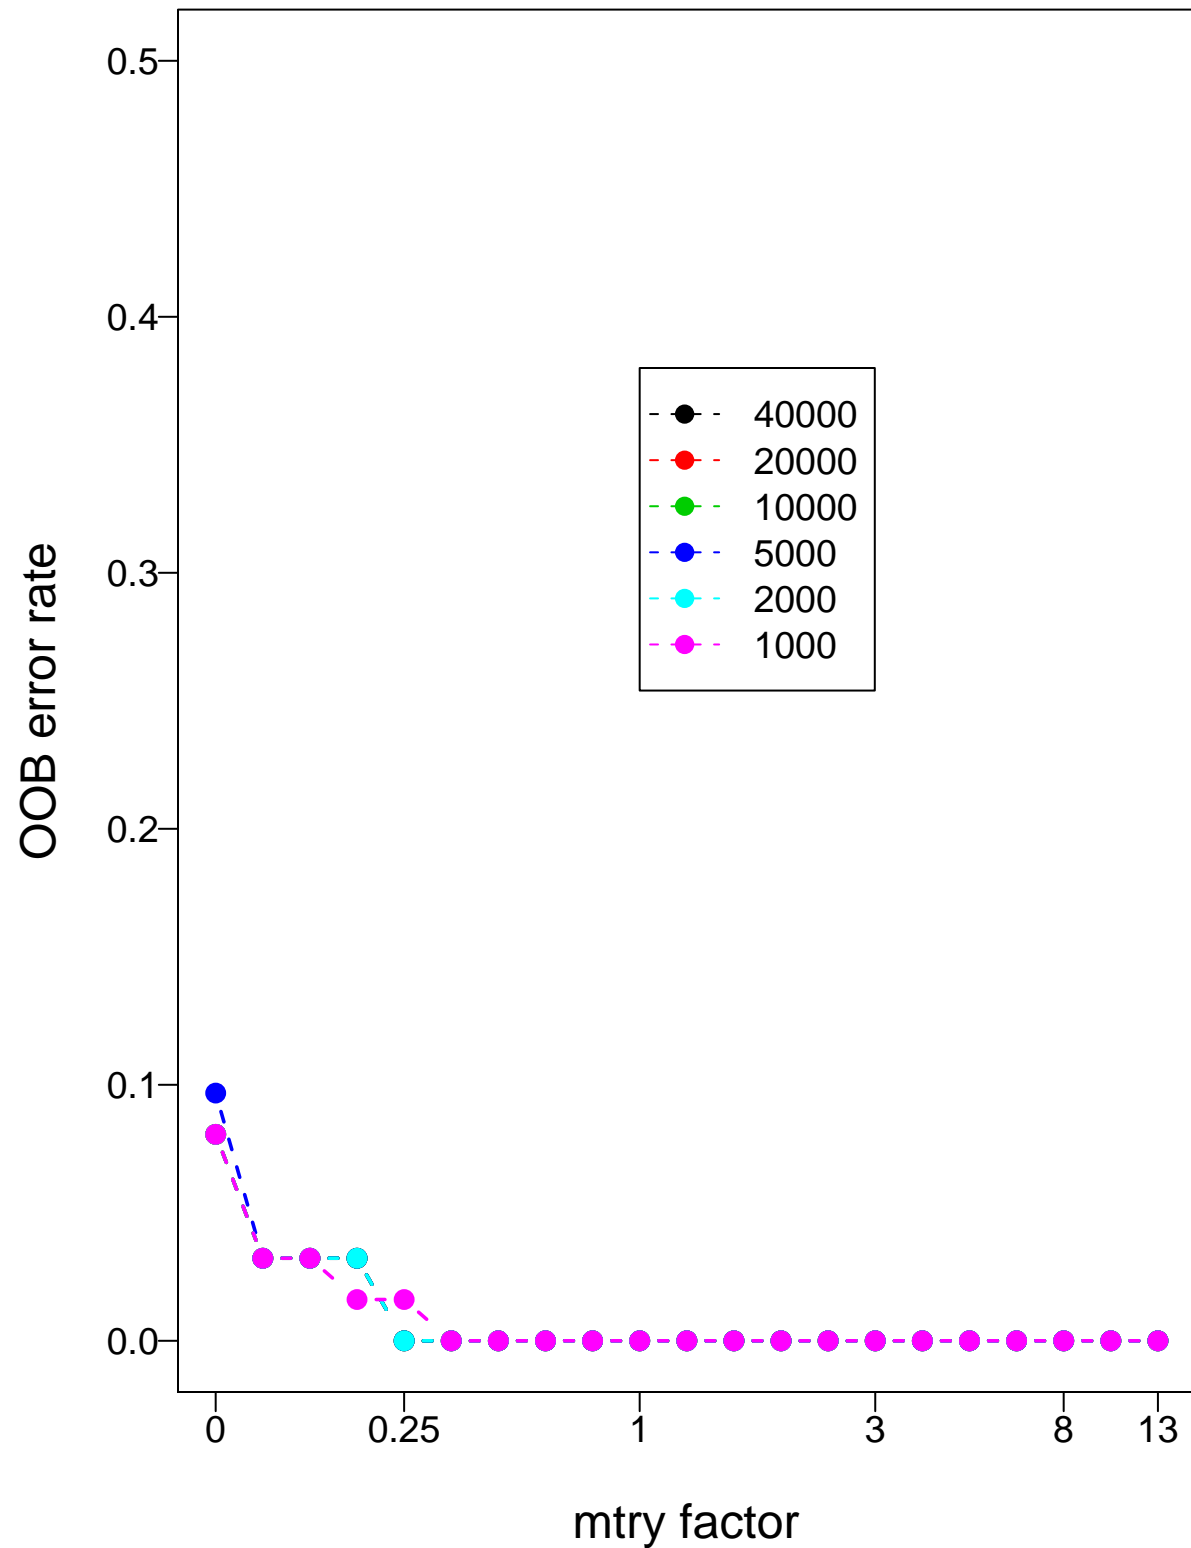

Prostate; nodesize = 1

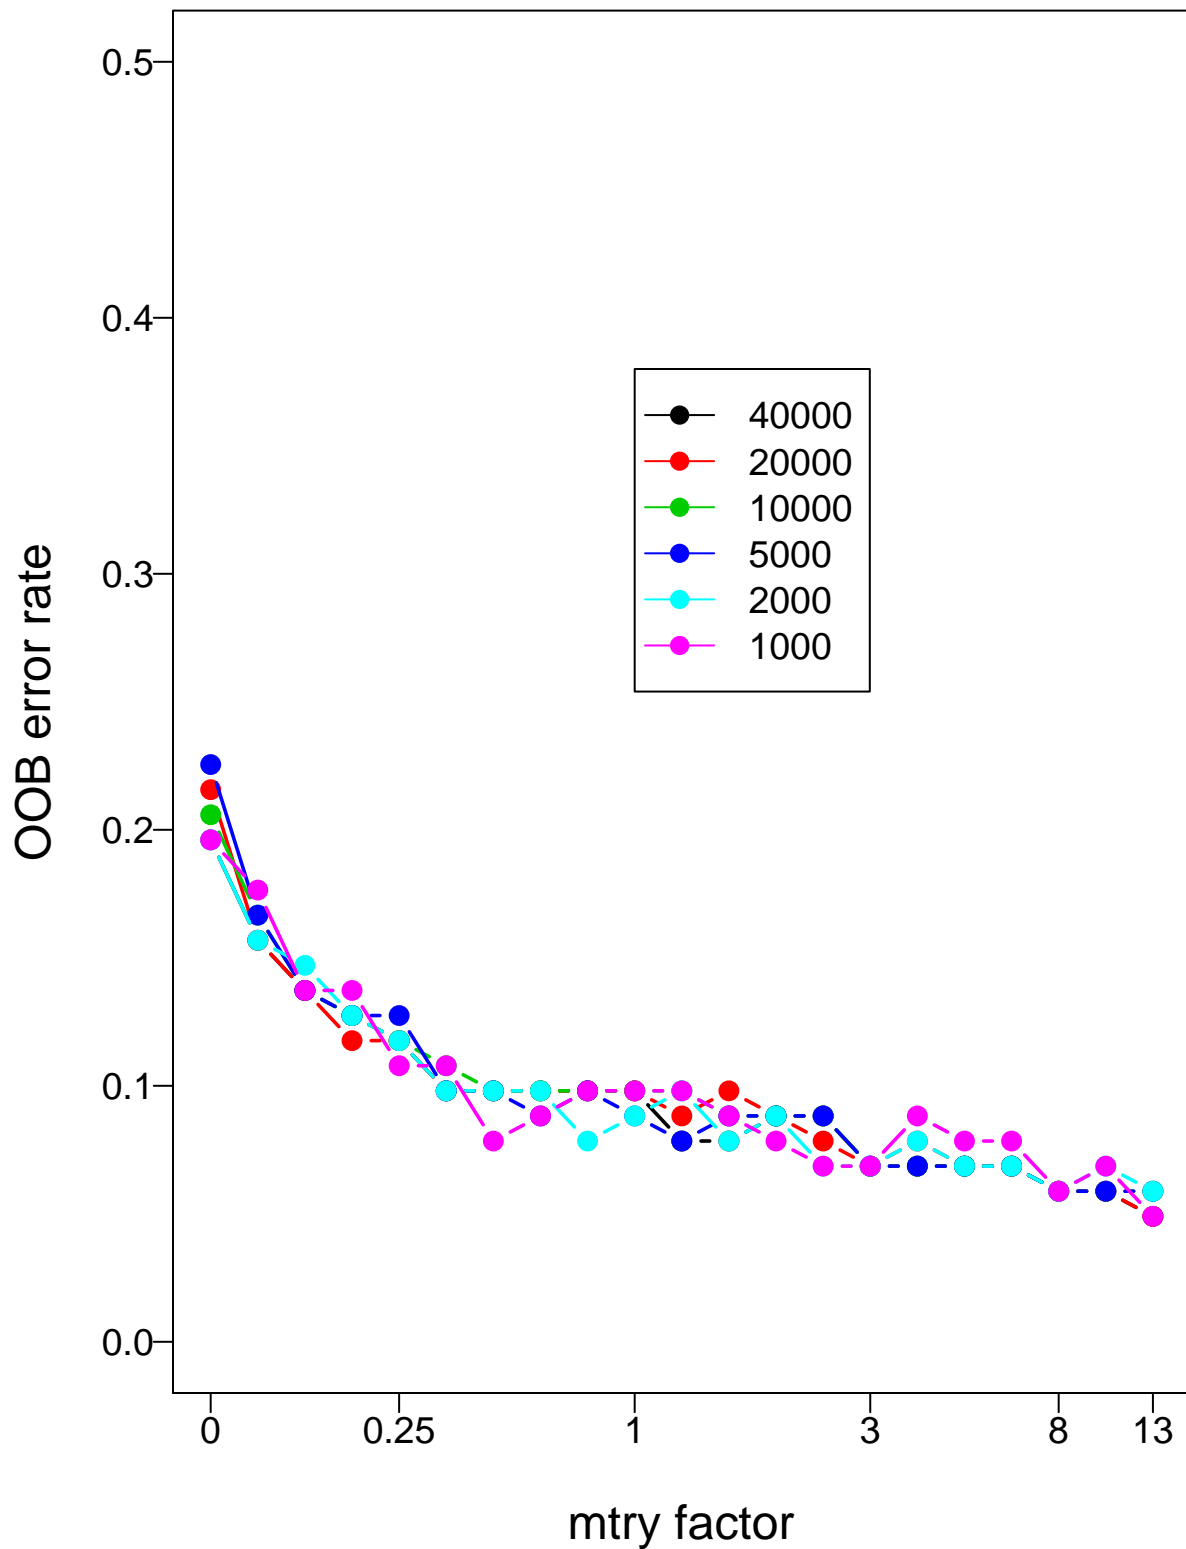

Prostate; nodesize = 5

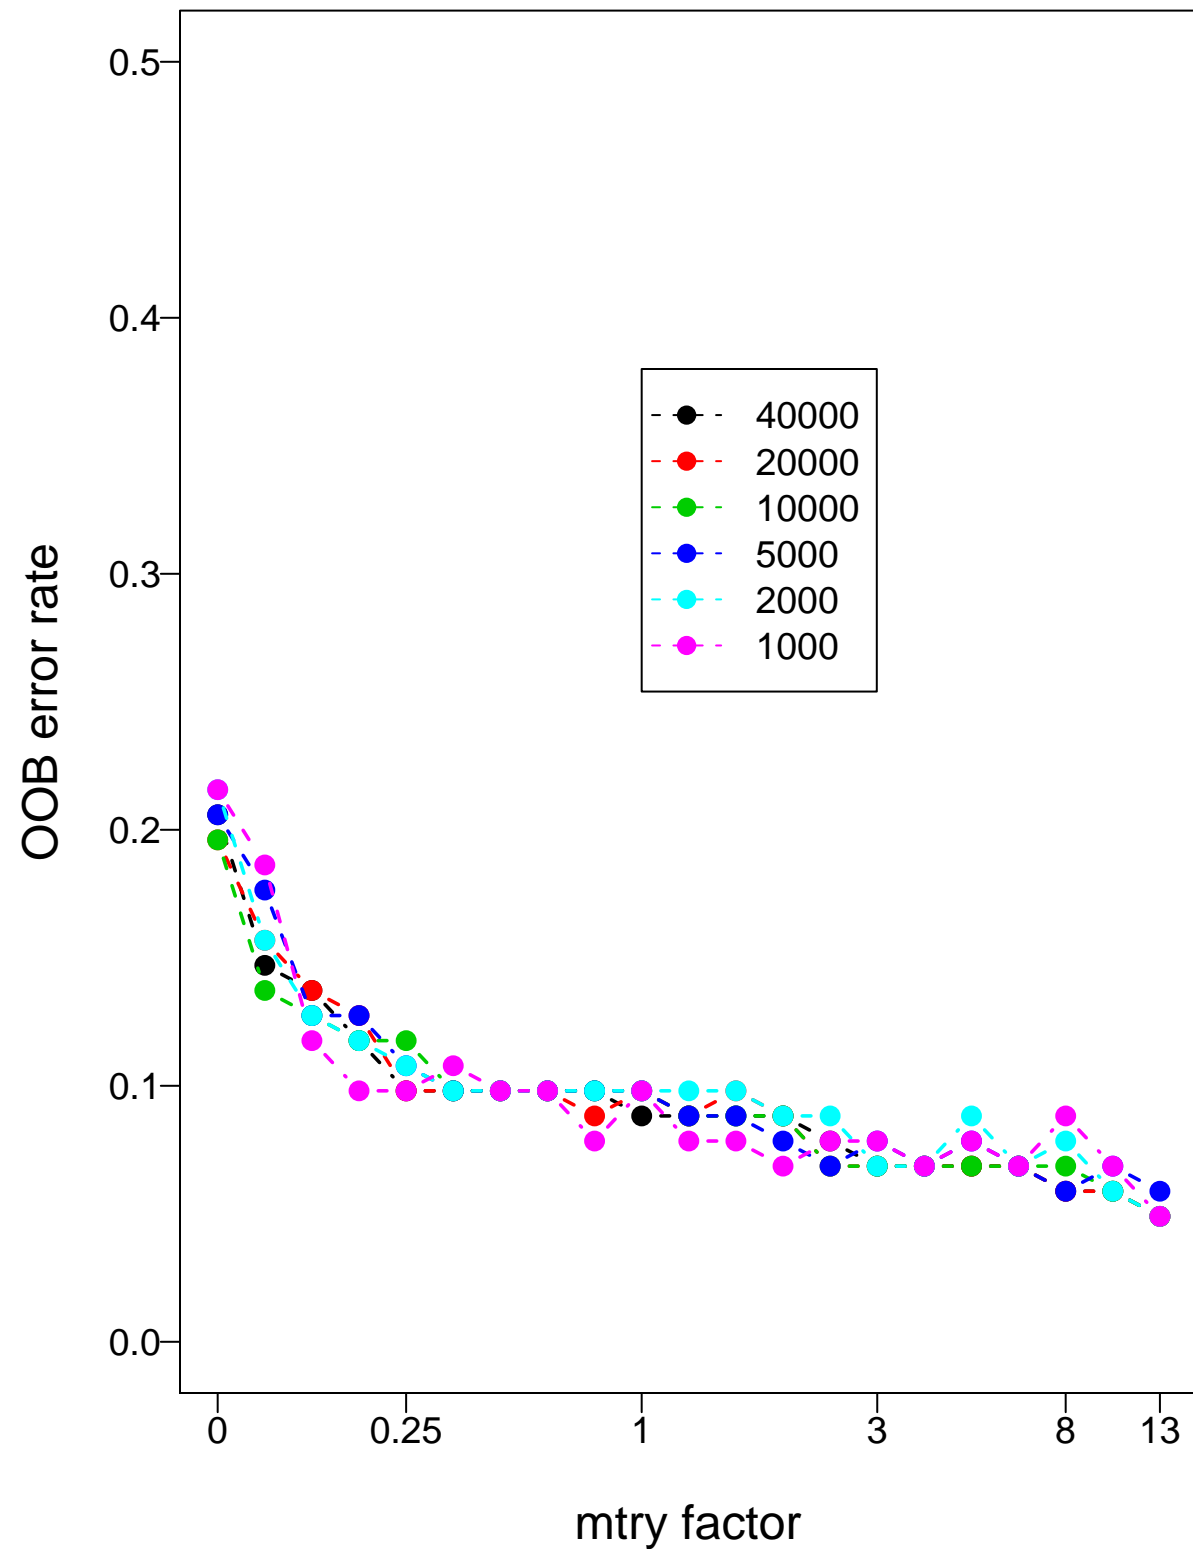

Supplement: 1471-2105-7-3-S2.pdf [file 1471-2105-7-3-S2.pdf]
